# Supplementary material for: Diastereo- and enantioselective reductive amination of cycloaliphatic ketones by preformed chiral palladium complexes
Source: Royal Society of Chemistry journal article supplement (doi:10.1039/c4cy00058g), 2014-01-01
Supplement: c4cy00058g1.pdf [file c4cy00058g1.pdf]

## Supplementary Information

### Diastereo- and Enantioselective Reductive Amination of Cycloaliphatic Ketones by Preformed Chiral Palladium Complexes

Armando Cabrera<sup>\*a</sup>, Pankaj Sharma<sup>a</sup>, F. Javier Pérez-Flores, Luis Velasco<sup>a</sup>, J. Luis Arias<sup>b</sup> and Laura Rubio-Pérez<sup>\*a</sup>

<sup>a</sup> Instituto de Química, Universidad Nacional Autónoma de México, Circuito Exterior, Ciudad Universitaria, México, 04510, D. F., México.

<sup>b</sup> Facultad de Estudios Superiores Cuautitlán, Departamento de Química, UNAM, Cuautitlán Izcalli, Estado de México 54700

[arcaor1@unam.mx](mailto:arcaor1@unam.mx) and [laurarpz@unam.mx](mailto:laurarpz@unam.mx)

#### Table of contents:

|                                                                                                 |     |
|-------------------------------------------------------------------------------------------------|-----|
| General and materials.....                                                                      | S2  |
| Crystal structure of Pd[( <i>R</i> )-Tol-BINAP]Br <sub>2</sub> ( <b>1e</b> ).....               | S3  |
| Preparation of complex and crystal structure of <b>1h</b> .....                                 | S3  |
| Preparation of complex and crystal structure of <b>1i</b> .....                                 | S4  |
| Preparation of complex <b>1j</b> .....                                                          | S6  |
| General procedure for reductive amination of cyclic ketones.....                                | S6  |
| General procedure for asymmetric reductive amination of 2-methylcyclopentanone.....             | S10 |
| General procedure for asymmetric reductive amination of 2-methylcyclohexanone.....              | S16 |
| General procedure for asymmetric reductive amination of ( <i>R</i> )-3-methylcyclohexanone..... | S19 |
| General procedure for asymmetric reductive amination of other substituted rings.....            | S21 |
| References.....                                                                                 | S23 |
| Scanned spectra of NMR and GC-MS (EI) or HPLC for all compounds.....                            | S24 |

## General:

All reactions and manipulations were carried out by using Schlenk-type techniques. Flash column chromatography was performed on silica gel (70-230 mesh).  $^1\text{H}$  NMR,  $^{13}\text{C}$  NMR and  $^{31}\text{P}$  NMR spectra were obtained on a JEOL GX-300, Bruker-Avance 300, Varian Unity 300 (300, 75 and 121 MHz respectively), and Varian Inova Plus 500 (500 for  $^1\text{H}$  and 125 MHz for  $^{13}\text{C}$ ) spectrometers using TMS as the internal reference in  $\text{CDCl}_3$  as solvent. All chemical shifts ( $\delta$ ) are reported in ppm and coupling constants ( $J$ ) are reported in Hz to apparent peak multiplications. 2D NOESY, DEPT and  $^1\text{H}/^{13}\text{C}$  HSQC sequences were used for help the assignments of the  $^1\text{H}$  and  $^{13}\text{C}$  spectra. IR spectra were recorded on a Nicolet FTIR Magna 750 spectrophotometer and the characteristic absorption frequencies are reported in  $\text{cm}^{-1}$ . Optical rotations were performed on a Perkin-Elmer 343 spectropolarimeter (589 nm). Mass spectra were obtained using a JEOL JMS-SX102A instrument with *m*-nitrobenzyl alcohol as the matrix ( $\text{FAB}^+$  mode), and a JEOL JMS-AX505-A (EI mode at 70 eV). Elemental compositions were calculated within an uncertainty of 5 ppm by using the program installed in the computer system. The enantiomeric excess were determined by GC-MS analyses employing a Hewlett Packard 5890 (series II) instrument coupled with a JEOL JMS-AX505-A GC/MS-EI and Agilent Technologies 6890N coupled with JMS-GC/MS at 70 eV instruments employing a chiral capillary column Cyclodex- $\beta$  (0.32 mm x 0.32 mm x 50 m) and He as a carrier gas. HPLC analyses were performed on a Hewlett Packard 1100 system with UV-DAD. Separations were achieved on a Daicel Chiracel OD-H (25 x 4.6mm) column. X-ray determination was collected on a Bruker SMART APEX CCD area diffractometer by the  $\omega$ -scan method.

## Materials:

All reagents were obtained from commercial suppliers and used without further purification. Diethyl ether and benzene were distilled from sodium-benzophenone and chloroform was distilled from  $\text{P}_2\text{O}_5$  under nitrogen. Other solvents were HPLC grade. The  $\text{Pd}(\text{MeCN})_2\text{Br}_2$ ,  $\text{Pd}[(R)\text{-BINAP}]\text{Cl}_2$  (**1b**),  $\text{Pd}[(R)\text{-BINAP}]\text{Br}_2$  (**1c**),  $\text{Pd}[(S)\text{-BINAP}]\text{Br}_2$  (**1d**),  $\text{Pd}[(R)\text{-Tol-BINAP}]\text{Br}_2$  (**1e**),  $\text{Pd}[(S)\text{-Tol-BINAP}]\text{Br}_2$  (**1f**) and  $\text{Pd}[(S,S)\text{-CHIRAPHOS}]\text{Br}_2$  (**1g**) complexes were prepared according to the literature procedures.<sup>1-3</sup>

Crystal structure of Pd[(*R*)-Tol-BINAP]Br<sub>2</sub> (**1e**):

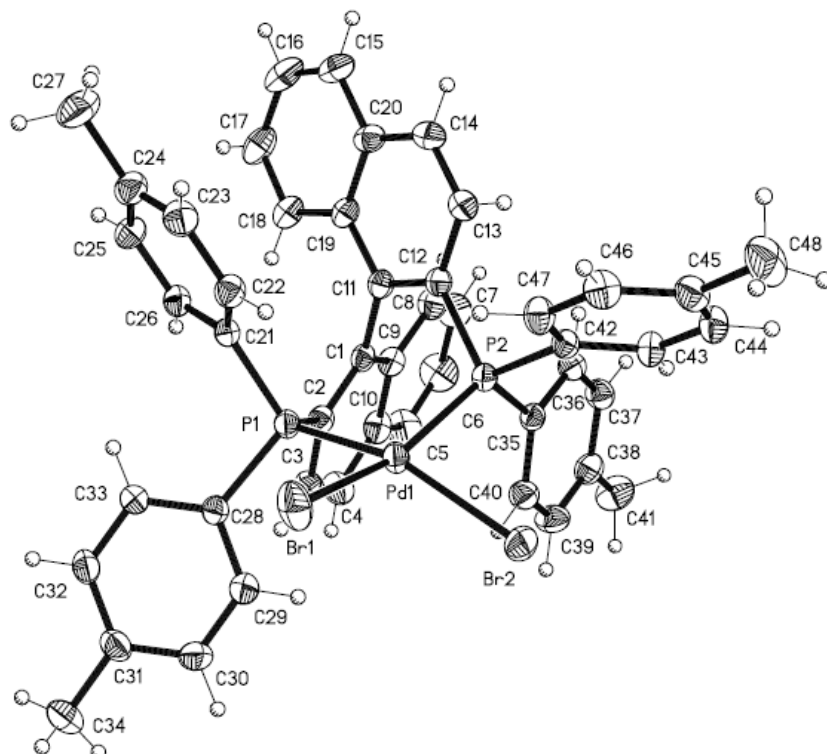

**Figure S1.** X-Ray diffraction structure of catalyst Pd[(*R*)-Tol-BINAP]Br<sub>2</sub> (**1e**). Selected bond lengths (Å): Pd(1)–Br(1) 2.4918(5); Pd(1)–Br(2) 2.4898(5); Pd(1)–P(1) 2.2473(1); Pd(1)–P(2) 2.2613(9); selected angles (°): P(1)–Pd(1)–Br(2) 158.08(3); P(2)–Pd(1)–Br(1) 159.00(3); P(1)–Pd(1)–P(2) 94.14(3); P(1)–Pd(1)–Br(1) 90.27(3); P(2)–Pd(1)–Br(2) 88.80(3); Br(2)–Pd(1)–Br(1) 94.733(1).

### Preparation of complex **1h**:

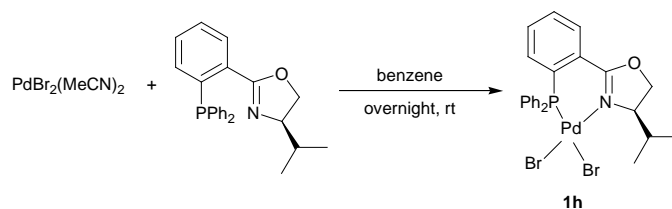

This complex was synthesized by modified method described for the synthesis of PdCl<sub>2</sub>[(*S*)-P<sup>^</sup>N] reported in the literature.<sup>4</sup> In a Schlenk tube, PdBr<sub>2</sub>(MeCN)<sub>2</sub> (174 mg, 0.5 mmol) was suspended in 10 mL of benzene. (*R*)-2-(2-(diphenylphosphino)phenyl)-4-isopropyl-1,3-oxazoline (186.5 mg, 0.5 mmol) was added. The suspension was stirred at room temperature for overnight. The yellow precipitate was collected by filtration, washed several times with diethyl ether and dried in vacuum. The complex was pure enough for further purposes, but it can be crystallized by the slow diffusion of diethyl ether into a concentrated solution of the solid in a mixture of dichloromethane:acetone (1:1) to obtain orange

crystals (yield: 82%). The presence of crystallization solvent in the product was ascertained by  $^1\text{H}$  NMR spectroscopy.  $^1\text{H}$  NMR (300 MHz,  $\text{CDCl}_3$ )  $\delta$  8.16-8.12 (m, 1H, ArH), 7.75-7.29 (m, 12H, ArH), 6.98-6.92 (m, 1H, ArH), 5.71-5.68 (m, 1H, -CHN), 4.51 (t, 1H,  $J = 9.3$  Hz,  $-\text{CH}_2\text{O}$ ), 4.36 (q, 1H,  $J = 4.4$  Hz,  $-\text{CH}_2\text{O}$ ), 2.60-2.54 (m, 1H,  $\text{CH}(\text{CH}_3)_2$ ), 0.78 (d, 3H,  $J = 7.1$  Hz,  $-\text{CH}(\text{CH}_3)_2$ ), -0.03 (d, 3H,  $J = 7.1$  Hz,  $-\text{CH}(\text{CH}_3)_2$ );  $^{31}\text{P}$  NMR (121 MHz,  $\text{CDCl}_3$ )  $\delta$  26.7 (s, 1P,  $\{(R)\text{-P}^*\text{N}\}$ ); IR (dissolution in  $\text{CHCl}_3$ ,  $\text{cm}^{-1}$ ) 1624, 1570, 1247, 1100; MS (FAB $^+$ )  $m/z$ : 638  $[\text{M} + 1]^+$ , 560 (100), 478 (13), 402 (18); HRMS (FAB)  $m/z$  calcd for  $\text{C}_{24}\text{H}_{25}\text{Br}_2\text{NOP}_2\text{Pd}$   $[\text{M} + 1]^+$  637.9075, found 637.9076;  $[\alpha]_{\text{D}}^{20}$  -258.5 (c 0.4, acetone).

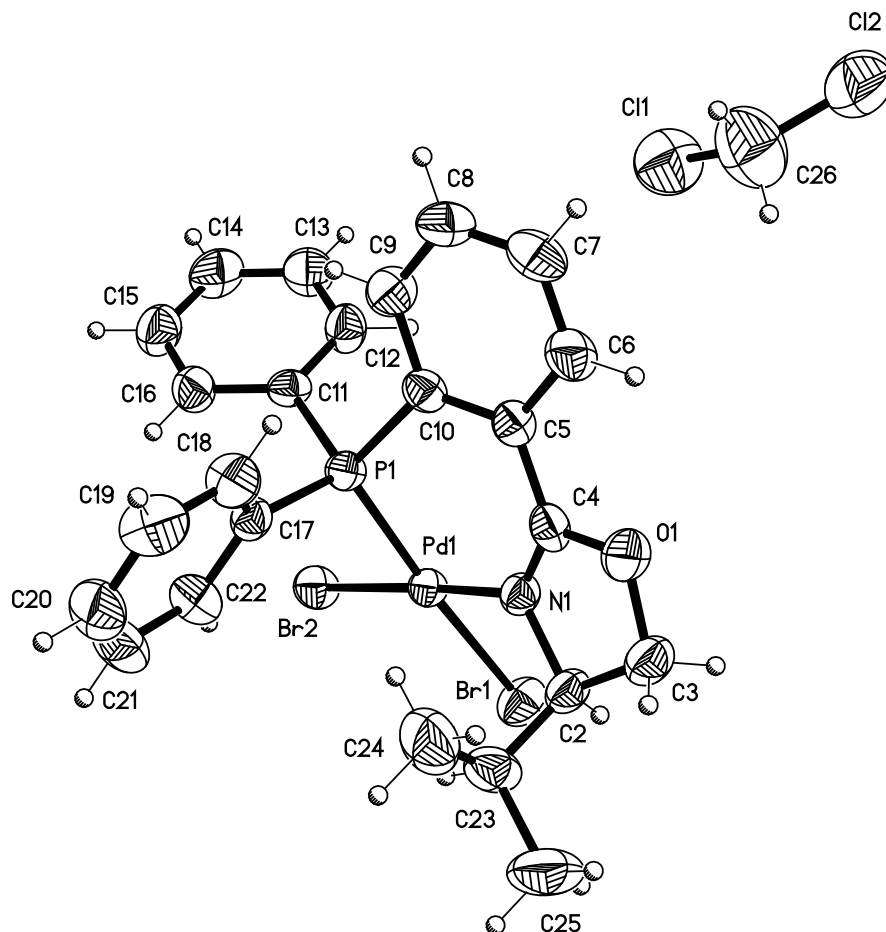

**Figure S2.** X-Ray diffraction structure of catalyst  $\text{Pd}[(R)\text{-PHOX}]\text{Br}_2\cdot\text{CH}_2\text{Cl}_2$  (**1h**); selected bond lengths ( $\text{\AA}$ ): Pd(1)–Br(1) 2.511(1); Pd(1)–Br(2) 2.414(1); Pd(1)–P(1) 2.223(1); Pd(1)–N(1) 2.048(3); selected angles ( $^\circ$ ): N(1)–Pd(1)–P(1) 88.40(9); N(1)–Pd(1)–Br(2) 174.42(9); P(1)–Pd(1)–Br(2) 89.79(3); N(1)–Pd(1)–Br(1) 92.61(9); P(1)–Pd(1)–Br(1) 175.06(3); Br(2)–Pd(1)–Br(1) 89.645(1).

### Preparation of complex 1i:

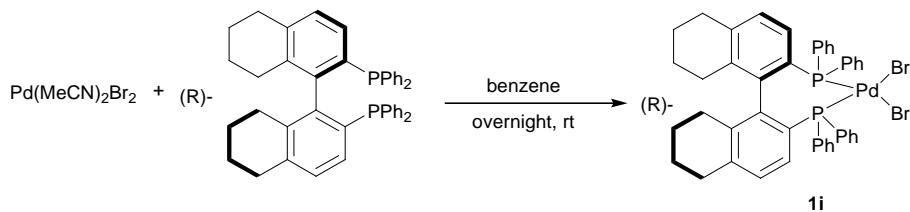

Complex **1i** was prepared by modified method described for the synthesis of Pd[(*R*)-BINAP]Cl<sub>2</sub> reported in the literature.<sup>2</sup> In a Schlenk tube, [(MeCN)<sub>2</sub>]PdBr<sub>2</sub> (174 mg, 0.5 mmol) and (*R*)-(H<sub>8</sub>)-BINAP (315 mg, 0.5 mmol) were suspended in 10 mL of benzene. The suspension was stirred at room temperature for overnight. The yellow-orange precipitate was collected by filtration, washed several times with diethyl ether and dried in vacuum. Yield: 75%. <sup>31</sup>P NMR (121 MHz, CDCl<sub>3</sub>) δ 24.40 (s, 2P, BINAP); <sup>1</sup>H NMR (300 MHz, CDCl<sub>3</sub>) δ 7.87-7.74 (m, 8H, ArH), 7.36-7.18 (m, 12H, ArH), 6.99-6.93 (m, 2H, ArH), 6.65 (d, 2H, *J* = 8.1 Hz, ArH), 2.48-2.40 (m, 2H, -CH<sub>2</sub>), 2.23-2.18 (m, 2H, -CH<sub>2</sub>), 1.85-1.77 (m, 2H, -CH<sub>2</sub>), 1.51-1.20 (m, 10H, -CH<sub>2</sub>); FAB MS (positive ion mode): *m/z*: 815 [M<sup>+</sup> - Br]; HRMS-FAB (*m/z*): calcd for C<sub>44</sub>H<sub>40</sub>BrP<sub>2</sub>Pd [M - Br]<sup>+</sup> 815.0823, found: 815.0827; [α]<sub>D</sub><sup>20</sup> +364 (c 0.2, CHCl<sub>3</sub>).

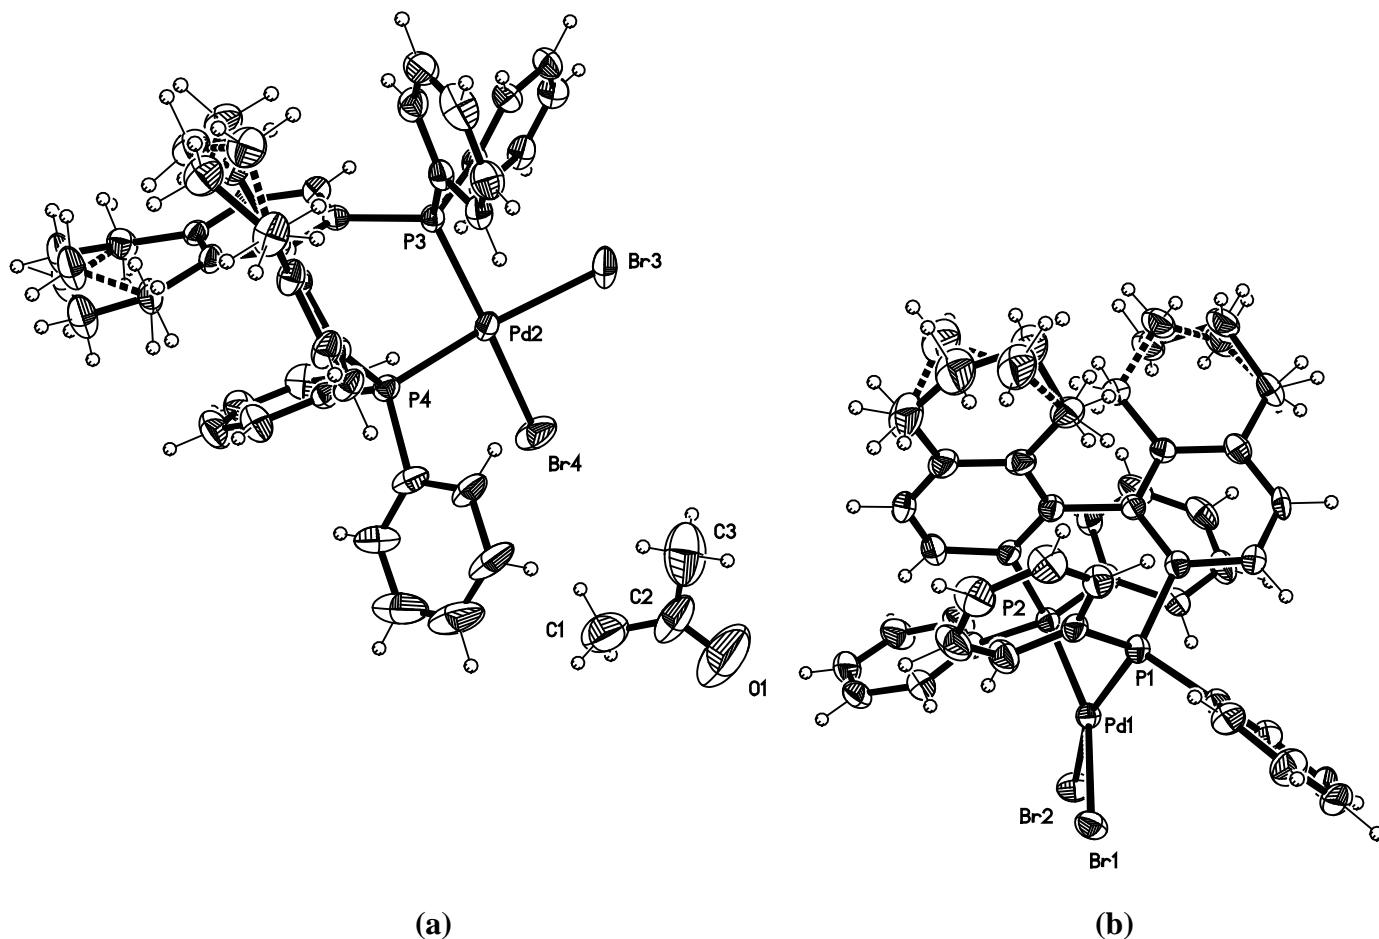

**Figure S3.** X-Ray diffraction structure of catalyst Pd[(*R*)-H<sub>8</sub>-BINAP]Br<sub>2</sub>.COMe<sub>2</sub> (**1h**); selected bond lengths (Å): (a) Pd(2)–Br(3) 2.4778(9); Pd(2)–Br(4) 2.4784(9); Pd(2)–P(3) 2.2731(1); Pd(2)–P(4) 2.2586(1); selected angles (°): P(4)–Pd(1)–Br(3) 169.15(5); P(3)–Pd(1)–Br(4) 163.97(5); P(4)–Pd(1)–P(3) 92.94(6); P(3)–Pd(2)–Br(3) 90.46(5); P(4)–Pd(2)–Br(4) 89.76(5); Br(3)–Pd(2)–Br(4) 89.81(4).

(b) Pd(1)–Br(1) 2.4842(8); Pd(1)–Br(2) 2.4948(8); Pd(1)–P(1) 2.2536(1); Pd(1)–P(2) 2.2632(1); selected angles (°): P(1)–Pd(1)–Br(2) 163.04(4); P(2)–Pd(1)–Br(1) 160.57(5); P(1)–Pd(1)–P(2) 93.00(6); P(1)–Pd(1)–Br(1) 88.95(5); P(2)–Pd(1)–Br(2) 90.66(5); Br(2)–Pd(1)–Br(1) 93.08(3).

### Preparation of complex 1j:

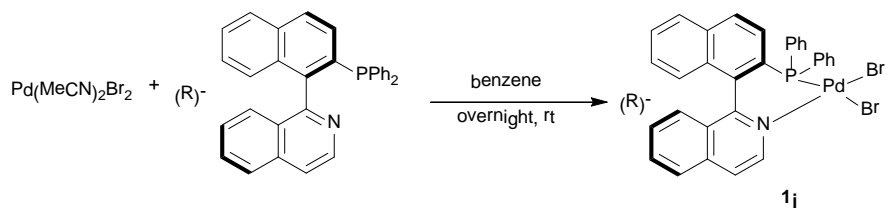

In a Schlenk tube, [(MeCN)<sub>2</sub>]PdBr<sub>2</sub> (174 mg, 0.5 mmol) and (*R*)-QUINAP (219.5 mg, 0.5 mmol) were suspended in 10 mL of benzene. The suspension was stirred at room temperature for overnight. The yellow precipitate was collected by filtration, washed several times with diethyl ether and dried in vacuum. Yield: 68%. <sup>1</sup>H NMR (300 MHz, CDCl<sub>3</sub>) δ 9.57 (d, 1H, *J* = 8.0 Hz, ArH), 8.05 (d, 2H, *J* = 8.0 Hz, ArH), 7.95 (d, 1H, *J* = 8.4 Hz, ArH), 7.61 (d, 1H, *J* = 8.5 Hz, ArH), 7.59-7.52 (m, 5H, ArH), 7.41-7.37 (m, 4H, ArH), 7.31-7.19 (m, 4H, ArH), 6.99-6.91 (m, 3H, ArH), 6.81 (d, 1H, *J* = 8.4 Hz, ArH); <sup>31</sup>P NMR (121 MHz, CDCl<sub>3</sub>) δ 35.43 (s, 1P, BINAP); FAB MS (positive ion mode): *m/z*: 706 [M<sup>+</sup>]; HRMS-FAB (*m/z*): calcd for C<sub>44</sub>H<sub>40</sub>BrP<sub>2</sub>Pd [M<sup>+</sup>] 706.9204, found: 706.9209; ; [α]<sub>D</sub><sup>20</sup> +468 (c 0.21, CHCl<sub>3</sub>).

### General procedure for reductive amination of cyclic ketones.

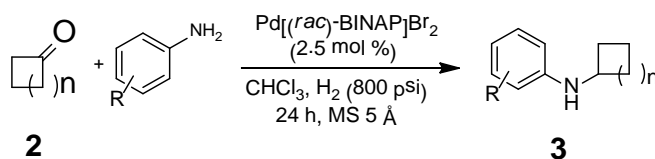

1.0 mmol of cycloaliphatic ketone and 1.3 mmol of aniline derivative were added to a stirred solution of 0.025 mmol of Pd[(*rac*)-BINAP]Br<sub>2</sub>, **1k**, in 10 mL of dry chloroform (in a Schlenk tube) and stirred for 10 minutes. The solution was transferred to a 45 ml stainless steel autoclave (PARR) previously purged with vacuum-N<sub>2</sub> and containing 50 mg of MS 5Å. Subsequently, the reaction was taken to the desired pressure (800 psi H<sub>2</sub>), stirred in an oil bath at 80°C for 24 h. At the end of this period, the gas was liberated. The solution was analyzed by GC-MS to quantify the remaining substrate, and was later

concentrated under reduced pressure, affording a crude residue, which was purified by column chromatography over silica gel (70-230 mesh), and eluted with hexane-ethyl acetate (99/1) to isolate the corresponding product.

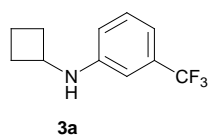

***N*-cyclobutyl-3-(trifluoromethyl)benzenamine (3a)**. Prepared according to the general procedure from 2-cyclobutanone (75  $\mu$ L, 1.0 mmol), *m*-trifluoromethyl aniline (162  $\mu$ L, 1.3 mmol) and Pd[(*rac*)-BINAP]Br<sub>2</sub>, **1k**, (22 mg, 0.025 mmol) at 80

$^{\circ}$ C for 24 h, to provide the title compound as colorless oil (95%). <sup>1</sup>H NMR (300 MHz, CDCl<sub>3</sub>)  $\delta$  7.14 (t, 2H, *J* = 7.8 Hz, ArH), 6.82 (d, 1H, *J* = 7.5 Hz, ArH), 6.64 (s, 1H, ArH), 6.57 (d, 1H, *J* = 8.1 Hz, ArH), 3.89-3.78 (m, 2H, -NHCH + -NHCH), 2.39-2.30 (m, 2H, -CH<sub>2</sub>), 1.80-1.67 (m, 4H, -CH<sub>2</sub>); <sup>13</sup>C NMR (75 MHz, CDCl<sub>3</sub>)  $\delta$  147.3, 131.5 (q, *J* = 31.6 Hz), 129.6, 124.5 (d, *J* = 272.0 Hz), 115.8, 113.5 (q, *J* = 3.9 Hz), 108.9 (q, *J* = 3.9 Hz), 48.7 (-NHCH), 31.0 (-2CH<sub>2</sub>), 15.2 (-CH<sub>2</sub>); IR (film, cm<sup>-1</sup>) 3418, 2926, 2855, 1615, 1517; MS (EI) *m/z*: 215 (M<sup>+</sup>), 187 (100), 166 (29), 145 (21); HRMS (EI) *m/z* calcd for C<sub>11</sub>H<sub>12</sub>NF<sub>3</sub> (M<sup>+</sup>) 215.0922, found 215.0922.

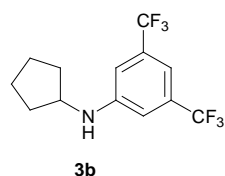

***N*-cyclopentyl-3,5-bis(trifluoromethyl)benzenamine (3b)**. Prepared according to the general procedure from cyclopentanone (88  $\mu$ L, 1.0 mmol), 3,5-bis(trifluoromethyl)aniline (203  $\mu$ L, 1.3 mmol) and Pd[(*rac*)-BINAP]Br<sub>2</sub>, **1k**, (22 mg, 0.025 mmol) at 80  $^{\circ}$ C for 24 h, to provide the title compound as colorless oil

(93%). <sup>1</sup>H NMR (300 MHz, CDCl<sub>3</sub>)  $\delta$  7.14 (s, 1H, ArH), 6.95 (s, 2H, ArH), 4.14 (bs, 1H, -NHCH), 3.87 – 3.83 (m, 1H, -NHCH), 2.14-2.05 (m, 2H, -CH<sub>2</sub>), 1.82-1.67 (m, 4H, -CH<sub>2</sub>), 1.57-1.48 (m, 2H, -CH<sub>2</sub>); <sup>13</sup>C NMR (75 MHz, CDCl<sub>3</sub>)  $\delta$  148.4, 132.3 (q = 32.4 Hz), 123.6 (q = 272.5 Hz), 112.0 (q = 3.0 Hz), 109.5 (q = 3.9 Hz), 54.5 (-NHCH), 33.2 (-CH<sub>2</sub>), 23.9 (CH<sub>2</sub>); IR (film, cm<sup>-1</sup>) 3414, 2925, 2848, 1615, 1517; MS (EI) *m/z*: 297 (M<sup>+</sup>), 78 (13), 268 (100), 255 (16), 242 (11), 213 (14); HRMS (EI) *m/z* calcd for C<sub>13</sub>H<sub>13</sub>NF<sub>6</sub> (M<sup>+</sup>) 297.0957, found 297.0952.

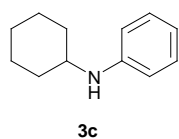

***N*-cyclohexylbenzenamine (3c)**. Prepared according to the general procedure from cyclohexanone (103  $\mu$ L, 1.0 mmol), 3,5-bis(trifluoromethyl)aniline (203  $\mu$ L, 1.3 mmol) and Pd[(*rac*)-BINAP]Br<sub>2</sub>, **1k**, (22 mg, 0.025 mmol) at 80  $^{\circ}$ C for 24 h, to provide the

title compound as colorless oil (89%). <sup>1</sup>H NMR (300 MHz, CDCl<sub>3</sub>)  $\delta$  7.17-7.10 (m, 2H, ArH), 6.67-6.55 (m, 3H, ArH), 3.48 (bs, 1H, -NHCH), 3.28-3.19 (m, 1H, -NHCH), 2.08-2.01 (m, 2H, -CH<sub>2</sub>), 1.79-1.72 (m, 2H, -CH<sub>2</sub>), 1.67-1.61 (m, 1H, -CH<sub>2</sub>), 1.43-1.07 (m, 5H, -CH<sub>2</sub>); <sup>13</sup>C NMR (75 MHz, CDCl<sub>3</sub>)  $\delta$  147.3, 116.7, 113.1, 51.6 (-NHCH), 33.4 (-CH<sub>2</sub>), 25.9 (-CH<sub>2</sub>), 25.0 (-CH<sub>2</sub>); EM-IE (70 eV)

$m/z$ : 175 ( $M^+$ ), 146 (8), 132 (100), 119 (22); HRMS (EI)  $m/z$  calcd for  $C_{12}H_{17}N_1$  ( $M^+$ ) 175.1361, found 175.1356.

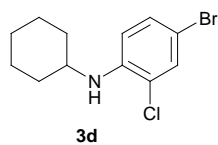

**4-bromo-2-chloro-N-cyclohexylbenzenamine (3d)**. Prepared according to the general procedure from cyclohexanone (103  $\mu$ L, 1.0 mmol), 4-bromo-2-chloroaniline (266.5 mg, 1.3 mmol) and Pd[(*rac*)-BINAP]Br<sub>2</sub>, **1k**, (22 mg, 0.025 mmol) at 80 °C

for 24 h, to provide the title compound as colorless oil (74%). <sup>1</sup>H NMR (300 MHz, CDCl<sub>3</sub>)  $\delta$  7.38 (s, 1H, ArH), 7.22 (dd, 1H,  $J$  = 8.7 Hz, ArH), 6.55 (s, 1H, ArH), 4.23 (d, 1H,  $J$  = 6.60 Hz, -NHCH), 3.33-3.24 (m, 2H, -NHCH), 2.07-1.84 (m, 2H, -CH<sub>2</sub>), 1.82-1.78 (m, 2H, -CH<sub>2</sub>), 1.71-1.64 (m, 1H, -CH<sub>2</sub>), 1.48-1.17 (m, 5H, -CH<sub>2</sub>); <sup>13</sup>C NMR (75 MHz, CDCl<sub>3</sub>)  $\delta$  142.3, 131.4, 130.4, 119.5, 112.6, 106.7, 51.5 (-NHCH), 33.0 (-CH<sub>2</sub>), 25.8 (CH<sub>2</sub>), 24.8 (CH<sub>2</sub>); IR (film, cm<sup>-1</sup>) 3415, 2927, 2850, 1615, 1517; MS (EI)  $m/z$ : 287 ( $M^+$ ), 187 (100), 166 (29), 145 (21); HRMS (EI)  $m/z$  calcd for  $C_{12}H_{15}NBrCl$  ( $M^+$ ) 287.0076, found 287.0070.

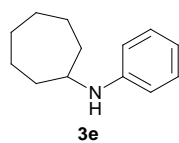

**N-phenylcycloheptanamine (3e)**. Prepared according to the general procedure from cycloheptanone (126  $\mu$ L, 1.0 mmol), aniline (120  $\mu$ L, 1.3 mmol) and Pd[(*rac*)-BINAP]Br<sub>2</sub>, **1k**, (22 mg, 0.025 mmol) at 80 °C for 24 h, to provide the title compound

as colorless oil (92%). <sup>1</sup>H NMR (300 MHz, CDCl<sub>3</sub>)  $\delta$  7.24-7.18 (m, 2H, ArH), 6.73-6.69 (m, 1H, ArH), 6.65-6.58 (m, 2H, ArH), 3.63 (bs, 1H, -NHCH), 3.54-3.47 (m, 1H, -NHCH), 2.09-2.01 (m, 2H, -CH<sub>2</sub>), 1.76-1.45 (m, 10H, -CH<sub>2</sub>); <sup>13</sup>C NMR (75 MHz, CDCl<sub>3</sub>)  $\delta$  147.4, 29.4, 116.9, 113.3, 53.7 (-NHCH), 39.9 (-CH<sub>2</sub>), 28.5 (-CH<sub>2</sub>), 24.5 (-CH<sub>2</sub>); IR (film, cm<sup>-1</sup>) 3404, 2925, 2854, 1602, 1503; MS (EI)  $m/z$ : 189 ( $M^+$ ), 146 (14), 132 (100), 120 (38); HRMS (EI)  $m/z$  calcd for  $C_{13}H_{19}N_1$  ( $M^+$ ) 189.1517, found 189.1520.

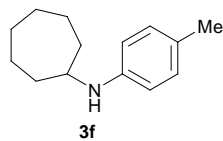

**N-p-tolylcycloheptanamine (3f)**. Prepared according to the general procedure from cycloheptanone (126  $\mu$ L, 1.0 mmol), *p*-toluidine (139 mg, 1.3 mmol) and Pd[(*rac*)-BINAP], Br<sub>2</sub>**1k**, (22 mg, 0.025 mmol) at 80 °C for 24 h, to provide the title

compound as colorless oil (91%). <sup>1</sup>H NMR (300 MHz, CDCl<sub>3</sub>)  $\delta$  6.97 (d, 2H,  $J$  = 7.9 Hz, ArH), 6.51 (d, 2H,  $J$  = 8.2 Hz, ArH), 3.76 (bs, 1H, -NHCH), 3.45-3.38 (m, 1H, -NHCH), 2.23 (s, 3H, -Me), 2.03-1.95 (m, 2H, -CH<sub>2</sub>), 1.70-1.39 (m, 10H, -CH<sub>2</sub>); <sup>13</sup>C NMR (75 MHz, CDCl<sub>3</sub>)  $\delta$  144.6, 129.8, 126.5, 113.9, 54.4 (-NHCH), 34.7 (-CH<sub>2</sub>), 28.4 (-CH<sub>2</sub>), 24.4 (-CH<sub>2</sub>), 20.4 (-Me); IR (film, cm<sup>-1</sup>) 3400, 2924, 2855, 1617, 1517; MS (EI)  $m/z$ : 203 ( $M^+$ ), 160 (5), 146 (25), 68 (100); HRMS (EI)  $m/z$  calcd for  $C_{14}H_{21}N_1$  ( $M^+$ ) 203.1674, found 203.1678.



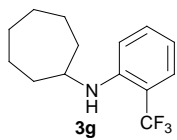

***N*-(2-(trifluoromethyl)phenyl)cycloheptanamine (3g)**. Prepared according to the general procedure from cycloheptanone (118  $\mu\text{L}$ , 1.0 mmol), *o*-trifluoromethyl aniline (163  $\mu\text{L}$ , 1.3 mmol) and Pd[(*rac*)-BINAP]Br<sub>2</sub>, **1k**, (22 mg, 0.025 mmol) at 80 °C for 24 h, to provide the title compound as colorless oil (86%). <sup>1</sup>H NMR (300 MHz, CDCl<sub>3</sub>)  $\delta$  7.45 (dd, 1H, *J* = 7.96, 1.20 Hz, ArH), 7.37 (t, 1H, *J* = 7.81 Hz, ArH), 6.71-6.66 (m, 2H, ArH), 4.32 (bs, 1H, -NHCH), 3.59-3.56 (m, 1H, -NHCH), 2.07-2.00 (m, 2H, -CH<sub>2</sub>), 1.76-1.55 (m, 10H, -CH<sub>2</sub>); <sup>13</sup>C NMR (75 MHz, CDCl<sub>3</sub>)  $\delta$  144.8, 132.9, 126.7 (*q* = 5.5 Hz), 125.3 (*d* = 272.1 Hz), 115.1, 113.1 (*q* = 29.0 Hz), 53.3 (-NHCH), 34.5 (-CH<sub>2</sub>), 28.2 (CH<sub>2</sub>), 24.2 (CH<sub>2</sub>); IR (film, cm<sup>-1</sup>) 3414, 2925, 2849, 1615, 1517; MS (EI) *m/z*: 257 (M<sup>+</sup>, 83), 238 (13), 228 (14), 214 (24), 200 (100); HRMS (EI) *m/z* calcd for C<sub>14</sub>H<sub>18</sub>NF<sub>3</sub> (M<sup>+</sup>) 257.1391, found 257.1389.

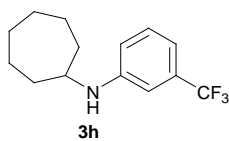

***N*-(3-(trifluoromethyl)phenyl)cycloheptanamine (3h)**. Prepared according to the general procedure from cycloheptanone (118  $\mu\text{L}$ , 1.0 mmol), *m*-trifluoromethylaniline (162  $\mu\text{L}$ , 1.3 mmol) and Pd[(*rac*)-BINAP]Br<sub>2</sub>, **1k**, (22 mg, 0.025 mmol) at 80 °C for 24 h, to provide the title compound as colorless oil (88%). <sup>1</sup>H NMR (300 MHz, CDCl<sub>3</sub>)  $\delta$  7.25 (t, 1H, *J* = 7.9 Hz, ArH), 6.91 (d, 1H, *J* = 7.7 Hz, ArH), 6.76 (s, 1H, ArH), 6.68 (dd, 1H, *J* = 8.3, 2.2 Hz, ArH), 3.84 (bs, 1H, -NHCH), 3.53-3.46 (m, 1H, -NHCH), 2.05-1.97 (m, 2H, -CH<sub>2</sub>), 1.74-1.50 (m, 10H, -CH<sub>2</sub>); <sup>13</sup>C NMR (75 MHz, CDCl<sub>3</sub>)  $\delta$  147.5, 131.6 (*q*, *J* = 32.4 Hz), 129.7, 124.5 (*d*, *J* = 272.2 Hz), 116.0, 113.1 (*q*, *J* = 3.4 Hz), 109.3 (*q*, *J* = 3.4 Hz), 53.6 (-NHCH), 34.7 (-CH<sub>2</sub>), 28.4 (-CH<sub>2</sub>), 24.3 (-CH<sub>2</sub>); IR (film, cm<sup>-1</sup>) 3425, 2929, 2857, 1614, 1515; MS (EI) *m/z*: 257 (M<sup>+</sup>), 228 (3), 214 (24), 200 (100), 187 (19). HRMS (EI) *m/z* calcd for C<sub>14</sub>H<sub>18</sub>NF<sub>3</sub> (M<sup>+</sup>) 257.1391, found 257.1388.

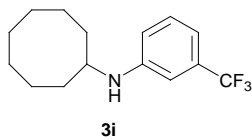

***N*-(3-(trifluoromethyl)phenyl)cyclooctanamine (3i)**. Prepared according to the general procedure from cyclooctanone (132  $\mu\text{L}$ , 1.0 mmol), *m*-trifluoromethyl aniline (162  $\mu\text{L}$ , 1.3 mmol) and Pd[(*rac*)-BINAP]Br<sub>2</sub>, **1k**, (22 mg, 0.025 mmol) at 80 °C for 24 h, to provide the title compound as colorless oil (88%). <sup>1</sup>H NMR (300 MHz, CDCl<sub>3</sub>)  $\delta$  7.13 (dd, 1H, *J* = 7.8 Hz, ArH), 6.78 (d, 1H, *J* = 7.8 Hz, ArH), 6.64 (s, 1H, ArH), 6.57 (dd, 1H, *J* = 8.1, 2.0 Hz, ArH), 3.70 (bs, 1H, -NHCH), 3.45-3.38 (m, 1H, -NHCH), 1.83-1.76 (m, 2H, -CH<sub>2</sub>), 1.66-1.44 (m, 12H, -CH<sub>2</sub>); <sup>13</sup>C NMR (75 MHz, CDCl<sub>3</sub>)  $\delta$  147.4, 131.5 (*q*, *J* = 31.5 Hz), 129.6, 124.0 (*d*, *J* = 272.0 Hz), 115.9, 112.9 (*q*, *J* = 3.8 Hz), 109.2 (*q*, *J* = 3.8 Hz), 52.4 (-NHCH), 32.3 (-CH<sub>2</sub>), 27.1 (-CH<sub>2</sub>), 25.8 (-CH<sub>2</sub>), 23.9 (-CH<sub>2</sub>); IR (film, cm<sup>-1</sup>) 3416, 2926, 2850, 1614, 1515; MS (EI) *m/z*: 271 (M<sup>+</sup>), 252 (5),

228 (8), 214 (7), 200 (100), 187 (31); HRMS (EI)  $m/z$  calcd for  $C_{15}H_{20}F_3N$  ( $M^+$ ) 271.1548, found 271.1550.

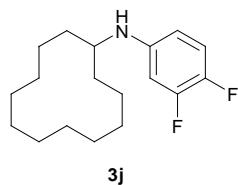

***N*-(3,4-difluorophenyl)cyclododecanamine (3j)**. Prepared according to the general procedure from cyclododecanone (182 mg, 1.0 mmol), 3,4-difluoromethyl aniline (130  $\mu$ L, 1.3 mmol) and Pd[(*rac*)-BINAP]Br<sub>2</sub>, **1k**, (22 mg, 0.025 mmol) at 80 °C for 24 h, to provide the title compound as colorless oil (81%).

<sup>1</sup>H NMR (500 MHz, CDCl<sub>3</sub>)  $\delta$  6.92 (ddd, 1H,  $J_{H-H} = 9.0$ ,  $J_{H-F} = 9.0$ , 1.5 Hz, ArH), 6.35 (ddd, 1H,  $J_{H-H} = 9.5$ ,  $J_{H-F} = 6.5$ , 3.0 Hz, ArH), 6.23-6.19 (m, 1H, ArH), 3.39-3.35 (m, 2H, -NHCH + -NHCH), 1.636-1.57 (m, 1H, -CH<sub>2</sub>), 1.49-1.24 (m, 21H, -CH<sub>2</sub>). <sup>13</sup>C NMR (125 MHz, CDCl<sub>3</sub>)  $\delta$  150.9 (dd = 243.7, 13.7 Hz), 144.8 (d = 8.7Hz), 142.5 (dd = 233.7, 12.5 Hz), 117.3 (d = 12.5 Hz), 108.0 (d = 12.5 Hz), 101.3 (d = 25.0 Hz), 50.2 (-NHCH), 40.3 (-CH<sub>2</sub>), 29.5 (-CH<sub>2</sub>), 24.3 (-CH<sub>2</sub>), 24.0 (-CH<sub>2</sub>), 23.2 (-CH<sub>2</sub>), 23.1(-CH<sub>2</sub>), 21.1 (-CH<sub>2</sub>); IR (film, cm<sup>-1</sup>) 3475, 2955, 2873, 1614, 1518; MS (EI)  $m/z$ : 295 ( $M^+$ , 100), 266 (3), 252 (8), 238 (4), 224 (8), 168 (71); HRMS (EI)  $m/z$  calcd for  $C_{18}H_{27}F_2N$  ( $M^+$ ) 295.2112, found 295.2115.

### General procedure for asymmetric reductive amination of 2-methylcyclopentanone.

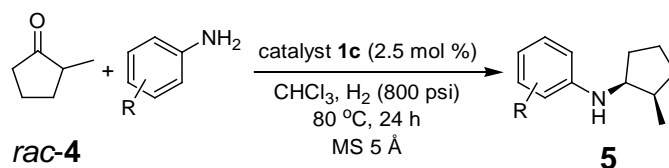

1.0 mmol of *rac*-**4** and 1.3 mmol of aniline derivative were added to a stirred solution of 0.025 mmol of preformed chiral palladium complex in 10 mL of dry chloroform (in a Schlenk tube) and stirred under nitrogen atmosphere for 10 minutes. The solution was transferred to a 45 ml stainless steel autoclave (PARR) previously purged with vacuum-N<sub>2</sub>. Subsequently, the reaction was taken to the desired pressure (900 psi H<sub>2</sub>), stirred in an oil bath at 80°C for 24 h. At the end of this period, the gas was liberated. The solution was analyzed by NMR to quantify the remaining substrate and d.r. respectively, and was later concentrated under reduced pressure, affording a crude residue, which was purified by column chromatography over silica gel (70-230 mesh), and eluted with hexane-ethyl acetate (99/1) to isolate the corresponding product.

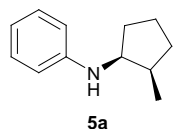

***cis*-N-(phenyl)-2-methylcyclopentanamine (5a)**. Prepared according to the general procedure from 2-methylcyclopentanone (106  $\mu$ L, 1.0 mmol), aniline (120  $\mu$ L, 1.3

mmol) and Pd[(*R*)-BINAP]Br<sub>2</sub>, **1c**, (22 mg, 0.025 mmol) at 80 °C for 24 h, to provide the title compound as light yellow oil (90%). <sup>1</sup>H NMR (500 MHz, CDCl<sub>3</sub>) δ 7.16-7.12 (m, 2H, ArH), 6.64 (t, 1H, *J* = 7.8 Hz, ArH), 6.60 (dd, 2H, *J* = 1.0, 7.8 Hz, ArH), 3.72 (m, 1H, -NHCH), 3.56 (bs, 1H, -NHCH), 2.31-2.22 (m, 1H, -CHCH<sub>3</sub>), 2.02-1.36 (m, 6H, -CH<sub>2</sub>), 0.88 (d, 3H, *J* = 7.0 Hz, -CHCH<sub>3</sub>); <sup>13</sup>C NMR (125 MHz, CDCl<sub>3</sub>) δ 148.2, 129.1, 116.6, 112.9, 57.2 (-NHCH), 35.8 (-CHCH<sub>3</sub>), 32.0 (-CH<sub>2</sub>), 31.5 (-CH<sub>2</sub>), 21.2 (-CH<sub>2</sub>), 14.3 (-CHCH<sub>3</sub>); IR (film, cm<sup>-1</sup>) 3412, 2957, 2871, 1603, 1507; MS (EI) *m/z*: 175 (M<sup>+</sup>), 146 (19), 132 (100), 119 (21); HRMS (EI) *m/z* calcd for C<sub>12</sub>H<sub>17</sub>N(M<sup>+</sup>) 175.1361, found 175.1364; [α]<sub>D</sub><sup>20</sup> +9.2 (c 0.5, CHCl<sub>3</sub>); ee = 98% by GC-MS (EI) [chiral column: Cyclodex-β; conditions: T<sub>inj</sub> = 280 °C; T<sub>det</sub> = 280 °C; T<sub>initial</sub> = 30 °C for 3 min; T<sub>final</sub> = 200 °C; rate = 1°/min; t<sub>R</sub> = 31.3 min (minor), t<sub>R</sub> = 32.2 min (major)]. The relative stereochemistry was assigned by NOE analysis.

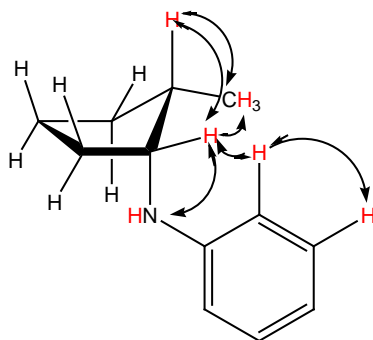

Interactions observed by NOE.

With Pd/C the selectivity *cis/trans* was 62/38.

With catalyst Pd[(*R*)-BINAP]Cl<sub>2</sub>, **1b**: [α]<sub>D</sub><sup>20</sup> +7.8 (c 0.48, CHCl<sub>3</sub>); ee = 92% by GC-MS (EI) [chiral column: Cyclodex-β; conditions: T<sub>inj</sub> = 280 °C; T<sub>det</sub> = 280 °C; T<sub>initial</sub> = 30 °C for 3 min; T<sub>final</sub> = 200 °C; rate = 1°/min; t<sub>R</sub> = 33.1 min (minor), t<sub>R</sub> = 34.3 min (major)].

With catalyst Pd[(*S*)-BINAP]Br<sub>2</sub>, **1d**: [α]<sub>D</sub><sup>20</sup> -11.2 (c 0.5, CHCl<sub>3</sub>); ee = 95% by GC-MS (EI) [chiral column: Cyclodex-β; conditions: T<sub>inj</sub> = 280 °C; T<sub>det</sub> = 280 °C; T<sub>initial</sub> = 30 °C for 3 min; T<sub>final</sub> = 200 °C; rate = 1°/min; t<sub>R</sub> = 31.4 min (major), t<sub>R</sub> = 32.3 min (minor)].

With catalyst Pd[(*R*)-Tol-BINAP]Br<sub>2</sub>, **1e**: [α]<sub>D</sub><sup>20</sup> +8.1 (c 0.5, CHCl<sub>3</sub>); ee = 89% by GC-MS (EI) [chiral column: Cyclodex-β; conditions: T<sub>inj</sub> = 280 °C; T<sub>det</sub> = 280 °C; T<sub>initial</sub> = 30 °C for 3 min; T<sub>final</sub> = 200 °C; rate = 1°/min; t<sub>R</sub> = 32.2 min (minor), t<sub>R</sub> = 33.3 min (major)].

With catalyst Pd[(*S*)-Tol-BINAP]Br<sub>2</sub>, **1f**: [α]<sub>D</sub><sup>20</sup> -10.9 (c 0.51, CHCl<sub>3</sub>); ee = 93% by GC-MS (EI) [chiral column: Cyclodex-β; conditions: T<sub>inj</sub> = 280 °C; T<sub>det</sub> = 280 °C; T<sub>initial</sub> = 30 °C for 3 min; T<sub>final</sub> = 200 °C; rate = 1°/min; t<sub>R</sub> = 33.2 min (major), t<sub>R</sub> = 34.3 min (minor)].

With catalyst Pd[(*S,S*)-CHIRAPHOS]Br<sub>2</sub>, **1g**: [ $\alpha$ ]<sub>D</sub><sup>20</sup> +8.6 (c 0.49, CHCl<sub>3</sub>); ee = 96% by GC-MS (EI) [chiral column: Cyclodex- $\beta$ ; conditions: T<sub>inj</sub> = 280 °C; T<sub>det</sub> = 280 °C; T<sub>initial</sub> = 30 °C for 3 min; T<sub>final</sub> = 200 °C; rate = 1°/min; t<sub>R</sub> = 33.4 min (minor), t<sub>R</sub> = 34.5 min (major)].

With catalyst Pd[(*R*)-PHOX]Br<sub>2</sub>, **1h**: [ $\alpha$ ]<sub>D</sub><sup>20</sup> -7.2 (c 0.53, CHCl<sub>3</sub>); ee = 87% by GC-MS (EI) [chiral column: Cyclodex- $\beta$ ; conditions: T<sub>inj</sub> = 280 °C; T<sub>det</sub> = 280 °C; T<sub>initial</sub> = 30 °C for 3 min; T<sub>final</sub> = 200 °C; rate = 1°/min; t<sub>R</sub> = 33.1 min (minor), t<sub>R</sub> = 34.2 min (major)].

With catalyst Pd[(*R*)-H<sub>8</sub>BINAP]Br<sub>2</sub>, **1i**: [ $\alpha$ ]<sub>D</sub><sup>20</sup> +9.0 (c 0.5, CHCl<sub>3</sub>); ee = 98% by GC-MS (EI) [chiral column: Cyclodex- $\beta$ ; conditions: T<sub>inj</sub> = 280 °C; T<sub>det</sub> = 280 °C; T<sub>initial</sub> = 30 °C for 3 min; T<sub>final</sub> = 200 °C; rate = 1°/min; t<sub>R</sub> = 31.3 min (minor), t<sub>R</sub> = 32.2 min (major)].

With catalyst Pd[(*R*)-QUINAP]Br<sub>2</sub>, **1b**: [ $\alpha$ ]<sub>D</sub><sup>20</sup> -8.5 (c 0.51, CHCl<sub>3</sub>); ee = 89% by GC-MS (EI) [chiral column: Cyclodex- $\beta$ ; conditions: T<sub>inj</sub> = 280 °C; T<sub>det</sub> = 280 °C; T<sub>initial</sub> = 30 °C for 3 min; T<sub>final</sub> = 200 °C; rate = 1°/min; t<sub>R</sub> = 32.4 min (minor), t<sub>R</sub> = 33.8 min (major)].

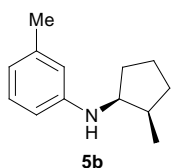

***cis*-N-(3-methylphenyl)-2-methylcyclopentaneamine (5b)**. Prepared according to the

general procedure from 2-methylcyclopentanone (106  $\mu$ L, 1.0 mmol), *m*-toluidine (140  $\mu$ L, 1.3 mmol) and Pd[(*R*)-BINAP]Br<sub>2</sub>, **1c**, (22 mg, 0.025 mmol) at 80 °C for 24 h, to

provide the title compound as light yellow oil (90%). <sup>1</sup>H NMR (300 MHz, CDCl<sub>3</sub>)  $\delta$

7.10 (t, 1H, *J* = 7.9 Hz, ArH), 6.55-6.47 (m, 3H, ArH), 3.77 (m, 1H, -NHCH), 3.63 (bs, 1H, -NHCH), 2.37-2.27 (m, 4H, -CHCH<sub>3</sub> + -Me), 2.10-1.39 (m, 6H, -CH<sub>2</sub>), 0.93 (d, 3H, *J* = 6.8 Hz, -CHCH<sub>3</sub>); <sup>13</sup>C NMR (75 MHz, CDCl<sub>3</sub>)  $\delta$  148.3, 139.0, 129.2, 117.8, 113.8, 110.2, 57.2 (-NHCH), 35.8 (-CHMe), 32.1 (-CH<sub>2</sub>), 31.6 (-CH<sub>2</sub>), 21.8 (-CH<sub>3</sub>), 21.3 (-CH<sub>2</sub>), 14.5 (-CHCH<sub>3</sub>); IR (film, cm<sup>-1</sup>) 3410, 2955, 2868, 1604, 1511; MS (EI) *m/z*: 189 (M<sup>+</sup>), 160 (12), 146 (100), 133 (22); HRMS (EI) *m/z* calcd for C<sub>13</sub>H<sub>19</sub>N(M<sup>+</sup>) 189.1517, found 189.1515; [ $\alpha$ ]<sub>D</sub><sup>20</sup> +8.2 (c 0.5, CHCl<sub>3</sub>); ee = 93% by GC-MS (EI) [chiral column: Cyclodex- $\beta$ ; conditions: T<sub>inj</sub> = 280 °C; T<sub>det</sub> = 280 °C; T<sub>initial</sub> = 30 °C for 3 min; T<sub>final</sub> = 200 °C; rate = 1°/min; t<sub>R</sub> = 30.2 min (minor), t<sub>R</sub> = 31.2 min (major)].

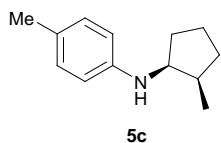

***cis*-N-(4-methylphenyl)-2-methylcyclopentaneamine (5c)**. Prepared according to

the general procedure from 2-methylcyclopentanone (106  $\mu$ L, 1.0 mmol), *p*-toluidine (139 mg, 1.3 mmol) and Pd[(*R*)-BINAP]Br<sub>2</sub>, **1c**, (22 mg, 0.025 mmol) at

80 °C for 24 h, to provide the title compound as yellow oil (91%). <sup>1</sup>H NMR (500 MHz, CDCl<sub>3</sub>)  $\delta$  6.95 (d, 2H, *J* = 8.0 Hz, ArH), 6.53 (d, 2H, *J* = 8.5 Hz, ArH), 3.69 (m, 1H, -NHCH), 3.35 (bs, 1H, -NHCH), 2.29-2.21 (m, 4H, -CHCH<sub>3</sub> + -Me), 2.00-1.35 (m, 6H, -CH<sub>2</sub>), 0.87 (d, 3H, *J* = 7.0 Hz, -CHCH<sub>3</sub>); <sup>13</sup>C

NMR (125 MHz, CDCl<sub>3</sub>)  $\delta$  145.9, 129.6, 125.8, 113.1, 57.5 (-NHCH), 35.7 (-CHCH<sub>3</sub>), 31.9 (-CH<sub>2</sub>), 31.5 (-CH<sub>2</sub>), 21.1 (-CH<sub>2</sub>), 20.3 (-CH<sub>3</sub>), 14.3 (-CHCH<sub>3</sub>); IR (film, cm<sup>-1</sup>) 3409, 2955, 2868, 1618, 1518; MS (EI)  $m/z$ : 189 (M<sup>+</sup>), 160 (17), 146 (100), 133 (37); HRMS (EI)  $m/z$  calcd for C<sub>13</sub>H<sub>19</sub>N(M<sup>+</sup>) 189.1517, found 189.1521; [ $\alpha$ ]<sub>D</sub><sup>20</sup> +5.2 (c 0.5, CHCl<sub>3</sub>); ee = 95% by GC-MS (EI) [chiral column: Cyclodex- $\beta$ ; conditions: T<sub>inj</sub> = 280 °C; T<sub>det</sub> = 280 °C; T<sub>initial</sub> = 30 °C for 3 min; T<sub>final</sub> = 200 °C; rate = 1 °/min; t<sub>R</sub> = 39.0 min (minor), t<sub>R</sub> = 40.2 min (major)].

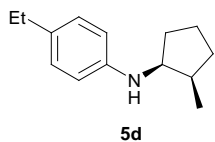

***cis*-N-(4-ethylphenyl)-2-methylcyclopentaneamine (5d)**. Prepared according to the general procedure from 2-methylcyclopentanone (106  $\mu$ L, 1.0 mmol), *p*-ethylaniline (160  $\mu$ L, 1.3 mmol) and Pd[(*R*)-BINAP]Br<sub>2</sub>, **1c**, (22 mg, 0.025 mmol) at

80 °C for 24 h, to provide the title compound as yellow oil (86%). <sup>1</sup>H NMR (300 MHz, CDCl<sub>3</sub>)  $\delta$  7.00 (d, 2H,  $J$  = 7.9 Hz, ArH), 6.57 (d, 2H,  $J$  = 7.9 Hz, ArH), 3.73-3.56 (m, 2H, -NHCH + -NHCH), 2.53 (q, 2H,  $J$  = 7.5 Hz, -CH<sub>2</sub>CH<sub>3</sub>), 2.33-2.22 (m, 1H, -CHCH<sub>3</sub>), 1.99-1.39 (m, 6H, -CH<sub>2</sub>), 1.19 (t, 3H,  $J$  = 7.5 Hz, -CH<sub>2</sub>CH<sub>3</sub>), 0.88 (d, 3H,  $J$  = 7.1 Hz, -CHCH<sub>3</sub>); <sup>13</sup>C NMR (75 MHz, CDCl<sub>3</sub>)  $\delta$  146.1, 132.6, 128.5, 113.1, 57.6 (-NHCH), 35.8 (-CHCH<sub>3</sub>), 32.0 (-CH<sub>2</sub>), 31.5 (-CH<sub>2</sub>), 27.9 (-CH<sub>2</sub>CH<sub>3</sub>), 21.2 (-CH<sub>2</sub>), 16.9 (-CH<sub>2</sub>CH<sub>3</sub>), 14.4 (-CHCH<sub>3</sub>); IR (film, cm<sup>-1</sup>) 3413, 2958, 2869, 1616, 1517; MS (EI)  $m/z$ : 203 (M<sup>+</sup>), 174 (11), 160 (65), 147 (21), 106 (100); HRMS (EI)  $m/z$  calcd for C<sub>14</sub>H<sub>21</sub>N(M<sup>+</sup>) 203.1674, found 203.1674; [ $\alpha$ ]<sub>D</sub><sup>20</sup> +5.9 (c 0.17, CHCl<sub>3</sub>); ee = 83% by GC-MS (EI) [chiral column: Cyclodex- $\beta$ ; conditions: T<sub>inj</sub> = 280 °C; T<sub>det</sub> = 280 °C; T<sub>initial</sub> = 30 °C for 3 min; T<sub>final</sub> = 200 °C; rate = 1 °/min; t<sub>R</sub> = 51.8 min (minor), t<sub>R</sub> = 53.1 min (major)].

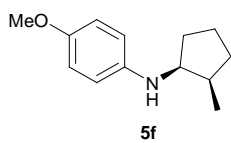

***cis*-N-(4-methoxyphenyl)-2-methylcyclopentaneamine (5f)**. Prepared according to the general procedure from 2-methylcyclopentanone (106  $\mu$ L, 1.0 mmol), *p*-anisidine (160 mg, 1.3 mmol) and Pd[(*R*)-BINAP]Br<sub>2</sub>, **1c**, (22 mg, 0.025 mmol) at

80 °C for 24 h, to provide the title compound as yellow oil (78%). <sup>1</sup>H NMR (300 MHz, CDCl<sub>3</sub>)  $\delta$  6.76 (d, 2H,  $J$  = 8.8 Hz, ArH), 6.60 (d, 2H,  $J$  = 8.8 Hz, ArH), 3.74 (s, 4H, -OMe), 3.66 (m, 1H, -NHCH), 3.21 (bs, 1H, -NHCH), 2.30-2.21 (m, 1H, -CHCH<sub>3</sub>), 1.99-1.34 (m, 6H, -CH<sub>2</sub>), 0.88 (d, 3H,  $J$  = 6.9 Hz, -CHCH<sub>3</sub>); <sup>13</sup>C NMR (75 MHz, CDCl<sub>3</sub>)  $\delta$  142.3, 114.9, 114.4, 111.7, 58.3 (-NHCH), 55.9 (-OCH<sub>3</sub>), 35.7 (-CHCH<sub>3</sub>), 32.0 (-CH<sub>2</sub>), 31.3 (-CH<sub>2</sub>), 21.2 (-CH<sub>2</sub>), 14.3 (-CHCH<sub>3</sub>); IR (film, cm<sup>-1</sup>) 3398, 2954, 2869, 1615, 1512; MS (EI)  $m/z$ : 205 (M<sup>+</sup>), 190 (10), 176 (18), 162 (100), 149 (38); HRMS (EI)  $m/z$  calcd for C<sub>13</sub>H<sub>19</sub>NO(M<sup>+</sup>) 205.1473, found 205.1467; [ $\alpha$ ]<sub>D</sub><sup>20</sup> +8.4 (c 0.5, CHCl<sub>3</sub>); ee = 96% by GC-MS (EI) [chiral column: Cyclodex- $\beta$ ; conditions: T<sub>inj</sub> = 280 °C; T<sub>det</sub> = 280 °C; T<sub>initial</sub> = 30 °C for 3 min; T<sub>final</sub> = 200 °C; rate = 1 °/min; t<sub>R</sub> = 54.6 min (minor), t<sub>R</sub> = 56.2 min (major)].

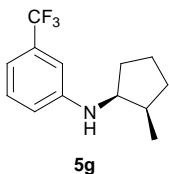

***cis-N-(3-trifluoromethylphenyl)-2-methylcyclopentaneamine (5g)***. Prepared according to the general procedure from 2-methylcyclopentanone (106  $\mu\text{L}$ , 1.0 mmol), *m*-trifluoromethylaniline (162  $\mu\text{L}$ , 1.3 mmol) and Pd[(*R*)-BINAP]Br<sub>2</sub>, **1c**, (22 mg, 0.025 mmol) at 80 °C for 24 h, to provide the title compound as colorless oil (80%).

<sup>1</sup>H NMR (300 MHz, CDCl<sub>3</sub>)  $\delta$  7.22 (t, 1H, *J* = 7.7 Hz, ArH), 6.88 (d, 1H, *J* = 7.7 Hz, ArH), 6.81 (s, 1H, ArH), 6.74 (dd, 1H, *J* = 2.0, 7.7 Hz, ArH), 3.90 (bs, 1H, -NHCH), 3.78-3.71 (m, 1H, -NHCH), 2.36-2.22 (m, 1H, -CHCH<sub>3</sub>), 2.05-1.38 (m, 6H, -CH<sub>2</sub>), 0.89 (d, 3H, *J* = 7.1 Hz, -CHCH<sub>3</sub>); <sup>13</sup>C NMR (75 MHz, CDCl<sub>3</sub>)  $\delta$  148.3, 131.5 (q, *J* = 31.3 Hz), 129.6, 124.5 (d, *J* = 272.2 Hz), 115.9, 113.1 (q, *J* = 3.6 Hz), 109.0 (q, *J* = 3.6 Hz), 57.2 (-NHCH), 35.8 (-CHCH<sub>3</sub>), 32.0 (-CH<sub>2</sub>), 31.5 (-CH<sub>2</sub>), 21.2 (-CH<sub>2</sub>), 14.4 (-CHCH<sub>3</sub>); IR (film, cm<sup>-1</sup>) 3436, 2960, 2873, 1615, 1517; MS (EI) *m/z*: 243 (M<sup>+</sup>), 214 (16), 200 (100), 187 (15); HRMS (EI) *m/z* calcd for C<sub>13</sub>H<sub>16</sub>NF<sub>3</sub>(M<sup>+</sup>) 243.1235, found 243.1239; [ $\alpha$ ]<sub>D</sub><sup>20</sup> +7.2 (c 0.58, CHCl<sub>3</sub>); ee = 98% by GC-MS (EI) [chiral column: Cyclodex- $\beta$ ; conditions: T<sub>inj</sub> = 280 °C; T<sub>det</sub> = 280 °C; T<sub>initial</sub> = 30 °C for 3 min; T<sub>final</sub> = 200 °C; rate = 1°/min; t<sub>R</sub> = 17.2 min (minor), t<sub>R</sub> = 17.6 min (major)].

With Pd[(*S*)-BINAP]Br<sub>2</sub>, **1d**, [ $\alpha$ ]<sub>D</sub><sup>20</sup> -10.9 (c 0.55, CHCl<sub>3</sub>).

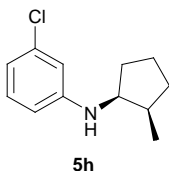

***cis-N-(3-chlorophenyl)-2-methylcyclopentaneamine (5h)***. Prepared according to the general procedure from 2-methylcyclopentanone (106  $\mu\text{L}$ , 1.0 mmol), *m*-chloroaniline (136  $\mu\text{L}$ , 1.3 mmol) and Pd[(*R*)-BINAP]Br<sub>2</sub>, **1c**, (22 mg, 0.025 mmol) at 80 °C for 24 h, to provide the title compound as colorless oil (86%).

<sup>1</sup>H NMR (300 MHz, CDCl<sub>3</sub>)  $\delta$  7.05 (t, 1H, *J* = 7.8 Hz, ArH), 6.63 (s, 1H, ArH), 6.60-6.58 (m, 1H, ArH), 6.47 (dd, 1H, *J* = 1.8, 7.8 Hz, ArH), 3.83 (bs, 1H, -NHCH), 3.73-3.66 (m, 1H, -NHCH), 2.35-2.21 (m, 1H, -CHCH<sub>3</sub>), 2.05-1.34 (m, 6H, -CH<sub>2</sub>), 0.88 (d, 3H, *J* = 7.2 Hz, -CHCH<sub>3</sub>); <sup>13</sup>C NMR (75 MHz, CDCl<sub>3</sub>)  $\delta$  149.1, 134.9, 130.0, 116.5, 112.4, 111.3, 57.1 (-NHCH), 35.6 (-CHCH<sub>3</sub>), 31.8 (-CH<sub>2</sub>), 31.4 (-CH<sub>2</sub>), 21.1 (-CH<sub>2</sub>), 14.3 (-CHCH<sub>3</sub>); IR (film, cm<sup>-1</sup>) 3423, 2957, 2870, 1598, 1501; MS (EI) *m/z*: 209 (M<sup>+</sup>), 180 (21), 166 (100), 153 (22); HRMS (EI) *m/z* calcd for C<sub>12</sub>H<sub>16</sub>NCl(M<sup>+</sup>) 209.0971, found 209.0969; [ $\alpha$ ]<sub>D</sub><sup>20</sup> +7.9 (c 0.58, CHCl<sub>3</sub>); ee = 91% by GC-MS (EI) [chiral column: Cyclodex- $\beta$ ; conditions: T<sub>inj</sub> = 280 °C; T<sub>det</sub> = 280 °C; T<sub>initial</sub> = 30 °C for 3 min; T<sub>final</sub> = 200 °C; rate = 1°/min; t<sub>R</sub> = 39.8 min (minor), t<sub>R</sub> = 41.0 min (major)].

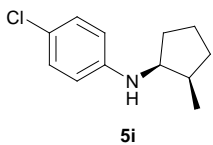

5i

***cis-N-(4-chlorophenyl)-2-methylcyclopentaneamine (5i)***. Prepared according to the general procedure from 2-methylcyclopentanone (106  $\mu\text{L}$ , 1.0 mmol), *p*-chloroaniline (165 mg, 1.3 mmol) and Pd[(*R*)-BINAP]Br<sub>2</sub>, **1c**, (22 mg, 0.025 mmol)

at 80 °C for 24 h, to provide the title compound as light yellow oil (88%). <sup>1</sup>H NMR (300 MHz, CDCl<sub>3</sub>)  $\delta$  7.09 (d, 2H, *J* = 8.7 Hz, ArH), 6.53 (d, 2H, *J* = 8.7 Hz, ArH), 3.90 (bs, 1H, -NHCH), 3.71-3.65 (m, 1H, -NHCH), 2.37-2.22 (m, 1H, -CHCH<sub>3</sub>), 2.03-1.34 (m, 6H, -CH<sub>2</sub>), 0.87 (d, 3H, *J* = 7.2 Hz, -CHCH<sub>3</sub>); <sup>13</sup>C NMR (75 MHz, CDCl<sub>3</sub>)  $\delta$  146.6, 128.9, 121.2, 114.0, 57.4 (-NHCH), 35.6 (-CHCH<sub>3</sub>), 31.9 (-CH<sub>2</sub>), 31.4 (-CH<sub>2</sub>), 21.1 (-CH<sub>2</sub>), 14.3 (-CHCH<sub>3</sub>); IR (film, cm<sup>-1</sup>) 3421, 2957, 2870, 1599, 1499; MS (EI) *m/z*: 209 (M<sup>+</sup>), 180 (16), 166 (100), 153 (27); HRMS (EI) *m/z* calcd for C<sub>12</sub>H<sub>16</sub>NCl(M<sup>+</sup>) 209.0971, found 209.0968; [ $\alpha$ ]<sub>D</sub><sup>20</sup> +10.4 (c 0.5, CHCl<sub>3</sub>); ee = 84% by GC-MS (EI) [chiral column: Cyclodex- $\beta$ ; conditions: T<sub>inj</sub> = 280 °C; T<sub>det</sub> = 280 °C; T<sub>initial</sub> = 30 °C for 3 min; T<sub>final</sub> = 200 °C; rate = 1°/min; t<sub>R</sub> = 32.3 min (minor), t<sub>R</sub> = 33.7 min (major)].

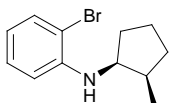

5j

***cis-N-(2-bromophenyl)-2-methylcyclopentaneamine (5j)***. Prepared according to the general procedure from 2-methylcyclopentanone (106  $\mu\text{L}$ , 1.0 mmol), *o*-bromoaniline (147  $\mu\text{L}$ , 1.3 mmol) and Pd[(*R*)-BINAP]Br<sub>2</sub>, **1c**, (22 mg, 0.025 mmol) at 80 °C for 24 h,

to provide the title compound as colorless oil (75%). <sup>1</sup>H NMR (300 MHz, CDCl<sub>3</sub>)  $\delta$  7.40 (d, 1H, *J* = 8.1 Hz, ArH), 7.15 (td, 1H, *J* = 1.5, 8.1 Hz, ArH), 6.70 (dd, 1H, *J* = 1.3, 8.2 Hz, ArH), 6.53 (td, 1H, *J* = 1.5, 8.0 Hz, ArH), 4.13 (bs, 1H, -NHCH), 3.80-3.73 (m, 1H, -NHCH), 2.37-2.21 (m, 1H, -CHCH<sub>3</sub>), 2.07-1.41 (m, 6H, -CH<sub>2</sub>), 0.93 (d, 3H, *J* = 6.9 Hz, -CHCH<sub>3</sub>); <sup>13</sup>C NMR (75 MHz, CDCl<sub>3</sub>)  $\delta$  144.6, 132.3, 128.3, 117.2, 112.0, 109.8, 57.4 (-NHCH), 35.9 (-CHCH<sub>3</sub>), 31.9 (-CH<sub>2</sub>), 31.5 (-CH<sub>2</sub>), 21.3 (-CH<sub>2</sub>), 14.4 (-CHCH<sub>3</sub>); IR (film, cm<sup>-1</sup>) 3423, 2957, 2870, 1598, 1501; MS (EI) *m/z*: 253 (M<sup>+</sup>), 224 (19), 210 (100), 197 (21); HRMS (EI) *m/z* calcd for C<sub>12</sub>H<sub>16</sub>NBr(M<sup>+</sup>) 253.0466, found 253.0467; [ $\alpha$ ]<sub>D</sub><sup>20</sup> -2.2 (c 0.23, CHCl<sub>3</sub>); ee = 18% by GC-MS (EI) [chiral column: Cyclodex- $\beta$ ; conditions: T<sub>inj</sub> = 280 °C; T<sub>det</sub> = 280 °C; T<sub>initial</sub> = 30 °C for 3 min; T<sub>final</sub> = 200 °C; rate = 1°/min; t<sub>R</sub> = 32.3 min (minor), t<sub>R</sub> = 32.5 min (major)].

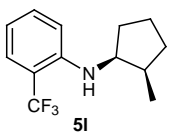

5l

***cis-N-(2-trifluoromethylphenyl)-2-methylcyclopentaneamine (5l)***. Prepared according to the general procedure from 2-methylcyclopentanone (106  $\mu\text{L}$ , 1.0 mmol), *o*-trifluoromethylaniline (163  $\mu\text{L}$ , 1.3 mmol) and Pd[(*R*)-BINAP]Br<sub>2</sub>, **1c**, (22 mg, 0.025

mmol) at 80 °C for 24 h, to provide the title compound as light yellow oil (69%). <sup>1</sup>H NMR (300 MHz, CDCl<sub>3</sub>)  $\delta$  7.37 (dd, 1H, *J* = 7.96, 1.20 Hz, ArH), 7.28 (t, 1H, *J* = 7.81 Hz, ArH), 6.84-6.76 (m, 2H, ArH), 3.90 (bs, 1H, -NHCH), 3.79-3.72 (m, 1H, -NHCH), 2.36-2.22 (m, 1H, -CHCH<sub>3</sub>), 2.05-1.38 (m,

6H, -CH<sub>2</sub>), 0.90 (d, 3H, *J* = 7.8 Hz, -CHCH<sub>3</sub>); IR (film, cm<sup>-1</sup>) 3440, 2960, 2877, 1615, 1516; MS (EI) *m/z*: 243 (M<sup>+</sup>), 214 (16), 200 (100); HRMS (EI) *m/z* calcd for C<sub>13</sub>H<sub>16</sub>NF<sub>3</sub>(M<sup>+</sup>) 243.1235, found 243.1239; ee = 95% by GC-MS (EI) [chiral column: Cyclodex-β; conditions: T<sub>inj</sub> = 280 °C; T<sub>det</sub> = 280 °C; T<sub>initial</sub> = 30 °C for 3 min; T<sub>final</sub> = 200 °C; rate = 1°/min; t<sub>R</sub> = 37.7 min (minor), t<sub>R</sub> = 38.2 min (major)].

### General procedure for asymmetric reductive amination of 2-methylcyclohexanone.

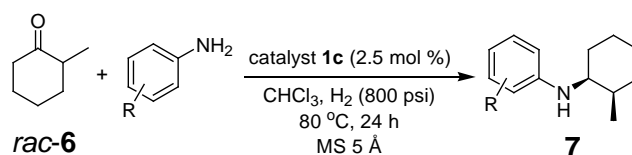

The procedure was the same as 2-methylcyclopentanone.

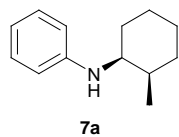

***cis*-N-(phenyl)-2-methylcyclohexaneamine (7a)**. Prepared according to the general procedure from 2-methylcyclohexanone (121 μL, 1.0 mmol), aniline (120 μL, 1.3 mmol) and Pd[(*R*)-BINAP]Br<sub>2</sub>, **1c**, (22 mg, 0.025 mmol) at 80 °C for 24 h, to provide the title compound as colorless oil (91%). <sup>1</sup>H NMR (300 MHz, CDCl<sub>3</sub>) δ 7.18-7.13 (m, 2H, ArH), 6.67-6.56 (m, 3H, ArH), 3.64 (bs, 1H, -NHCH), 3.52-3.47 (m, 1H, -NHCH), 2.06-1.98 (m, 1H, -CHCH<sub>3</sub>), 1.80-1.35 (m, 8H, -CH<sub>2</sub>), 0.92 (d, 3H, *J* = 6.9 Hz, -CHCH<sub>3</sub>); <sup>13</sup>C NMR (75 MHz, CDCl<sub>3</sub>) δ 147.6, 129.2, 116.5, 113.1, 53.1 (-NHCH), 33.0 (-CHCH<sub>3</sub>), 30.3 (-CH<sub>2</sub>), 28.5 (-CH<sub>2</sub>), 22.9 (-CH<sub>2</sub>), 22.7 (-CH<sub>2</sub>), 15.4 (-CHCH<sub>3</sub>); IR (film, cm<sup>-1</sup>) 3415, 2926, 2854, 1601, 1504; MS (EI) *m/z*: 189 (M<sup>+</sup>), 160 (4), 146 (27), 132 (100); HRMS (EI) *m/z* calcd for C<sub>13</sub>H<sub>19</sub>N(M<sup>+</sup>) 189.1517, found 189.1520; [α]<sub>D</sub><sup>20</sup> -13.3 (c 0.18, CHCl<sub>3</sub>); ee = 79% by GC-MS (EI) [chiral column: Cyclodex-β; conditions: t<sub>inj</sub> = 280°; t<sub>initial</sub> = 30° for 3 min; rate = 1.2°/min; t<sub>R</sub> = 39.3 min (minor), t<sub>R</sub> = 40.3 min (major)]. The relative stereochemistry of the product was assigned by comparison of <sup>1</sup>H NMR spectral data reported in the literatur for non chiral compound.<sup>5</sup>

With Pd[(*R*)-Tol-BINAP]Br<sub>2</sub>, **1e**, [α]<sub>D</sub><sup>20</sup> -11.5 (c 0.53, CHCl<sub>3</sub>); ee = 73% by GC-MS (EI) [chiral column: Cyclodex-β; conditions T<sub>inj</sub> = 280 °C; T<sub>det</sub> = 280 °C; T<sub>initial</sub> = 30 °C for 3 min; T<sub>final</sub> = 200 °C; rate = 1.2°/min; t<sub>R</sub> = 39.4 min (minor), t<sub>R</sub> = 40.3 min (major)].



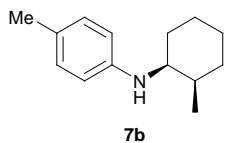

***cis-N-(4-methylphenyl)-2-methylcyclohexaneamine (7b)***. Prepared according to the general procedure from 2-methylcyclohexanone (121  $\mu\text{L}$ , 1.0 mmol), *p*-toluidine (139 mg, 1.3 mmol) and Pd[(*S*)-BINAP]Br<sub>2</sub>, **1d**, (22 mg, 0.025 mmol) at

80 °C for 24 h, to provide the title compound as light yellow oil (91%). <sup>1</sup>H NMR (300 MHz, CDCl<sub>3</sub>)  $\delta$  6.98 (d, 2H, *J* = 8.2 Hz, ArH), 6.55 (d, 1H, *J* = 8.5 Hz, ArH), 3.49-3.38 (m, 2H, -NHCH + -NHCH), 2.24 (s, 3H, -CH<sub>3</sub>), 2.06-2.00 (m, 1H, -CHCH<sub>3</sub>), 1.80-1.35 (m, 8H, -CH<sub>2</sub>), 0.92 (d, 3H, *J* = 7.1 Hz, -CHCH<sub>3</sub>); <sup>13</sup>C NMR (75 MHz, CDCl<sub>3</sub>)  $\delta$  145.5, 129.8, 125.8, 113.4, 53.5 (-NHCH), 33.1 (-CHCH<sub>3</sub>), 30.5 (-CH<sub>2</sub>), 28.7 (-CH<sub>2</sub>), 23.0 (-2CH<sub>2</sub>), 20.4 (-CH<sub>3</sub>), 15.5 (-CHCH<sub>3</sub>); IR (film, cm<sup>-1</sup>) 3412, 2924, 2855, 1617, 1518; MS (EI) *m/z*: 203 (M<sup>+</sup>), 174 (9), 160 (22), 146 (100); HRMS (EI) *m/z* calcd for C<sub>14</sub>H<sub>21</sub>N(M<sup>+</sup>) 203.1670, found 203.1674; [ $\alpha$ ]<sub>D</sub><sup>20</sup> +7.6 (c 0.5, CHCl<sub>3</sub>); ee = 75% by GC-MS (EI) [chiral column: Cyclodex- $\beta$ ; conditions: T<sub>inj</sub> = 280 °C; T<sub>det</sub> = 280 °C; T<sub>initial</sub> = 30 °C for 3 min; T<sub>final</sub> = 200 °C; rate = 1.0°/min; t<sub>R</sub> = 138.6 min (minor), t<sub>R</sub> = 139.9 min (major)].

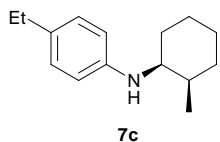

***cis-N-(4-ethylphenyl)-2-methylcyclohexaneamine (7c)***. Prepared according to the general procedure from 2-methylcyclohexanone (121  $\mu\text{L}$ , 1.0 mmol), *p*-ethylaniline (160  $\mu\text{L}$ , 1.3 mmol) and Pd[(*R*)-BINAP]Br<sub>2</sub>, **1c**, (22 mg, 0.025 mmol) at 80 °C for

24 h, to provide the title compound as yellow oil (74%). <sup>1</sup>H NMR (300 MHz, CDCl<sub>3</sub>)  $\delta$  7.02 (d, 2H, *J* = 8.4 Hz, ArH), 6.58 (d, 1H, *J* = 8.7 Hz, ArH), 3.51-3.47 (m, 2H, -NHCH + -NHCH), 2.56 (q, 2H, *J* = 7.6 Hz, -CH<sub>2</sub>CH<sub>3</sub>), 2.08-1.99 (m, 1H, -CHCH<sub>3</sub>), 1.80-1.31 (m, 8H, -CH<sub>2</sub>), 1.2 (t, 3H, *J* = 7.5 Hz, -CH<sub>2</sub>CH<sub>3</sub>), 0.94 (d, 3H, *J* = 6.9 Hz, -CHCH<sub>3</sub>); <sup>13</sup>C NMR (75 MHz, CDCl<sub>3</sub>)  $\delta$  145.6, 132.4, 128.5, 113.2, 53.4 (-NHCH), 33.1 (-CHCH<sub>3</sub>), 30.3 (-CH<sub>2</sub>), 28.6 (-CH<sub>2</sub>), 27.8 (-CH<sub>2</sub>CH<sub>3</sub>), 22.9 (-CH<sub>2</sub>), 22.7 (-CH<sub>2</sub>), 15.8 (-CH<sub>2</sub>CH<sub>3</sub>), 15.5 (-CHCH<sub>3</sub>); IR (film, cm<sup>-1</sup>) 3418, 2926, 2855, 1615, 1517; MS (EI) *m/z*: 217 (M<sup>+</sup>), 188 (5), 174 (29), 160 (100); HRMS (EI) *m/z* calcd for C<sub>15</sub>H<sub>23</sub>N(M<sup>+</sup>) 217.1830, found 217.1832; [ $\alpha$ ]<sub>D</sub><sup>20</sup> -8.8 (c 0.42, CHCl<sub>3</sub>); ee = 62% by GC-MS (EI) [chiral column: Cyclodex- $\beta$ ; conditions: t<sub>inj</sub> = 280°; t<sub>initial</sub> = 30° for 3 min; rate = 1.2°/min; t<sub>R</sub> = 49.8 min (minor), t<sub>R</sub> = 51.4 min (major)].

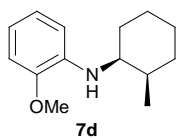

***cis-N-(2-methoxyphenyl)-2-methylcyclohexaneamine (7d)***. Prepared according to the general procedure from 2-methylcyclohexanone (121  $\mu\text{L}$ , 1.0 mmol), *o*-anisidine (150  $\mu\text{L}$ , 1.3 mmol) and Pd[(*R*)-BINAP]Br<sub>2</sub>, **1c**, (22 mg, 0.025 mmol) at 80 °C for 24

h, to provide the title compound as colorless oil (83%). <sup>1</sup>H NMR (300 MHz, CDCl<sub>3</sub>)  $\delta$  6.87 (td, 1H, *J* = 1.3, 7.15 Hz, ArH), 6.79 (d, 1H, *J* = 7.7 Hz, ArH), 6.66-6.61 (m, 2H, ArH), 4.34 (bs, 1H, -NHCH), 3.87 (s, 3H, -OMe), 3.55-3.51 (m, 1H, -NHCH), 2.10-2.00 (m, 1H, -CHCH<sub>3</sub>), 1.76-1.38 (m, 8H, -CH<sub>2</sub>), 0.95 (d, 3H, *J* = 6.8 Hz, -CHCH<sub>3</sub>); <sup>13</sup>C NMR (75 MHz, CDCl<sub>3</sub>)  $\delta$  146.9, 137.8, 121.3, 115.5, 110.2,

109.6, 55.6 (-OCH<sub>3</sub>), 53.0 (-NHCH), 33.3 (-CHCH<sub>3</sub>), 30.5 (-CH<sub>2</sub>), 28.8 (-CH<sub>2</sub>), 23.2 (-CH<sub>2</sub>), 22.9 (-CH<sub>2</sub>), 15.7 (-CHCH<sub>3</sub>); IR (film, cm<sup>-1</sup>) 3421, 2926, 2855, 1594, 1498; MS (EI) *m/z*: 219 (M<sup>+</sup>), 190 (4), 176 (28), 162 (100); HRMS (EI) *m/z* calcd for C<sub>14</sub>H<sub>21</sub>NO(M<sup>+</sup>) 219.1623, found 219.1619; [α]<sup>20</sup><sub>D</sub> -7.8 (c 0.54, CHCl<sub>3</sub>); ee = 98% by GC-MS (EI) [chiral column: Cyclodex-β; conditions: T<sub>inj</sub> = 280 °C; T<sub>det</sub> = 280 °C; T<sub>initial</sub> = 30 °C for 3 min; T<sub>final</sub> = 200 °C; rate = 1.0°/min; t<sub>R</sub> = 156.1 min (minor), t<sub>R</sub> = 157.5 min (major)].

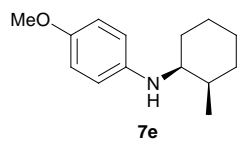

***cis*-N-(4-methoxyphenyl)-2-methylcyclohexaneamine (7e)**. Prepared according to the general procedure from 2-methylcyclohexanone (121 μL, 1.0 mmol), *p*-anisidine (160 mg, 1.3 mmol) and Pd[(*R*)-BINAP]Br<sub>2</sub>, **1c**, (22 mg, 0.025 mmol) at

80 °C for 24 h, to provide the title compound as light yellow oil (85%). <sup>1</sup>H NMR (300 MHz, CDCl<sub>3</sub>) δ 6.76 (d, 2H, *J* = 8.7 Hz, ArH), 6.58 (d, 2H, *J* = 8.7 Hz, ArH), 4.14 (bs, 1H, -NHCH), 3.74 (s, 3H, -OMe), 3.43-3.38 (m, 1H, -NHCH), 2.06-1.97 (m, 1H, -CHCH<sub>3</sub>), 1.65-1.35 (m, 8H, -CH<sub>2</sub>), 0.91 (d, 3H, *J* = 7.2 Hz, -CHCH<sub>3</sub>); <sup>13</sup>C NMR (75 MHz, CDCl<sub>3</sub>) δ 151.6, 141.9, 114.9, 114.6, 55.8 (-OCH<sub>3</sub>), 54.2 (-NHCH), 33.0 (-CHCH<sub>3</sub>), 30.4 (-CH<sub>2</sub>), 28.5 (-CH<sub>2</sub>), 22.9 (-CH<sub>2</sub>), 22.8 (-CH<sub>2</sub>), 15.2 (-CHCH<sub>3</sub>); IR (film, cm<sup>-1</sup>) 3393, 2925, 2853, 1617, 1512; MS (EI) *m/z*: 219 (M<sup>+</sup>), 190 (4), 176 (22), 162 (100); HRMS (EI) *m/z* calcd for C<sub>14</sub>H<sub>21</sub>NO(M<sup>+</sup>) 219.1623, found 219.1625; [α]<sup>20</sup><sub>D</sub> -9.3 (c 0.4, CHCl<sub>3</sub>); ee = >99% by GC-MS (EI) [chiral column: Cyclodex-β; conditions: T<sub>inj</sub> = 280 °C; T<sub>det</sub> = 280 °C; T<sub>initial</sub> = 30 °C for 3 min; T<sub>final</sub> = 200 °C; rate = 1.0°/min; t<sub>R</sub> = 143.8 min (minor), t<sub>R</sub> = 144.9 min (major)].

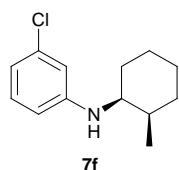

***cis*-N-(3-chlorophenyl)-2-methylcyclohexaneamine (7f)**. Prepared according to the general procedure from 2-methylcyclohexanone (121 μL, 1.0 mmol), *m*-chloroaniline (136 μL, 1.3 mmol) and Pd[(*R*)-BINAP]Br<sub>2</sub>, **1c**, (22 mg, 0.025 mmol) at 80 °C for 24

h, to provide the title compound as colorless oil (90%). <sup>1</sup>H NMR (300 MHz, CDCl<sub>3</sub>) δ 7.07-7.00 (m, 1H, ArH), 6.62-6.57 (m, 2H, ArH), 6.46 (dd, 1H, *J* = 1.0, 8.3 Hz ArH), 3.70 (bs, 1H, -NHCH), 3.48-3.44 (m, 1H, -NHCH), 2.04-1.96 (m, 1H, -CHCH<sub>3</sub>), 1.83-1.35 (m, 8H, -CH<sub>2</sub>), 0.91 (d, 3H, *J* = 6.6 Hz, -CHCH<sub>3</sub>); <sup>13</sup>C NMR (75 MHz, CDCl<sub>3</sub>) δ 148.8, 134.9, 130.0, 116.2, 112.4, 111.3, 53.0 (-NHCH), 32.9 (-CHCH<sub>3</sub>), 30.2 (-CH<sub>2</sub>), 28.5 (-CH<sub>2</sub>), 22.9 (-CH<sub>2</sub>), 22.6 (-CH<sub>2</sub>), 15.6 (-CHCH<sub>3</sub>); IR (film, cm<sup>-1</sup>) 3425, 2927, 2855, 1597, 1502; MS (EI) *m/z*: 223 (M<sup>+</sup>), 194 (5), 180 (32), 166 (100); HRMS (EI) *m/z* calcd for C<sub>13</sub>H<sub>18</sub>NCl(M<sup>+</sup>) 223.1128, found 223.1123; [α]<sup>20</sup><sub>D</sub> -9.5 (c 0.46, CHCl<sub>3</sub>); ee = 93% by GC-MS (EI) [chiral column: Cyclodex-β; conditions: T<sub>inj</sub> = 280 °C; T<sub>det</sub> = 280 °C; T<sub>initial</sub> = 30 °C for 3 min; T<sub>final</sub> = 200 °C; rate = 1.2°/min; t<sub>R</sub> = 28.4 min (minor), t<sub>R</sub> = 29.7 min (major)].

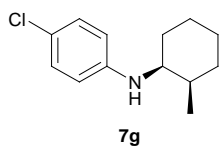

7g

***cis-N-(4-chlorophenyl)-2-methylcyclohexaneamine (7g)***. Prepared according to the general procedure from 2-methylcyclohexanone (121  $\mu$ L, 1.0 mmol), *p*-chloroaniline (165 mg, 1.3 mmol) and Pd[(*R*)-BINAP]Br<sub>2</sub>, **1c**, (22 mg, 0.025 mmol)

at 80 °C for 24 h, to provide the title compound as colorless oil (82%). <sup>1</sup>H NMR (300 MHz, CDCl<sub>3</sub>)  $\delta$  7.09 (d, 2H, *J* = 8.8 Hz, ArH), 6.51 (d, 2H, *J* = 8.8 Hz, ArH), 3.59 (bs, 1H, -NHCH), 3.46-3.41 (m, 1H, -NHCH), 2.04-1.97 (m, 1H, -CHCH<sub>3</sub>), 1.75-1.36 (m, 8H, -CH<sub>2</sub>), 0.90 (d, 3H, *J* = 7.2 Hz, -CHCH<sub>3</sub>); <sup>13</sup>C NMR (75 MHz, CDCl<sub>3</sub>)  $\delta$  146.4, 129.1, 121.0, 114.2, 53.4 (-NHCH), 33.1 (-CHCH<sub>3</sub>), 30.3 (-CH<sub>2</sub>), 28.6 (-CH<sub>2</sub>), 23.0 (-CH<sub>2</sub>), 22.8 (-CH<sub>2</sub>), 15.5 (-CHCH<sub>3</sub>); IR (film, cm<sup>-1</sup>) 3423, 2927, 2856, 1599, 1500; MS (EI) *m/z*: 223 (M<sup>+</sup>), 194 (6), 180 (37), 166 (100); HRMS (EI) *m/z* calcd for C<sub>13</sub>H<sub>18</sub>NCl(M<sup>+</sup>) 223.1128, found 223.1135; [ $\alpha$ ]<sub>D</sub><sup>20</sup> -6.4 (c 0.5, CHCl<sub>3</sub>); ee = 89% by GC-MS (EI) [chiral column: Cyclodex- $\beta$ ; conditions: T<sub>inj</sub> = 280 °C; T<sub>det</sub> = 280 °C; T<sub>initial</sub> = 30 °C for 3 min; T<sub>final</sub> = 200 °C; rate = 1.0°/min; t<sub>R</sub> = 157.1 min (minor), t<sub>R</sub> = 157.8 min (major)].

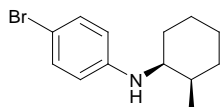

7h

***cis-N-(4-bromophenyl)-2-methylcyclohexaneamine (7h)***. Prepared according to the general procedure from 2-methylcyclohexanone (121  $\mu$ L, 1.0 mmol), *p*-bromoaniline (222 mg, 1.3 mmol) and Pd[(*S*)-BINAP]Br<sub>2</sub>, **1d**, (22 mg, 0.025 mmol)

at 80 °C for 24 h, to provide the title compound as colorless oil (71%). <sup>1</sup>H NMR (300 MHz, CDCl<sub>3</sub>)  $\delta$  7.21 (d, 2H, *J* = 8.8 Hz, ArH), 6.48 (d, 2H, *J* = 8.8 Hz, ArH), 3.67 (bs, 1H, -NHCH), 3.46-3.41 (m, 1H, -NHCH), 2.02-1.97 (m, 1H, -CHCH<sub>3</sub>), 1.77-1.22 (m, 8H, -CH<sub>2</sub>), 0.90 (d, 3H, *J* = 7.2 Hz, -CHCH<sub>3</sub>); <sup>13</sup>C NMR (75 MHz, CDCl<sub>3</sub>)  $\delta$  146.8, 132.0, 114.7, 108.0, 53.4 (-NHCH), 33.0 (-CHCH<sub>3</sub>), 30.3 (-CH<sub>2</sub>), 28.6 (-CH<sub>2</sub>), 23.0 (-CH<sub>2</sub>), 22.8 (-CH<sub>2</sub>), 15.5 (-CHCH<sub>3</sub>); IR (film, cm<sup>-1</sup>) 3434, 2926, 2854, 1600, 1515; MS (EI) *m/z*: 267 (M<sup>+</sup>), 240 (2), 226 (19), 212 (100); HRMS (EI) *m/z* calcd for C<sub>13</sub>H<sub>18</sub>NBr(M<sup>+</sup>) 267.0623, found 267.0631; [ $\alpha$ ]<sub>D</sub><sup>20</sup> +6.5 (c 0.52, CHCl<sub>3</sub>); ee = 83% by GC-MS (EI) [chiral column: Cyclodex- $\beta$ ; conditions: T<sub>inj</sub> = 280 °C; T<sub>det</sub> = 280 °C; T<sub>initial</sub> = 30 °C for 3 min; T<sub>final</sub> = 200 °C; rate = 1.0°/min; t<sub>R</sub> = 167.3 min (minor), t<sub>R</sub> = 168.0 min (major)].

### General procedure for asymmetric reductive amination of (*R*)-3-methylcyclohexanone.

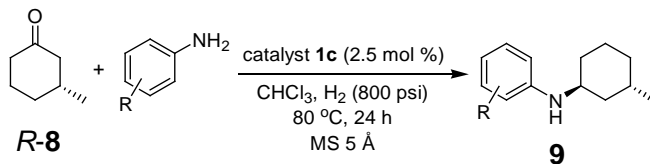

The procedure was the same as 2-methylcyclopentanone.

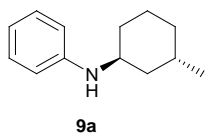

***trans*-N-(phenyl)-3-methylcyclohexaneamine (9a)**. Prepared according to the general procedure from (*R*)-(+)-3-methylcyclohexanone (122  $\mu$ L, 1.0 mmol), aniline (120  $\mu$ L, 1.3 mmol) and Pd[(*S*)-BINAP]Br<sub>2</sub>, **1d**, (22 mg, 0.025 mmol) at 80 °C for 24

h, to provide the title compound as colorless oil (87%). <sup>1</sup>H NMR (500 MHz, CDCl<sub>3</sub>)  $\delta$  7.17-7.14 (m, 2H, ArH), 6.68 (t, 1H, *J* = 7.2 Hz, ArH), 6.63 (d, 2H, *J* = 8.0 Hz, ArH), 4.21 (bs, 1H, -NHCH), 3.68-3.64 (m, 1H, -NHCH), 1.78-1.50 (m, 7H, -CHCH<sub>3</sub> + -CH<sub>2</sub>), 1.38-1.33 (m, 1H, -CH<sub>2</sub>), 1.09-1.01 (m, 1H, -CH<sub>2</sub>), 0.91 (d, 3H, *J* = 6.5 Hz, -CHCH<sub>3</sub>); <sup>13</sup>C NMR (125 MHz, CDCl<sub>3</sub>)  $\delta$  146.8, 129.2, 117.2, 113.6, 48.1 (-NHCH), 38.6 (-CH<sub>2</sub>), 33.8 (-CH<sub>2</sub>), 30.3 (-CH<sub>2</sub>), 27.1 (-CHCH<sub>3</sub>), 21.5 (-CHCH<sub>3</sub>), 20.5 (-CH<sub>2</sub>); IR (film, cm<sup>-1</sup>) 3415, 2923, 2850, 1602, 1504; MS (EI) *m/z*: 189 (M<sup>+</sup>), 174 (8), 160 (5), 146 (100), 132 (87); HRMS (EI) *m/z* calcd for C<sub>13</sub>H<sub>19</sub>N(M<sup>+</sup>) 189.1517, found 189.1514; [ $\alpha$ ]<sub>D</sub><sup>20</sup> -13.3 (c 0.48, CHCl<sub>3</sub>); ee = 91% by GC-MS (EI) [chiral column: Cyclodex- $\beta$ ; conditions: T<sub>inj</sub> = 280 °C; T<sub>det</sub> = 280 °C; T<sub>initial</sub> = 30 °C for 3 min; T<sub>final</sub> = 200 °C; rate = 1<sup>o</sup>/min; t<sub>R</sub> = 132.7 min (major), t<sub>R</sub> = 133.2 min (minor)].

The relative configuration was confirmed by NOE experiment and compared with a similar reported compound.<sup>6</sup>

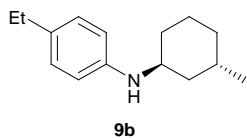

***trans*-N-(*p*-ethylphenyl)-3-methylcyclohexaneamine (9b)**. Prepared according to the general procedure from (*R*)-(+)-3-methylcyclohexanone (122  $\mu$ L, 1.0 mmol), *p*-ethylaniline (160  $\mu$ L, 1.3 mmol) and Pd[(*S*)-BINAP]Br<sub>2</sub>, **1e**, (22 mg,

0.025 mmol) at 80 °C for 24 h, to provide the title compound as light yellow oil (90%). <sup>1</sup>H NMR (500 MHz, CDCl<sub>3</sub>)  $\delta$  6.99 (d, 2H, *J* = 8.5 Hz, ArH), 6.54 (d, 2H, *J* = 8.5 Hz, ArH), 4.02 (bs, 1H, -NHCH), 3.65-3.62 (m, 1H, -NHCH), 2.52 (q, 2H, *J* = 7.5 Hz, -CH<sub>2</sub>CH<sub>3</sub>), 1.76-1.49 (m, 7H, -CHCH<sub>3</sub> + -CH<sub>2</sub>), 1.36-1.30 (m, 1H, -CH<sub>2</sub>), 1.18 (t, 3H, *J* = 7.5 Hz, -CH<sub>2</sub>CH<sub>3</sub>), 1.07-1.00 (m, 1H, -CH<sub>2</sub>), 0.90 (d, 3H, *J* = 6.5 Hz, -CHCH<sub>3</sub>); <sup>13</sup>C NMR (125 MHz, CDCl<sub>3</sub>)  $\delta$  145.3, 132.6, 128.5, 113.2, 47.8 (-NHCH), 38.9 (-CH<sub>2</sub>), 33.9 (-CH<sub>2</sub>), 30.5 (-CH<sub>2</sub>), 27.8 (-CH<sub>2</sub>CH<sub>3</sub>), 27.1 (-CHCH<sub>3</sub>), 21.6 (-CHCH<sub>3</sub>), 20.5 (-CH<sub>2</sub>), 15.8 (-CH<sub>2</sub>CH<sub>3</sub>); IR (film, cm<sup>-1</sup>) 3411, 2924, 2864, 1615, 1517; MS (EI) *m/z*: 217 (M<sup>+</sup>), 202 (9), 173 (3), 160 (100), 146 (82); HRMS (EI) *m/z* calcd for C<sub>15</sub>H<sub>23</sub>N(M<sup>+</sup>) 217.1830, found 217.1829; [ $\alpha$ ]<sub>D</sub><sup>20</sup> -8.4 (c 0.5, CHCl<sub>3</sub>); ee = 95% by GC-MS (EI) [chiral column: Cyclodex- $\beta$ ; conditions: T<sub>inj</sub> = 280 °C; T<sub>det</sub> = 280 °C; T<sub>initial</sub> = 30 °C for 3 min; T<sub>final</sub> = 200 °C; rate = 1<sup>o</sup>/min; t<sub>R</sub> = 149.8 min (major), t<sub>R</sub> = 150.5 min (minor)].

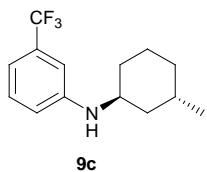

***trans*-N-(3-trifluoromethylphenyl)-3-methylcyclohexaneamine (9c).** Prepared according to the general procedure from (*R*)-(+)-3-methylcyclohexanone (122  $\mu$ L, 1.0 mmol), *m*-trifluoromethyl aniline (162  $\mu$ L, 1.3 mmol) and Pd[(*S*)-BINAP]Br<sub>2</sub>, **1d**, (22 mg, 0.025 mmol) at 80 °C for 24 h, to provide the title compound as colorless

oil (84%). <sup>1</sup>H NMR (500 MHz, CDCl<sub>3</sub>)  $\delta$  7.21 (t, 1H, *J* = 8.0 Hz, ArH), 6.87 (d, 1H, *J* = 7.5 Hz, ArH), 6.77 (s, 1H, ArH), 6.70 (d, 1H, *J* = 8.0 Hz, ArH), 4.06 (bs, 1H, -NHCH), 3.70-3.66 (m, 1H, -NHCH), 1.76-1.45 (m, 7H, -CHCH<sub>3</sub> + -CH<sub>2</sub>), 1.38-1.32 (m, 1H, -CH<sub>2</sub>), 1.09-1.01 (m, 1H, -CH<sub>2</sub>), 0.92 (d, 3H, *J* = 7.0 Hz, -CHCH<sub>3</sub>); <sup>13</sup>C NMR (125 MHz, CDCl<sub>3</sub>)  $\delta$  147.4, 131.6 (q, *J* = 31.4 Hz), 129.6, 124.6 (d, *J* = 271.0 Hz), 115.9, 113.1 (q, *J* = 3.7 Hz), 109.1 (q, *J* = 3.8 Hz), 47.6 (-NHCH), 38.6 (-CH<sub>2</sub>), 33.8 (-CH<sub>2</sub>), 30.2 (-CH<sub>2</sub>), 27.1 (-CHCH<sub>3</sub>), 21.6 (-CHCH<sub>3</sub>), 20.4 (-CH<sub>2</sub>); IR (film, cm<sup>-1</sup>) 3443, 2926, 2857, 1614, 1515; MS (EI) *m/z*: 257 (M<sup>+</sup>), 242 (7), 214 (100), 228 (2), 200 (74); HRMS (EI) *m/z* calcd for C<sub>14</sub>H<sub>18</sub>NF<sub>3</sub>(M<sup>+</sup>) 257.1391, found 257.1389; [ $\alpha$ ]<sub>D</sub><sup>20</sup> -13.1 (c 0.48, CHCl<sub>3</sub>); ee = >99% by GC-MS (EI) [chiral column: Cyclodex- $\beta$ ; conditions: T<sub>inj</sub> = 280 °C; T<sub>det</sub> = 280 °C; T<sub>initial</sub> = 30 °C for 3 min; T<sub>final</sub> = 200 °C; rate = 1°/min; t<sub>R</sub> = 135.8 min (major)].

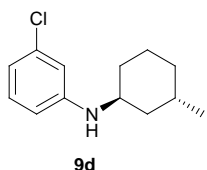

***trans*-N-(3-chlorophenyl)-3-methylcyclohexaneamine (9d).** Prepared according to the general procedure from (*R*)-(+)-3-methylcyclohexanone (122  $\mu$ L, 1.0 mmol), *m*-chloroaniline (136  $\mu$ L, 1.3 mmol) and Pd[(*S*)-BINAP]Br<sub>2</sub>, **1d**, (22 mg, 0.025 mmol) at 80 °C for 24 h, to provide the title compound as colorless oil (89%). <sup>1</sup>H NMR (500

MHz, CDCl<sub>3</sub>)  $\delta$  7.02 (t, 1H, *J* = 8.2 Hz, ArH), 6.62 (d, 1H, *J* = 8.0 Hz, ArH), 6.54 (s, 1H, ArH), 6.43 (d, 1H, *J* = 8.5 Hz, ArH), 3.90 (bs, 1H, -NHCH), 3.63-3.60 (m, 1H, -NHCH), 1.72-1.43 (m, 7H, -CHCH<sub>3</sub> + -CH<sub>2</sub>), 1.35-1.29 (m, 1H, -CH<sub>2</sub>), 1.07-0.99 (m, 1H, -CH<sub>2</sub>), 0.91 (d, 3H, *J* = 6.5 Hz, -CHCH<sub>3</sub>); <sup>13</sup>C NMR (125 MHz, CDCl<sub>3</sub>)  $\delta$  148.4, 135.0, 130.1, 116.5, 112.5, 111.3, 47.6 (-NHCH), 38.6 (-CH<sub>2</sub>), 33.8 (-CH<sub>2</sub>), 30.2 (-CH<sub>2</sub>), 27.1 (-CHCH<sub>3</sub>), 21.5 (-CHCH<sub>3</sub>), 20.4 (-CH<sub>2</sub>); IR (film, cm<sup>-1</sup>) 3425, 2924, 2861, 1598, 1500; MS (EI) *m/z*: 223 (M<sup>+</sup>), 208 (7), 180 (100), 166 (73), 153 (17); HRMS (EI) *m/z* calcd for C<sub>13</sub>H<sub>18</sub>NCl(M<sup>+</sup>) 223.1128, found 223.1125; [ $\alpha$ ]<sub>D</sub><sup>20</sup> -12.7 (c 0.47, CHCl<sub>3</sub>); [ $\alpha$ ]<sub>D</sub><sup>20</sup> -20.3 (c 0.52, benzene); ee = >99% by GC-MS (EI) [chiral column: Cyclodex- $\beta$ ; conditions: T<sub>inj</sub> = 280 °C; T<sub>det</sub> = 280 °C; T<sub>initial</sub> = 30 °C for 3 min; T<sub>final</sub> = 200 °C; rate = 1°/min; t<sub>R</sub> = 189.4 min (major)].

### General procedure for asymmetric reductive amination of other substituted rings.

The procedure was the same as 2-methylcyclopentanone.

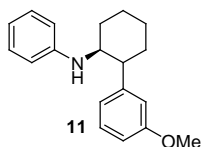

***cis-N-[2-(3-methoxyphenyl)cyclohexyl]benzenamine (11)***. Prepared according to the general procedure from 2-(3-methoxyphenyl)cyclohexanone (185  $\mu\text{L}$ , 1.0 mmol), aniline (120  $\mu\text{L}$ , 1.3 mmol) and Pd[(*R*)-BINAP]Br<sub>2</sub>, **1c**, (22 mg, 0.025 mmol) at 80

$^{\circ}\text{C}$  for 24 h, to provide the title compound as light yellow oil (77%).  $^1\text{H}$  NMR (500 MHz, CDCl<sub>3</sub>)  $\delta$  7.16 (t, 1H,  $J = 7.5$  Hz, ArH), 7.03 (dd, 2H,  $J = 8.5$  Hz, ArH), 6.84 (dt, 1H,  $J = 8.5, 1.0$  Hz, ArH), 6.80 (t, 1H,  $J = 8.5$  Hz, ArH), 6.68 (dd, 1H,  $J = 8.0, 2.5$  Hz, ArH), 6.56 (tt, 1H,  $J = 7.5, 1.0$  Hz, ArH), 6.41 (d, 2H,  $J = 8.0$  Hz, ArH), 3.82-3.79 (m, 1H, -NHCH), 3.70 (s, 3H, -OMe), 3.66 (bs, 1H, -NHCH), 2.98-2.92 (ddd, 1H,  $J = 11.5, 4.0, 4.0$  Hz, -CHArH), 2.12-2.08 (m, 1H, -CH<sub>2</sub>), 1.92-1.82 (m, 3H, -CH<sub>2</sub>), 1.61-1.42 (m, 4H, -CH<sub>2</sub>);  $^{13}\text{C}$  NMR (125 MHz, CDCl<sub>3</sub>)  $\delta$  159.5, 147.8, 145.4, 129.1, 128.9, 119.9, 116.6, 113.7, 113.2, 111.3, 55.0 (-OMe), 53.2 (-NHCH), 46.1 (-CHArH), 30.1 (-CH<sub>2</sub>), 25.87 (-CH<sub>2</sub>), 25.83 (-CH<sub>2</sub>), 20.3 (-CH<sub>2</sub>); IR (film, cm<sup>-1</sup>) 3424, 2926, 2861, 1598, 1502; MS (EI)  $m/z$ : 281 (M<sup>+</sup>), 252 (3), 238 (18), 224 (3), 159 (19), 132 (100); HRMS (EI)  $m/z$  calcd for C<sub>19</sub>H<sub>23</sub>ON (M<sup>+</sup>) 281.1780, found 281.1784;  $[\alpha]_{\text{D}}^{20}$  -36.6 (c 0.21, CHCl<sub>3</sub>); ee = 80% by GC-MS (EI) [chiral column: Cyclodex- $\beta$ ; conditions: T<sub>inj</sub> = 280  $^{\circ}\text{C}$ ; T<sub>det</sub> = 280  $^{\circ}\text{C}$ ; T<sub>initial</sub> = 30  $^{\circ}\text{C}$  for 3 min; T<sub>final</sub> = 200  $^{\circ}\text{C}$ ; rate = 1 $^{\circ}$ /min; t<sub>R</sub> = 147.0 min (minor), t<sub>R</sub> = 148.4 min (major)].

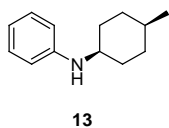

***cis-N-(4-methylcyclohexyl)aniline (13)***. Prepared according to the general procedure from 4-methylcyclohexanone (123  $\mu\text{L}$ , 1.0 mmol), aniline (120  $\mu\text{L}$ , 1.3 mmol) and Pd[(*R*)-BINAP]Br<sub>2</sub>, **1c**, (22 mg, 0.025 mmol) at 80  $^{\circ}\text{C}$  for 24 h, to provide the title

compound as light yellow oil (74%).  $^1\text{H}$  NMR (500 MHz, CDCl<sub>3</sub>)  $\delta$  7.15 (dd, 2H,  $J = 8.5$  Hz, ArH), 6.65 (t, 1H,  $J = 8.0$  Hz, ArH), 6.61-6.58 (m, 2H, ArH), 3.73 (bs, 1H, -NHCH), 3.56-3.52 (m, 1H, -NHCH), 1.77-1.72 (m, 2H, -CH<sub>2</sub>), 1.66-1.60 (m, 2H, -CH<sub>2</sub>), 1.57-1.51 (m, 3H, -CHCH<sub>3</sub>+ -CH<sub>2</sub>), 0.92 (d, 3H,  $J = 6.5$  Hz, -CHCH<sub>3</sub>);  $^{13}\text{C}$  NMR (125 MHz, CDCl<sub>3</sub>)  $\delta$  147.3, 129.2, 116.7, 113.1, 48.1 (-NHCH), 30.8 (-CHCH<sub>3</sub>), 29.7 (-2CH<sub>2</sub>), 29.2 (-2CH<sub>2</sub>), 21.3 (-CHCH<sub>3</sub>); IR (film, cm<sup>-1</sup>) 3425, 2924, 2860, 1601, 1514; MS (EI)  $m/z$ : 189 (M<sup>+</sup>), 157 (3), 144 (6), 132 (100), 118 (14), 106 (11); HRMS (EI)  $m/z$  calcd for C<sub>13</sub>H<sub>19</sub>N (M<sup>+</sup>) 189.1517, found 189.1515.

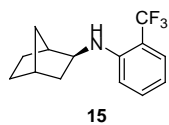

***N-(2-(trifluoromethyl)phenyl)bicyclo[2.2.1]heptan-2-amine (15)***. Prepared according to the general procedure from norcamphor (110 mg, 1.0 mmol), *o*-trifluoromethyl aniline (163  $\mu\text{L}$ , 1.3 mmol) and Pd[(*R*)-BINAP]Br<sub>2</sub>, **1c**, (22 mg, 0.025 mmol) at 80  $^{\circ}\text{C}$

for 24 h, to provide the title compound as colorless oil (74%).  $^1\text{H}$  NMR (500 MHz, CDCl<sub>3</sub>)  $\delta$  7.41 (d, 1H,  $J = 8.0$  Hz, ArH), 7.32 (t, 1H,  $J = 7.5$  Hz, ArH), 6.71 (d, 1H,  $J = 8.5$  Hz, ArH), 6.67 (t, 1H,  $J = 7.5$  Hz, ArH), 4.51 (bs, 1H, -NHCH), 3.76-3.73 (m, 1H, -NHCH), 2.55-2.53 (m, 1H, -CH), 2.32-2.26 (m,

1H, -CH), 2.20-2.14 (m, 1H, -CH<sub>2</sub>), 1.68-1.55 (m, 2H, -CH<sub>2</sub>), 1.50-1.47 (m, 1H, -CH<sub>2</sub>), 1.42-1.35 (m, 2H, -CH<sub>2</sub>), 1.30-1.16 (m, 1H, -CH<sub>2</sub>), 0.84-0.80 (m, 1H, -CH<sub>2</sub>) ; <sup>13</sup>C NMR (125 MHz, CDCl<sub>3</sub>) δ 145.6, 132.9, 126.8 (q, *J* = 5.3 Hz), 119.8 (d = 272.1 Hz), 115.3, 113.2 (q, *J* = 29.4 Hz), 112.6, 54.2 (-NHCH), 39.7 (-CH), 38.9 (-CH<sub>2</sub>), 38.1 (-CH<sub>2</sub>), 36.8 (-CH), 29.7 (-CH<sub>2</sub>), 21.2 (-CH<sub>2</sub>); IR (film, cm<sup>-1</sup>) 3476, 2956, 2873, 1615, 1519; MS (EI) *m/z*: 255 (M<sup>+</sup>, 100), 226 (23), 214 (12), 200 (29), 187 (57), 174 (21); HRMS (EI) *m/z* calcd for C<sub>14</sub>H<sub>16</sub>NF<sub>3</sub>(M<sup>+</sup>) 255.1235, found 235.1239; [α]<sub>D</sub><sup>20</sup> -15.7 (c 0.50, CHCl<sub>3</sub>); ee = 87% by HPLC (Daicel Chiracel OD-H, eluent hexane-iPrOH = 99 1, flow rate = 1mL min, t<sub>R</sub> = 6.58 min (major), t<sub>R</sub> = 7.58 min (minor)].

## References:

1. M. A. Andrews, T. C. T. Chang, C. W. F. Cheng, T. J. Emge, K. P. Kelly, T. F. Koetzle, *J. Am. Chem. Soc.*, 1984, **106**, 5913-5920.
2. F. Ozawa, A. Kubo, Y. Matsumoto, T. Hayashi, *Organometallics*, 1993, **12**, 4188-4196.
3. L. Rubio-Pérez, F. J. Pérez-Flores, P. Sharma, A. Cabrera, *Org. Lett.*, 2009, **11**, 265-268.
4. A. J. Blacker, M. L. Clarke, M. S. Loft, M. F. Mahon, M. E. Humphries, J. M. J. Williams, *Chem. A. Eur. J.*, 2000, **6**, 353-360.
5. T. Suwa, E. Sugiyama, I. Shibata, A. Baba, *Synthesis*, 2000, 789-800.
6. J. Zhou, B. List, *J. Am. Chem. Soc.*, 2007, **129**, 7498-7499.





RoxaPdBr2-3IP-23.jdf

1.8

1.7

1.6

1.5

1.4

1.3

1.2

1.1

1.0

0.9

0.8

0.7

0.6

0.5

0.4

0.3

0.2

0.1

0

-0.1

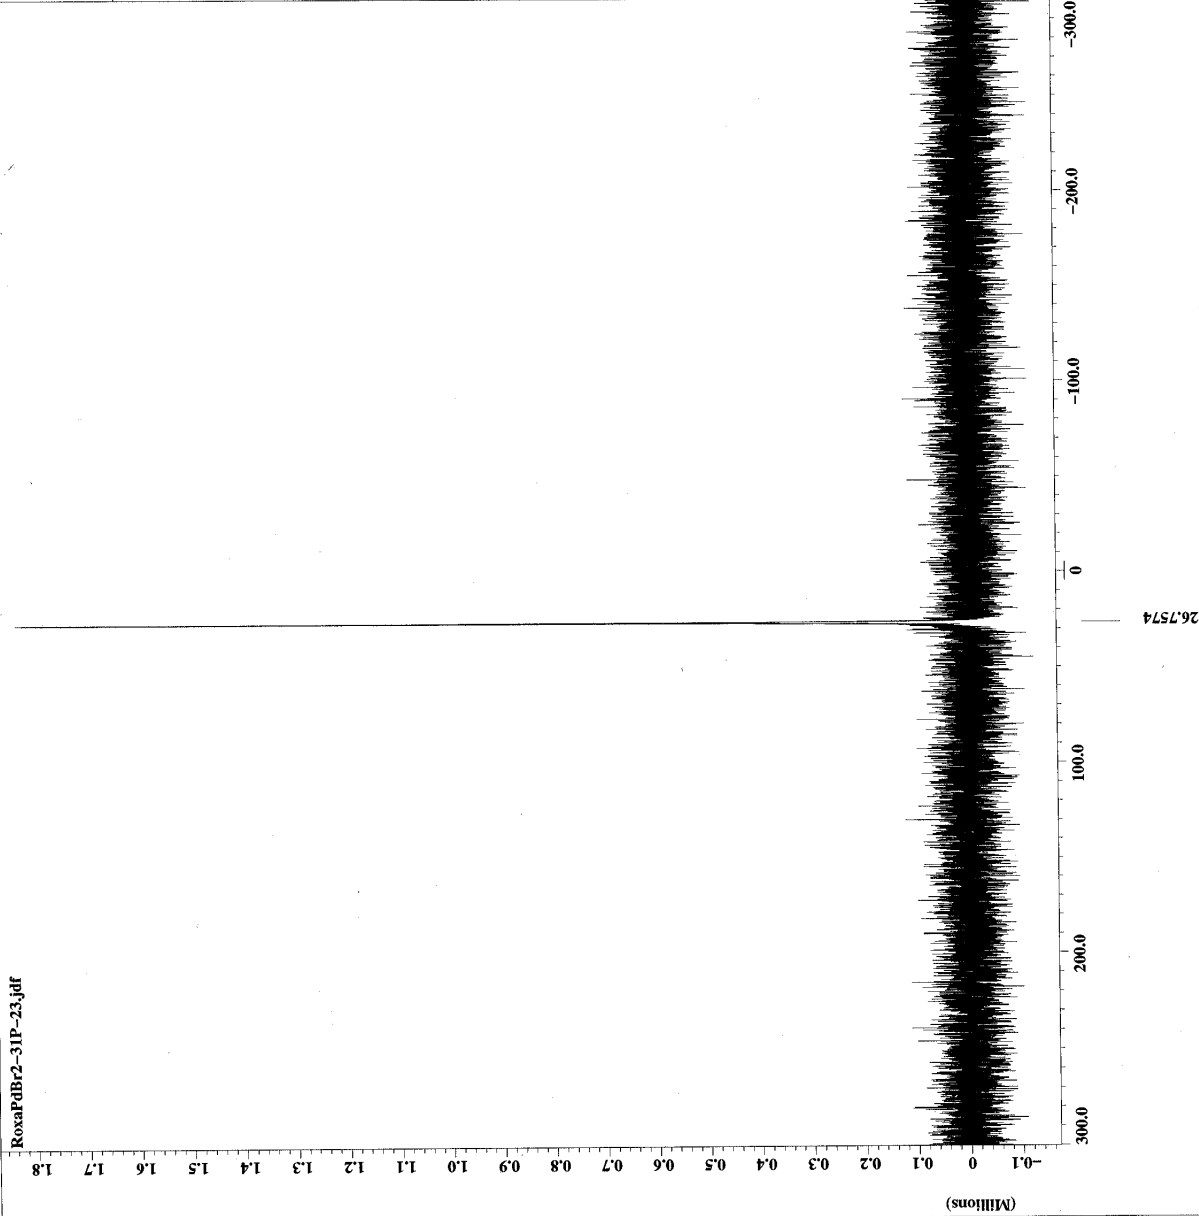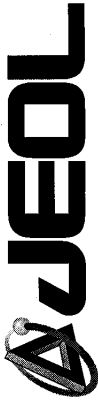

Filename = RoxaPdBr2-3IP-23.jdf  
Author = Cabrera  
Experiment = single\_pulse\_dec  
Sample\_id = Laura  
SOLVENT = CHLOROFORM-D  
Creation\_time = 27-JUN-2008 05:33:45  
Revision\_time = 8-SEP-2008 13:43:45  
Current\_time = 8-SEP-2008 13:43:53  
Comment = Single Pulse with Bro  
Data\_format = 1D COMPLEX  
Dim\_size = 32768  
Dim\_title = 31P  
Dim\_units = [ppm]  
Dimensions = X  
Site = Eclipse+ 300  
Spectrometer = DELTA\_NMR  
Field\_strength = 7.0586013 [T] (300 [MHz]  
X\_acq\_duration = 0.3833856 [s]  
X\_domain = 31P  
X\_freq = 121.65655406 [MHz]  
X\_offset = 0 [ppm]  
X\_points = 32768  
X\_prescans = 4  
X\_resolution = 60834001 [Hz]  
X\_sweep = 65.47008547 [MHz]  
Irr\_domain = 1H  
Irr\_freq = 300.52965592 [MHz]  
Irr\_offset = 5 [ppm]  
Clipped = TRUE  
Mod\_return = 1  
Scans = 139  
Total\_scans = 139  
X\_90\_width = 11.5 [us]  
X\_acq\_time = 0.3833856 [s]  
X\_angle = 30 [deg]  
X\_pulse = 3.83333333 [us]  
Initial\_wait = 1 [s]  
Phase\_preset = 3 [us]  
Recvr\_gain = 26  
Relaxation\_delay = 1 [s]  
Temp\_get = 19.5 [C]  
Unblank\_time = 2 [us]

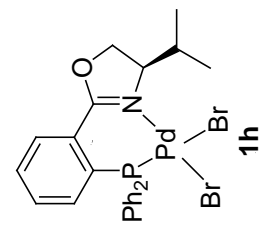

X : parts per Million : 31P

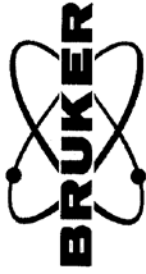

Current Data Parameters  
NAME Cat-4  
EXPNO 1  
PROCNO 1

F2 - Acquisition Parameters  
Date\_ 20120619  
Time 11.24  
INSTRUM spect  
PROBHD 5 mm PABBO BB-  
PULPROG zg30  
TD 65536  
SOLVENT CDC13  
NS 64  
DS 2  
SWH 6203.474 Hz  
FIDRES 0.094658 Hz  
AQ 5.2822518 sec  
RG 161  
DW 80.600 usec  
DE 6.50 usec  
TE 297.2 K  
D1 1.00000000 sec  
TD0 1

===== CHANNEL f1 =====  
NUC1 1H  
P1 13.50 usec  
PLW1 9.24709988 W  
SF01 300.5218558 MHz

F2 - Processing parameters  
SI 65536  
SF 300.5200324 MHz  
WDW EM  
SSB 0  
LB 0  
GB 0  
PC 1.00

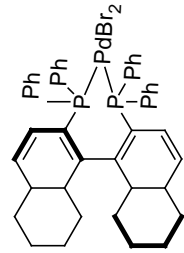

1i

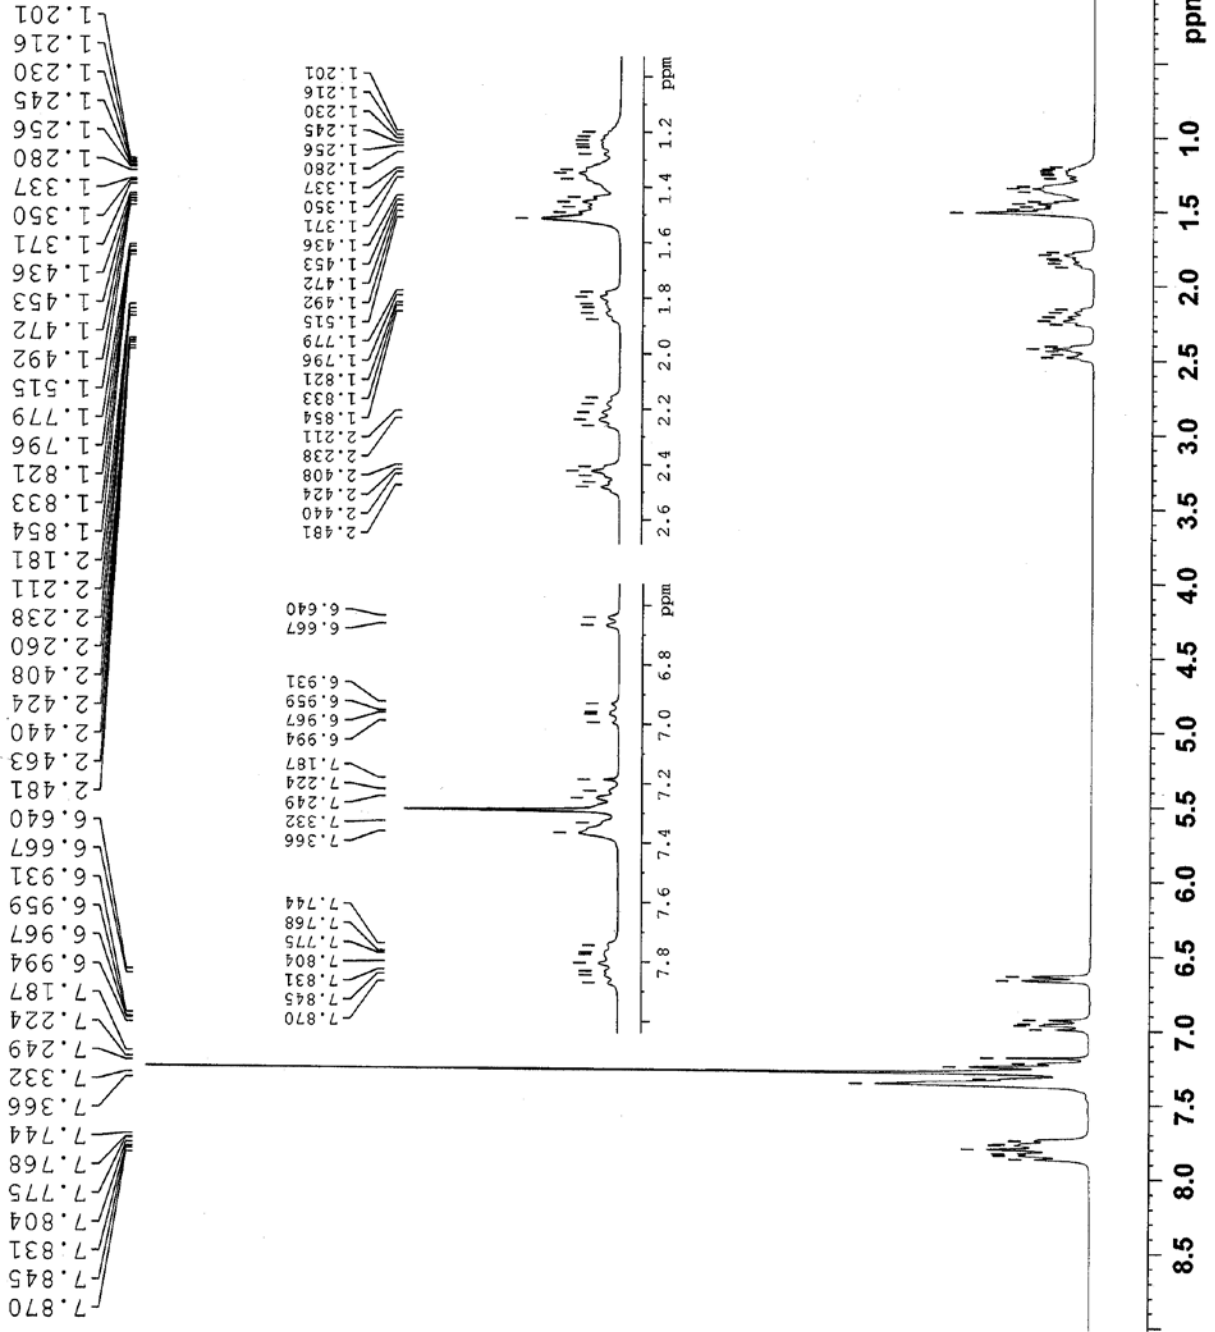

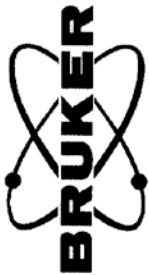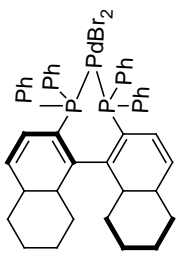

Current Data Parameters  
NAME --- 4  
EXPNO 2  
PROCNO 1

F2 - Acquisition Parameters  
Date\_ 20120619  
Time 11.30  
INSTRUM spect  
PROBHD 5 mm PABBO BB-  
PULPROG zgpg30  
TD 65536  
SOLVENT CDCl3  
NS 100  
DS 4  
SWH 49019.609 Hz  
FIDRES 0.747980 Hz  
AQ 0.6685172 sec  
RG 203  
DW 10.200 usec  
DE 6.50 usec  
TE 297.9 K  
D1 2.00000000 sec  
D11 0.03000000 sec  
TDO 1

==== CHANNEL f1 =====  
NUC1 31P  
PI 9.30 usec  
PLW1 17.10499954 W  
SFO1 121.6405607 MHz

==== CHANNEL f2 =====  
CPDPRG2 waltz16  
NUC2 1H  
PCPD2 90.00 usec  
PLW2 9.24709988 W  
PLW12 0.21741000 W  
PLW13 0.17610000 W  
SFO2 300.5212021 MHz

F2 - Processing parameters  
SI 32768  
SF 121.6527260 MHz  
WDW EM  
SSB 0  
LB 1.00 Hz  
GB 0  
PC 1.40

24.40

80 60 40 20 0 -20 -40 -60 -80 ppm

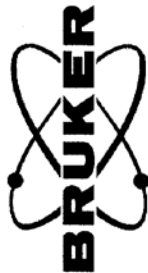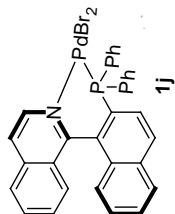

Current Data Parameters  
NAME Cat-5  
EXPNO 11  
PROCNO 1

F2 - Acquisition Parameters  
Date\_ 20120814  
Time\_ 8.32  
INSTRUM spect  
PROBHD 5 mm PABBO BB-  
PULPROG zg30  
TD 65536  
SOLVENT CDCl3  
NS 100  
DS 2  
SWH 59523.809 Hz  
FIDRES 0.908261 Hz  
AQ 0.5505524 sec  
RG 203  
DW 8.400 usec  
DE 6.50 usec  
TE 296.9 K  
DI 2.00000000 sec  
TDO 1

==== CHANNEL f1 =====  
NUC1 31P  
PI 9.30 usec  
PLW1 17.10499954 W  
SFO1 121.6466432 MHz

F2 - Processing parameters  
SI 32768  
SF 121.6527260 MHz  
WDW EM  
SSB 0  
LB 1.00 Hz  
GB 0  
PC 1.40

35.43

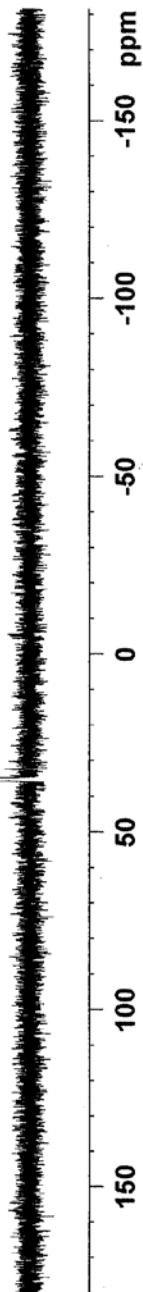

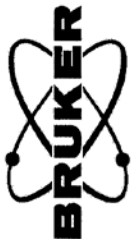

Current Data Parameters  
NAME Reacc707F19  
EXPNO 20  
PROCNO 1

F2 - Acquisition Parameters  
Date\_ 20120222  
Time 12.52  
INSTRUM spect  
PROBHD 5 mm PABBO BB-  
PULPROG zg30  
TD 65536  
SOLVENT CDC13  
NS 32  
DS 1  
SWH 6203.474 Hz  
FIDRES 0.094658 Hz  
AQ 5.2822518 sec  
RG 71.8  
LW 80.600 usec  
DE 6.50 usec  
TE 300.0 K  
D1 1.00000000 sec

==== CHANNEL f1 =====  
NUC1 1H  
P1 13.50 usec  
PLW1 9.24709988 W  
SF01 300.5218558 MHz

F2 - Processing parameters  
SI 65536  
SF 300.5200414 MHz  
WDW EM  
SSB 0 0.30 Hz  
LB 0  
GB 0  
PC 1.00

7.167  
7.157  
7.141  
7.119  
6.838  
6.813  
6.640  
6.592  
6.565  
3.897  
3.880  
3.872  
3.855  
3.846  
3.837  
3.832  
3.815  
3.806  
3.800  
3.784  
2.395  
2.380  
2.361  
2.346  
2.339  
2.330  
2.326  
2.313  
2.308  
1.808  
1.804  
1.797  
1.784  
1.779  
1.772  
1.761  
1.756  
1.745  
1.725  
1.723  
1.714  
1.696

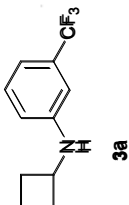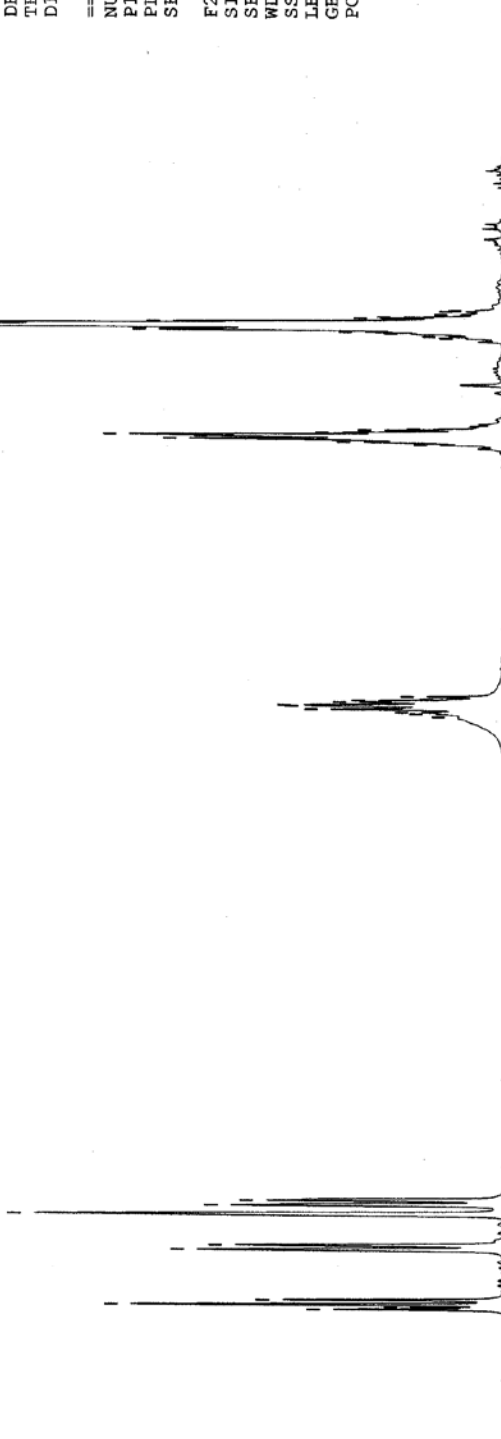

7.5 7.0 6.5 6.0 5.5 5.0 4.5 4.0 3.5 3.0 2.5 2.0 1.5 1.0 0.5 ppm

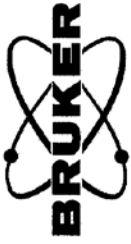

Current Data Parameters  
 NAME Reacc707F19  
 EXPNO 21  
 PROCNO 1

F2 - Acquisition Parameters  
 Date\_ 20120222  
 Time 13.45  
 INSTRUM spect  
 PROBHD 5 mm PABBO BB-  
 PULPROG zgpg30  
 TD 65536  
 SOLVENT CDCl3  
 NS 800  
 DS 1  
 SWH 18028.846 Hz  
 FIDRES 0.275098 Hz  
 AQ 1.8175818 sec  
 RG 203  
 DW 27.733 usec  
 DE 6.50 usec  
 TE 300.0 K  
 D1 2.0000000 sec  
 D11 0.0300000 sec

==== CHANNEL f1 =====  
 NUC1 13C  
 P1 7.90 usec  
 PLW1 48.9669905 W  
 SFO1 75.5733703 MHz

==== CHANNEL f2 =====  
 CPDPRG2 waltz16  
 NUC2 1H  
 PCPD2 90.00 usec  
 PLW2 9.24709988 W  
 PLWI2 0.21741000 W  
 PLWI3 0.17610000 W  
 SFO2 300.5212021 MHz

F2 - Processing parameters  
 SI 32768  
 SF 75.5658140 MHz  
 WDW EM  
 SSB 0  
 LB 1.00 Hz  
 GB 0  
 FC 1.40

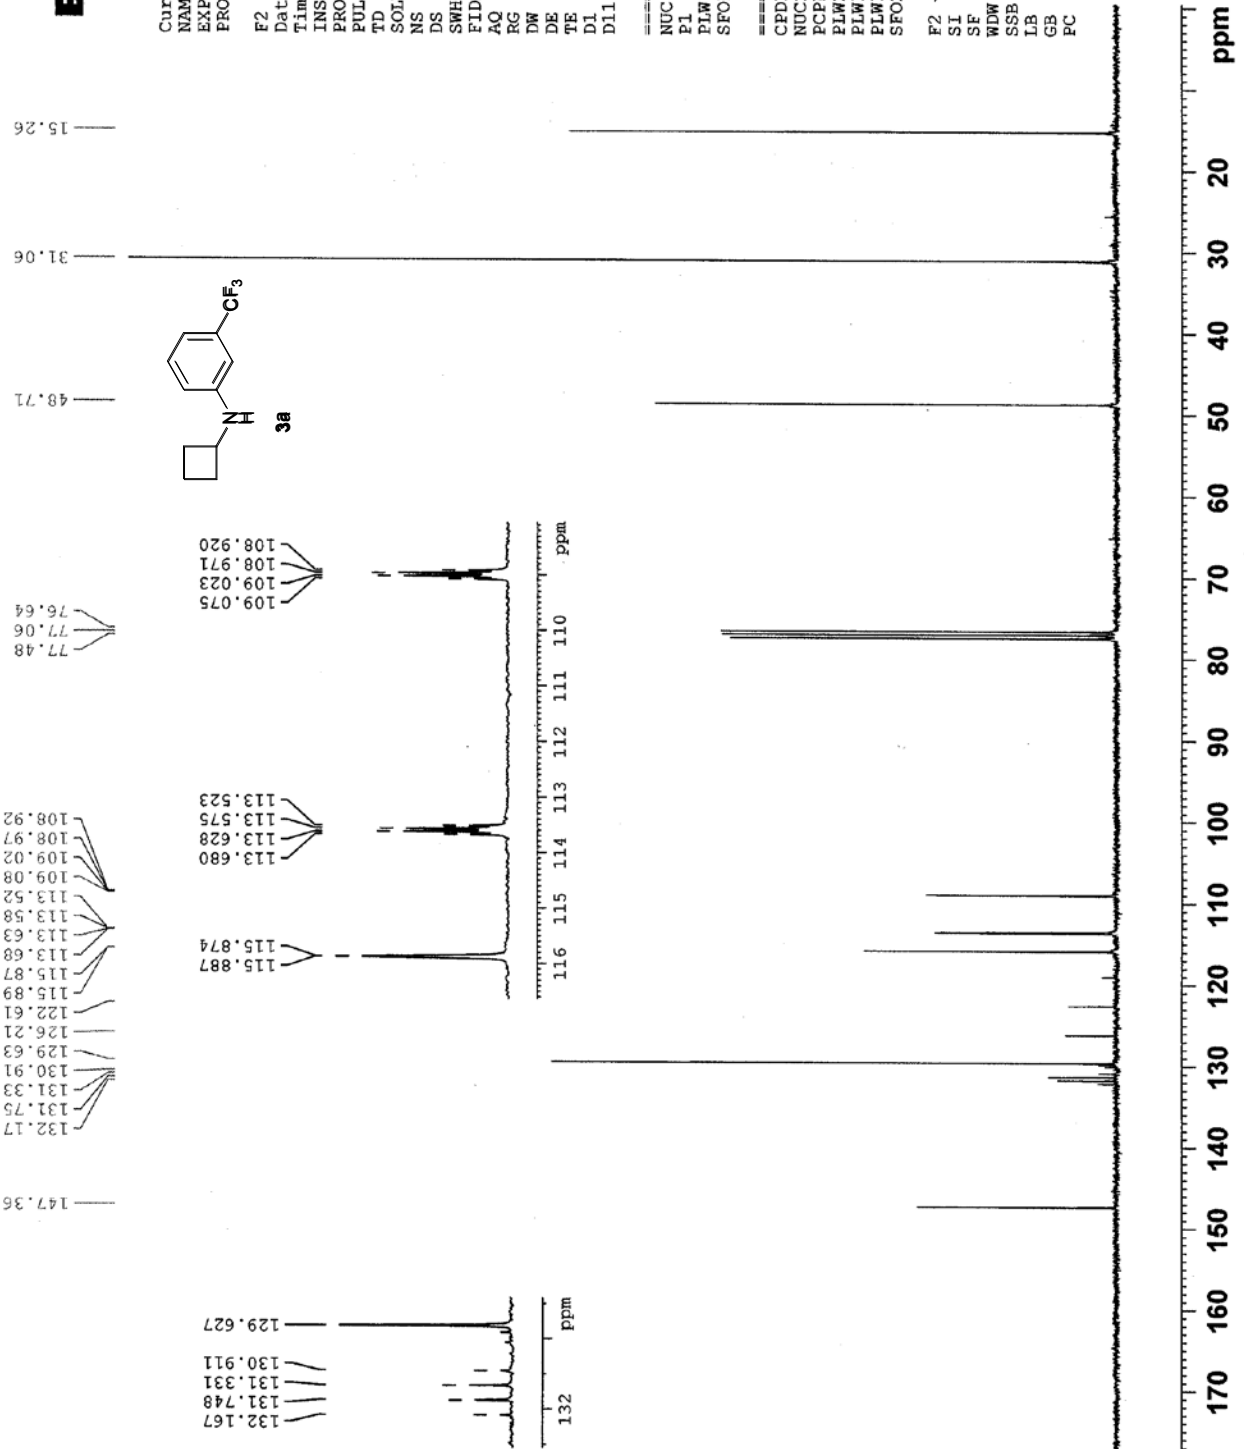

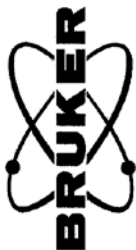

1.481  
1.488  
1.492  
1.496  
1.512  
1.520  
1.530  
1.535  
1.551  
1.553  
1.568  
1.572  
1.670  
1.680  
1.686  
1.706  
1.713  
1.719  
1.724  
1.731  
1.734  
1.740  
1.749  
1.757  
1.764  
1.782  
1.791  
1.801  
1.817  
1.826  
2.048  
2.052  
2.058  
2.071  
2.083  
2.091  
2.106  
2.111  
2.114  
2.123  
2.132  
2.145  
3.836  
3.855  
3.874  
4.143  
6.952  
7.149  
7.295

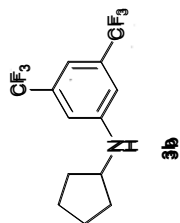

Current Data Parameters  
NAME Reacc711f1314  
EXPNO 10  
PROCNO 1

F2 - Acquisition Parameters  
Date\_ 20120227  
Time\_ 9.48  
INSTRUM spect  
PROBHD 5 mm PABBO BB-  
PULPROG zg30  
TD 65536  
SOLVENT CDCl3  
NS 64  
DS 2  
SWH 6203.474 Hz  
FIDRES 0.094658 Hz  
AQ 5.2822518 sec  
RG 90.5  
DW 80.600 usec  
DE 6.50 usec  
TE 295.3 K  
D1 1.00000000 sec

==== CHANNEL f1 =====  
NUC1 1H  
P1 13.50 usec  
PLW1 9.24709988 W  
SF01 300.5218558 MHz

F2 - Processing parameters  
SI 65536  
SF 300.5200000 MHz  
WDW EM  
SSB 0  
LB 0.30 Hz  
GB 0  
PC 1.00

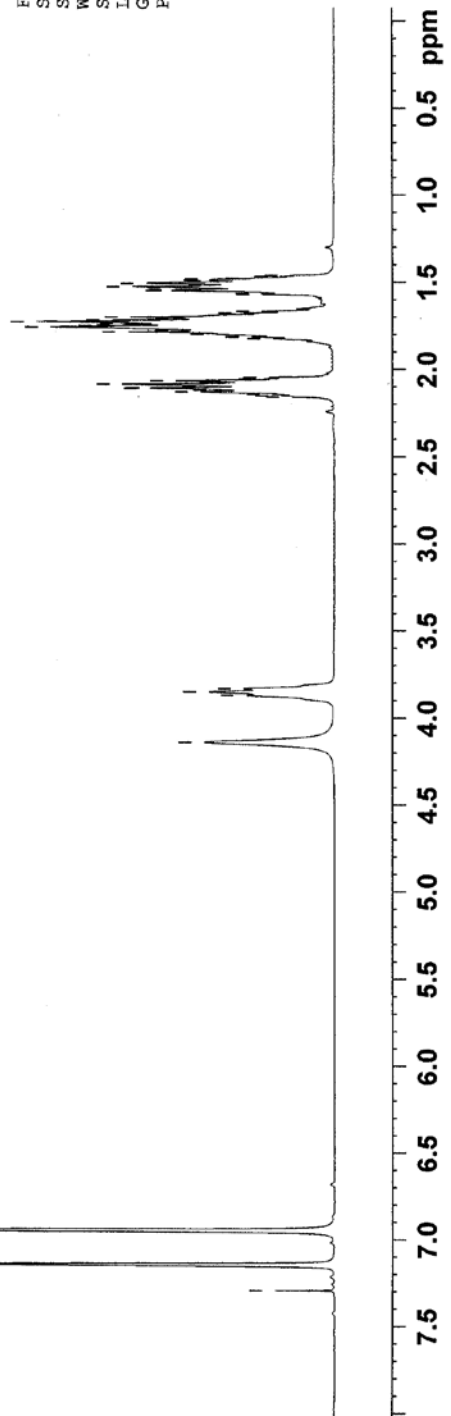

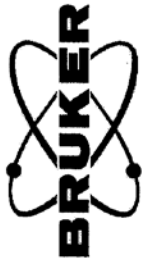

Current Data Parameters  
NAME Reacc711F1314  
EXPNO 11  
PROCNO 1

F2 - Acquisition Parameters  
Date\_ 20120227  
Time 10.35  
INSTRUM spect  
PROBHD 5 mm PABBO BB-  
PULPROG zgpg30  
TD 65536  
SOLVENT CDC13  
NS 700  
DS 2  
SWH 18028.846 Hz  
FIDRES 0.275098 Hz  
AQ 1.8175818 sec  
RG 203  
DW 27.733 usec  
DE 6.50 usec  
TE 295.9 K  
D1 2.0000000 sec  
D11 0.0300000 sec

==== CHANNEL f1 =====  
NUC1 13C  
P1 7.90 usec  
PLW1 48.9669905 W  
SF01 75.5733703 MHz

==== CHANNEL f2 =====  
CPDPRG2 waltz16  
NUC2 1H  
PCPD2 90.00 usec  
PLW2 9.24709988 W  
PLW12 0.21741000 W  
PLW13 0.17610000 W  
SFO2 300.5212021 MHz

F2 - Processing parameters  
SI 32768  
SF 75.5658140 MHz  
WDW EM  
SSB 0  
LB 1.00 Hz  
GB 0  
PC 1.40

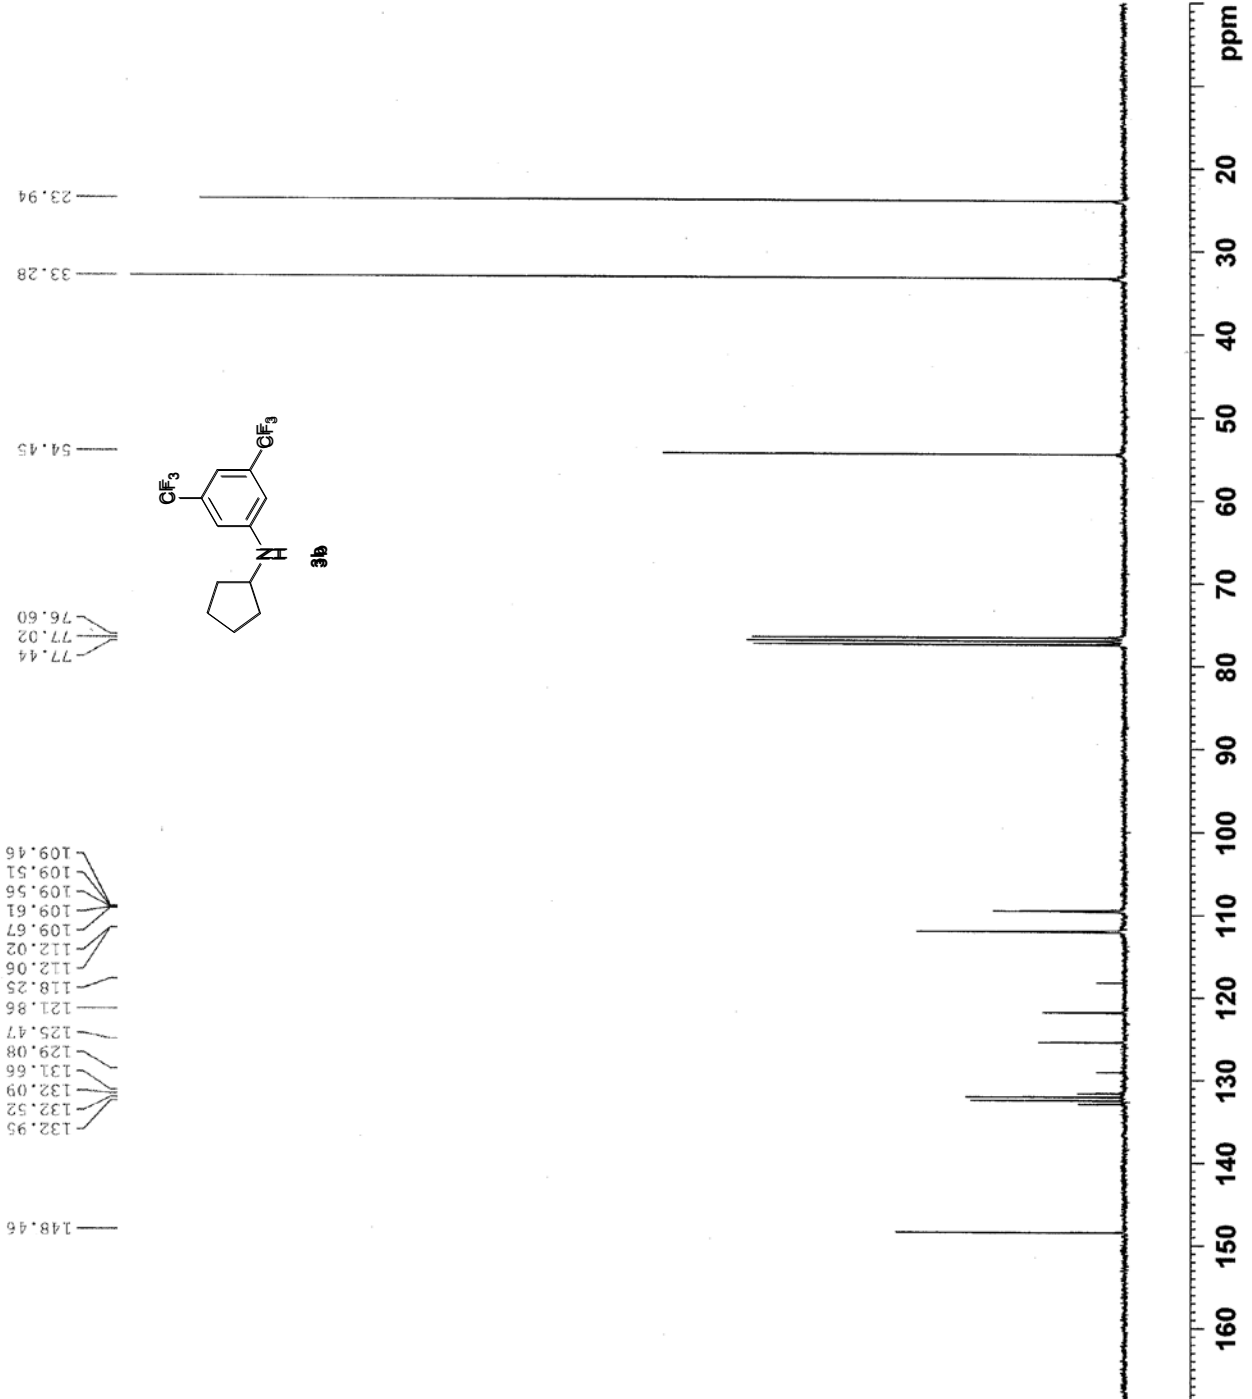



Instituto de Química UNAM NZ  
 Dr. A. Cabrera/Laura R.  
 Clave: Reacc 520  
 CDC13  
 Bruker-Avance 300MHz-F  
 1H  
 No. Registro: 442  
 9-02-09

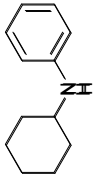

36

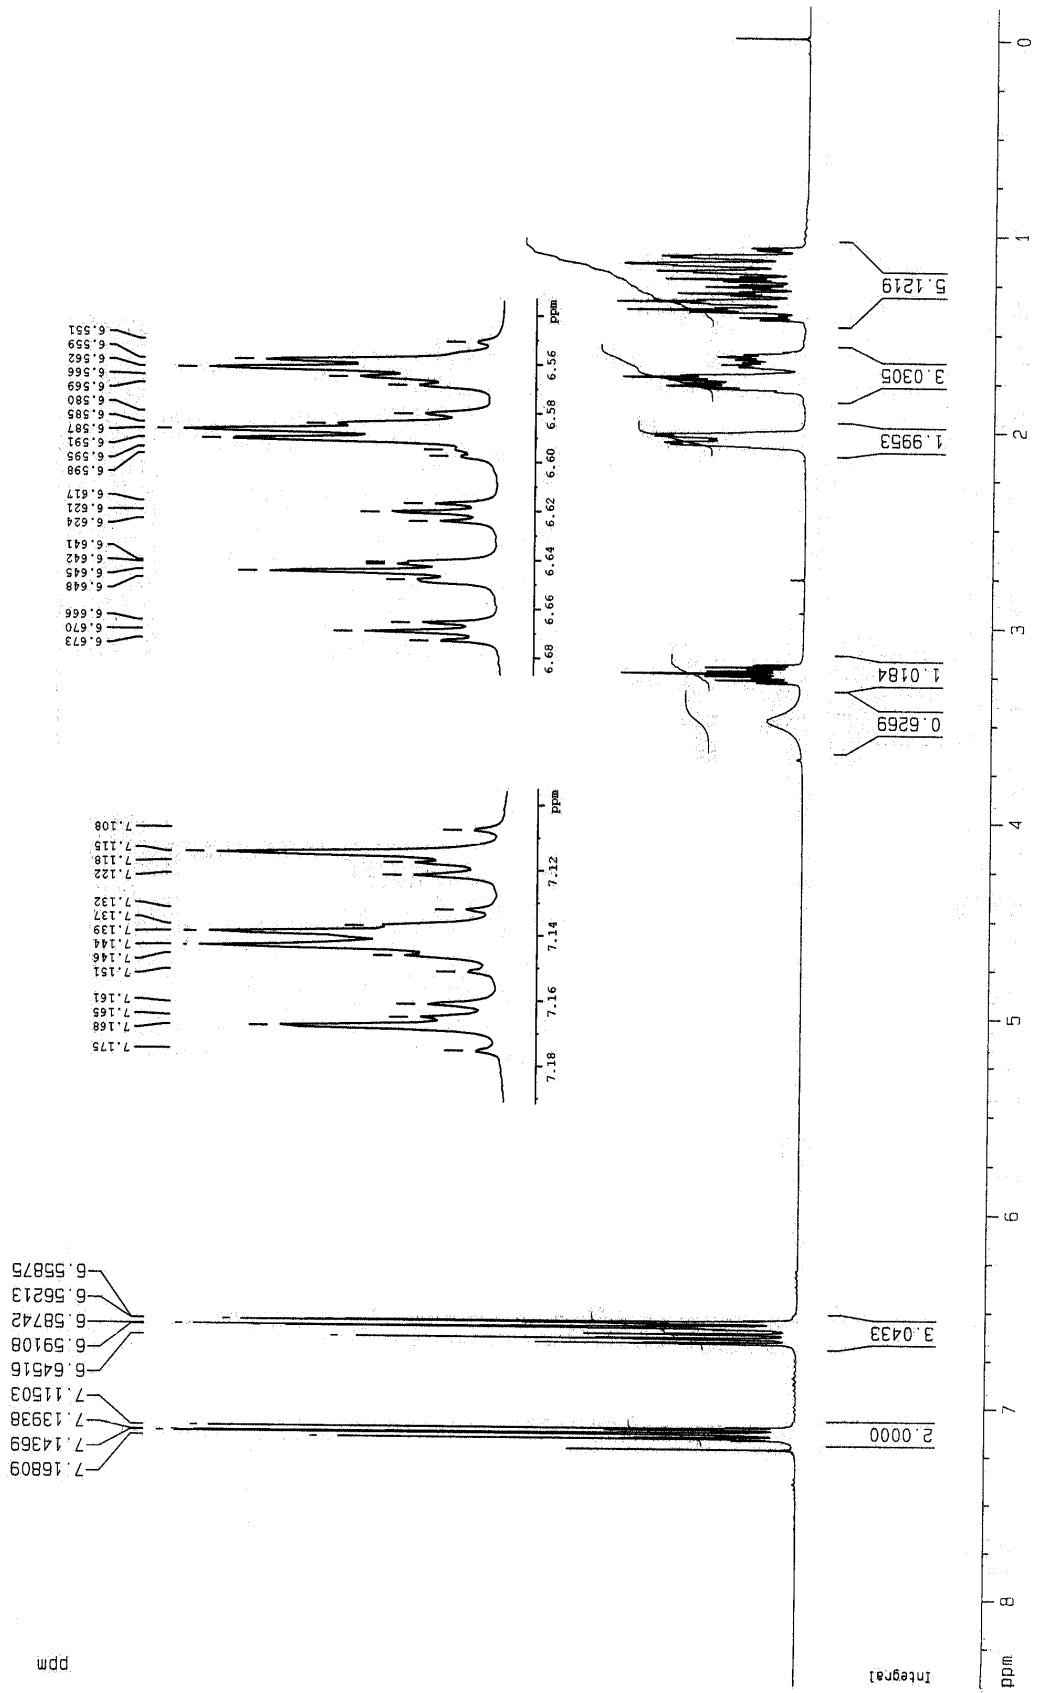

Instituto de Química UNAM NZ

Dr. A. Cabrera/Laura R.

Clave: Reacc 520

CDCl<sub>3</sub>

Bruker-Avance 300MHz-F

<sup>13</sup>C

No. Registro: 442

9-02-09

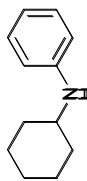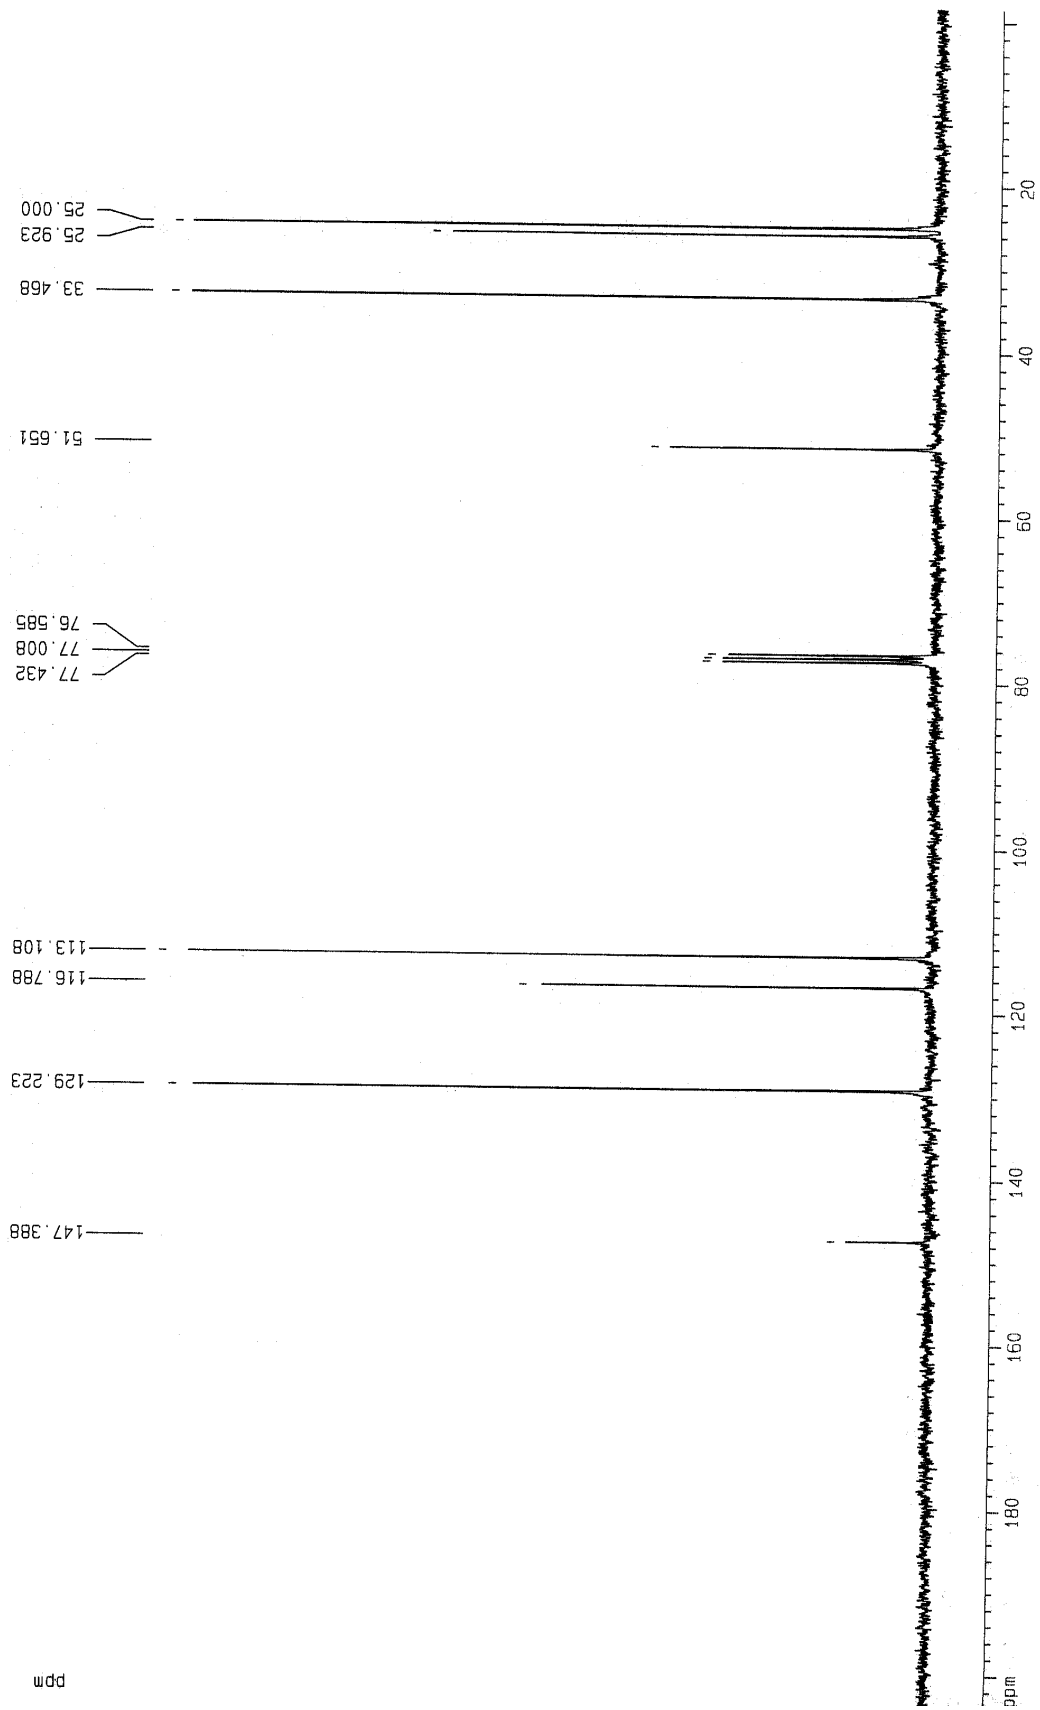

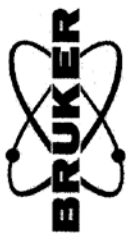

4.250  
4.228  
3.337  
3.304  
3.292  
3.279  
3.246  
2.078  
2.066  
2.061  
2.045  
2.037  
1.841  
1.829  
1.815  
1.798  
1.785  
1.723  
1.714  
1.711  
1.698  
1.685  
1.679  
1.671  
1.659  
1.644  
1.486  
1.476  
1.465  
1.460  
1.448  
1.438

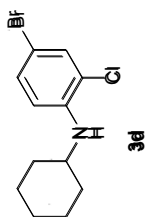

Current Data Parameters  
NAME Reacc710F14  
EXPNO 10  
PROCNO 1

F2 - Acquisition Parameters  
Date\_ 20120223  
Time\_ 9.31  
INSTRUM spect  
PROBHD 5 mm FAPBO BB-  
PULPROG zg30  
TD 65536  
SOLVENT CDC13  
NS 64  
DS 1  
SWH 6203.474 Hz  
FIDRES 0.094658 Hz  
AQ 5.2822518 sec  
RG 114  
DW 80.600 usec  
DE 6.50 usec  
TE 295.4 K  
D1 1.0000000 sec

==== CHANNEL f1 =====  
NUC1 1H  
P1 13.50 usec  
PLW1 9.24709988 W  
SF01 300.5218558 MHz

F2 - Processing parameters  
SI 65536  
SF 300.5200000 MHz  
WDW EM  
SSB 0  
LB 0.30 Hz  
GB 0  
PC 1.00

7.395  
7.387  
7.294  
7.241  
7.233  
7.212  
7.204  
6.578  
6.548

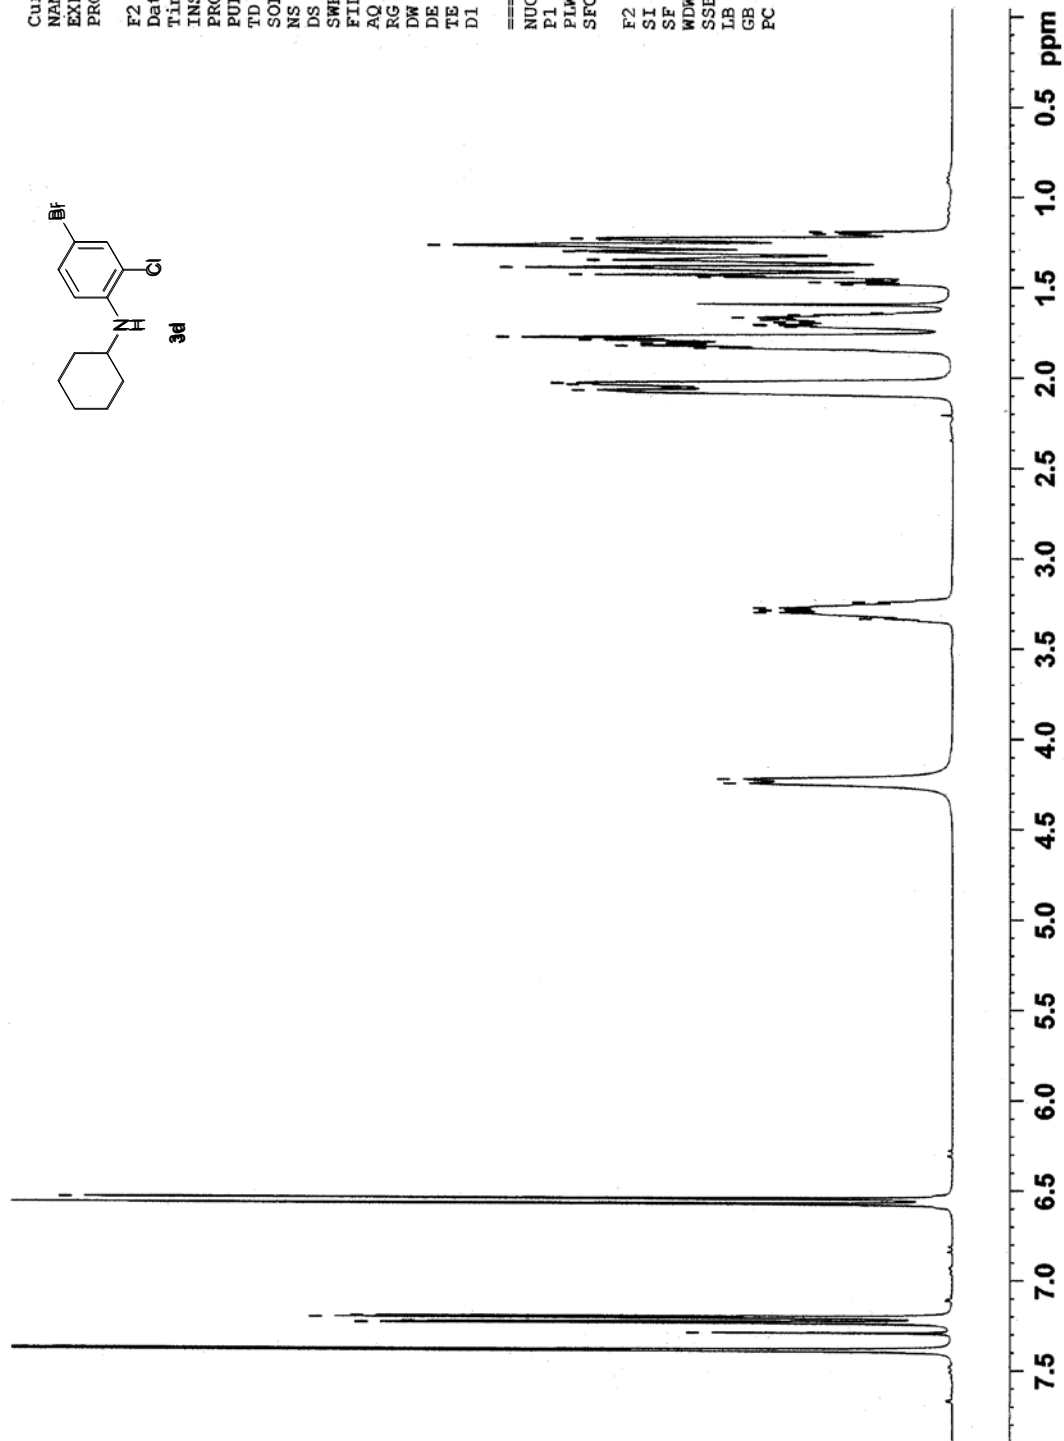

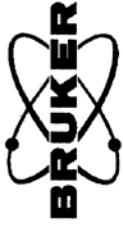

Current Data Parameters  
NAME Reacc710F14  
EXPNO 11  
PROCNO 1

F2 - Acquisition Parameters  
Date\_ 20120223  
Time\_ 10.38  
INSTRUM spect  
PROBHD 5 mm PABBO BB-  
PULPROG zgpg30  
TD 65536  
SOLVENT CDCl3  
NS 1024  
DS 1  
SWH 18028.846 Hz  
FIDRES 0.275098 Hz  
AQ 1.8175818 sec  
RG 203  
DW 27.733 usec  
DE 6.50 usec  
TE 296.0 K  
D1 2.00000000 sec  
D11 0.03000000 sec

==== CHANNEL f1 =====  
NUC1 13C  
P1 7.90 usec  
PLW1 48.96699905 W  
SFO1 75.5733703 MHz

==== CHANNEL f2 =====  
CPDPRG2 waltz16  
NUC2 1H  
PCPD2 90.00 usec  
PLW2 9.24709988 W  
PLW12 0.21741000 W  
PLW13 0.17610000 W  
SFO2 300.5212021 MHz

F2 - Processing parameters  
SI 32768  
SF 75.5658140 MHz  
WDW EM  
SSB 0  
LB 1.00 Hz  
GB 0  
PC 1.40

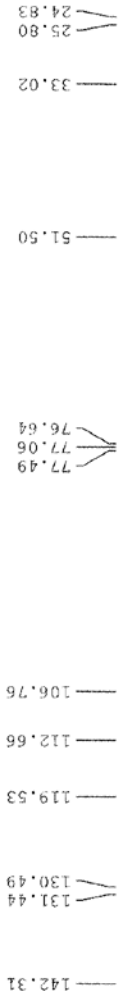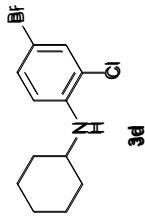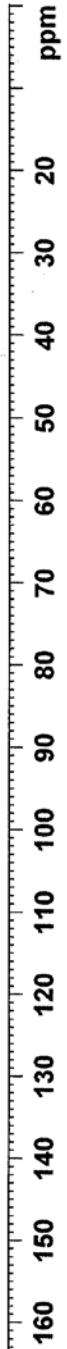

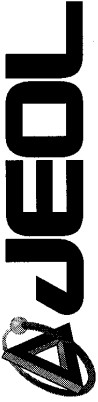

```

Filename = Reacc530F2526-1H-7.jd
Author = Cabrera
Experiment = single_pulse.exp
Sample_id = Laura
Solvent = CHLOROFORM-D
Creation time = 22-DEC-2008 08:03:03
Revision time = 5-MAR-2009 16:16:43
Current_time = 5-MAR-2009 16:16:42

Comment = Single Pulse Experiment
Data_format = 1D COMPLEX
Dim_size = 16384
Dim_title = 1H
Dim_units = [ppm]
Dimensions = X
Site = Eclipse+ 300
Spectrometer = DELTA_RMR

Field_strength = 7.0586013[T] (300[MEZ]
X_acq_duration = 3.6339712[fs]
X_domain = 1H
X_freq = 300.52965592[MEHz]
X_offset = 5[ppm]
X_points = 0
X_prescan = 0
X_resolution = 0.27518105[Hz]
X_sweep = 4.50856628[MEHz]
Clipped = FALSE
Mod_return = 1
Scans = 64
Total_scans = 64

X_90_width = 9.5[us]
X_acq_time = 3.6339712[fs]
X_angle = 45[deg]
X_pulse = 4.75[us]
Initial_wait = 1[fs]
Phase_preset = 3[us]
Recvr_gain = 20
Relaxation_delay = 1[fs]
Temp_get = 19.3[dc]
Unblank_time = 2[us]

```

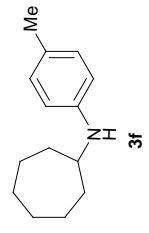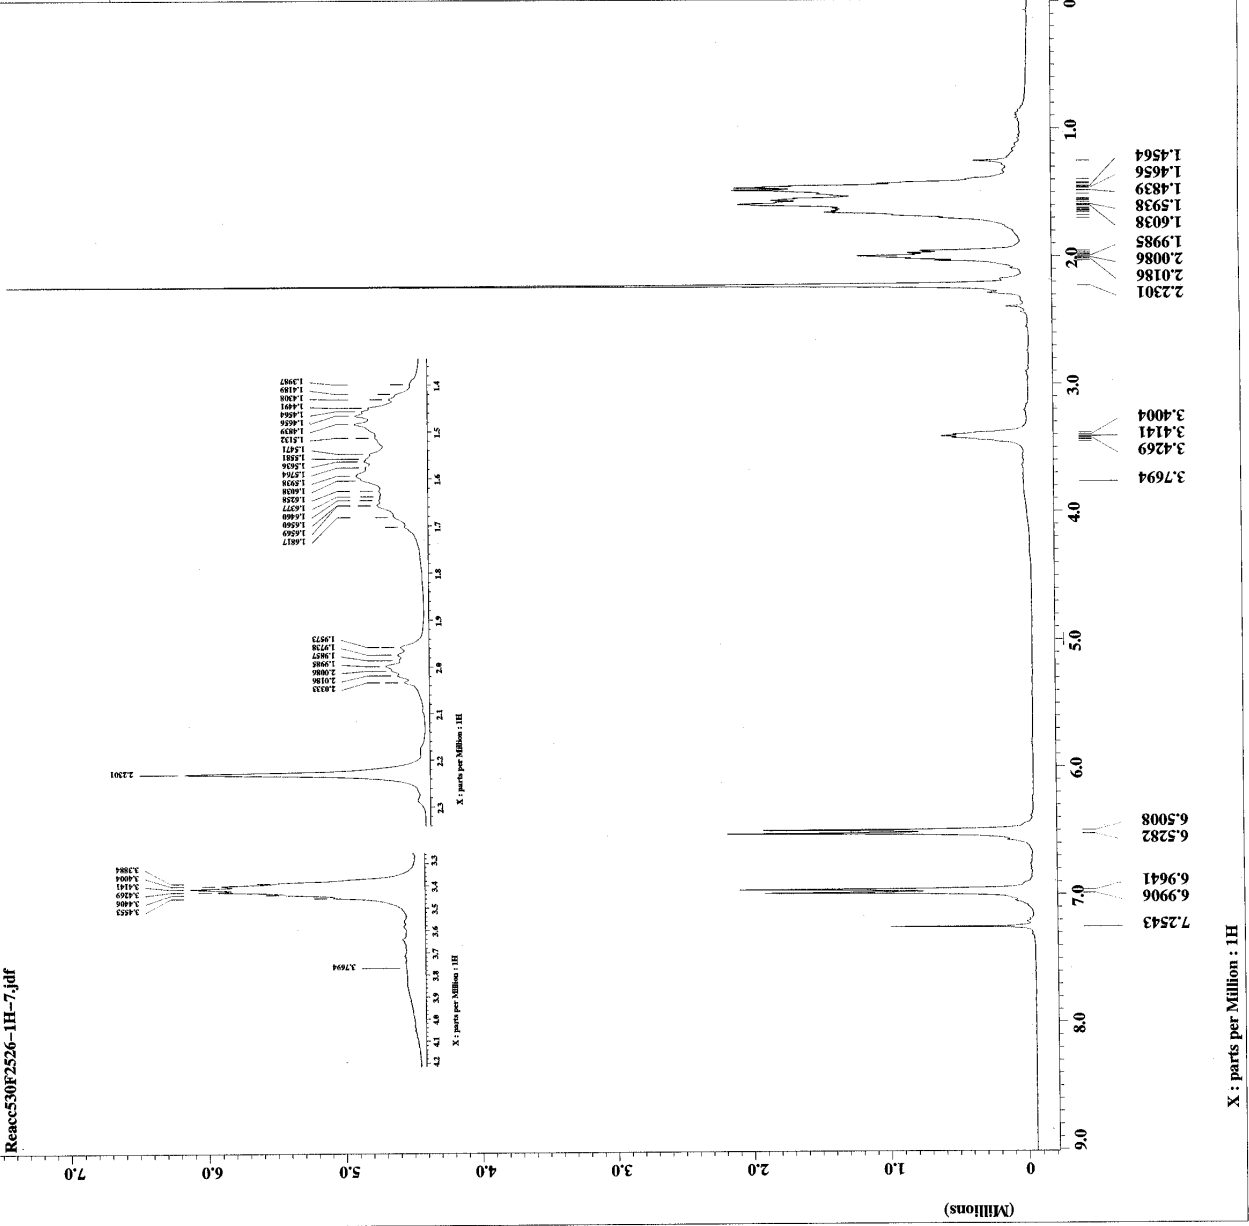

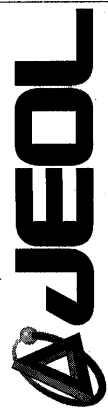

```

Filename = Reacc530F2526-13C-6.j
Author = Cabrera
Experiment = single_pulse_dec
Sample_id = Laura
Solvent = CHLOROFORM-D
Creation_time = 22-DEC-2008 08:50:02
Revision_time = 5-MAR-2009 16:56:22
Current_time = 5-MAR-2009 16:56:48

Comment = Single Pulse with Bro
Data_format = 1D COMPLEX
Dim_size = 32768
Dim_title = 13C
Dim_units = [ppm]
Dimensions = 2
Site = Scipase+ 300
Spectrometer = DELTA_NMR

Field_strength = 7.0586013[F] (300[MHz]
X_acq_duration = 1.7334272[s]
X_domain = 13C
X_freq = 75.56823426[MHz]
X_offset = 100[ppm]
X_points = 32768
X_prescans = 4
X_resolution = 0.57689184[Hz]
X_sweep = 18.90359168[kHz]
Irr_domain = 1H
Irr_freq = 300.52965592[MHz]
Irr_offset = 5[ppm]
Clipped = FALSE
Mod_return = 1
Scans = 943
Total_scans = 943

X_90_width = 11.3[us]
X_acq_time = 1.7334272[s]
X_angle = 30[deg]
X_pulse = 3.76666667[us]
Initial_wait = 1[s]
Phase_preset = 3[us]
Recvr_gain = 30
Relaxation_delay = 1[s]
Temp_get = 21.1[dc]
Unblank_time = 2[us]
    
```

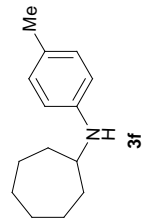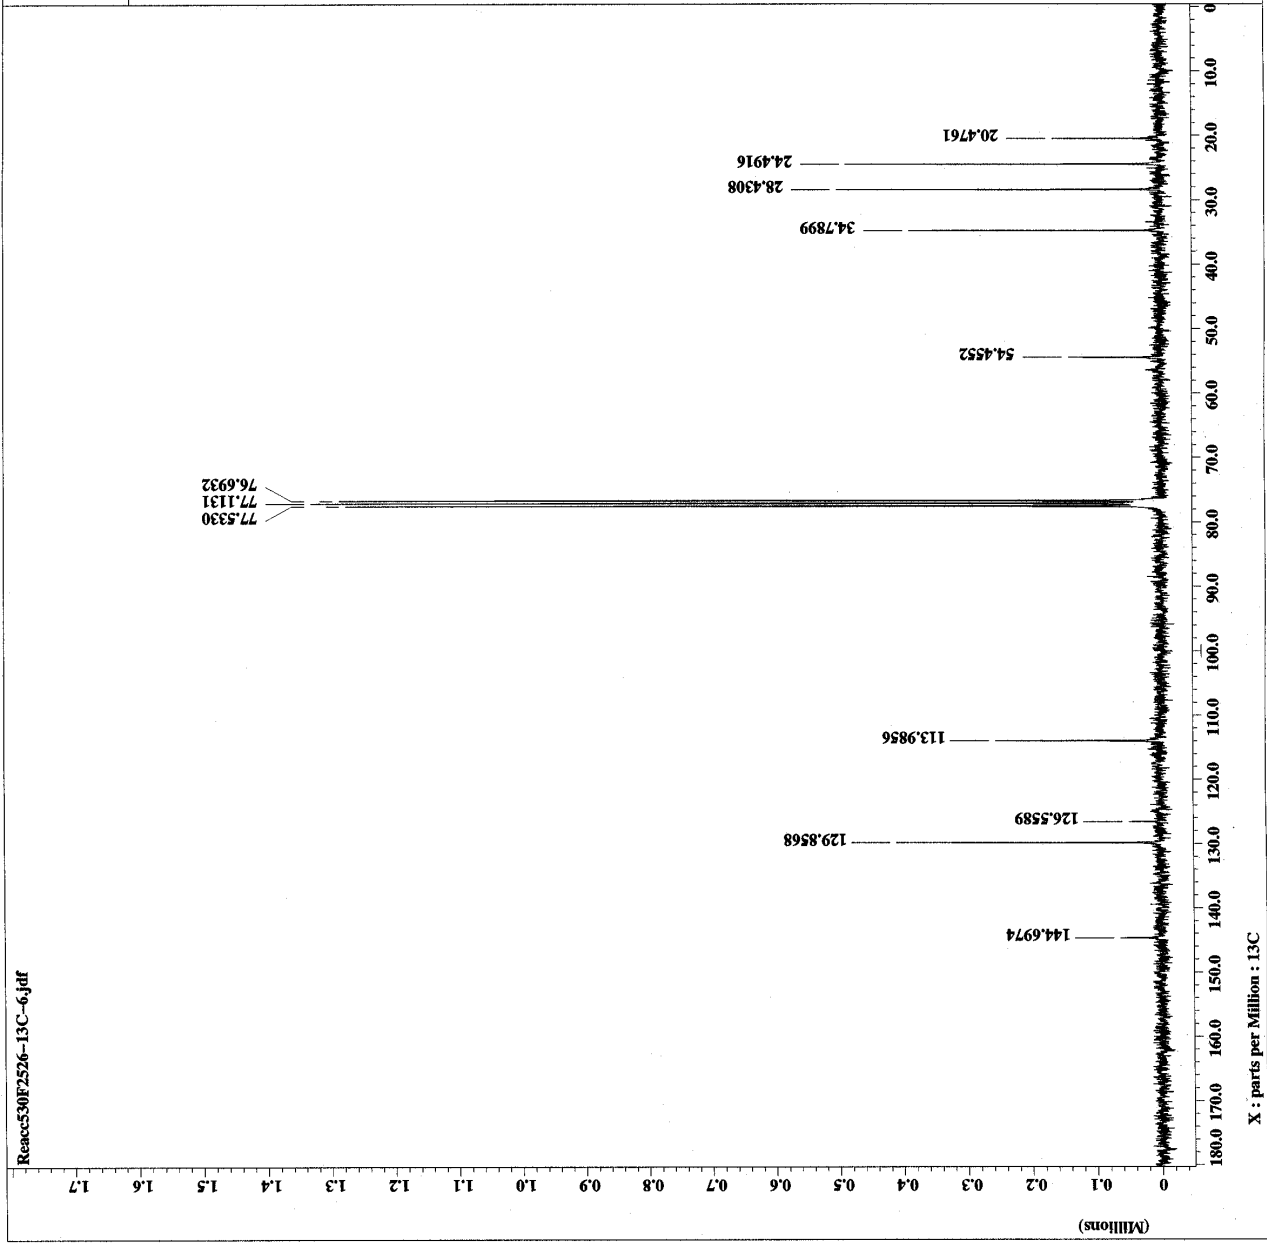

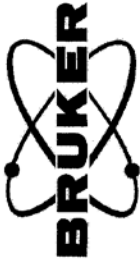

4.329  
3.591  
3.580  
3.569  
2.074  
2.060  
2.049  
2.032  
2.002  
1.767  
1.744  
1.725  
1.686  
1.662  
1.655  
1.637  
1.633  
1.621  
1.608  
1.601  
1.592  
1.579  
1.565  
1.556

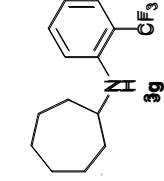

7.467  
7.463  
7.440  
7.437  
7.402  
7.375  
7.350  
7.295  
6.714  
6.692  
6.689  
6.686  
6.671  
6.669

Current Data Parameters  
NAME Reacc546F7-8  
EXPNO 10  
PROCNO 1  
F2 - Acquisition Parameters  
Date\_ 20120302  
Time\_ 7.53  
INSTRUM spect  
PROBHD 5 mm PABBO BB-  
PULPROG zg30  
TD 65536  
SOLVENT CDCl3  
NS 64  
DS 2  
SWH 6203.474 Hz  
FIDRES 0.094658 Hz  
AQ 5.2822518 sec  
RG 128  
DW 80.600 usec  
DE 6.50 usec  
TE 295.4 K  
D1 1.00000000 sec

==== CHANNEL f1 =====  
NUC1 1H  
P1 13.50 usec  
PLW1 9.24709988 W  
SF01 300.5218558 MHz  
F2 - Processing parameters  
SI 65536  
SF 300.5200000 MHz  
WDW EM  
SSB 0  
LB 0.30 Hz  
GB 0  
PC 1.00

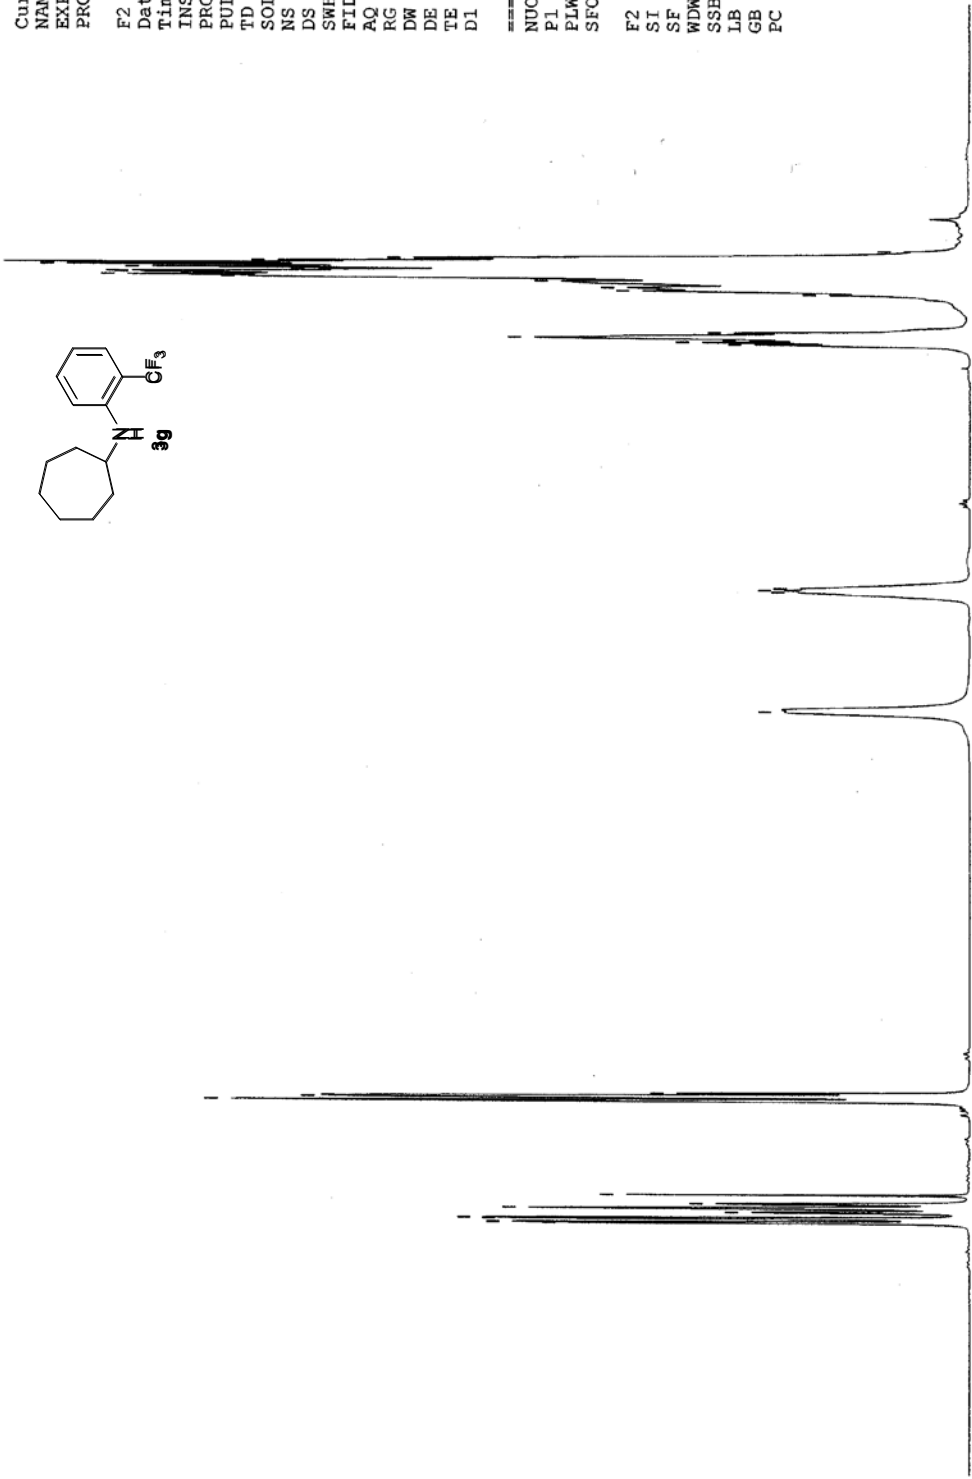

8.5 8.0 7.5 7.0 6.5 6.0 5.5 5.0 4.5 4.0 3.5 3.0 2.5 2.0 1.5 1.0 ppm

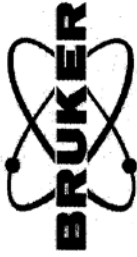

Current Data Parameters  
NAME Reacc546F7-8  
EXPNO 11  
PROCNO 1

F2 - Acquisition Parameters

Date\_ 20120302  
Time\_ 8.47  
INSTRUM spect  
PROBHD 5 mm FAPBO BB-  
PULPROG zgpg30  
TD 65536  
SOLVENT CDCl3  
NS 800  
DS 1  
SWH 18028.846 Hz  
FIDRES 0.275098 Hz  
AQ 1.8175818 sec  
RG 203  
DM 27.733 usec  
DE 6.50 usec  
TE 296.0 K  
D1 2.00000000 sec  
D11 0.03000000 sec

==== CHANNEL f1 =====  
NUC1 13C  
P1 7.90 usec  
PLW1 48.9669905 W  
SFO1 75.5733703 MHz

==== CHANNEL f2 =====  
CPDPRG2 waitz16  
NUC2 1H  
PCPD2 90.00 usec  
PLW2 9.24709988 W  
PLW12 0.21741000 W  
PLW13 0.17610000 W  
SFO2 300.5212021 MHz

F2 - Processing parameters

SI 32768  
SF 75.5658140 MHz  
WDW EM  
SSB 0  
LB 1.00 Hz  
GB 0  
PC 1.40

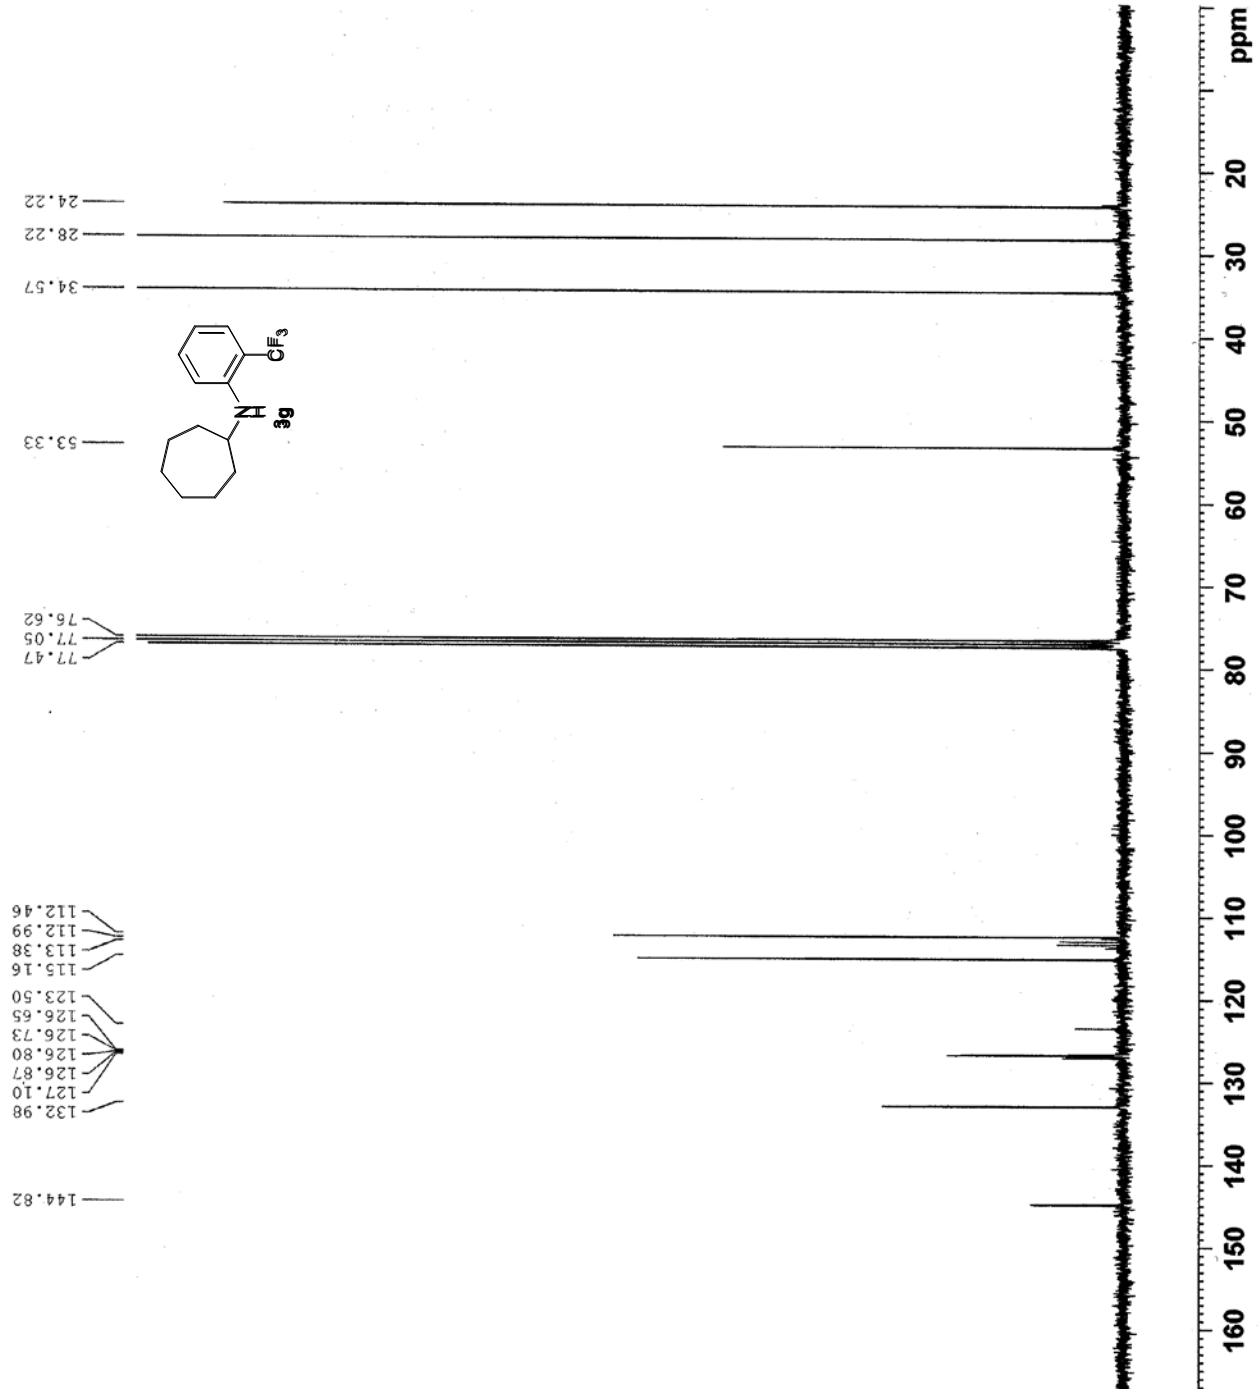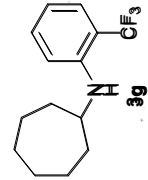



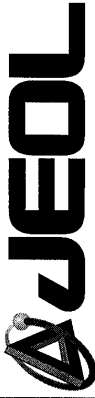

Reacc533F26-1H-7.jdf  
= Cabrera  
= single\_pulse.exp  
= laura.ppmk.D  
= 28-DEC-2008 08:01:30  
= 17-MAR-2009 13:07:04  
= 17-MAR-2009 13:07:53  
= Single Pulse Experiment  
= 1D COMPLEX  
= 16384  
= 1H  
= [ppm]  
= X  
= Eclipse+ 300  
= DELTA\_NMR  
Spectrometer  
Field\_strength = 7.0586013[T] (300[Mhz])  
X\_acq\_duration = 3.6339712[s]  
X\_domain = 1H  
X\_freq = 300.52965592[Mhz]  
X\_offset = 5.199ppm  
X\_points = 65384  
X\_time = 1.000000000  
X\_resolution = 0.27518105[Hz]  
X\_sweep = 4.50856628[Mhz]  
Clipped = FALSE  
Mod\_return = 1  
Scans = 32  
Total\_scans = 32  
X\_90\_width = 9.5[us]  
X\_acq\_time = 3.6339712[s]  
X\_angle = 45[deg]  
X\_pulse = 4.75[us]  
Initial\_wait = 1[s]  
Phase\_preset = 3[us]  
Recvr\_gain = 13  
Relaxation\_delay = 1[s]  
Temp\_get = 30.3[degC]  
Onbftank\_time = 2[us]

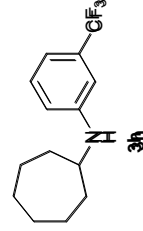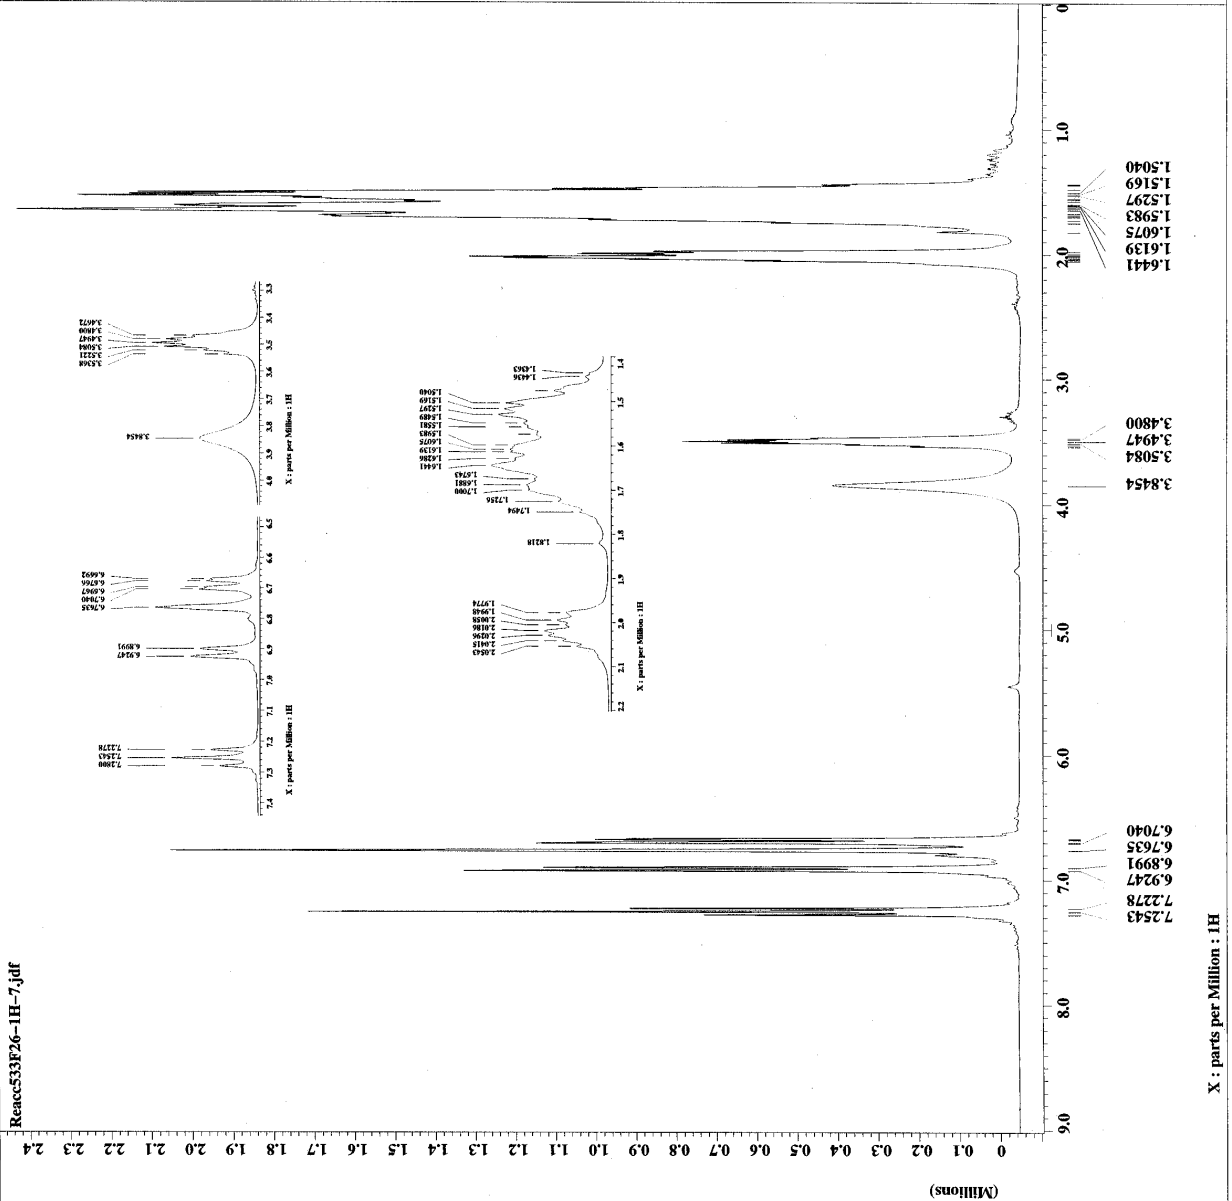



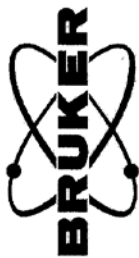

Current Data Parameters  
NAME Reacc545F12  
EXPNO 10  
PROCNO 1

F2 - Acquisition Parameters  
Date\_ 20120228  
Time\_ 8.21  
INSTRUM spect  
PROBHD 5 mm PABBO BB-  
PULPROG zg30  
TD 65536  
SOLVENT CDCl3  
NS 64  
DS 1  
SWH 6203.474 Hz  
FIDRES 0.094658 Hz  
AQ 5.2822518 sec  
RG 57  
DW 80.600 usec  
DE 6.50 usec  
TE 295.2 K  
D1 1.00000000 sec

==== CHANNEL f1 =====  
NUC1 1H  
P1 13.50 usec  
PLW1 9.24709988 W  
SFO1 300.5218558 MHz

F2 - Processing parameters  
SI 65536  
SF 300.5200407 MHz  
WDW EM  
SSB 0  
LB 0.30 Hz  
GB 0  
PC 1.00

7.164  
7.159  
7.138  
7.112  
6.799  
6.773  
6.644  
6.593  
6.586  
6.566  
6.559  
  
3.701  
3.451  
3.438  
3.426  
3.414  
3.400  
3.387  
  
1.839  
1.827  
1.809  
1.796  
1.763  
1.661  
1.638  
1.615  
1.578  
1.547  
1.518  
1.513  
1.478  
1.449

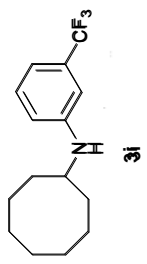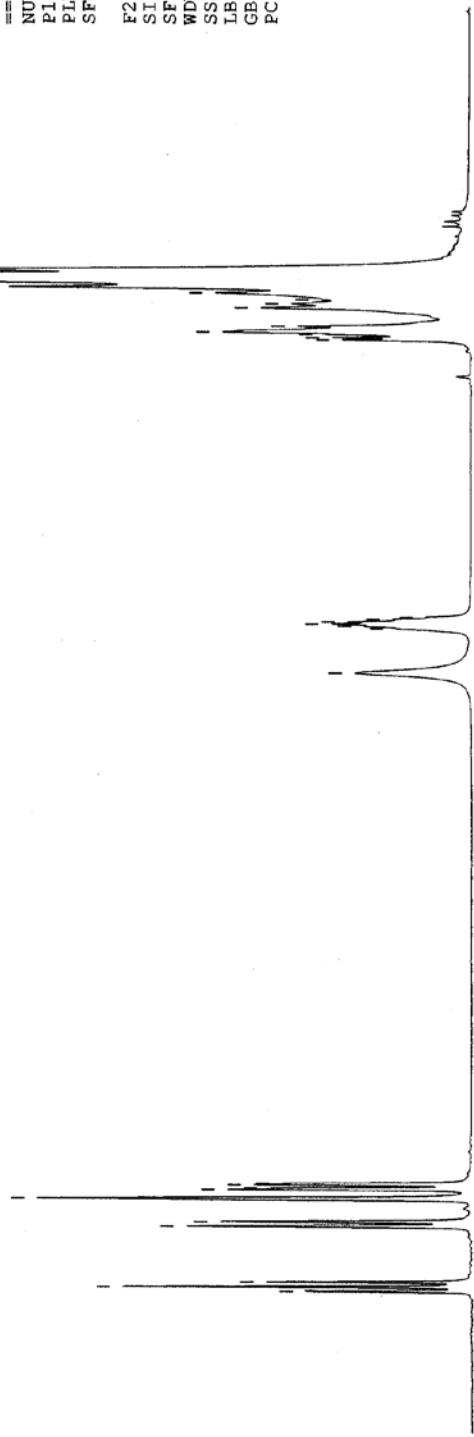

7.5 7.0 6.5 6.0 5.5 5.0 4.5 4.0 3.5 3.0 2.5 2.0 1.5 1.0 0.5 ppm

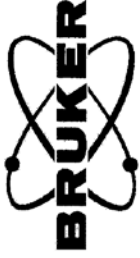

Current Data Parameters  
NAME Reacc545F12  
EXPNO 11  
PROCNO 1

F2 - Acquisition Parameters  
Date\_ 20120228  
Time 9.08  
INSTRUM spect  
PROBHD 5 mm PABDO BB-  
PULPROG zgpg30  
TD 65536  
SOLVENT CDCl3  
NS 700  
DS 1  
SWH 18028.846 Hz  
FIDRES 0.275098 Hz  
AQ 1.8175818 sec  
RG 203  
DW 27.733 usec  
DE 6.50 usec  
TE 295.8 K  
D1 2.0000000 sec  
D11 0.03000000 sec

==== CHANNEL f1 =====  
NUC1 13C  
P1 7.90 usec  
PLW1 48.9669905 W  
SFO1 75.5733703 MHz

==== CHANNEL f2 =====  
CFPRG2 waltz16  
NUC2 1H  
ECPD2 90.00 usec  
PLW2 9.24709988 W  
PLW12 0.21741000 W  
PLW13 0.17610000 W  
SFO2 300.5212021 MHz

F2 - Processing parameters  
SI 32768  
SF 75.5658140 MHz  
WDW EM  
SSB 0  
LB 1.00 Hz  
GB 0  
PC 1.40

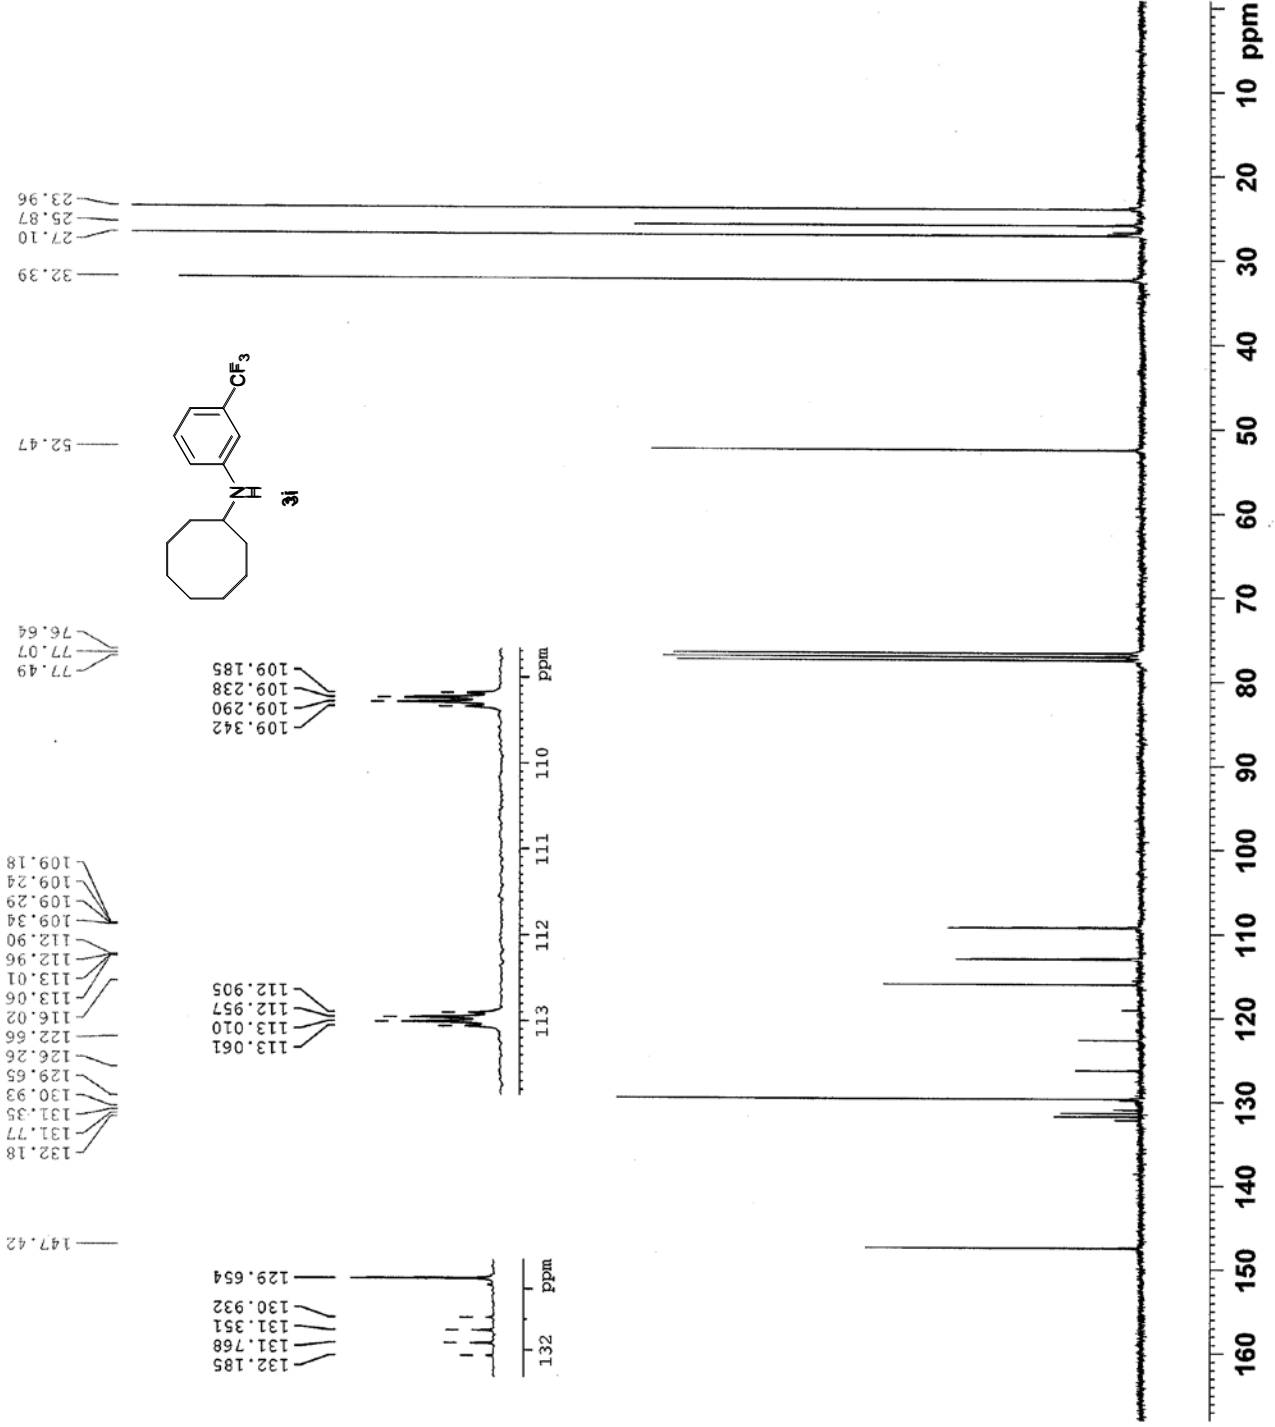



UNAM - Instituto de Química (H. Ríos)  
Dr.-Acabrera  
Clave: Reacc724F30  
No. registro: 1114  
Experimento: RMN-C13  
Disolvente: CDCl3  
Unity/Inova-125.71MHz (G)  
18-Mayo-2012

File: Carbon

Pulse Sequence: s2pul

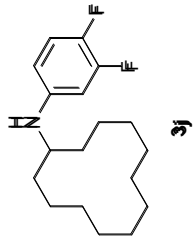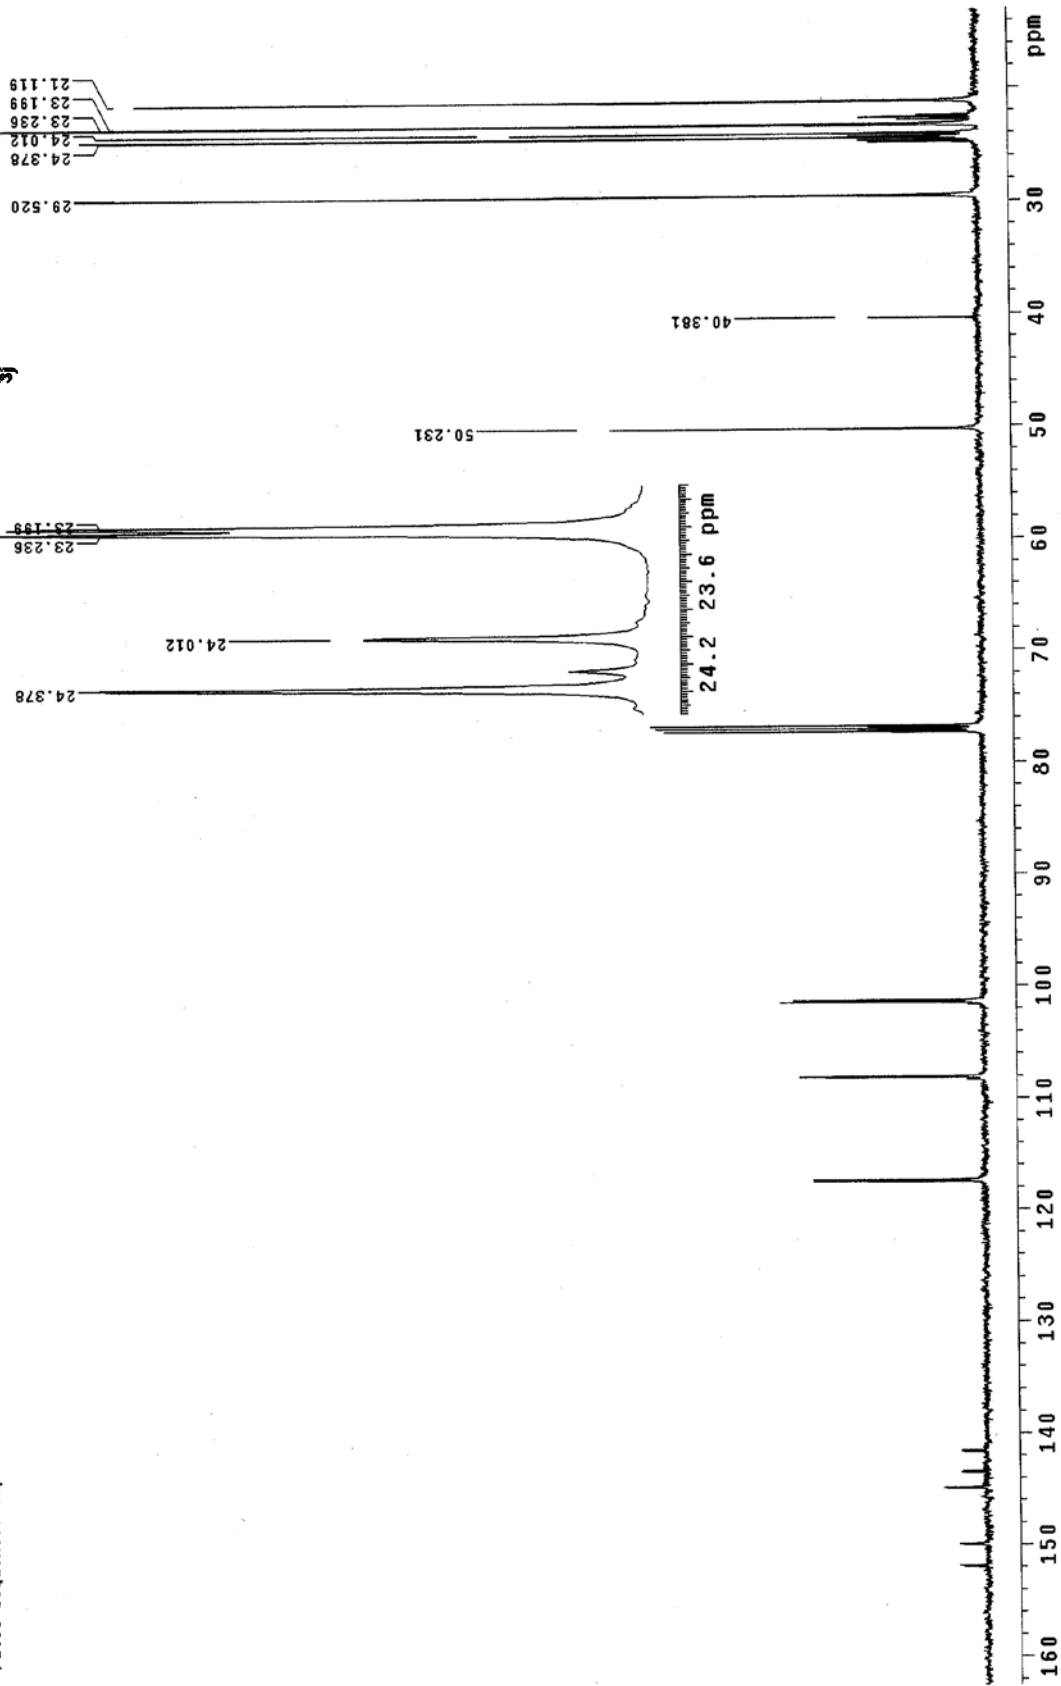

UNAM, Instituto de Química. (H. Ríos)  
Dr-A-Cabrera/Laura-R.P.  
Clave: Reacc952  
No. Registro: 996  
Experimento: Hidrogeno  
Disolvente: CDCl3  
VarianInova-500MHz (S)  
Abril-14-2009

File: std1h

Pulse Sequence: s2pul

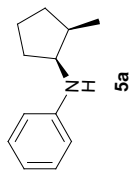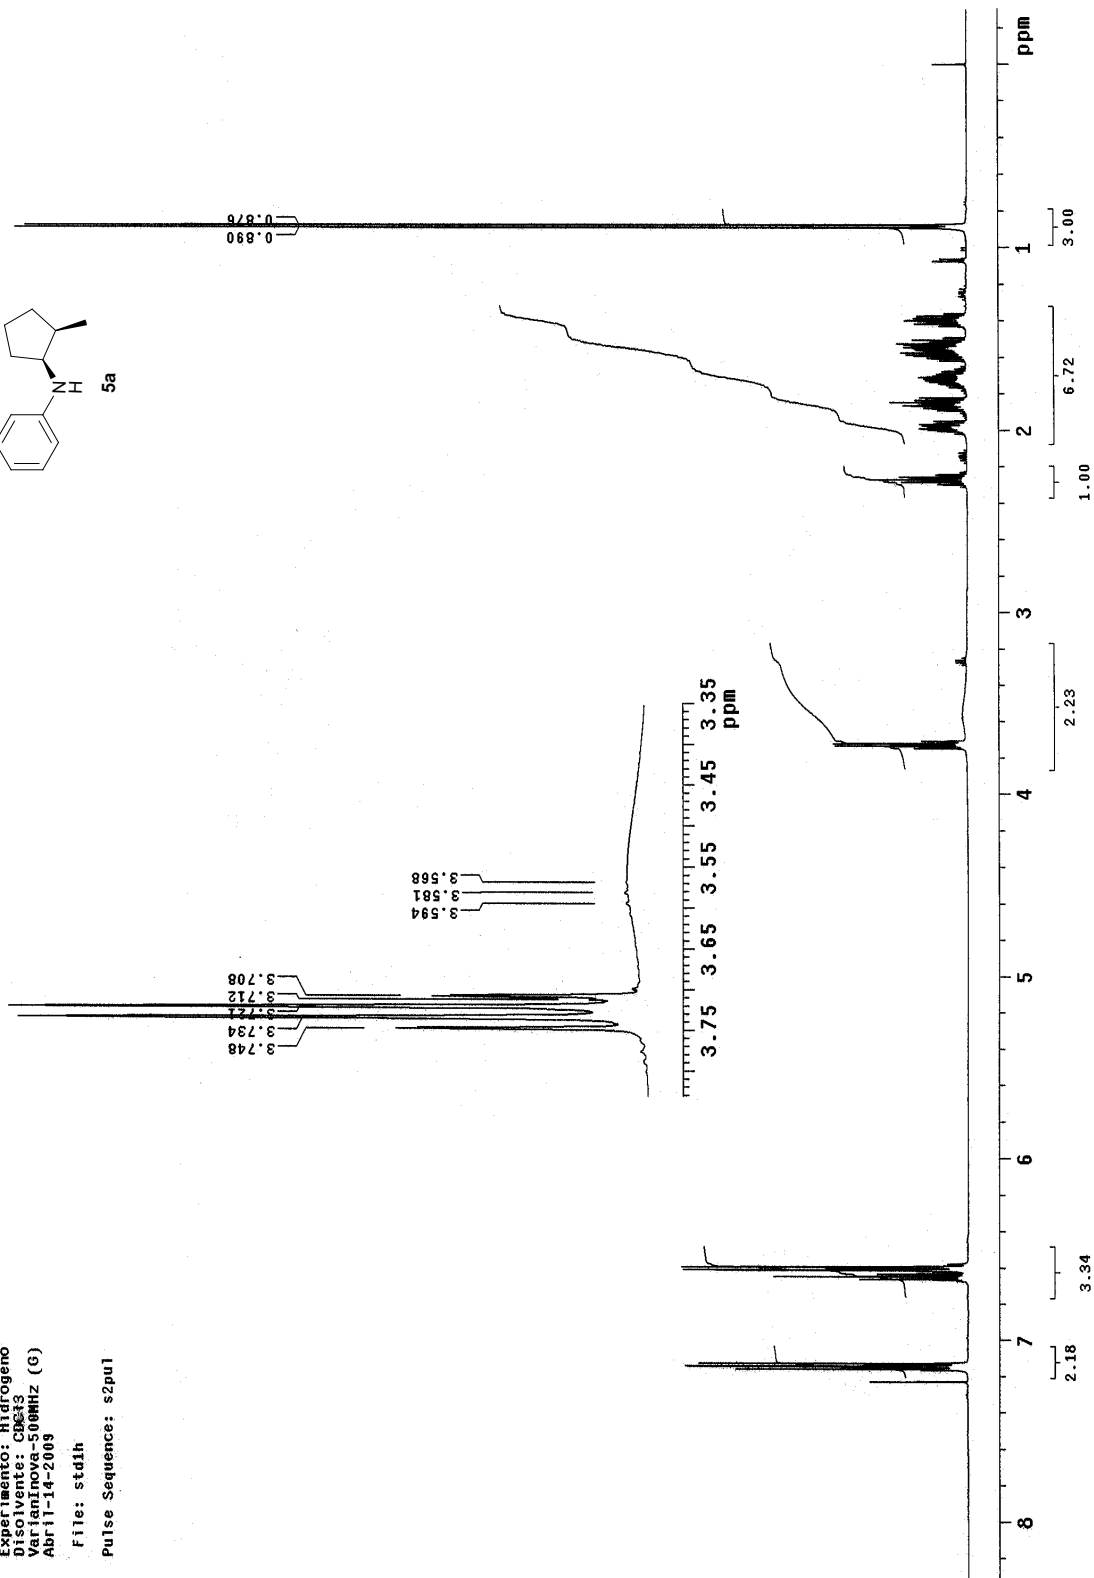

UNAM. Instituto de Química (H. Ríos)  
Dr-A-cabrera/laura-R.P  
Clave: Reacc352  
No. Registro: 996  
Experimento: C13  
Disolvente: CDCl3  
UnityInova-125.71MHz (G)  
Abr11-14-2009

File: Carbon

Pulse Sequence: s2pu1

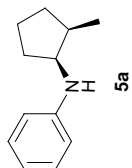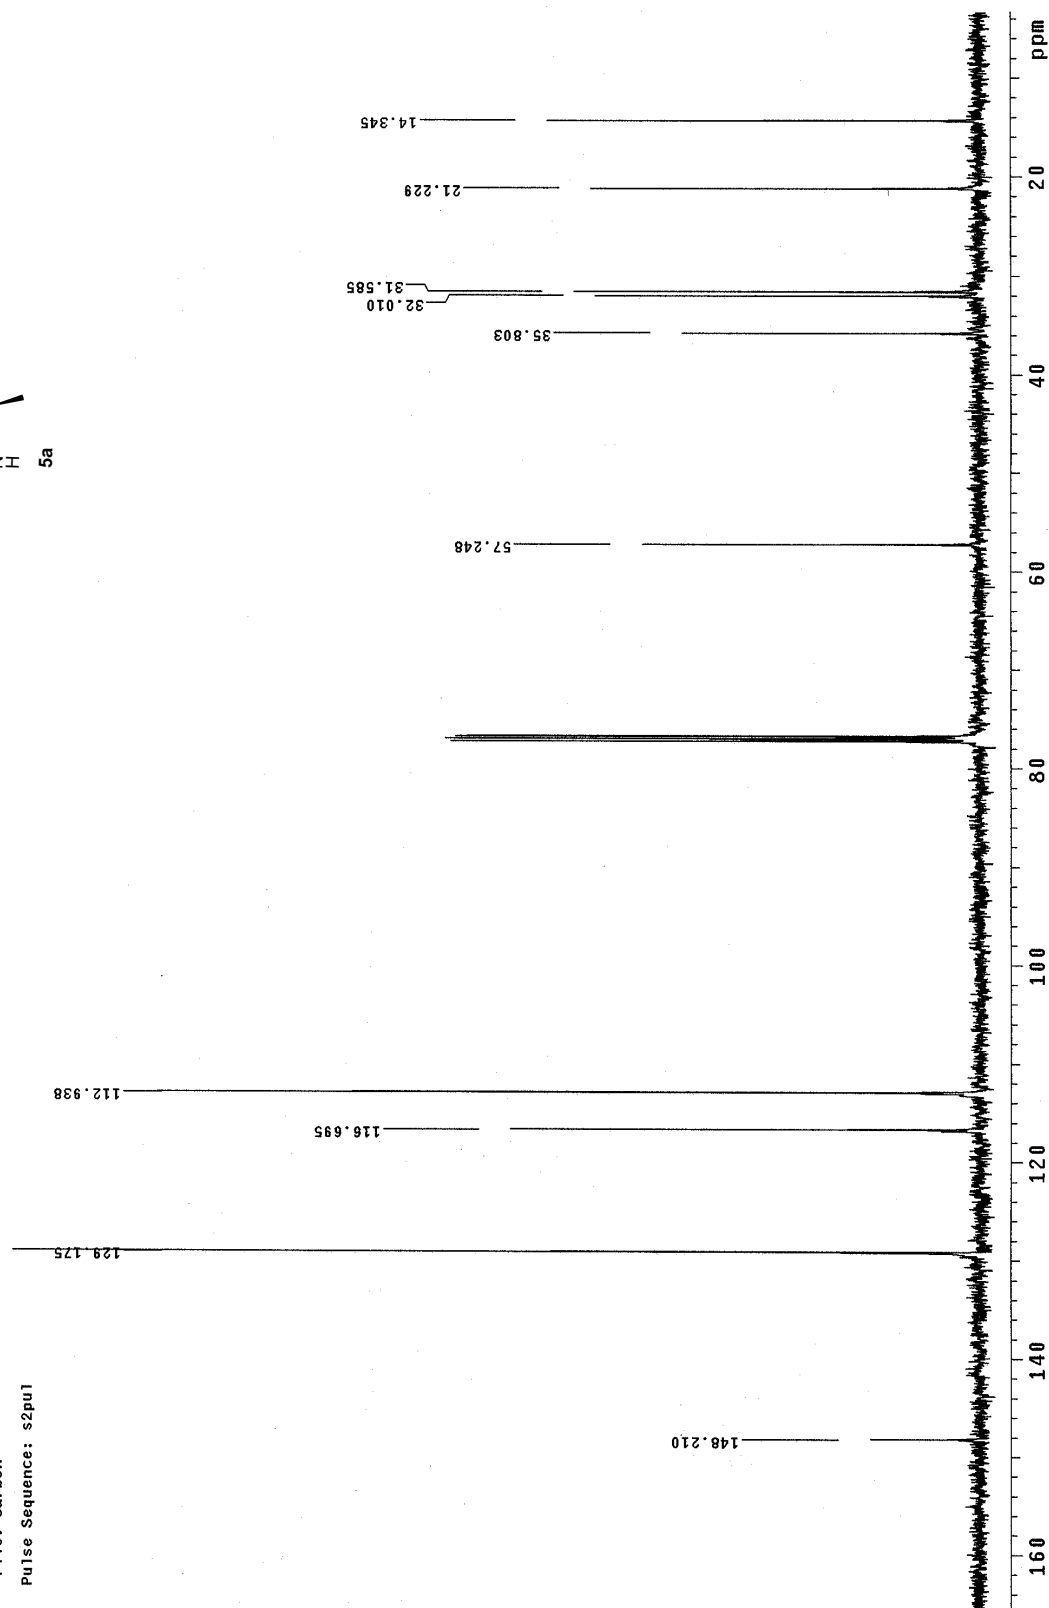



UNAM, Instituto de Química. (H. Ríos)  
Dr-A-Cabrera/Laura-K.P  
Clave: Reacc352  
No. Registro: 396  
Experimento: Dept  
Carilini/125.7 MHz (G)  
Abr11-14-2008

File: Dept

Pulse Sequence: DEPT

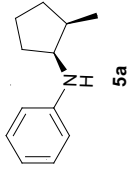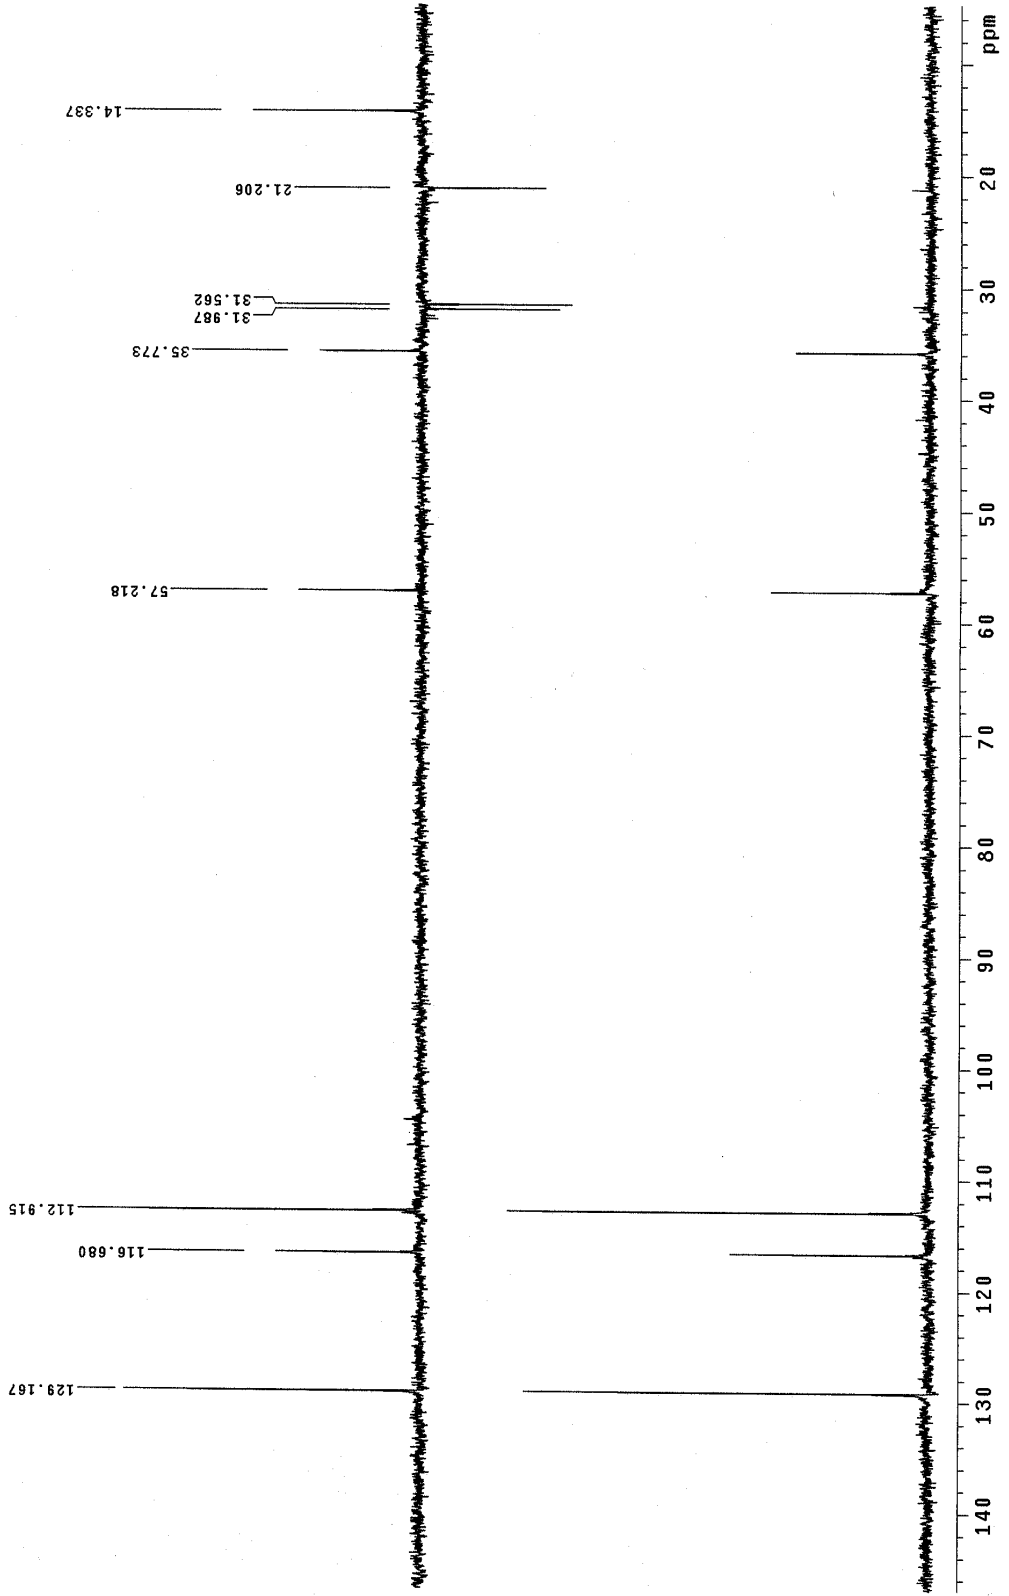

UNAM. Instituto de Quimica. (H. Rios)  
Dr-A-Cabrera/Laura-R.P  
Clave: Reacc52  
Mo. Registro: 986  
Experimento: HSQC  
Disolvente: CDCl3  
Varian/ova-500MHz (G)  
Abril-14-2009  
File: gHSQC  
Pulse Sequence: gHSQC

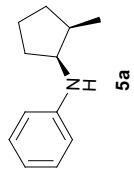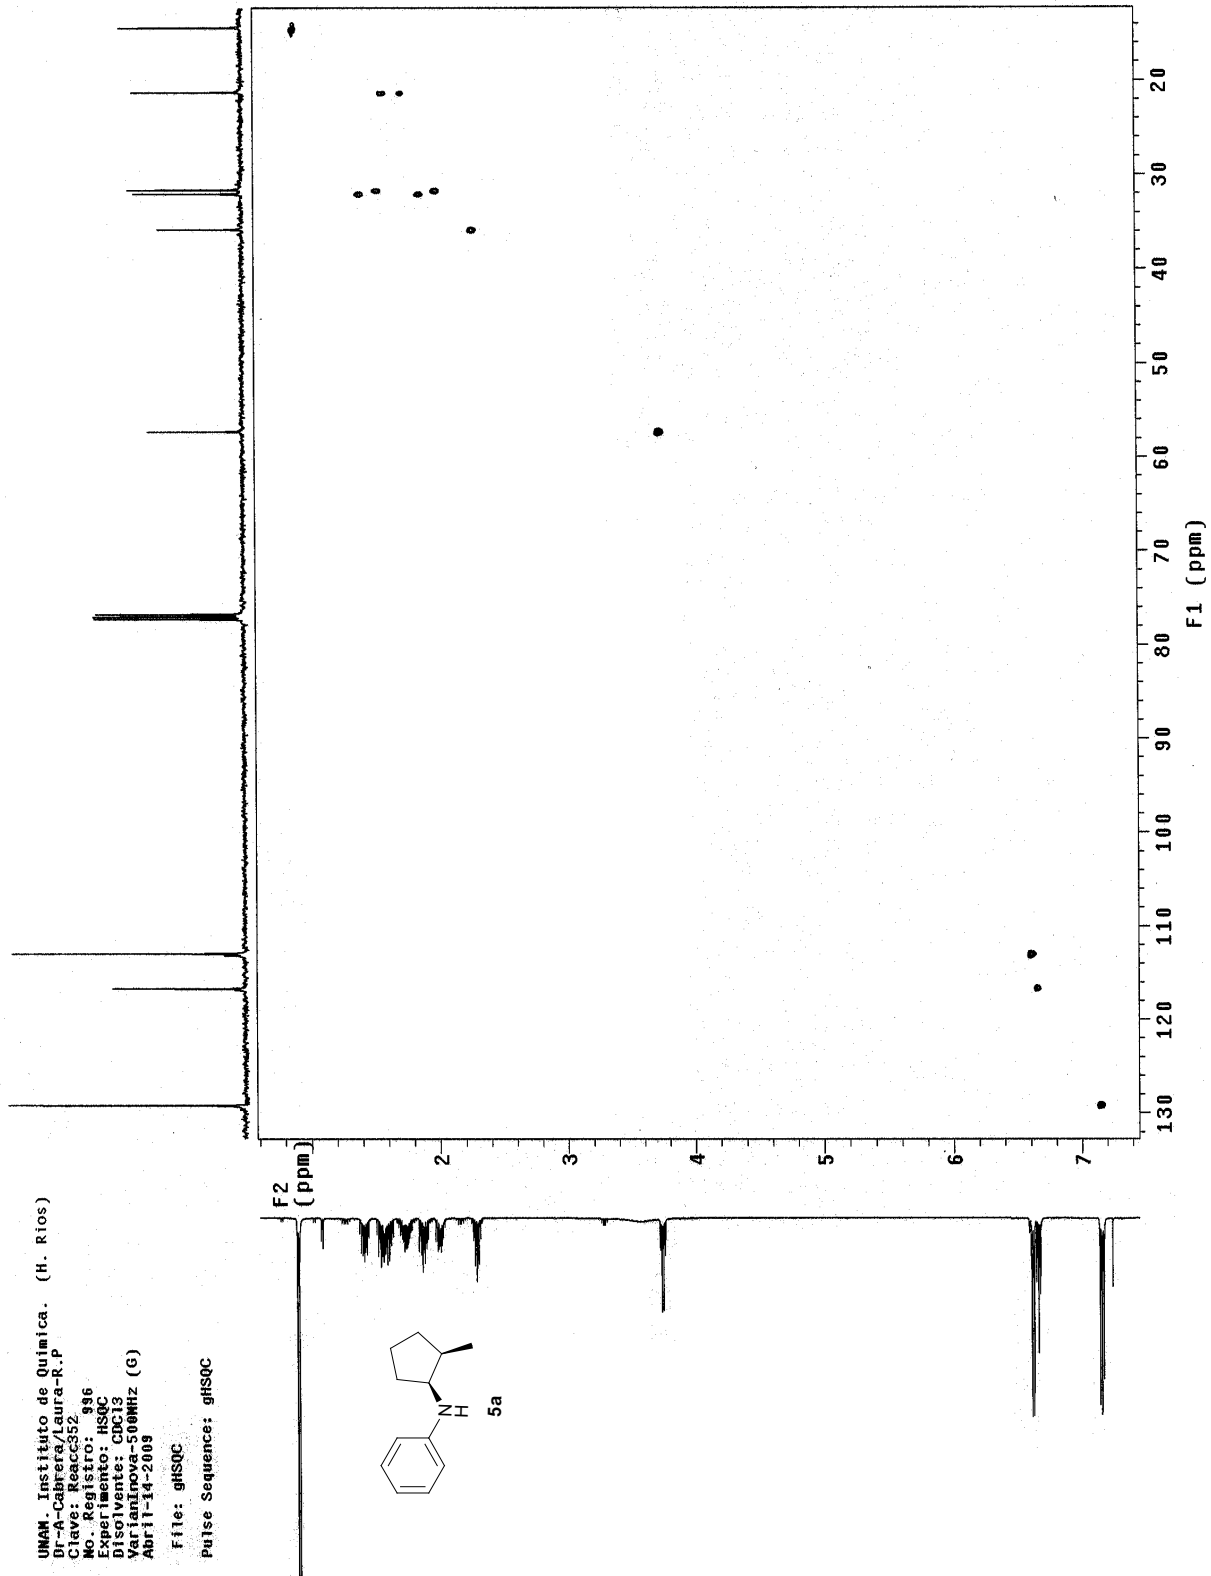

UNAM. Instituto de Quimica.  
Dr-A-Cabrera/Laura-R.P  
Clave: Reacc352  
No. Registro: 996  
Experimento: Noesy  
Disolvente: CDCl3  
Variante: 500MHZ (G)  
Abril-14-2009

Pulse Sequence: noesy

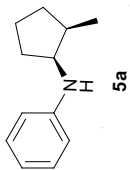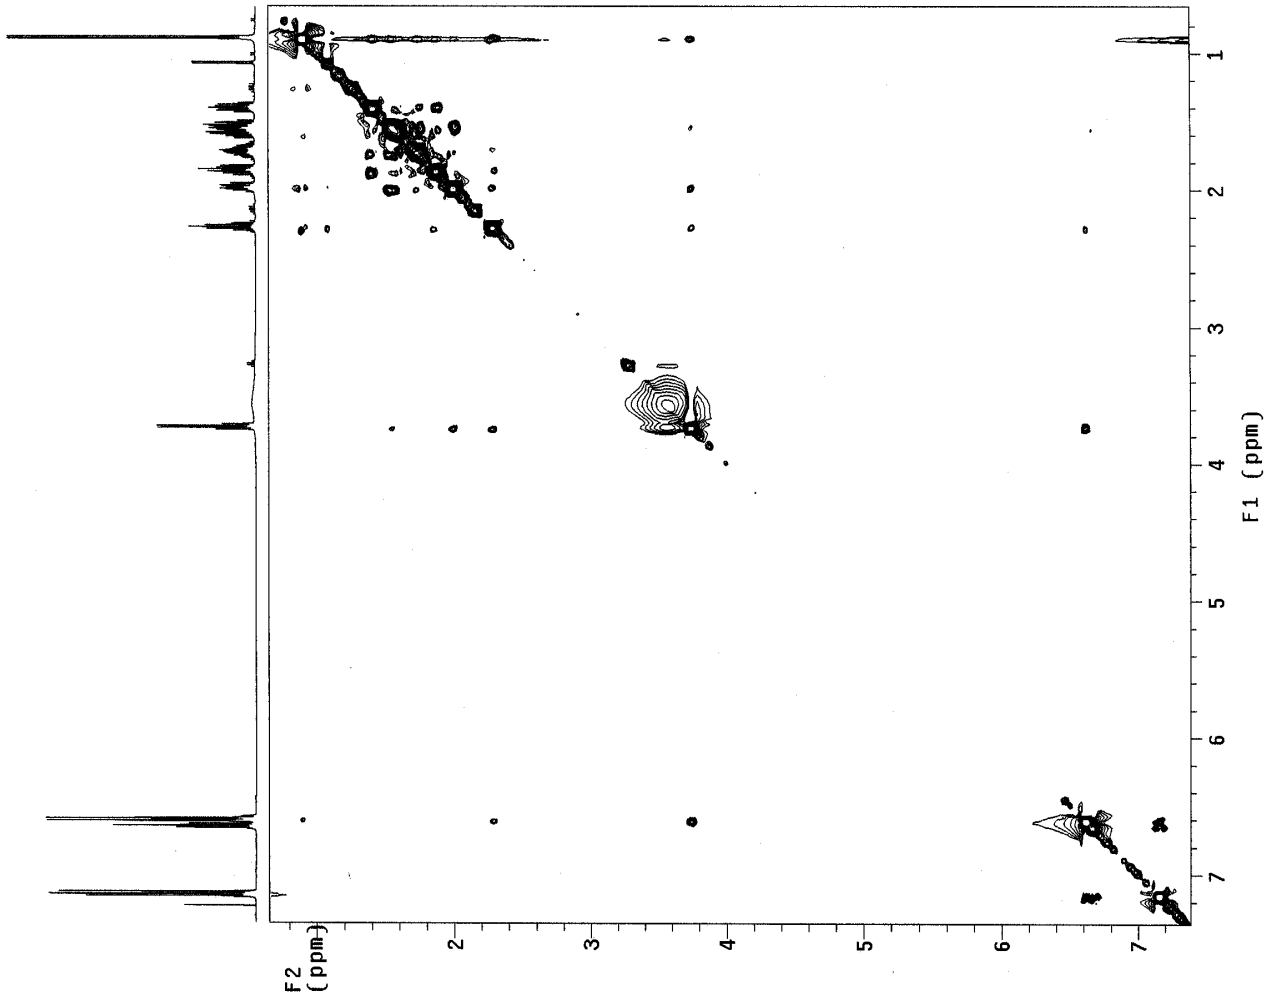

UNAH. Instituto de Quimica.  
Dr.-A-Cabrera/Laura-R.P  
Clave: Reacc352  
No. Registro: 996  
Experimento: Nocsy  
Disolvente: CDCl3  
Varianinova-500MHz (G)  
Abr11-14-2009  
Pulse Sequence: nocsy

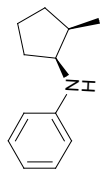

5a  
NOE-Expansions

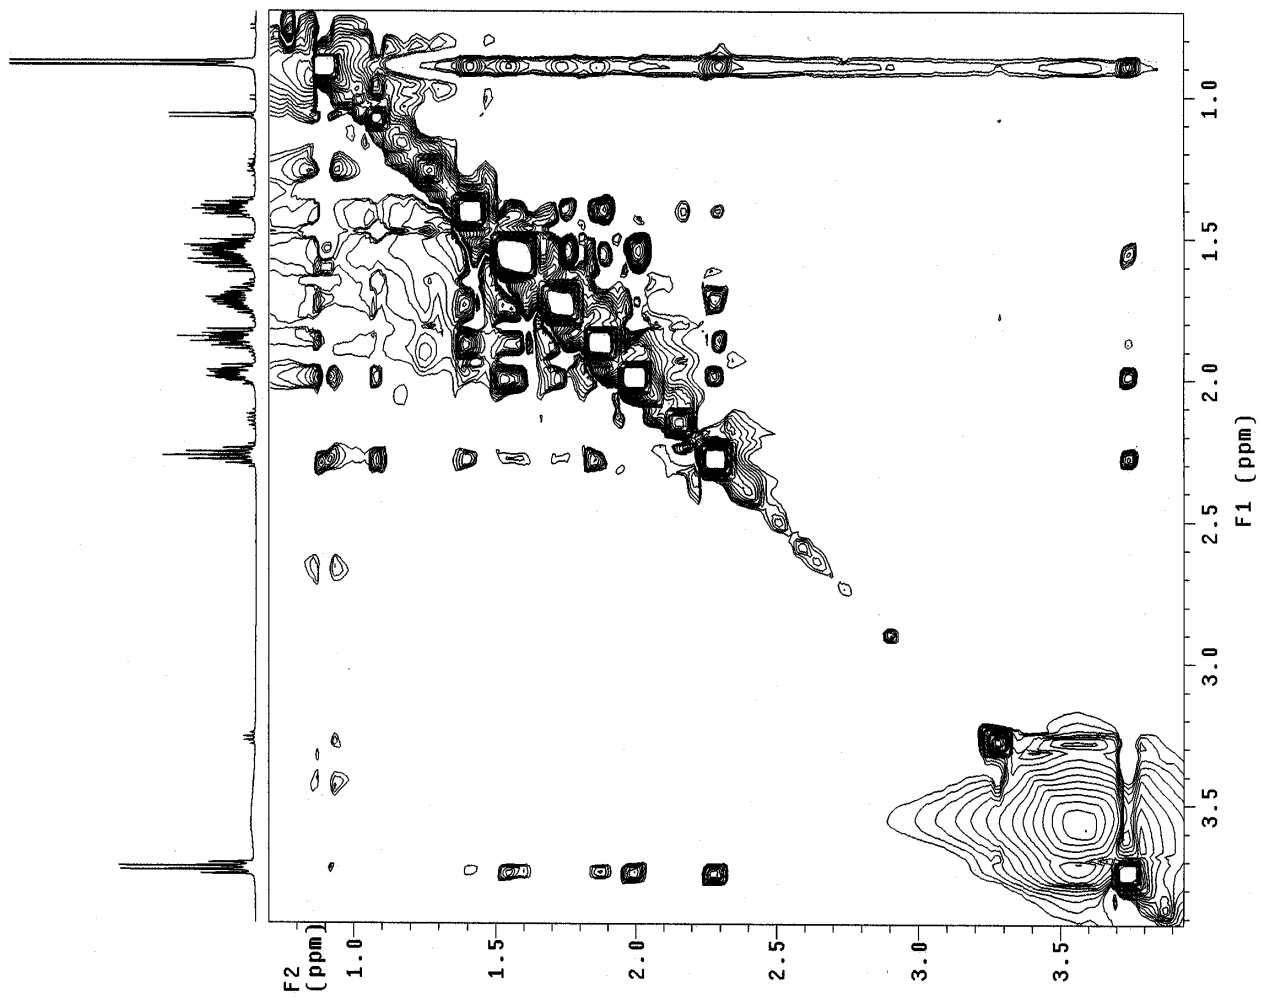

[ TIC ]  
 Data : Dr-Cabrera-Armando-962 Date : 16-Feb-120 16:27  
 Sample: 405 G reacc 321-rac AX505HA  
 Note :  
 Inlet : GC Ion Mode : EI+  
 Ion Species : Normal Ion TIC Range : m/z 5 to 650

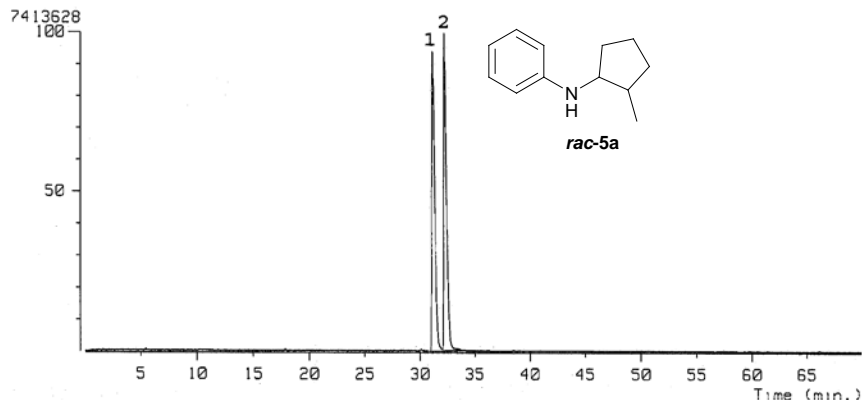

[ TIC ]  
 Data : Dr-Cabrera-Armando-870 Date : 23-Nov-107 12:41  
 Sample: 2324 G Reacc 352 AX505HA  
 Note :  
 Inlet : GC Ion Mode : EI+  
 Ion Species : Normal Ion TIC Range : m/z 5 to 650

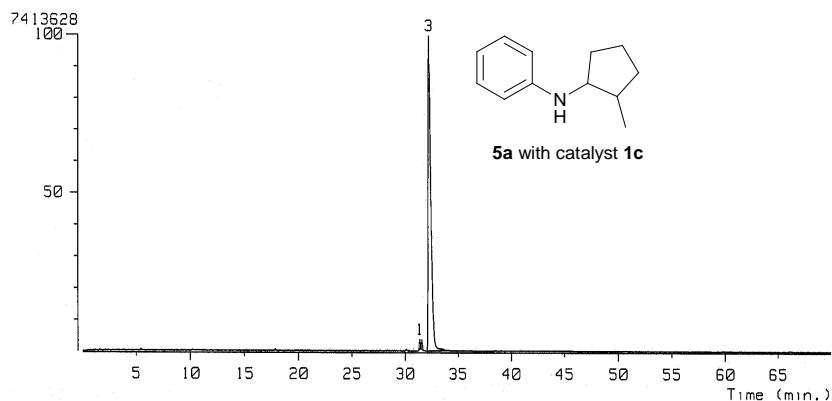

| No. | RT[min] | Area     | Area% | Height | Height% | Width[sec] | INTEG |
|-----|---------|----------|-------|--------|---------|------------|-------|
| 1   | 31.35   | 135.68   | 1.06  | 22.01  | 2.95    | 5.79       | BB    |
| 2   | 31.55   | 135.08   | 1.05  | 20.51  | 2.75    | 6.18       | BB    |
| 3   | 32.24   | 12542.16 | 97.89 | 704.79 | 94.31   | 16.71      | BB    |

[ TIC ]  
 Data : Dr-Cabrera-Armando-870 Date : 23-Nov-107 12:41  
 Sample: 2324 G Reacc 352 AX505HA  
 Note :  
 Inlet : GC Ion Mode : EI+  
 Ion Species : Normal Ion (MF-Linear) Output RT Range : 0.00 to 69.99 min  
 TIC Range : m/z 5 to 650

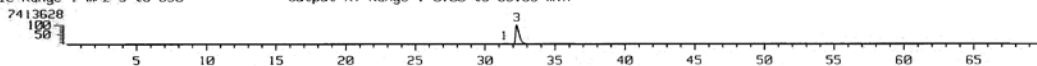

[ Mass Spectrum ]  
 RT : 31.55 min Scan# : 2367-2368-23 Temp : 0.0 deg.C  
 Ion Mode : EI+ Int. : 9.09

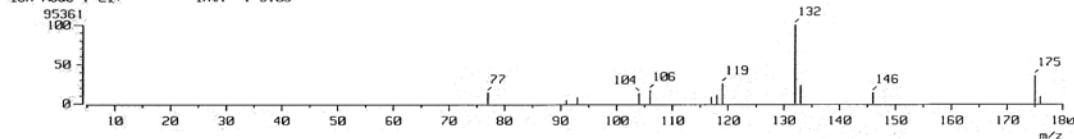

[ Mass Spectrum ]  
 RT : 32.24 min Scan# : 2419-2403-2555 Temp : 0.0 deg.C  
 Ion Mode : EI+ Int. : 219.25

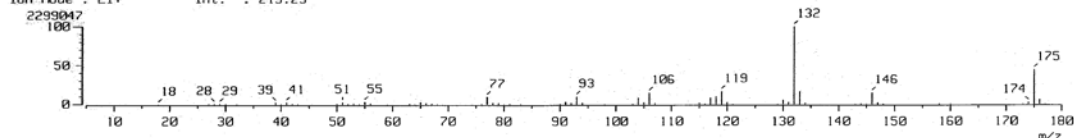

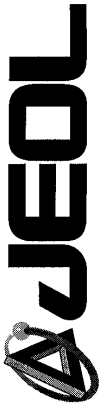

Reacc507-2F1011-1H-9.jdf

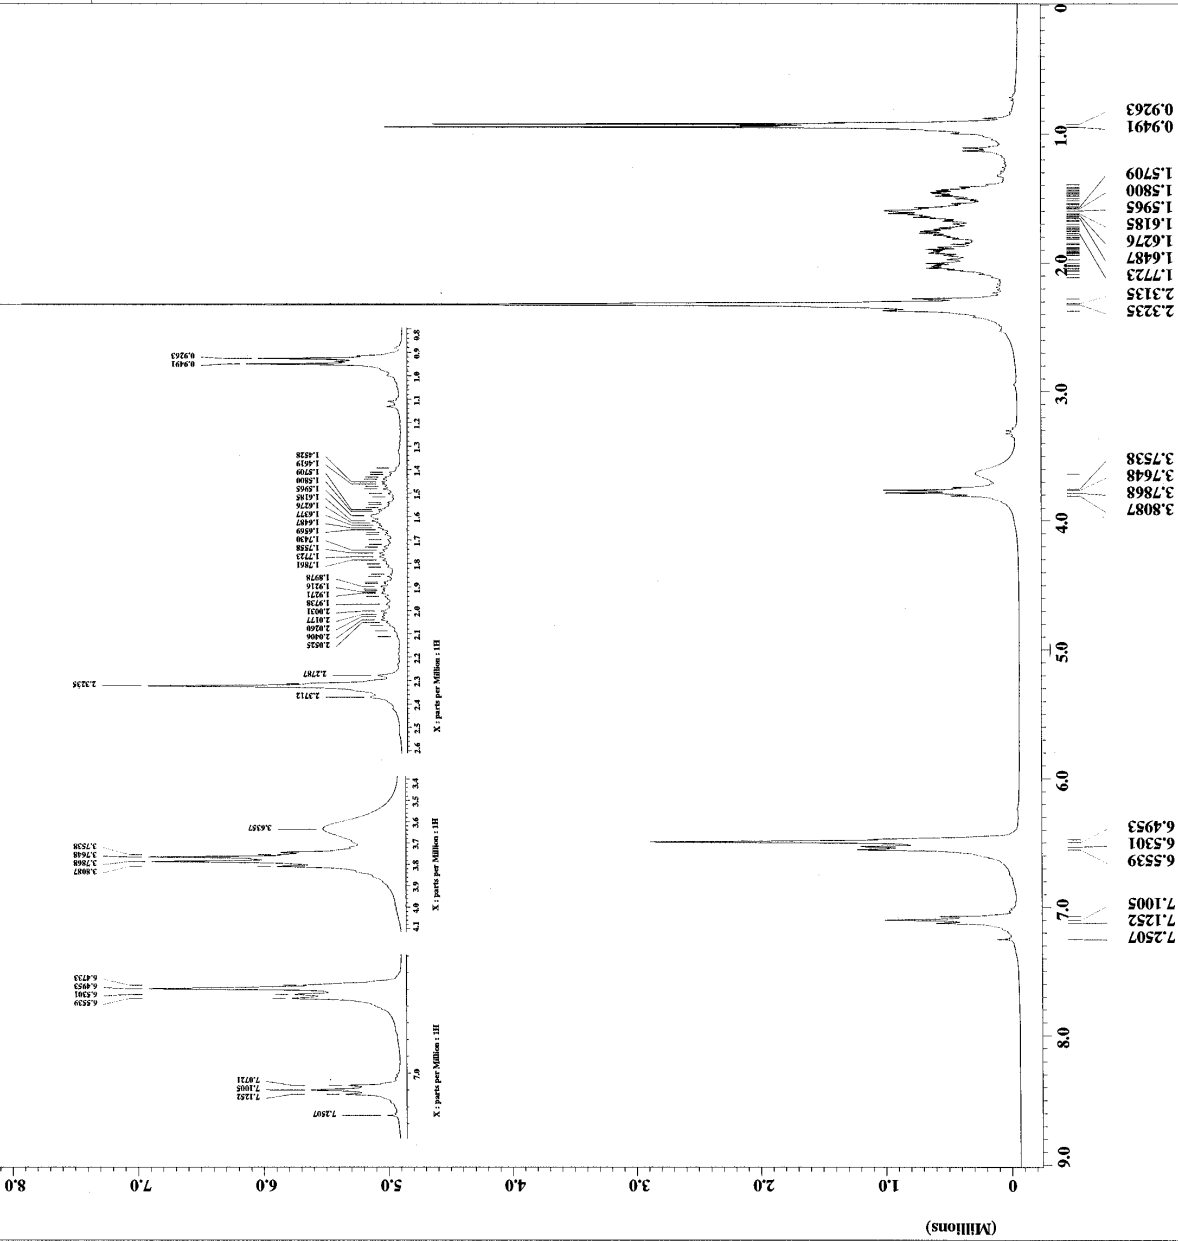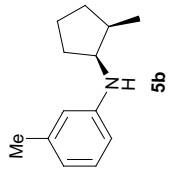

```

Filename = Reacc507-2F1011-1H-9.
Author = Cabrera
Experiment = single_pulse.exp
Sample_id =
CURPROG =
PULPROG = zgpg30
Date_ Acquired = 30-NOV-2008 01:58:16
Revision_time = 11-NOV-2008 09:10:14
Current_time = 11-NOV-2008 09:12:23
Comment = Single Pulse Experiment
Data format = 1D COMPLEX
Dim_size = 16384
Dim_title =
Dim_units = 1H
Dimensions = X
Site = Eclipse+ 300
Spectrometer = DELTA_NMR
Field_strength = 7.0586013[T] (300 [MEZ]
X_acq_duration = 3.6339712[s]
X_domain = 1H
X_freq = 300.52965592[MEZ]
X_offset = 5[ppm]
X_points = 16384
X_prescans = 0
X_resolution = 0.27518105[Hz]
X_sweep = 4.50856628[kHz]
Clipped = FALSE
Mod_return = 1
Scans = 32
Total_scans = 32
X_90_width = 9.5[us]
X_acq_time = 3.6339712[s]
X_angle = 45[deg]
X_pulse = 4.75[us]
initial_wait = 3[s]
Phase_preset = 15
Recv_start = 1[s]
Relaxation_delay = 19.6[dc]
Temp_set = 2[us]
Unblank_time = 2[us]
  
```

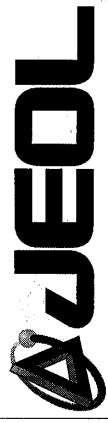

```

File Name      = Reacc507-2F1011-13C-5
Author        = Cabrera
Experiment    = single_pulse_dec
Sample ID     = Laura
Solvent      = CHLOROFORM-D
Creation time = 30-AUG-2008 01:55:08
Revision time = 11-NOV-2008 09:03:55
Current time  = 11-NOV-2008 09:04:48

Comment       = Single Pulse with Bro
Data format   = 1D COMPLEX
Data size     = 32768
Dim. title    = 13C
Dim. units    = [ppm]
Dimensions    = X
Site          = Eclipse+ 300
Spectrometer  = DELTA_NMR

Field strength = 7.0586013[T] (300[MHZ]
X acq duration = 1.7334272[s]
X domain       = 13C
X freq         = 75.56823426[MHZ]
X offset       = 100[ppm]
X points       = 32768
X prescans     = 4
X resolution   = 0.57689184[Hz]
X sweep       = 18.90359168[MHZ]
Irr domain    = 1H
Irr freq      = 300.52965592[MHZ]
Irr offset    = 5[ppm]
Clipped       = FALSE
Mod_return    = 1
Scans         = 2626
Total_scans   = 2626

X_90_width    = 11.3[us]
X_acq_time    = 1.7334272[s]
X_angle       = 30[deg]
X_pulse       = 3.76666667[us]
Initial_wait  = 1[s]
Phase_preset  = 3[us]
Recvr_gain    = 30
Relaxation_delay = 1[s]
Temp_get      = 20.9[dc]
Unblank_time  = 2[us]

```

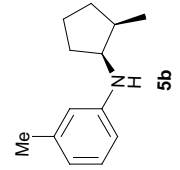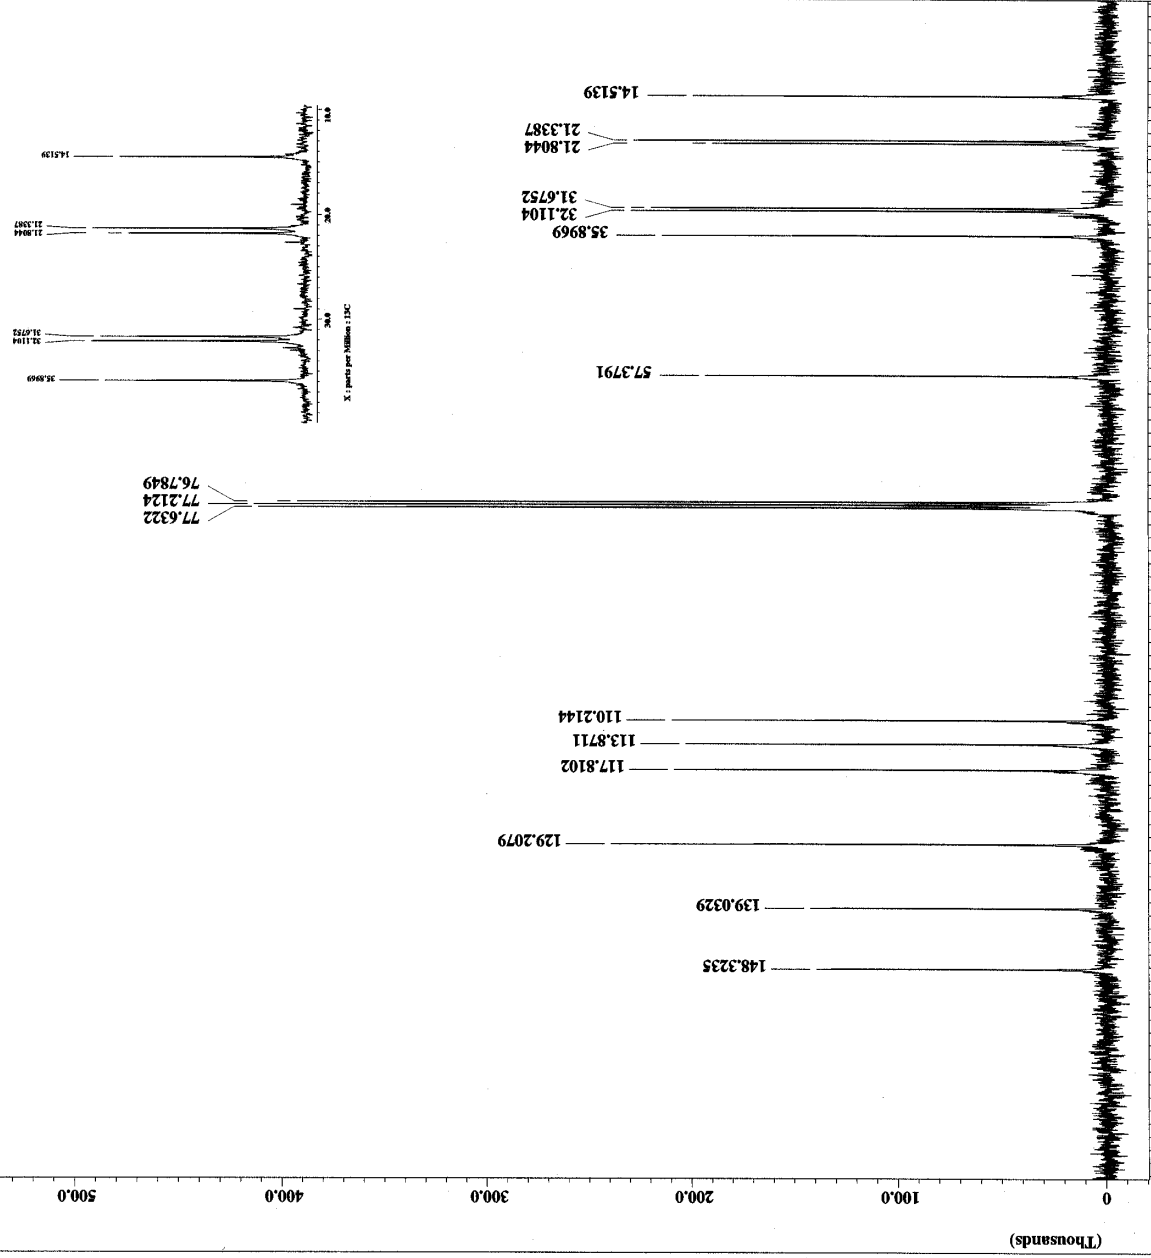

[ TIC ]

Data : Dr-Cabrera-Armando-151  
Sample: 2570 reacc 507 JeolAX505HA  
Note : 5 horas  
Inlet : GC  
Ion Species : Normal Ion

Date : 30-Oct-120 12:40  
Ion Mode : EI+  
TIC Range : m/z 33 to 650

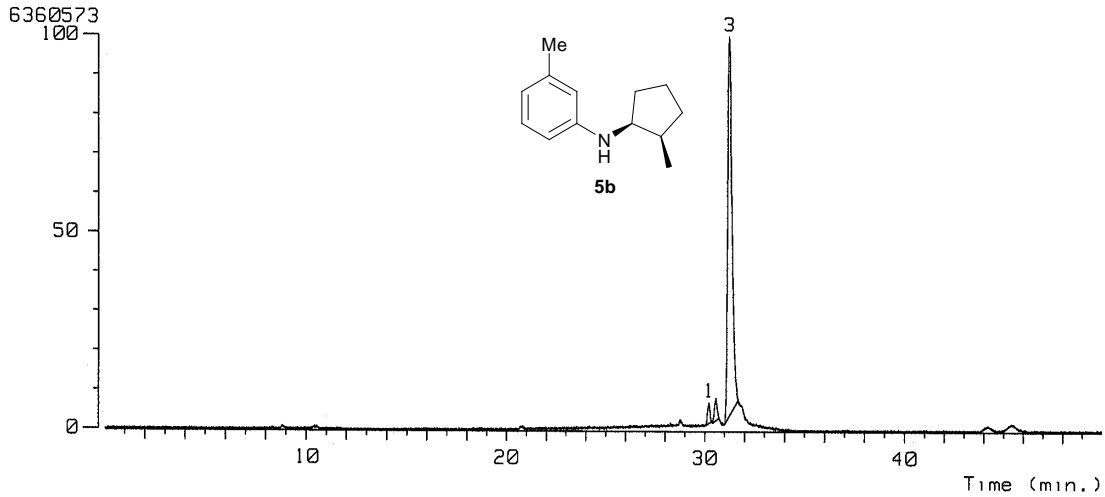

| No. | RT [min] | Area    | Area% | Height | Height% | Width [sec] | INTEG |
|-----|----------|---------|-------|--------|---------|-------------|-------|
| 1   | 30.20    | 255.25  | 2.70  | 31.90  | 4.91    | 7.51        | BB    |
| 2   | 30.56    | 317.29  | 3.36  | 34.27  | 5.28    | 8.69        | BB    |
| 3   | 31.25    | 8876.89 | 93.94 | 583.43 | 89.81   | 14.29       | BB    |

[ TIC ]

Data : Dr-Cabrera-Armando-151 Date : 30-Oct-120 12:40  
Sample: 2570 reacc.507 JeolAX505HA  
Note : 5 horas  
Inlet : GC Ion Mode : EI+  
Ion Species : Normal Ion [MF-Linear]  
TIC Range : m/z 33 to 650 Output RT Range : 0.00 to 49.99 min

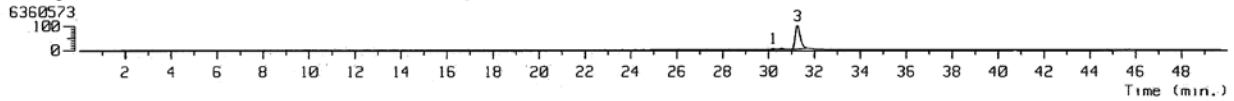

[ Mass Spectrum ]

RT : 30.56 min Scan#: 2631-2617-2645 Temp : 0.0 deg.C  
Ion Mode : EI+ Int. : 8.31

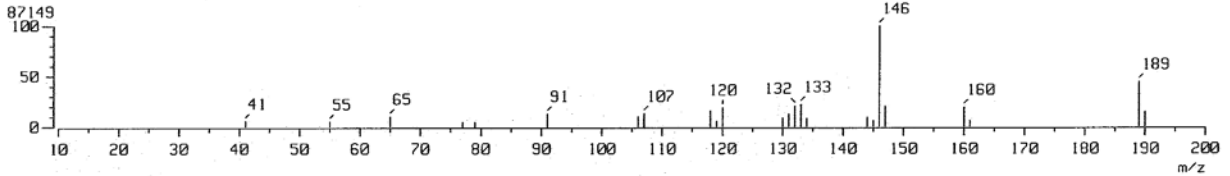

[ Mass Spectrum ]

RT : 31.25 min Scan#: 2691-2670-2727 Temp : 0.0 deg.C  
Ion Mode : EI+ Int. : 147.22

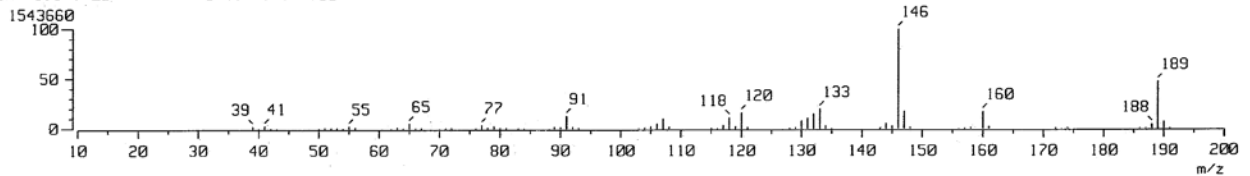



UNAM. Instituto de Química.  
 Dr-A-Cabrera/Laura-K.P  
 Clave: Reacc325129  
 No. Registro: 337  
 Experimento: H<sub>2</sub>Ogeno  
 Disolvente: CDCl<sub>3</sub>  
 Volumen: 0.5 ml  
 Fecha: 14-04-2009

File: std1h

Pulse Sequence: s2pu1

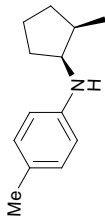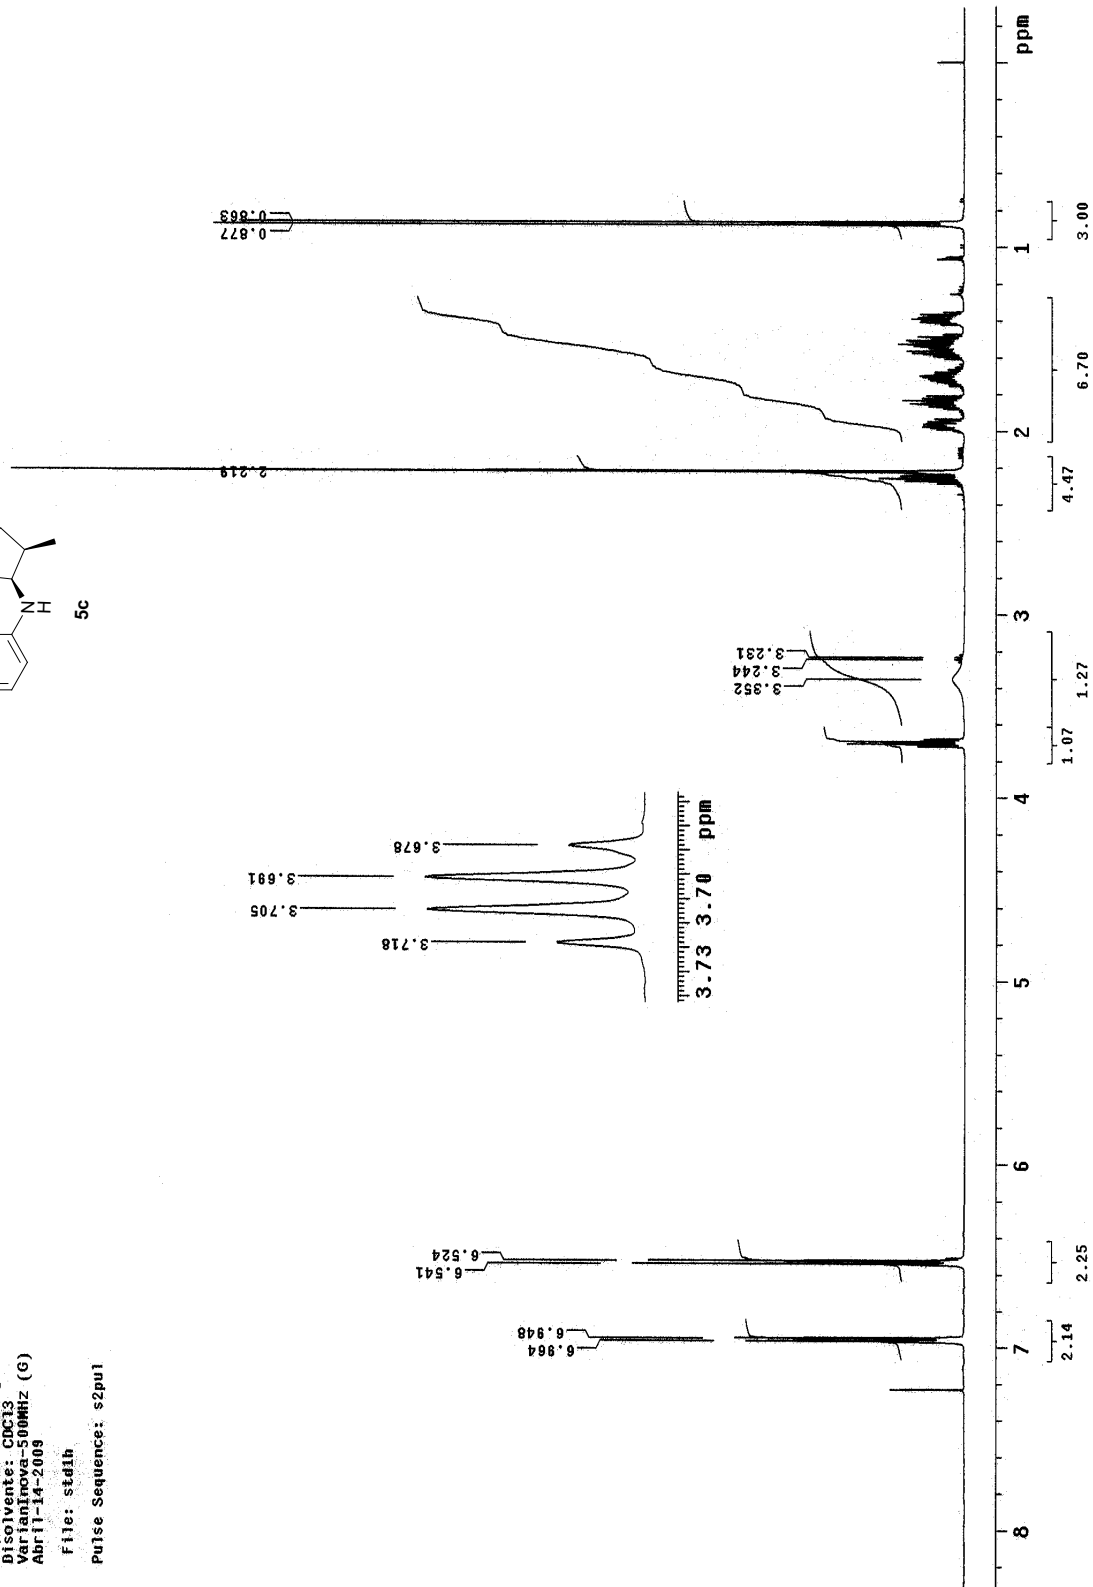

UNAM - Instituto de Química  
Dr-A-cabrera/laura-R.P  
Clave: Reacc32579  
No. registro: 33  
Fecha: 10/03/12  
Disolvente: CDCl3  
UnityInova-125.71MHZ (G)  
Abril-14-2009

File: Carbon

Pulse Sequence: s2pu1

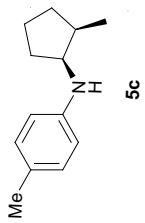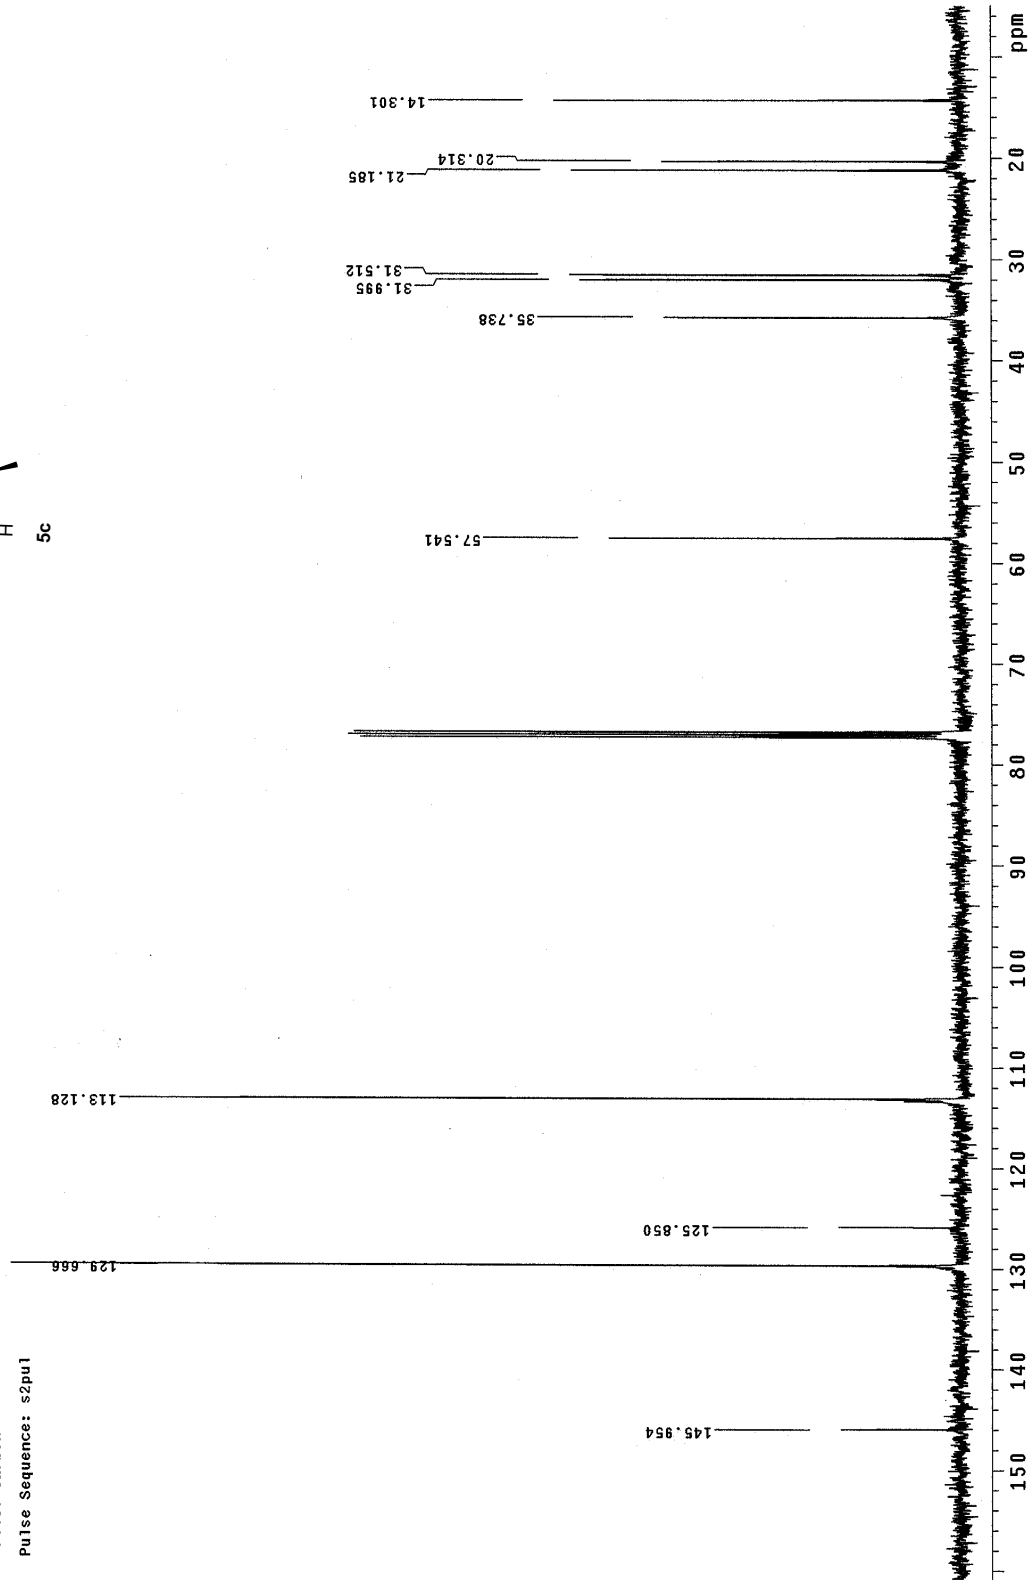

[ TIC ]

Data : Dr-Cabrera-Armando-882  
Sample: 2566 G Reacc 325 AX505HA  
Note :

Date : 06-Dec-107 12:14

Inlet : GC  
Ion Species : Normal Ion

Ion Mode : EI+  
TIC Range : m/z 5 to 650

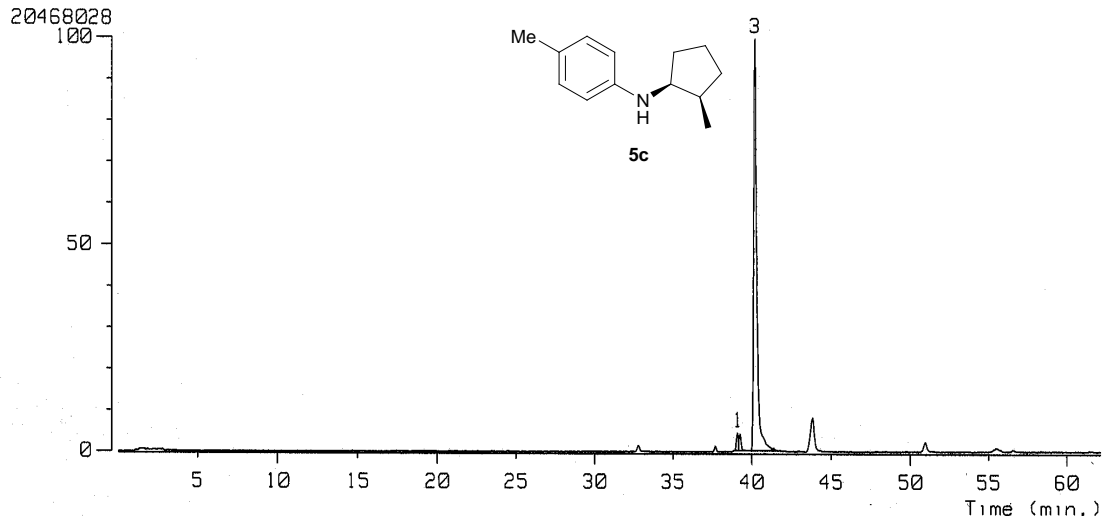

| No. | RT [min] | Area     | Area% | Height  | Height% | Width [sec] | INTEG |
|-----|----------|----------|-------|---------|---------|-------------|-------|
| 1   | 39.09    | 683.64   | 2.42  | 80.41   | 3.83    | 7.98        | BV    |
| 2   | 39.25    | 651.28   | 2.30  | 76.03   | 3.62    | 8.04        | VB    |
| 3   | 40.21    | 26923.40 | 95.28 | 1941.51 | 92.54   | 13.02       | BB    |

[ TIC ]

Data : Dr-Cabrera-Armando-882 Date : 06-Dec-107 12:14  
Sample: 2566 G Reacc 325 AX505HA  
Note :  
Inlet : GC Ion Mode : EI+  
Ion Species : Normal Ion [MF-Linear]  
TIC Range : m/z 5 to 650 Output RT Range : 0.00 to 62.19 min

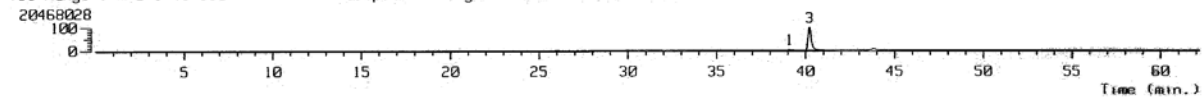

[ Mass Spectrum ]

RT : 39.25 min Scan# : 2941-2916-2962 Temp : 0.0 deg.C  
Ion Mode : EI+ Int. : 15.19

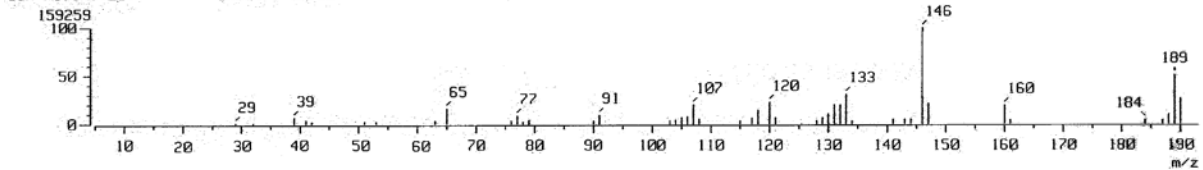

[ Mass Spectrum ]

RT : 40.21 min Scan# : 3013-2993-3123 Temp : 0.0 deg.C  
Ion Mode : EI+ Int. : 398.89

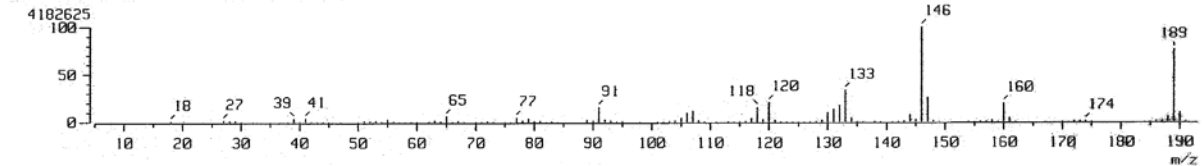

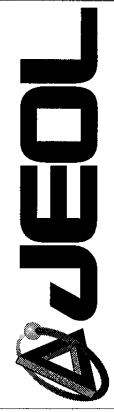

Reacc321-y-1H-3.jdf

```

Filename = Reacc321-y-1H-3.jdf
Author = Cabrera
Experiment = single_pulse.exp
Sample_id = Laura
Solvent = CHLOROFORM-D
Creation_time = 4-AUG-2008 23:12:15
Revision_time = 17-OCT-2008 07:42:20
Current_time = 17-OCT-2008 07:47:01

Comment = Single Pulse Experiment
Data_format = 1D COMPLEX
Dir_size = 16384
Dir_title = 1H
Dir_units = [ppm]
Dimensions = X
Site = Eclipse+ 300
Spectrometer = DELTA_NMR

Field_strength = 7.0586013 [T] (300 [MHz]
X_acq_duration = 3.6339712 [s]
X_gain = 1H
X_freq = 300.52965592 [MHz]
X_offset = 5 [ppm]
X_points = 16384
X_prescans = 0
X_resolution = 0.27518105 [Hz]
X_sweep = 4.50856628 [kHz]
Clipped = FALSE
Mod_return = 1
Scans = 32
Total_scans = 32

X_90_width = 9.5 [us]
X_acq_time = 3.6339712 [s]
X_angle = 45 [deg]
X_pulse = 4.75 [us]
Initial_wait = 1 [s]
Phase_preset = 3 [us]
Recvr_gain = 19
Relaxation_delay = 1 [s]
Temp_get = 19.3 [dC]
Tmbank_time = 2 [us]
  
```

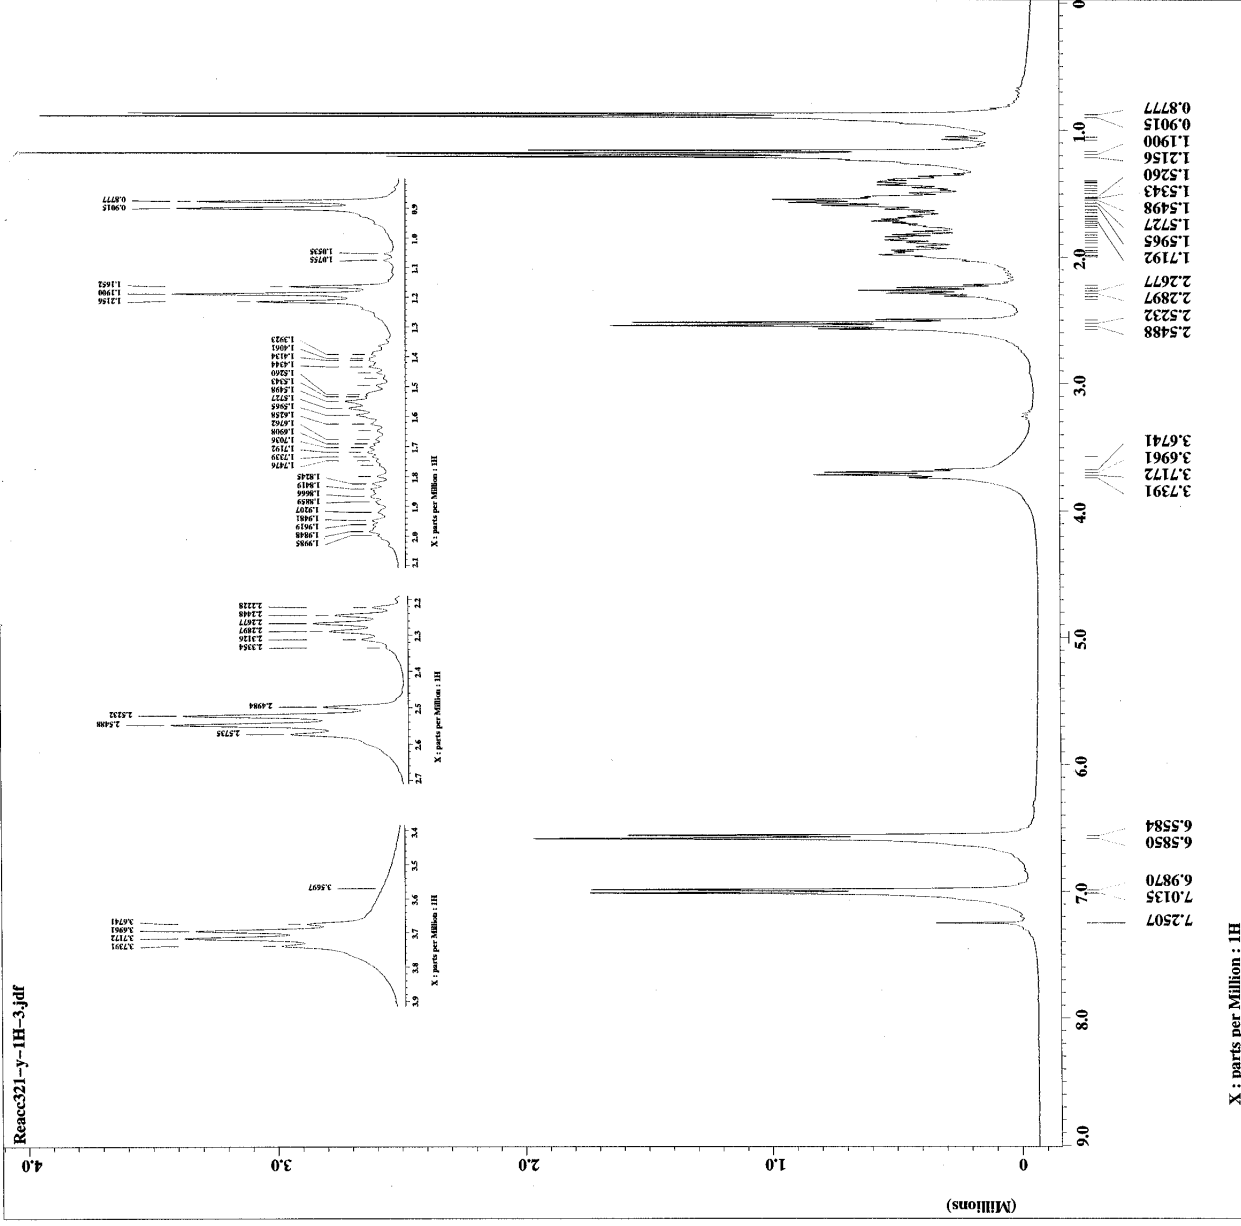

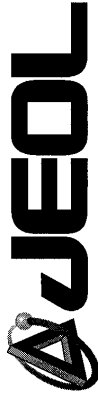

Reacc321-y-13C-5.jdf

Filename = Reacc321-y-13C-5.jdf  
Author = Cabrera  
Experiment = single\_pulse\_dec  
Sample\_id = Laura  
Solvent = CHLOROFORM-D  
Creation\_time = 5-AUG-2008 00:43:29  
Revision\_time = 17-OCT-2008 08:58:40  
Current\_time = 17-OCT-2008 08:59:38  
Comment = Single Pulse with BEO  
Data format = 1D\_COMPLEX  
Data size = 32768  
Dir title = 13C  
Dim units = [ppm]  
Dimensions = X  
Site = Eclipse+ 300  
Spectrometer = DELTA\_NMR  
Field\_strength = 7.0586013 [T] (300 [MHz])  
X\_acq\_duration = 1.7334272 [s]  
X\_domain = 13C  
X\_freq = 75.56823426 [MHz]  
X\_offset = 100 [ppm]  
X\_points = 32768  
X\_prescans = 4  
X\_resolution = 0.57689184 [Hz]  
X\_sweep = 18.90339188 [MHz]  
Xrr\_domain = 30.52965592 [MHz]  
Xrr\_freq = 5 [ppm]  
Xrr\_offset = FALSE  
Clipped = 1  
Mod return = 1976  
Total\_scans = 1976  
X\_90\_width = 11.3 [us]  
X\_acq\_time = 1.7334272 [s]  
X\_angle = 30 [deg]  
X\_pulse = 3.76666667 [us]  
Initial\_wait = 1 [s]  
Phase\_preset = 3 [us]  
Recvr\_gain = 30  
Relaxation\_delay = 1 [s]  
Temp\_get = 21 [dC]  
Unblank\_time = 2 [us]

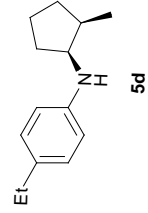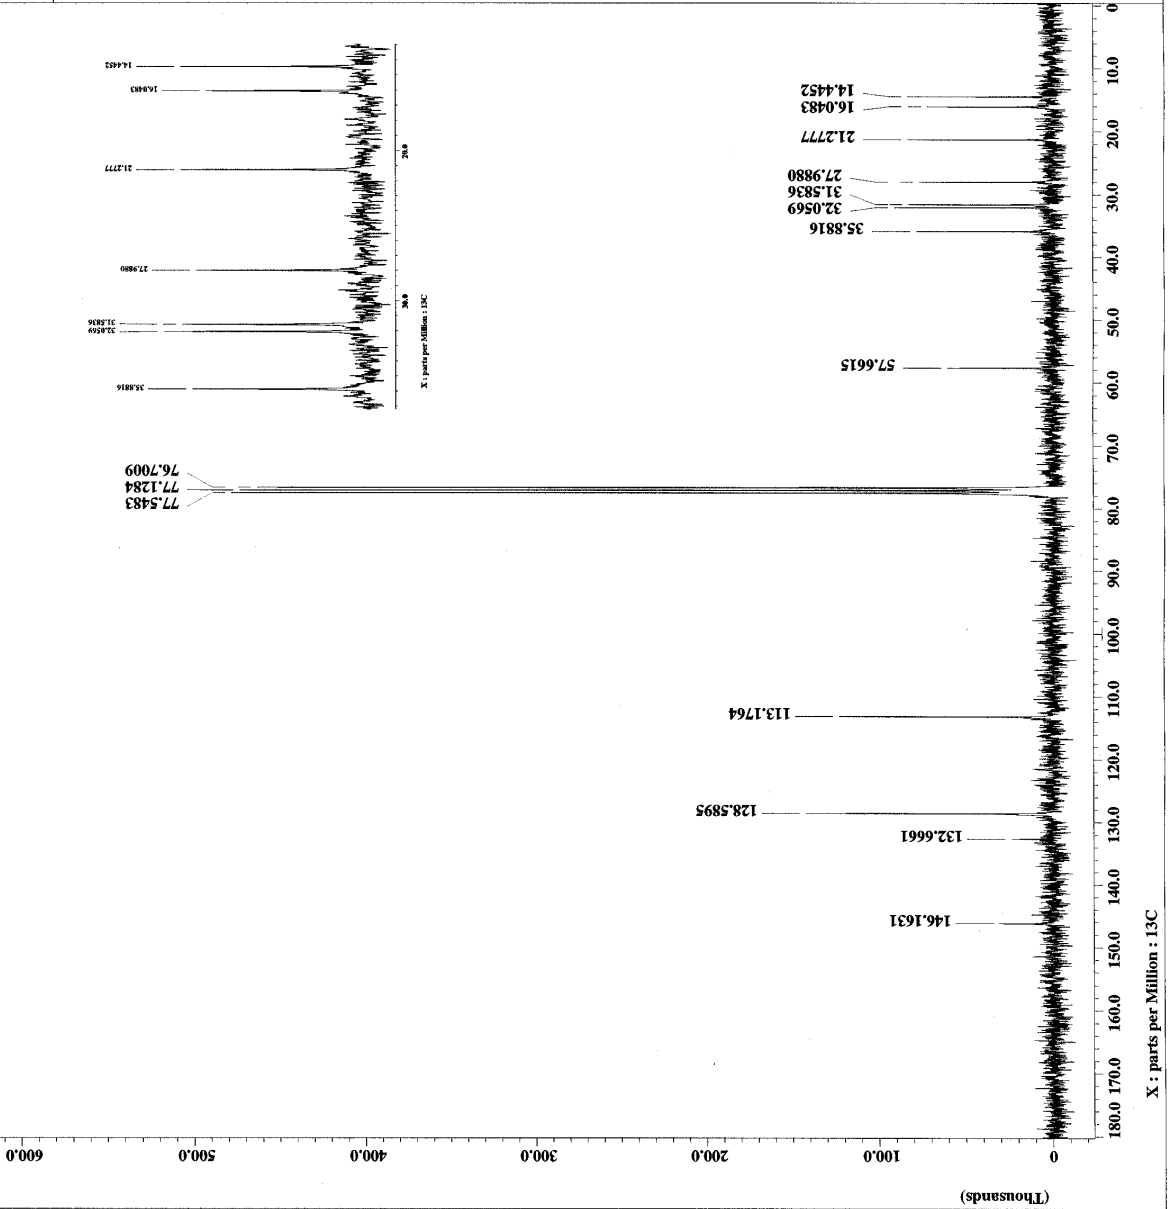

[ TIC ]  
 Data : Dr-Cabrera-Armando-137 Date : 17-Oct-120 10:08  
 Sample: 2435 G2 Reac 321 y JeolAX505HA  
 Note : 5 horas  
 Inlet : GC Ion Mode : EI+  
 Ion Species : Normal Ion TIC Range : m/z 33 to 650

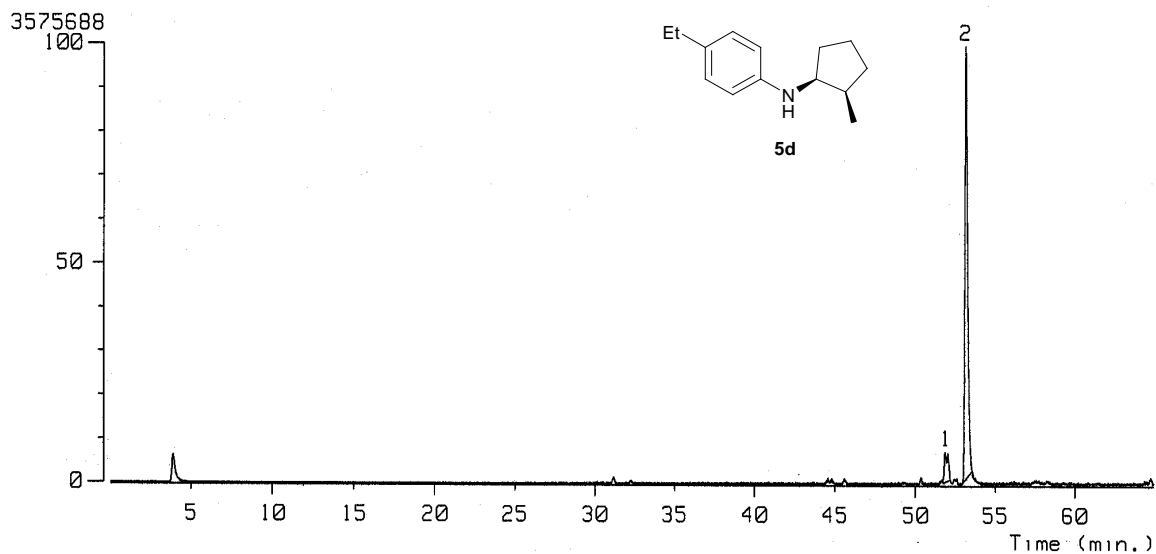

| No. | RT [min] | Area    | Area% | Height | Height% | Width [sec] | INTEG |
|-----|----------|---------|-------|--------|---------|-------------|-------|
| 1   | 51.86    | 376.07  | 8.32  | 22.97  | 6.39    | 15.37       | BB    |
| 2   | 53.16    | 4143.46 | 91.68 | 336.27 | 93.61   | 11.57       | BB    |

[ TIC ]  
 Data : Dr-Cabrera-Armando-137 Date : 17-Oct-120 10:08  
 Sample: 2435 G2 Reac 321 y JeolAX505HA  
 Note : 5 horas  
 Inlet : GC Ion Mode : EI+  
 Ion Species : Normal Ion [MF-Linear]  
 TIC Range : m/z 33 to 650 Output RT Range : 0.00 to 65.00 min

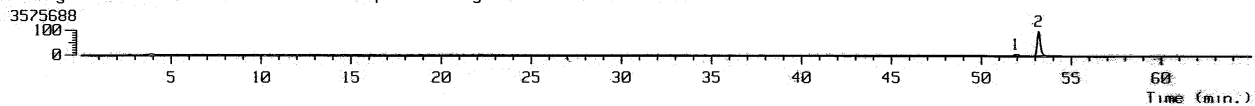

[ Mass Spectrum ]  
 RT : 51.86 min Scan# : 4465-4453-4491 Temp : 0.0 deg.C  
 Ion Mode : EI+ Int. : 4.97

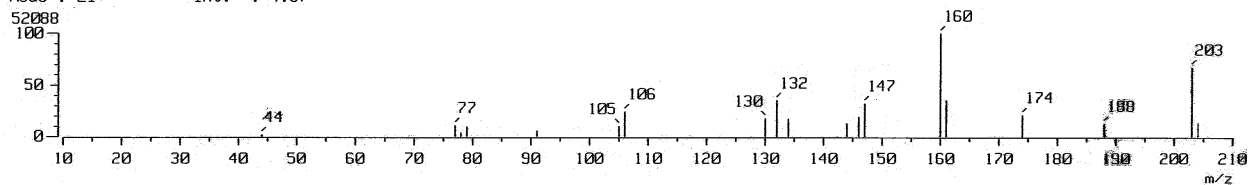

[ Mass Spectrum ]  
 RT : 53.16 min Scan# : 4577-4557-4609 Temp : 0.0 deg.C  
 Ion Mode : EI+ Int. : 69.20

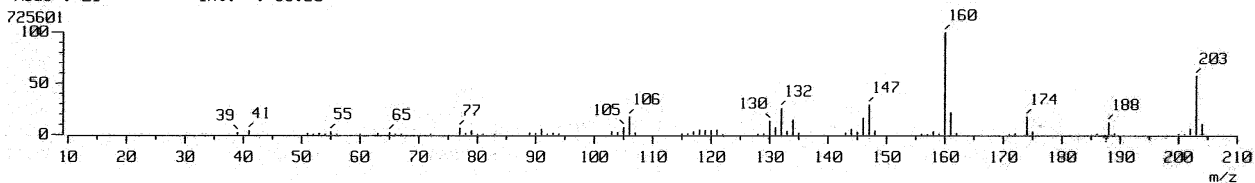



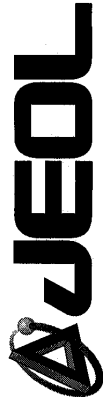

Reacc323F21-1C-6.jdf  
= Cabrera  
= single\_pulse\_dec  
= Laura  
= CHLOROFORM-D  
= 12-DEC-2007 14:18:40  
= 11-DEC-2008 12:55:12  
= 11-DEC-2008 12:57:26  
= Single Pulse with Bro  
= ID COMPLEX  
= 32768  
= 13C  
= [ppm]  
= X  
= 300  
= DELTA\_MMR  
Spectrometer  
Field strength = 7.0586013 [T] (300 [MHZ])  
X acq\_duration = 1.7334272 [s]  
X domain = 13C  
X freq = 75.56823426 [MHZ]  
X offset = 100 [ppm]  
X points = 32768  
X prescans = 4  
X resolution = 0.57689184 [MHZ]  
X sweep = 18.90359168 [MHZ]  
Irr domain = IH  
Irr freq = 300.52965592 [MHZ]  
Irr offset = 5 [ppm]  
Clipped = TRDE  
Mod\_return = 1  
Total\_scans = 4000  
X\_90\_width = 11.3 [us]  
X\_acq\_time = 1.7334272 [s]  
X\_angle = 30 [deg]  
X\_pulse = 3.76666667 [us]  
X\_pulse\_wait = 1 [s]  
X\_release\_pulse = 3 [us]  
X\_relaxation = 30 [s]  
Relaxation\_delay = 1 [s]  
Temp\_set = 17.7 [dC]  
Umbank\_time = 2 [us]

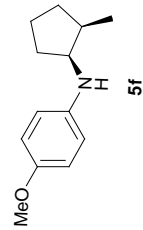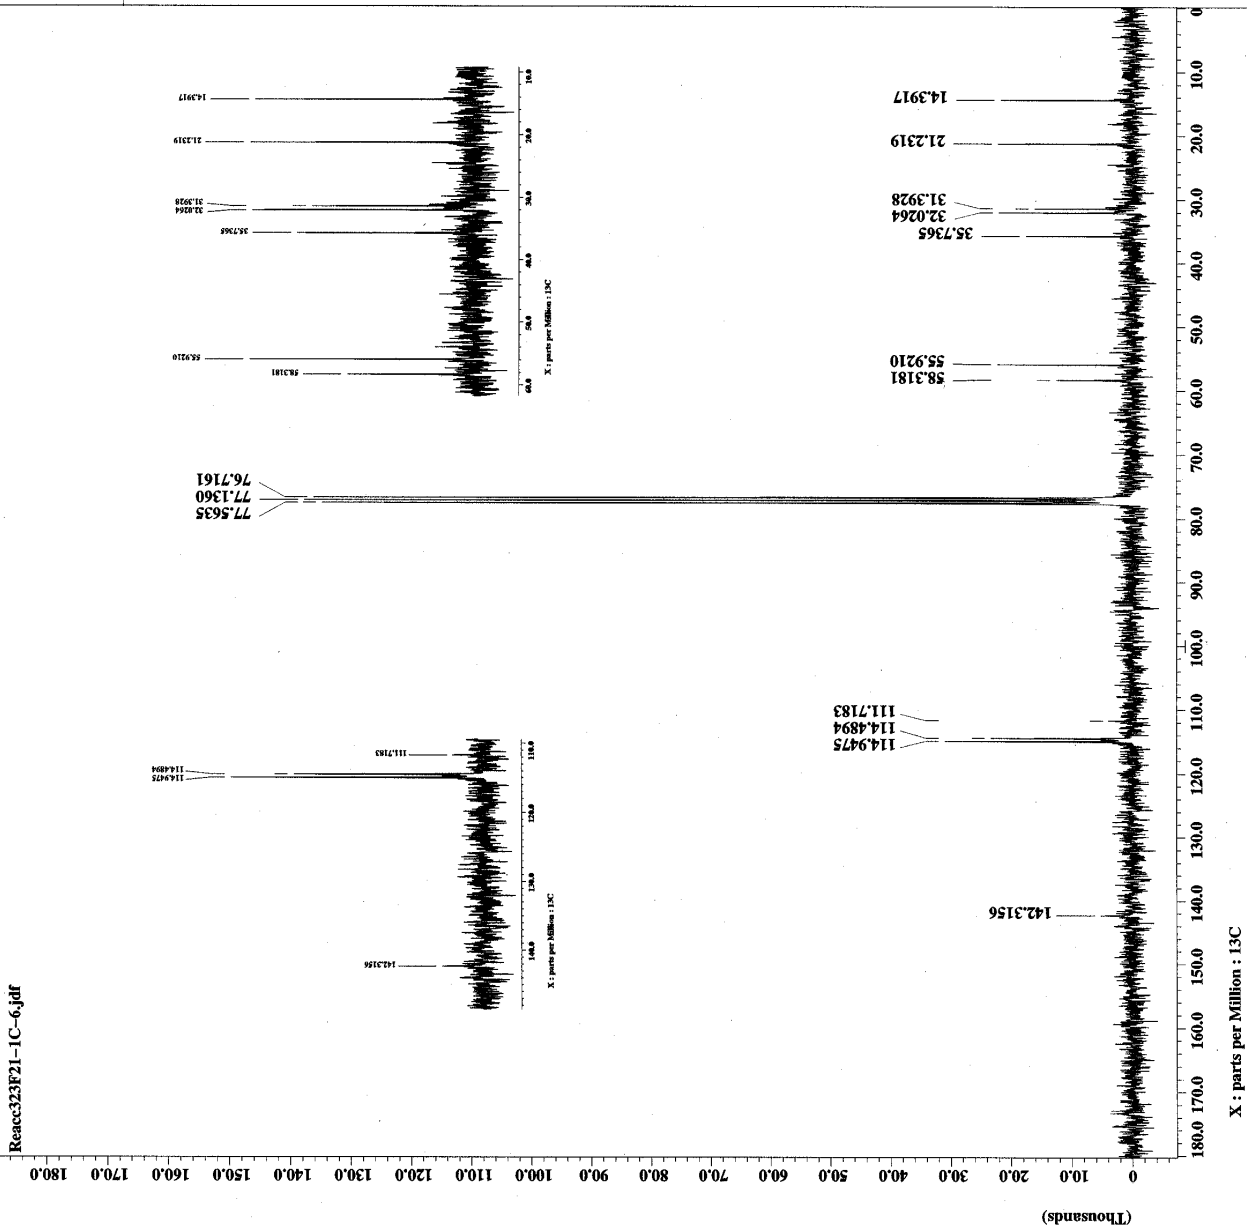



[ TIC ]

Data : Dr-Cabrera-Armando-878  
Sample: 2389 G Reacc 323 AX505HA

Date : 28-Nov-107 11:49

Note :

Inlet : GC

Ion Mode : EI+

Ion Species : Normal Ion

TIC Range : m/z 5 to 650

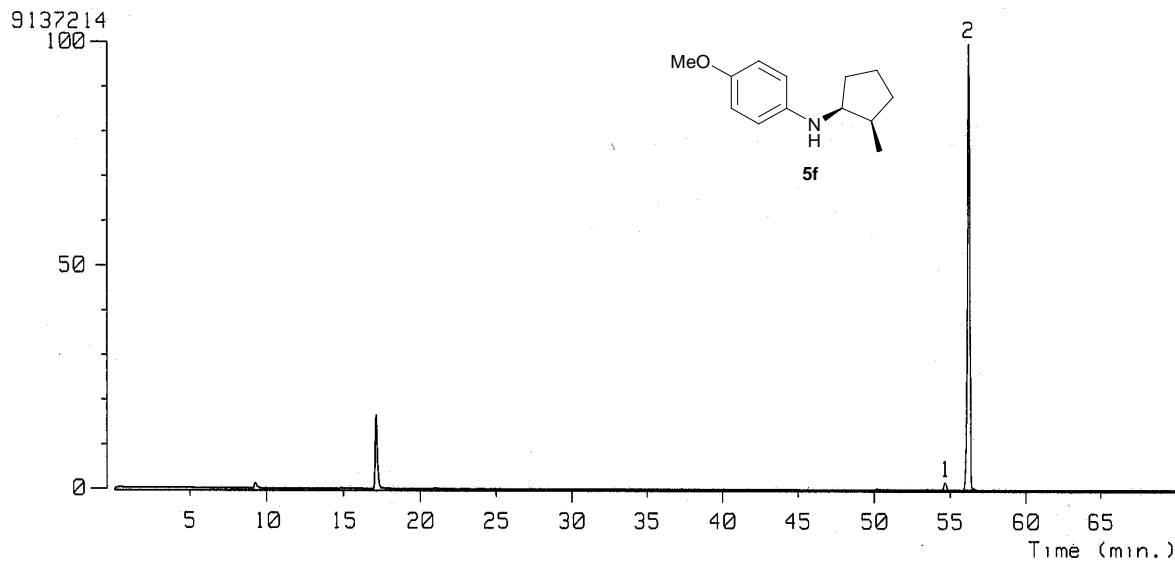

| No. | RT[min] | Area    | Area% | Height | Height% | Width[sec] | INTEG |
|-----|---------|---------|-------|--------|---------|------------|-------|
| 1   | 54.66   | 181.96  | 2.02  | 14.44  | 1.63    | 11.83      | BB    |
| 2   | 56.28   | 8829.38 | 97.98 | 871.36 | 98.37   | 9.51       | BB    |

[ TIC ]

Data : Dr-Cabrera-Armando-878

Date : 28-Nov-107 11:49

Sample: 2389 G Reacc 323 AX505HA

Note :

Inlet : GC

Ion Mode : EI+

Ion Species : Normal Ion [MF-Linear]

TIC Range : m/z 5 to 650

Output RT Range : 0.00 to 69.99 min

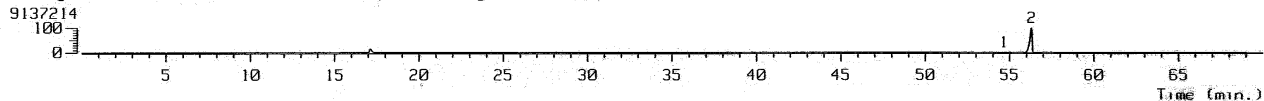

[ Mass Spectrum ]

RT : 54.66 min

Scan# : 4100-4085-4121

Temp : 0.0 deg.C

Ion Mode : EI+

Int. : 3.94

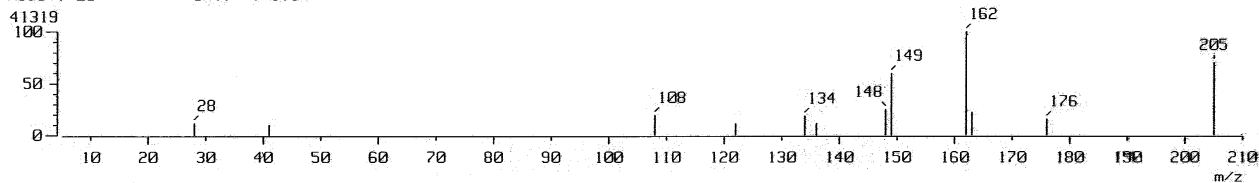

[ Mass Spectrum ]

RT : 56.28 min

Scan# : 4222-4188-4266

Temp : 0.0 deg.C

Ion Mode : EI+

Int. : 177.10

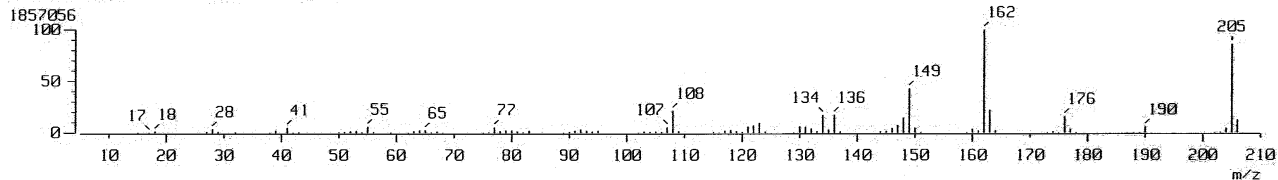

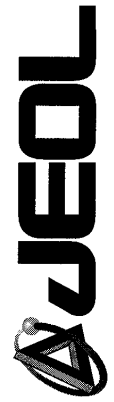

```

Reacc321-sf9-1H-4.jdf
= Cabrea
= single_pulse.exp
= Laura
= CHLOROFORM-D
= 8-AUG-2008 08:02:11
= 20-OCT-2008 16:16:52
= 20-OCT-2008 16:17:56
= Single Pulse Experiment
= 1D COMPLEX
= 16384
= 1H
= [ppm]
= X
= Eclipse+ 300
= DELTA_NMR
Field_strength = 7.0586013[T] (300[MHz]
X_acq_duration = 3.6339712[s]
X_domain = 1H
X_freq = 300.52965592[MHz]
X_offset = 5[ppm]
X_points = 16384
X_prescans = 0
X_resolution = 0.27518105[Hz]
X_sweep = 4.50856628[MHz]
Clipped = FALSE
Mod_return = 1
Scans = 32
Total_scans = 32
X_90_width = 9.5[us]
X_acq_time = 3.6339712[s]
X_angle = 45[deg]
X_pulse = 4.75[us]
X_pulse_wait = 3[us]
X_pulse_offset = 3[us]
X_pulse_phase = 171
Relaxation_delay = 1[s]
Temp_get = 19.5[dc]
Dabblank_time = 2[us]
  
```

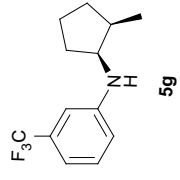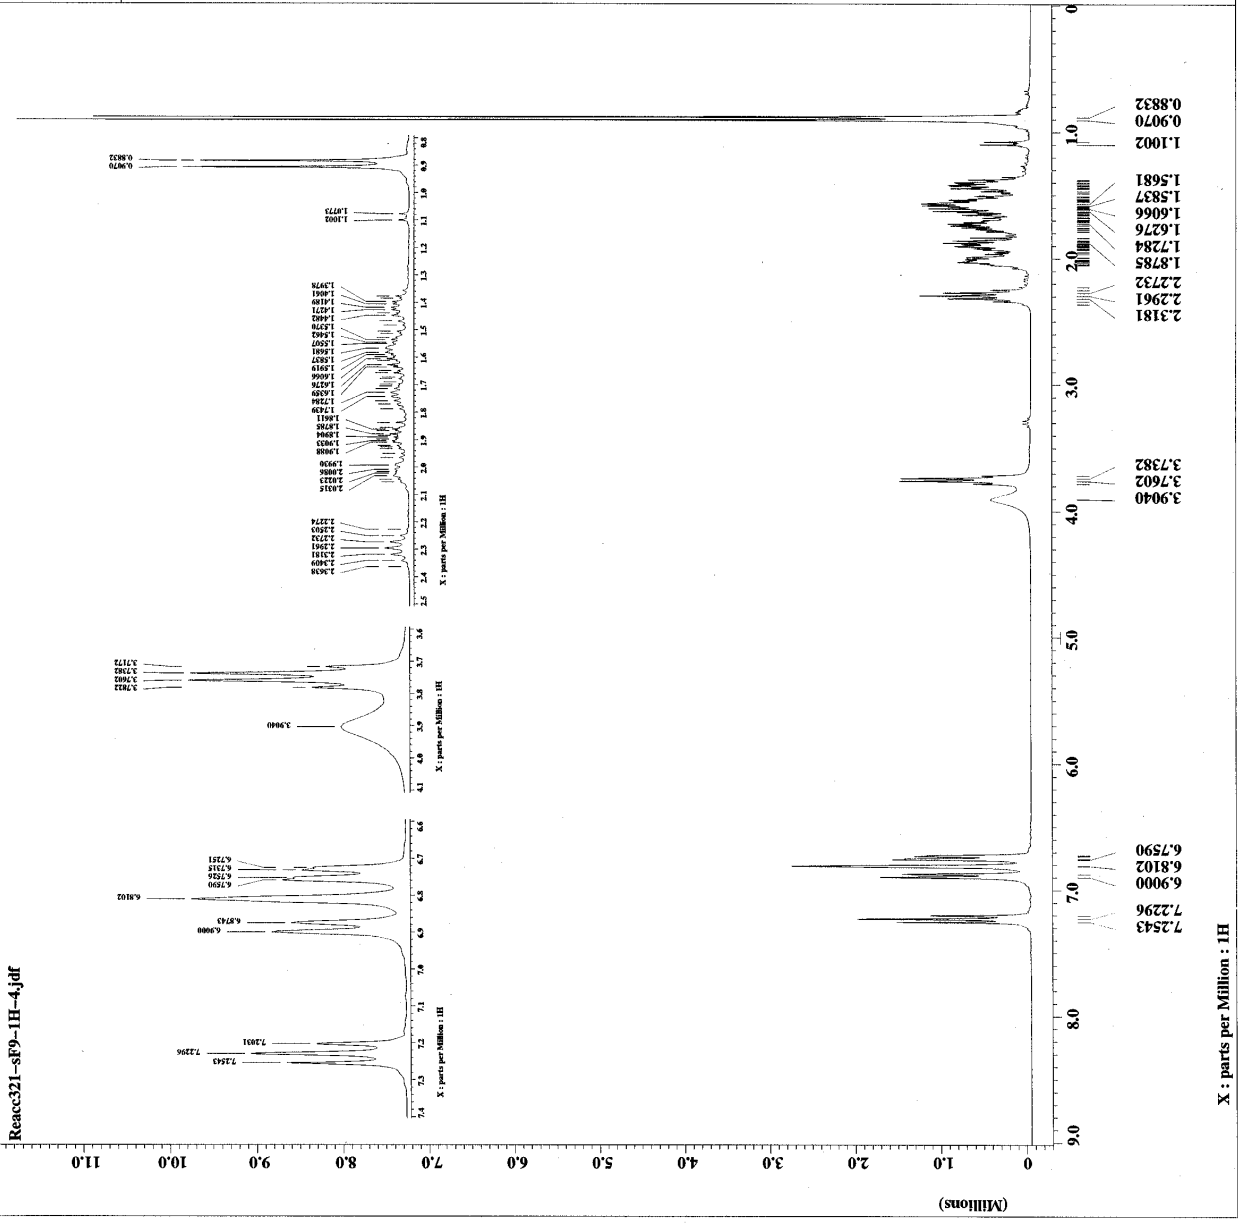

Reacc321-sf9-1H-4.jdf

X: parts per Million : 1H

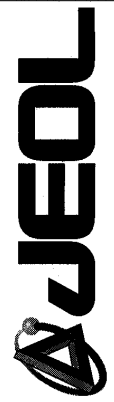

Reacc321-sf9-13C-3.jdf

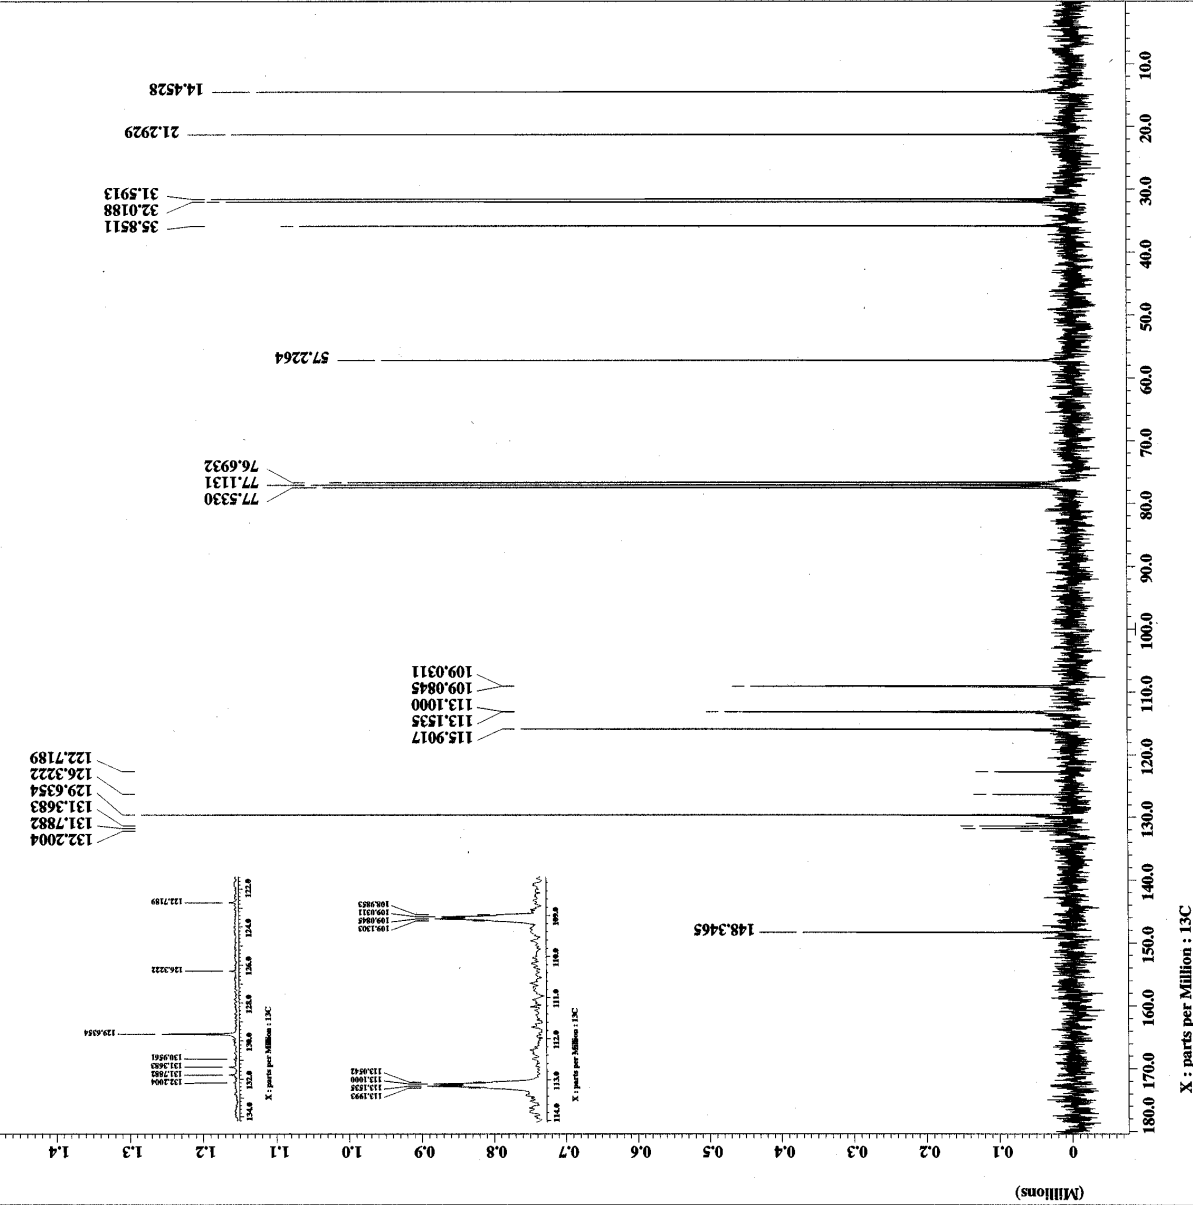

```

Filename = Reacc321-sf9-13C-3.jdf
Author = Cabrera
Experiment = single_pulse_dec
Sample_id = Laura
Solvent = CHLOROFORM-D
Creation_time = 8-AUG-2008 08:13:29
Revision_time = 20-OCT-2008 16:25:04
Current_time = 20-OCT-2008 16:25:52
Comment = Single Pulse with Bro
Data_format = AD_COMPLEX
Dir_size = 32768
Dir_title = 13C
Dir_units = [ppm]
Dir_extensions = Eclipse+ 300
Spectrometer = DELTA_NMR
Field_strength = 7.0586013[T] (300[MHZ]
X_acq_duration = 1.7334272[s]
X_domain = 13C
X_freq = 75.56823426[MHZ]
X_offset = 100[Dppm]
X_points = 32768
X_prescans = 4
X_resolution = 0.57689184[MHZ]
X_sweep = 18.90359168[MHZ]
Irr_domain = IR
Irr_freq = 300.52965592[MHZ]
Irr_offset = 5[Dppm]
Clipped = FALSE
Mod_return = 201
Total_scans = 221
X_90_width = 11.3[us]
X_acq_time = 1.7334272[s]
X_ang1 = 30[deg]
X_pulse = 3.76666667[us]
Initial_wait = 1[s]
Phase_preset = 3[us]
Recvr_gain = 30
Relaxation_delay = 1[s]
Temp_get = 21.3[degC]
Unblank_time = 2[us]
  
```

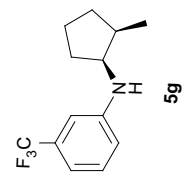

[ TIC ]

Data : Dr-Cabrera-Armando-505  
Sample: 857 G Rx-321-s AX505HA  
Note :  
Inlet : GC  
Ion Species : Normal Ion

Date : 26-Mar-120 10:16  
Ion Mode : EI+  
TIC Range : m/z 5 to 650

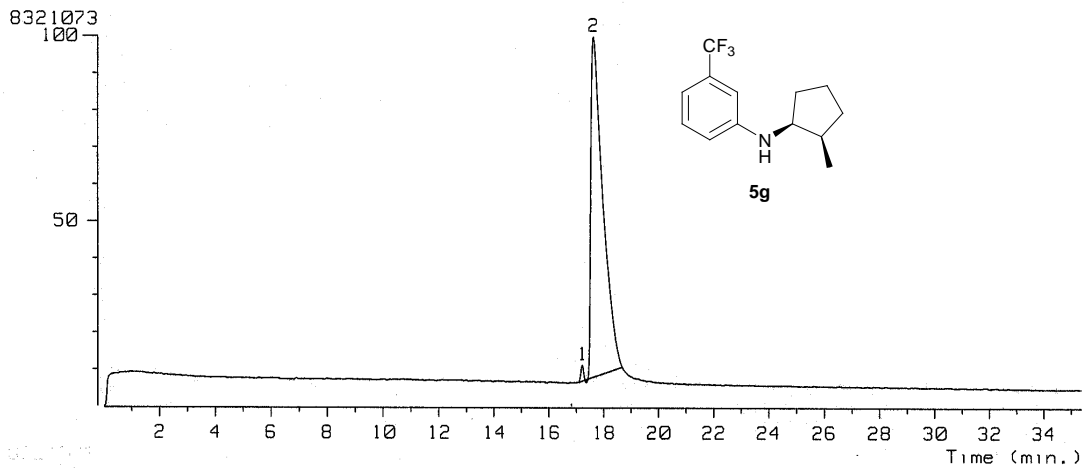

| No. | RT [min] | Area     | Area% | Height | Height% | Width [sec] | INTEG |
|-----|----------|----------|-------|--------|---------|-------------|-------|
| 1   | 17.22    | 211.29   | 0.95  | 33.69  | 4.41    | 5.89        | BV    |
| 2   | 17.64    | 22132.42 | 99.05 | 729.55 | 95.59   | 28.49       | VB    |

[ TIC ]

Data : Dr-Cabrera-Armando-505  
Sample: 857 G Rx-321-s AX505HA  
Note :  
Inlet : GC  
Ion Species : Normal Ion [MF-Linear]  
TIC Range : m/z 5 to 650

Date : 26-Mar-120 10:16

Ion Mode : EI+

Output RT Range : 0.00 to 35.38 min

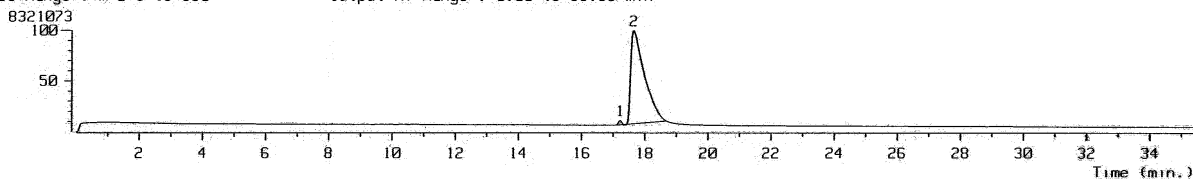

[ Mass Spectrum ]

RT : 17.22 min  
Ion Mode : EI+

Scan# : 1292-1283-1402  
Int. : 7.45

Temp : 0.0 deg.C

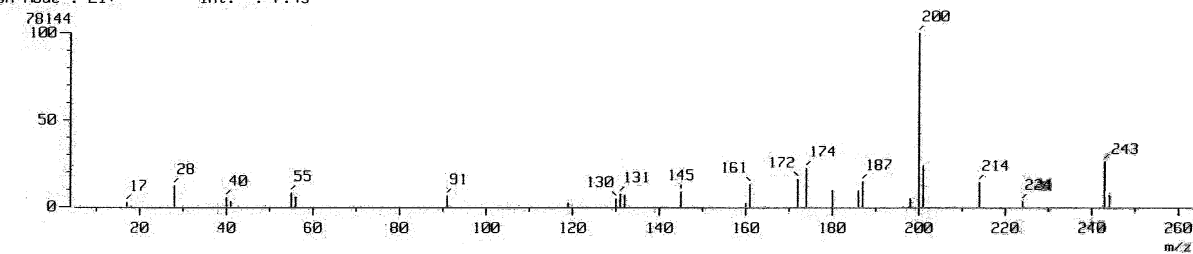

[ Mass Spectrum ]

RT : 17.64 min  
Ion Mode : EI+

Scan# : 1324-1283-1402  
Int. : 203.84

Temp : 0.0 deg.C

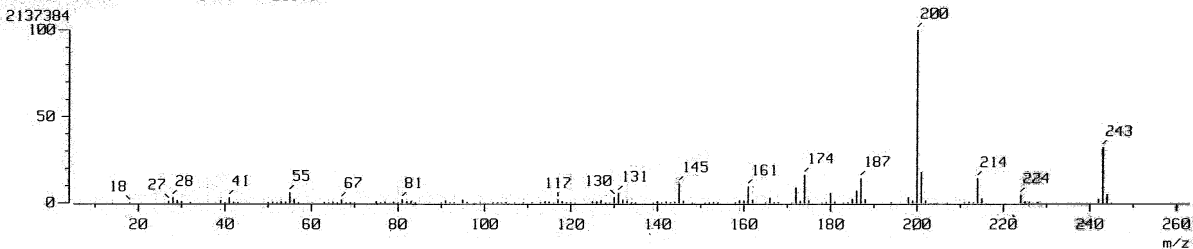

INSTITUTO DE QUIMICA, UNAM/EHS

Dr. A. Cabrera/Laura P. P.

Clave. Reacc514

Disolvente: CDCl<sub>3</sub>

Hidrogeno-1

Eclipse 300 MHz Teol (E)

16-01-09

No. de registro: 0088

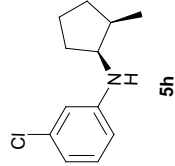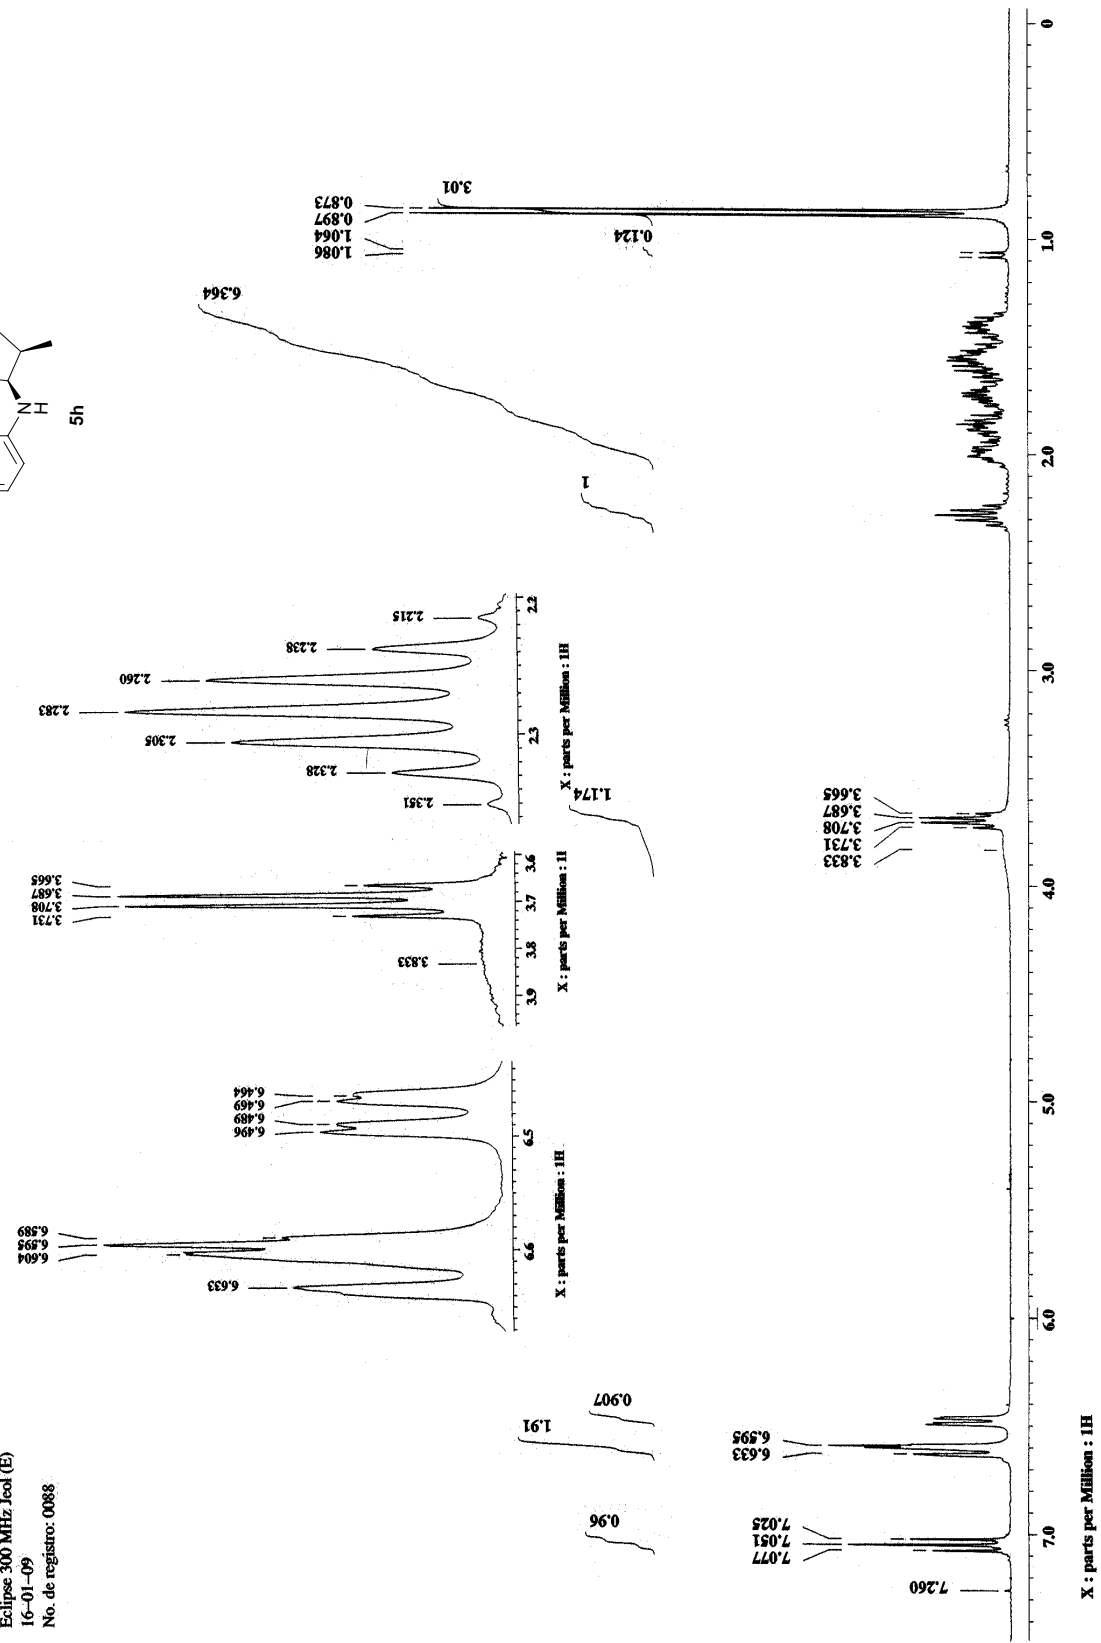

INSTITUTO DE QUIMICA, UNAM/EHS

Dr. A. Cabrera/Laura R. P.

Clave: Reacc514-2

Disolvente: CDCl<sub>3</sub>

Carbono-13

Eclipse 300 MHz Jeol (E)

26-01-09

No. de registro: 0261

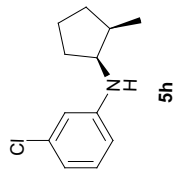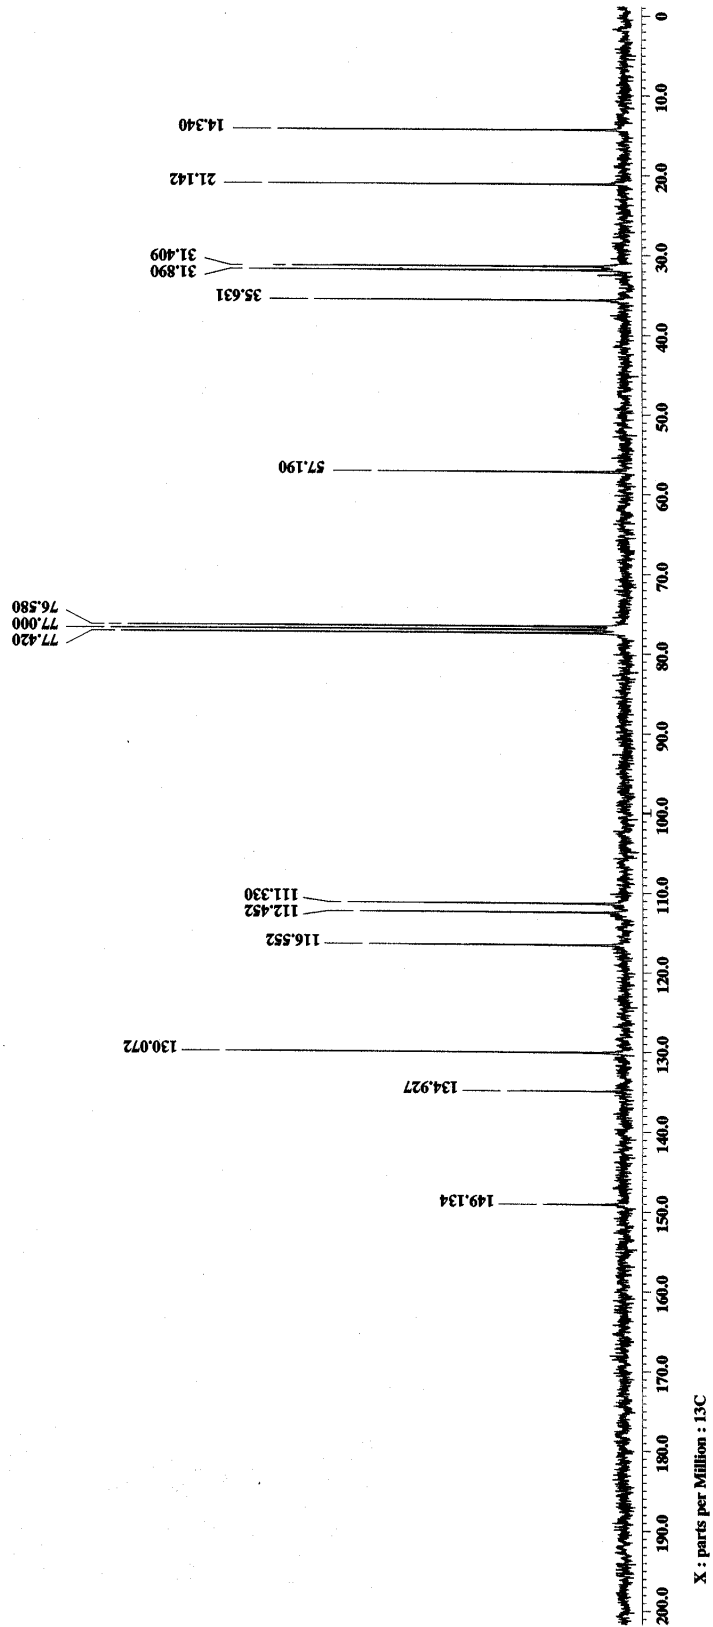

[ TIC ]

Data : Dr-Cabrera-Armando-922  
Sample: 57 G reacc 514 AX505HA  
Note :  
Inlet : GC  
Ion Species : Normal Ion

Date : 14-Jan-120 12:05  
Ion Mode : EI+  
TIC Range : m/z 5 to 650

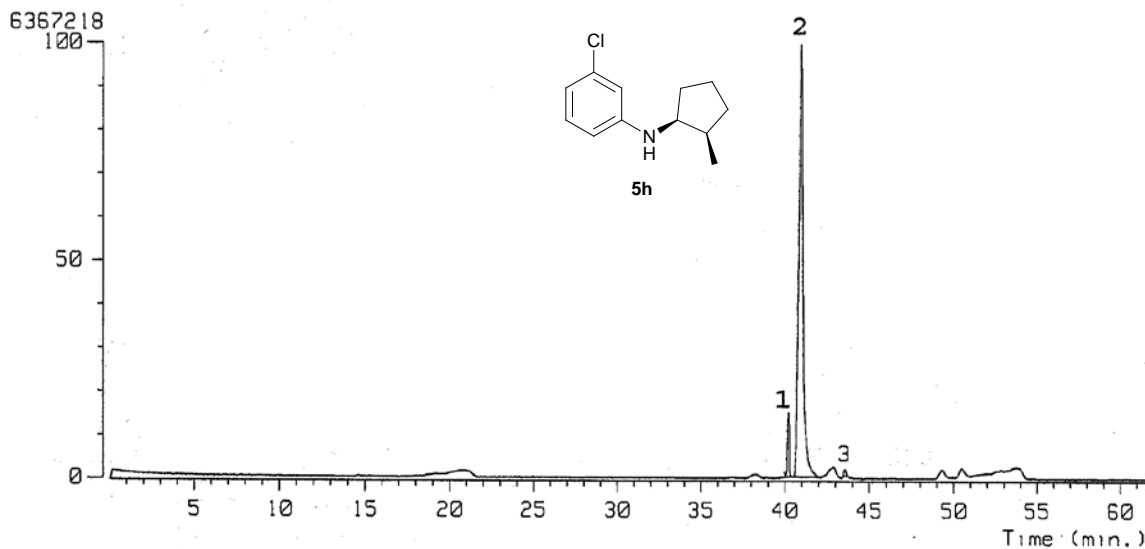

| No. | RT [min] | Area     | Area% | Height | Height% | Width [sec] | INTEG |
|-----|----------|----------|-------|--------|---------|-------------|-------|
| 1   | 40.17    | 474.94   | 4.23  | 55.11  | 8.27    | 16.16       | VB    |
| 2   | 41.00    | 10678.02 | 95.09 | 602.60 | 90.43   | 16.64       | BB    |
| 3   | 43.55    | 6.68     | 0.68  | 8.67   | 1.30    | 8.30        | BB    |

[ TIC ]

Data : Dr-Cabrera-Armando-922  
Sample: 57 G reacc 514 AX505HA  
Note :  
Inlet : GC  
Ion Species : Normal Ion [MF-Linear]  
TIC Range : m/z 5 to 650

Date : 14-Jan-120 12:05

Ion Mode : EI+

Output RT Range : 0.00 to 61.56 min

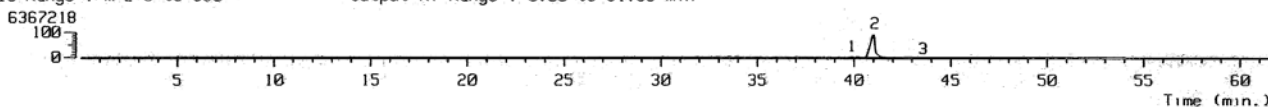

[ Mass Spectrum ]

RT : 40.17 min  
Scan# : 3010-2977-3024  
Ion Mode : EI+  
Int. : 7.24  
Temp : 0.0 deg.C

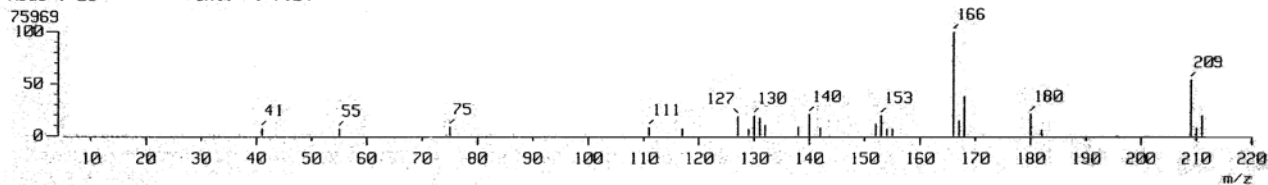

[ Mass Spectrum ]

RT : 41.00 min  
Scan# : 3072-3035-3154  
Ion Mode : EI+  
Int. : 122.46  
Temp : 0.0 deg.C

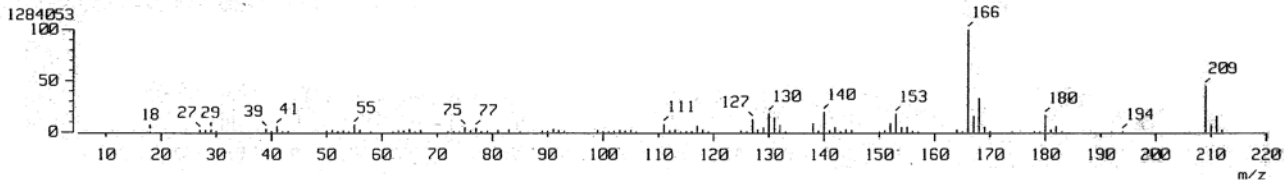

U.N.A.M. Instituto de Química ICH  
 Dr. A. Cabrera/Laura R. P  
 Clave: Reacc512-(S)BIN  
 Disolvente: CDCl3  
 Experimento 1E  
 Varian Unity 300 MHz (D)  
 No. de Registro 0142  
 21-01-09

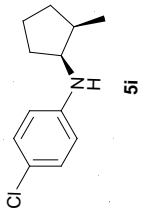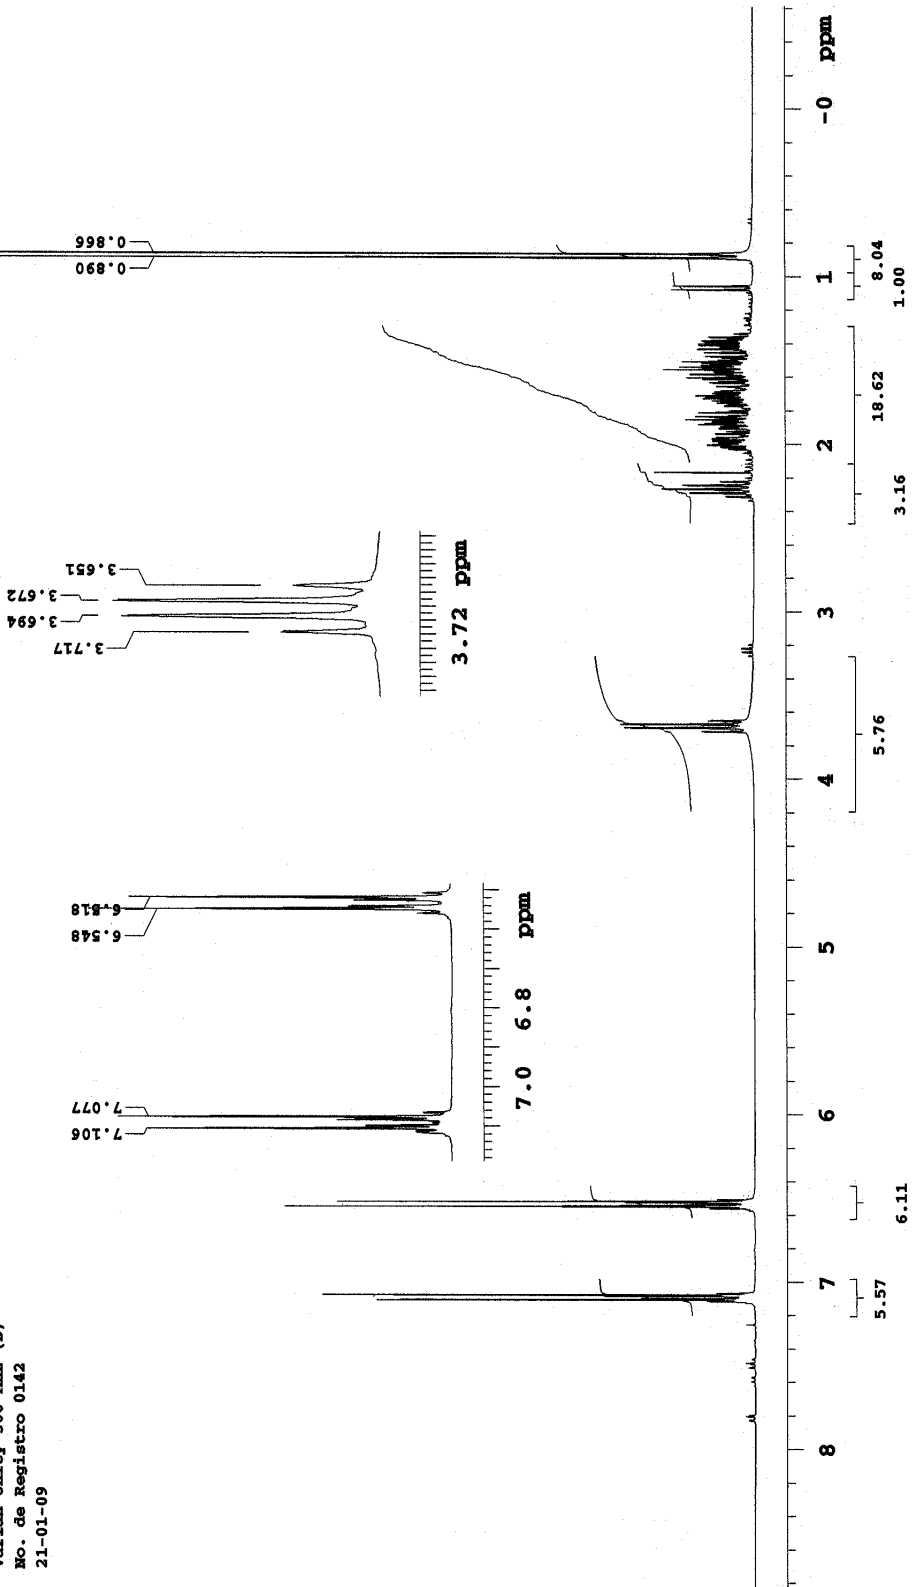



U.N.A.M. Instituto de Química ICH  
Dr. A. Cabrera/Laura R. P  
Clave: Reacc512-(S)BIN  
Disolvente: CDCl<sub>3</sub>  
Experimento 13C  
Varian Unity 75 MHz (D)  
No. de Registro 0142  
21-01-09

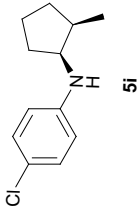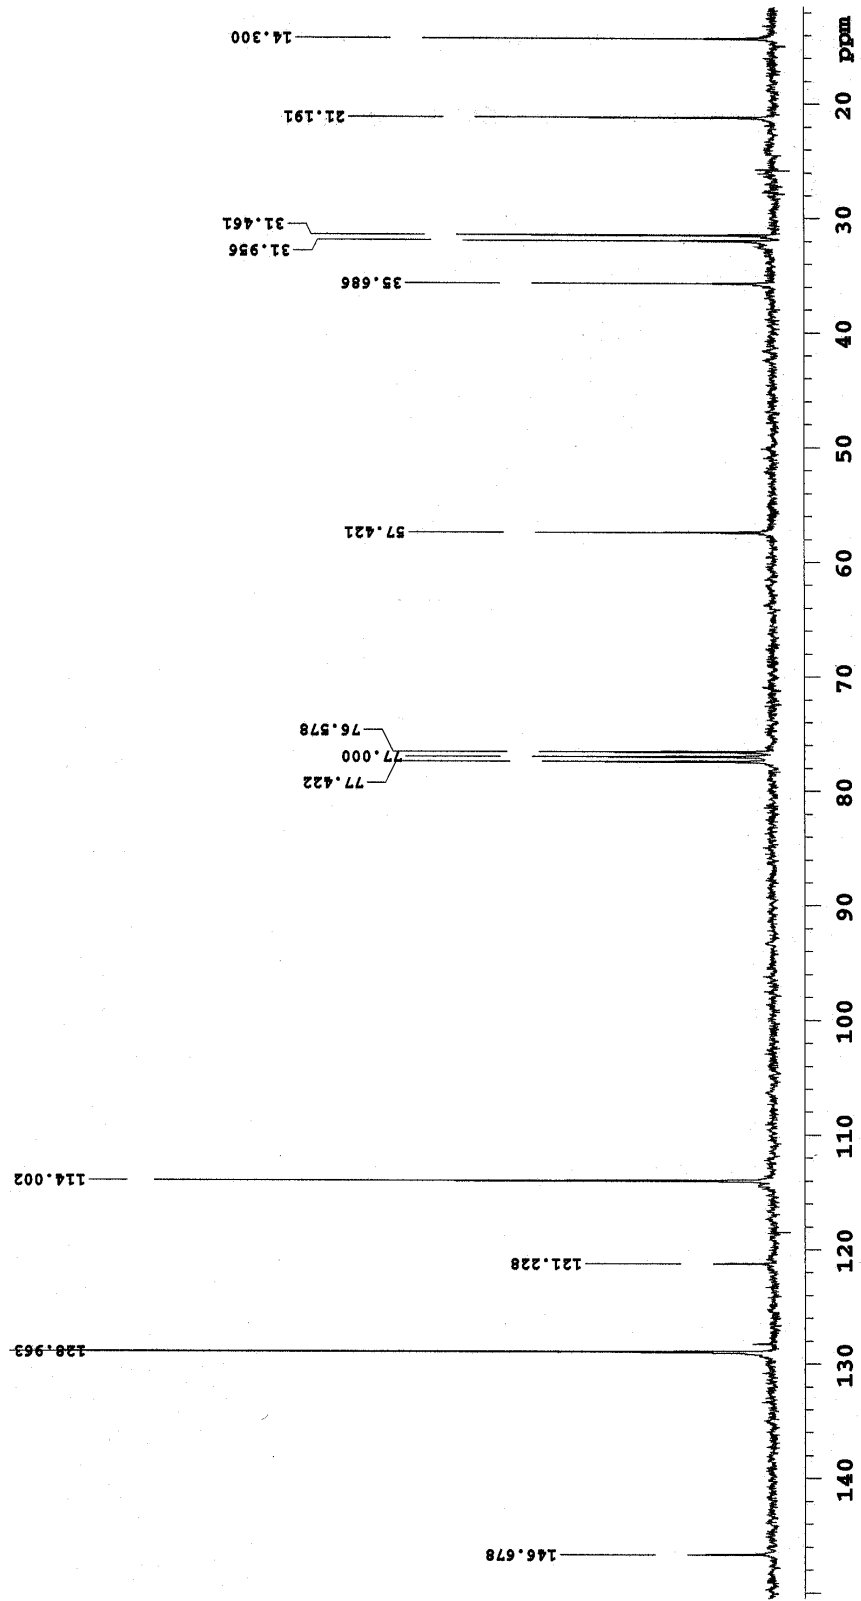

[ TIC ]

Data : Dr-Cabrera-Armando-918  
Sample: 32 G Reacc 512 AX505HA  
Note :  
Inlet : GC  
Ion Species : Normal Ion

Date : 12-Jan-108 13:12  
Ion Mode : EI+  
TIC Range : m/z 5 to 650

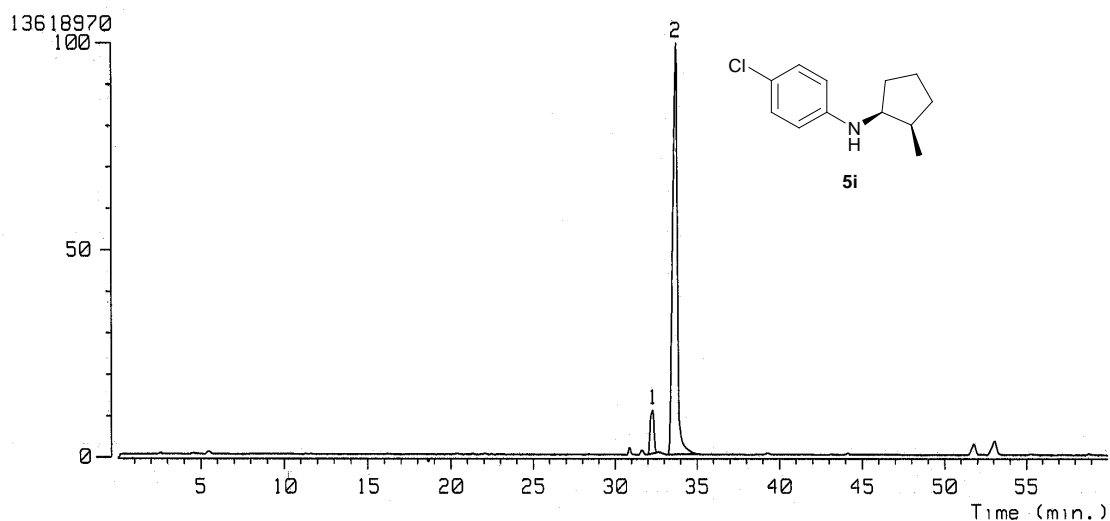

| No. | RT [min] | Area     | Area% | Height  | Height% | Width [sec] | INTEG |
|-----|----------|----------|-------|---------|---------|-------------|-------|
| 1   | 32.30    | 2149.23  | 7.73  | 134.85  | 9.47    | 14.97       | BB    |
| 2   | 33.79    | 25647.76 | 92.27 | 1288.72 | 90.53   | 18.69       | BB    |

[ TIC ]

Data : Dr-Cabrera-Armando-918  
Sample: 32 G Reacc 512 AX505HA  
Note :  
Inlet : GC  
Ion Species : Normal Ion [MF-Linear]

Date : 12-Jan-108 13:12

Ion Mode : EI+

TIC Range : m/z 5 to 650  
Output RT Range : 0.00 to 60.00 min

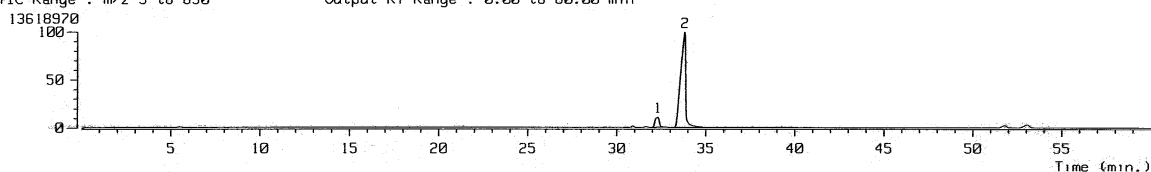

[ Mass Spectrum ]

RT : 32.30 min  
Scan# : 2420-2396-2439  
Ion Mode : EI+  
Int. : 25.34

Temp : 0.0 deg.C

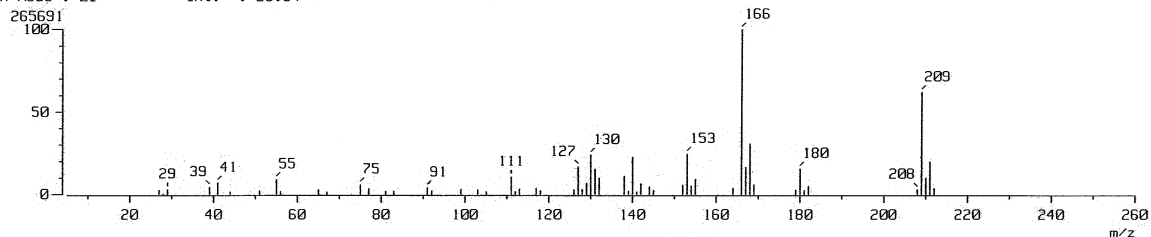

[ Mass Spectrum ]

RT : 33.79 min  
Scan# : 2532-2481-2625  
Ion Mode : EI+  
Int. : 228.58

Temp : 0.0 deg.C

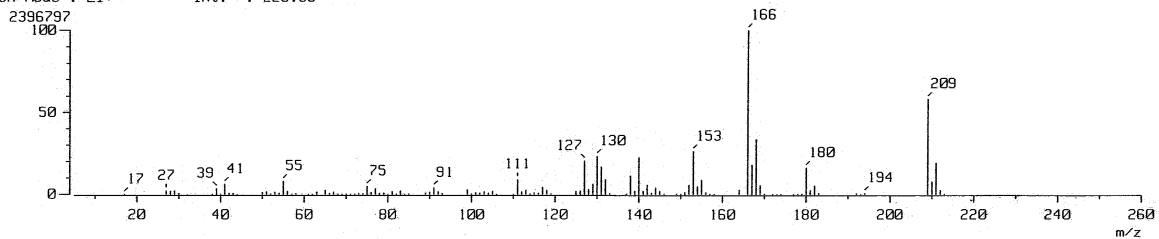

U.N.A.M. Instituto de Química ICQ  
 Dr. A. Cabrera/Laura R. P  
 Clave:Reacc515F1516  
 Disolvente:CDCl3  
 Experimento 1H  
 Varian Unity 300 MHz (D)  
 No. de Registro 0175  
 20-01-09

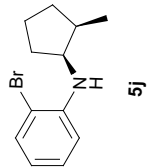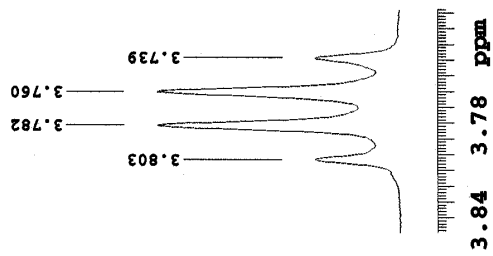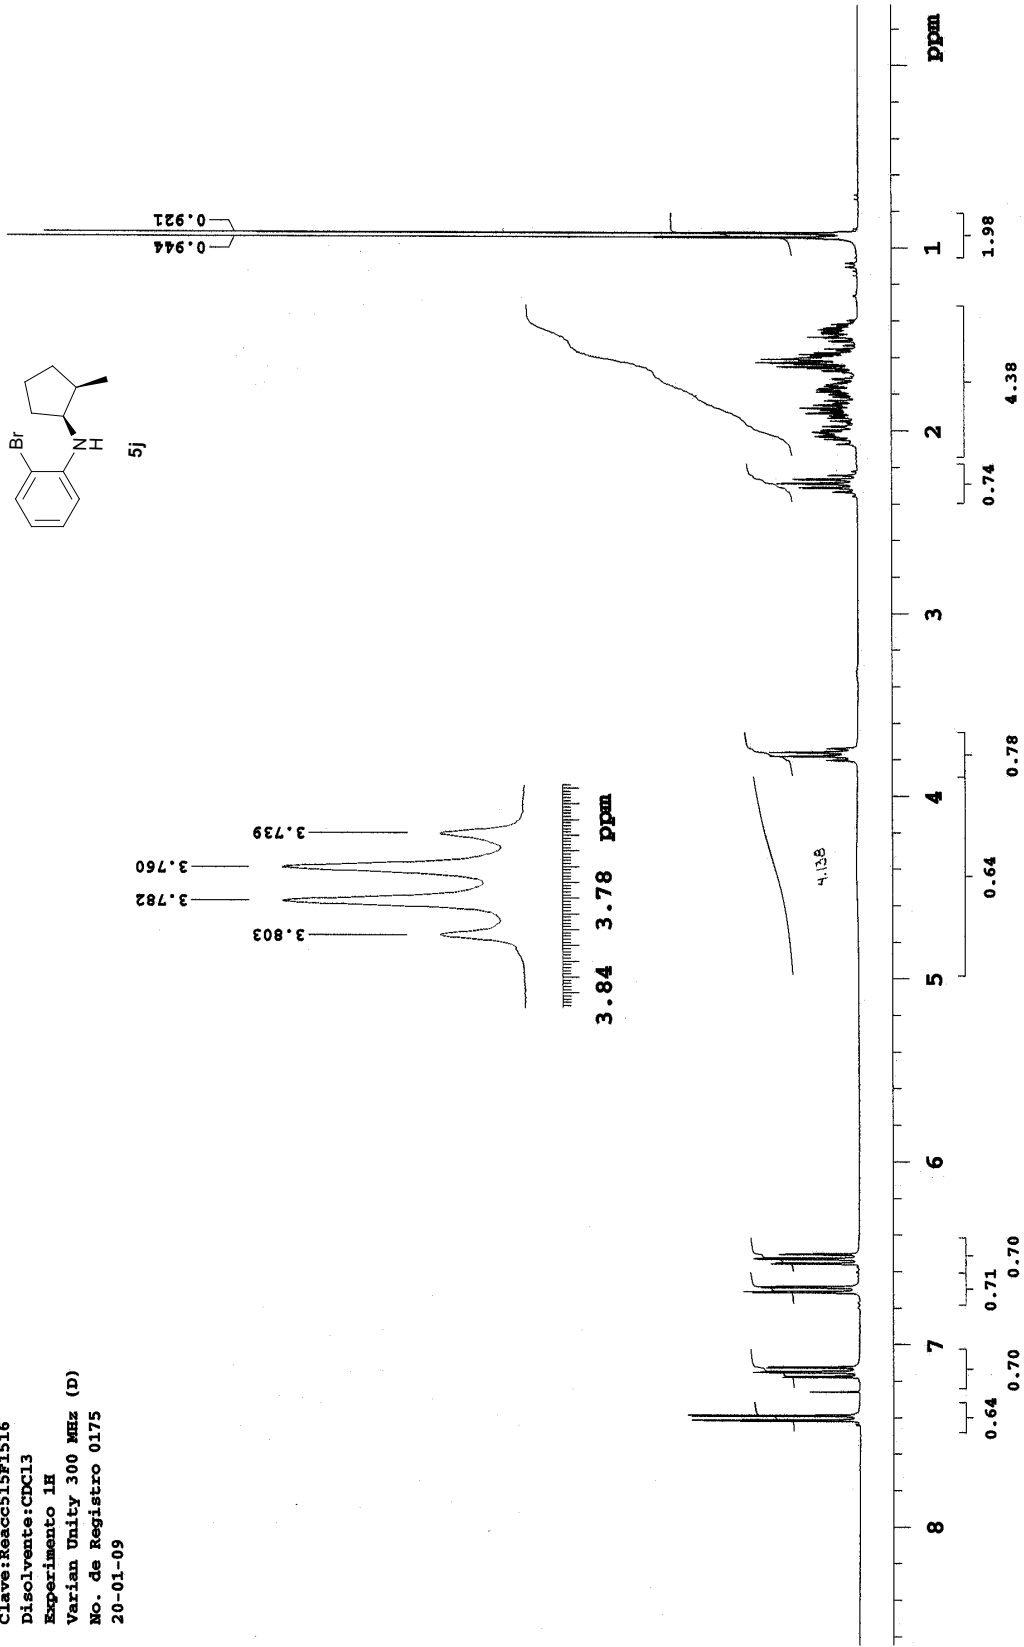

U.N.A.M. Instituto de Química ICH  
Dr. A. Cabrera/Laura R. P  
Clave:Reacc515F1516  
Disolvente:CDCl3  
Experimento 13C  
Varian Unity 75 MHz (D)  
No. de Registro 0175  
20-01-09

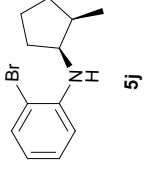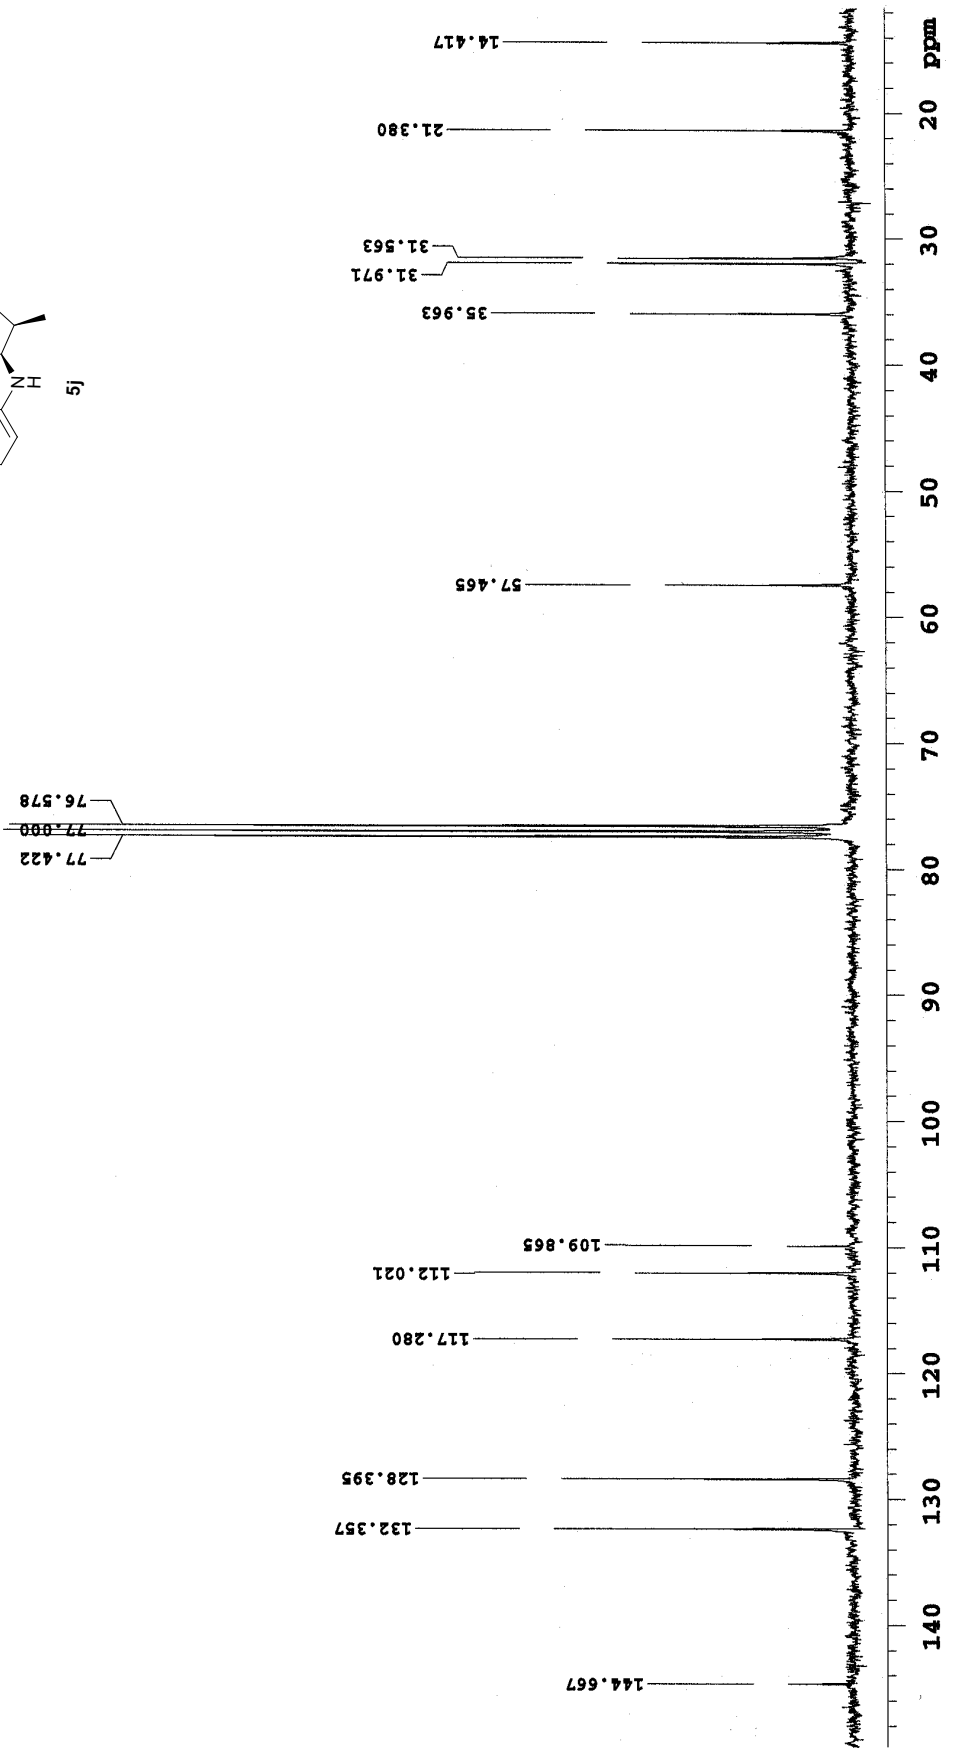

[ TIC ]

Data : Dr-Cabrera-Armando-924

Date : 15-Jan-120 14:48

Sample: 88 G reacc 515 AX505HA

Note :

Inlet : GC

Ion Mode : EI+

Ion Species : Normal Ion

TIC Range : m/z 5 to 650

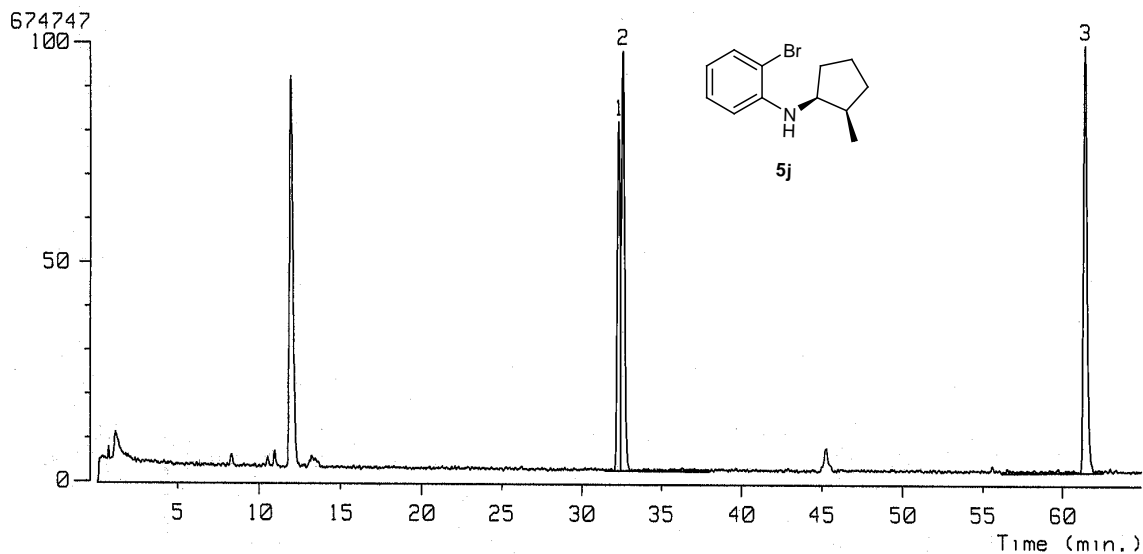

| No. | RT[min] | Area    | Area% | Height | Height% | Width[sec] | INTEG |
|-----|---------|---------|-------|--------|---------|------------|-------|
| 1   | 32.32   | 631.92  | 24.50 | 51.16  | 29.19   | 11.60      | BV    |
| 2   | 32.59   | 902.94  | 35.01 | 61.51  | 35.09   | 13.78      | VB    |
| 3   | 61.44   | 1044.29 | 40.49 | 62.61  | 35.72   | 15.66      | BB    |

[ TIC ]

Data : Dr-Cabrera-Armando-924

Date : 15-Jan-120 14:48

Sample: 88 G reacc 515 AX505HA

Note :

Inlet : GC

Ion Mode : EI+

Ion Species : Normal Ion [MF-Linear]

TIC Range : m/z 5 to 650

Output RT Range : 0.00 to 64.99 min

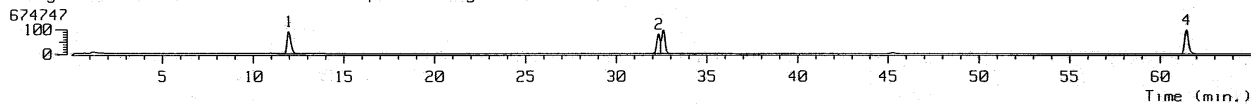

[ Mass Spectrum ]

RT : 32.32 min

Scan# : 2422-2356-2046

Temp : 0.0 deg.C

Ion Mode : EI+

Int. : 7.14

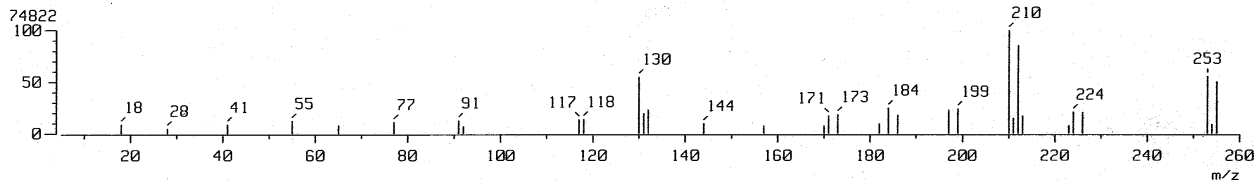

[ Mass Spectrum ]

RT : 32.59 min

Scan# : 2442-2356-2046

Temp : 0.0 deg.C

Ion Mode : EI+

Int. : 7.86

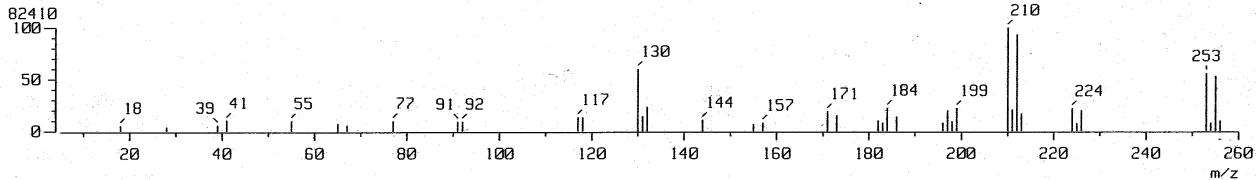

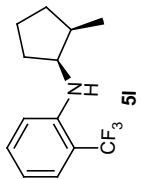

U.N.A.M. Instituto de Química ICH  
 Dr. A. Cabrera/Laura R.P  
 Clave:Reacc511-2  
 Disolvente:CDCl3  
 Experimento 1H  
 Varian Unity 300 MHz (D)  
 No. de Registro 0141

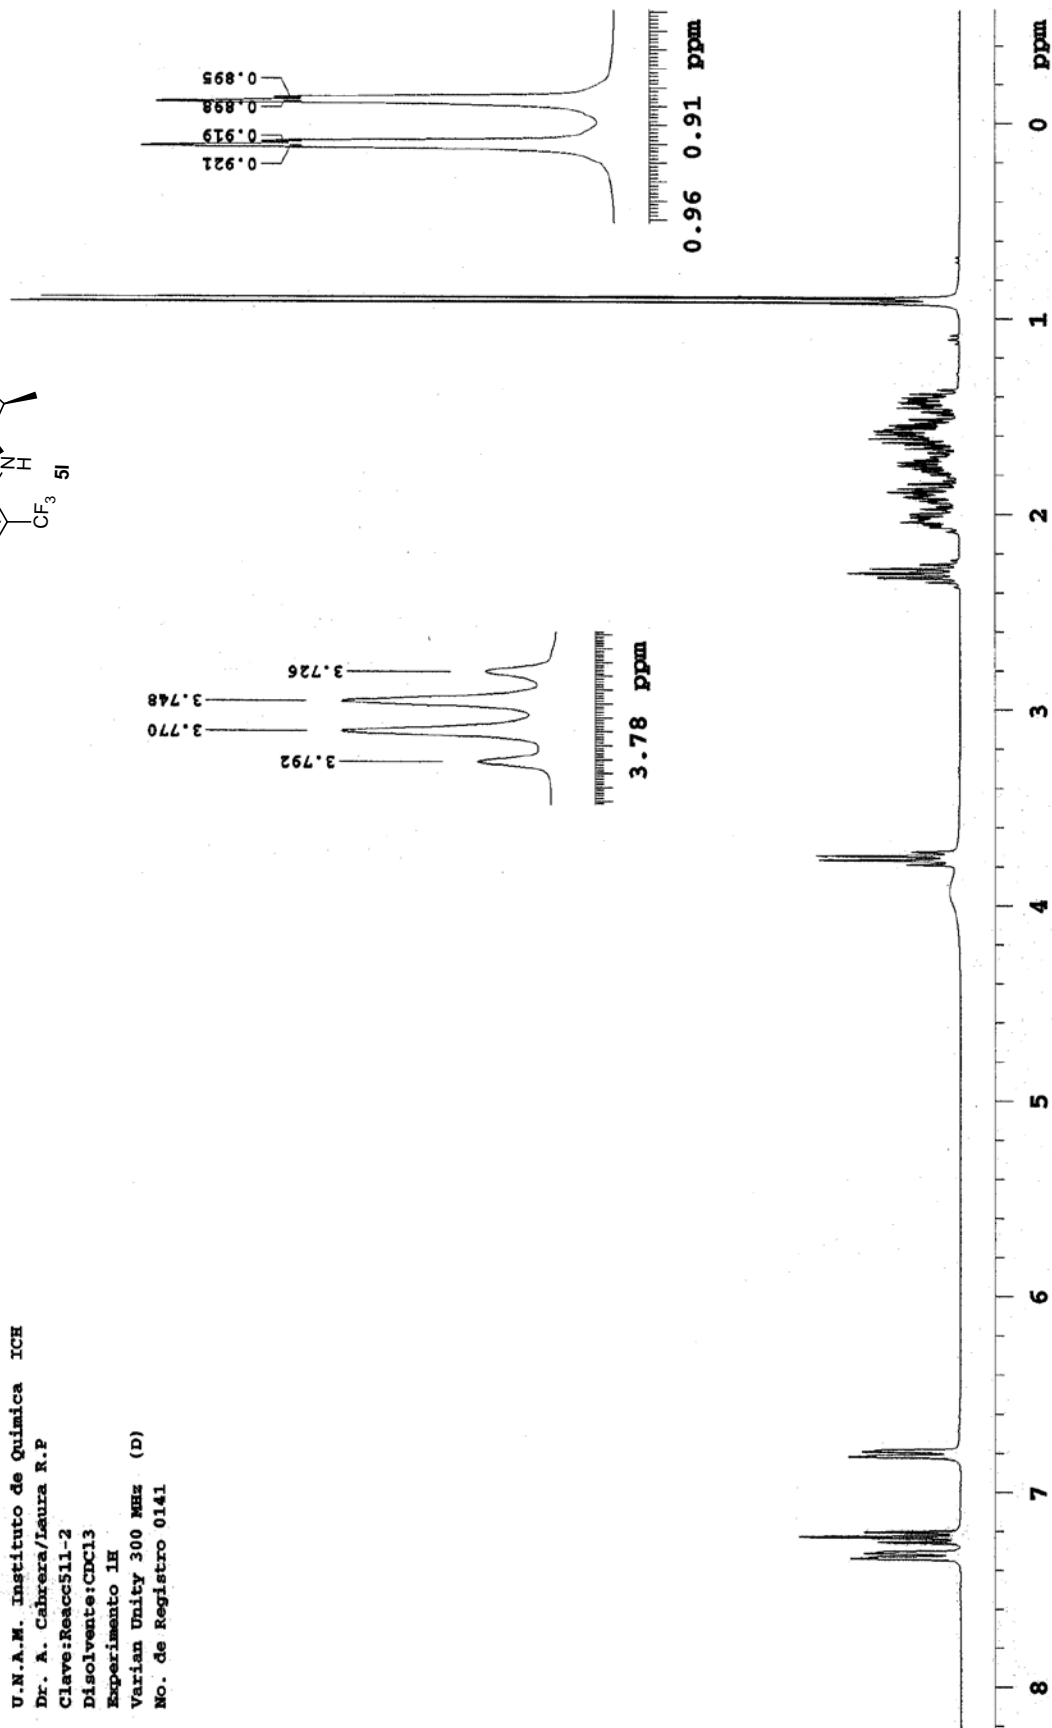

[ TIC ]

Data : Dr-Cabrera-Armando-916

Date : 09-Jan-108 07:58

Sample: 31 G Reacc 511 AX505HA

Note :

Inlet : GC

Ion Mode : EI+

Ion Species : Normal Ion

TIC Range : m/z 5 to 650

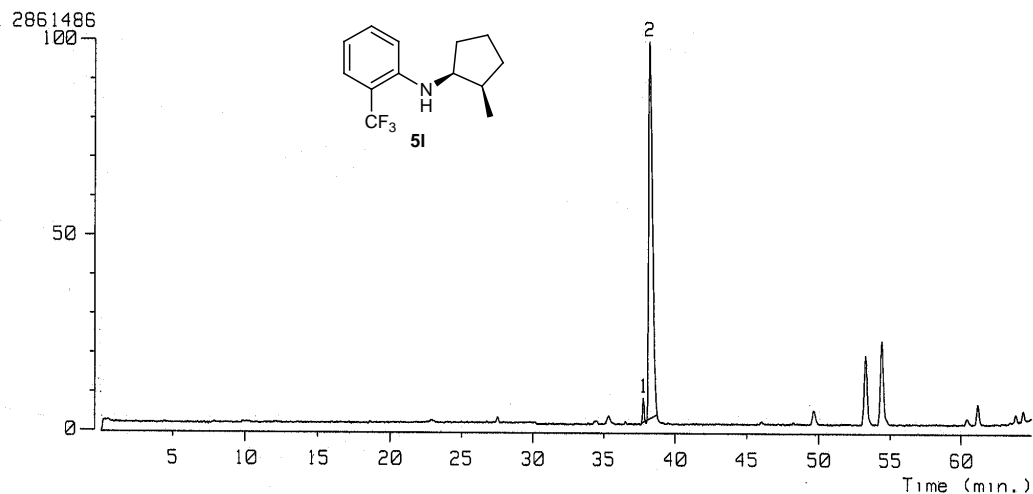

| No. | RT[min] | Area    | Area% | Height | Height% | Width[sec] | INTEG |
|-----|---------|---------|-------|--------|---------|------------|-------|
| 1   | 37.77   | 112.96  | 2.27  | 16.64  | 5.94    | 6.37       | BV    |
| 2   | 38.21   | 4858.82 | 97.73 | 263.57 | 94.06   | 17.31      | VB    |

[ TIC ]

Data : Dr-Cabrera-Armando-916

Date : 09-Jan-108 07:58

Sample: 31 G Reacc 511 AX505HA

Note :

Inlet : GC

Ion Mode : EI+

Ion Species : Normal Ion [MF-Linear]

TIC Range : m/z 5 to 650

Output RT Range : 0.00 to 64.99 min

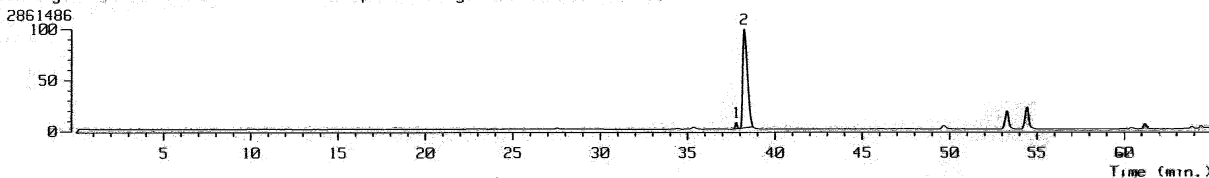

[ Mass Spectrum ]

RT : 37.77 min

Scan# : 2830-2821-2903

Temp : 0.0 deg.C

Ion Mode : EI+

Int. : 6.82

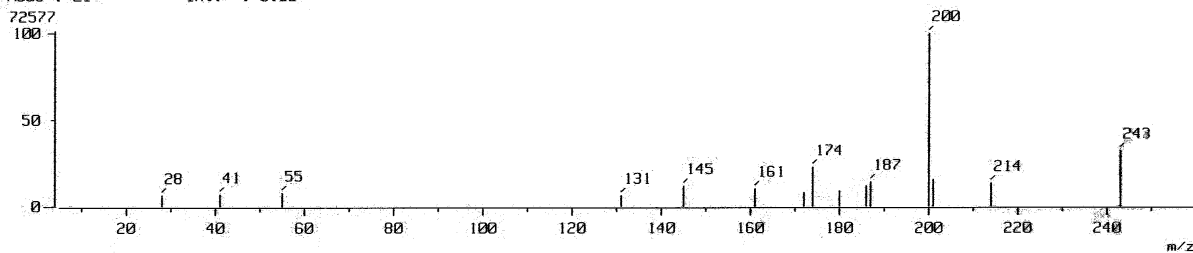

[ Mass Spectrum ]

RT : 38.21 min

Scan# : 2863-2821-2903

Temp : 0.0 deg.C

Ion Mode : EI+

Int. : 79.91

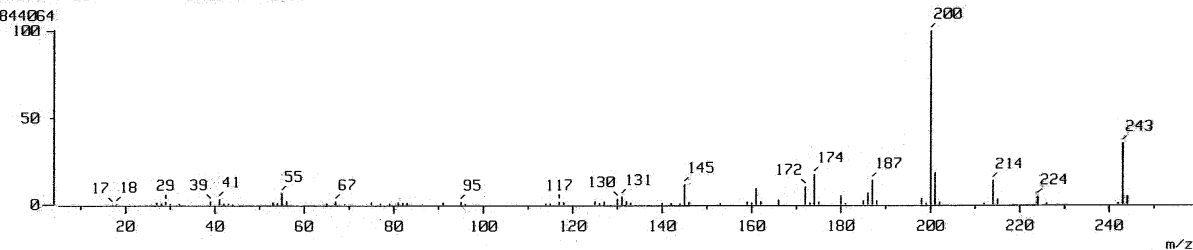

INSTITUTO DE QUIMICA, UNAM/EHS

Dr. A. Cabrera / Laura R. P.

Clave: Reacc:309

Disolvente: CDCl<sub>3</sub>

Hidrogeno-1

Eclipse 300 MHz Jeol (E)

27-01-09

Nº. de registro: 0286

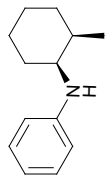

3.523  
3.512  
3.500  
3.488  
3.478

3.641

0.934

X : parts per Million : 1H

3.5 3.6 3.7

3.5 3.6 3.7

3.5 3.6 3.7

3.5 3.6 3.7

3.5 3.6 3.7

3.5 3.6 3.7

3.5 3.6 3.7

3.5 3.6 3.7

3.5 3.6 3.7

3.5 3.6 3.7

3.5 3.6 3.7

3.5 3.6 3.7

3.5 3.6 3.7

3.5 3.6 3.7

3.5 3.6 3.7

3.5 3.6 3.7

3.5 3.6 3.7

3.5 3.6 3.7

3.5 3.6 3.7

3.5 3.6 3.7

3.5 3.6 3.7

3.5 3.6 3.7



INSTITUTO DE QUIMICA, UNAM/EHS

Dr. A. Cabrera/Laura R. P.

Clave: Reacc309

Disolvente: CDCl<sub>3</sub>

Carbono-13

Eclipse 300 MHz Jeol (E)

27-01-09

No. de registro: 0286

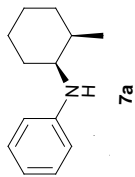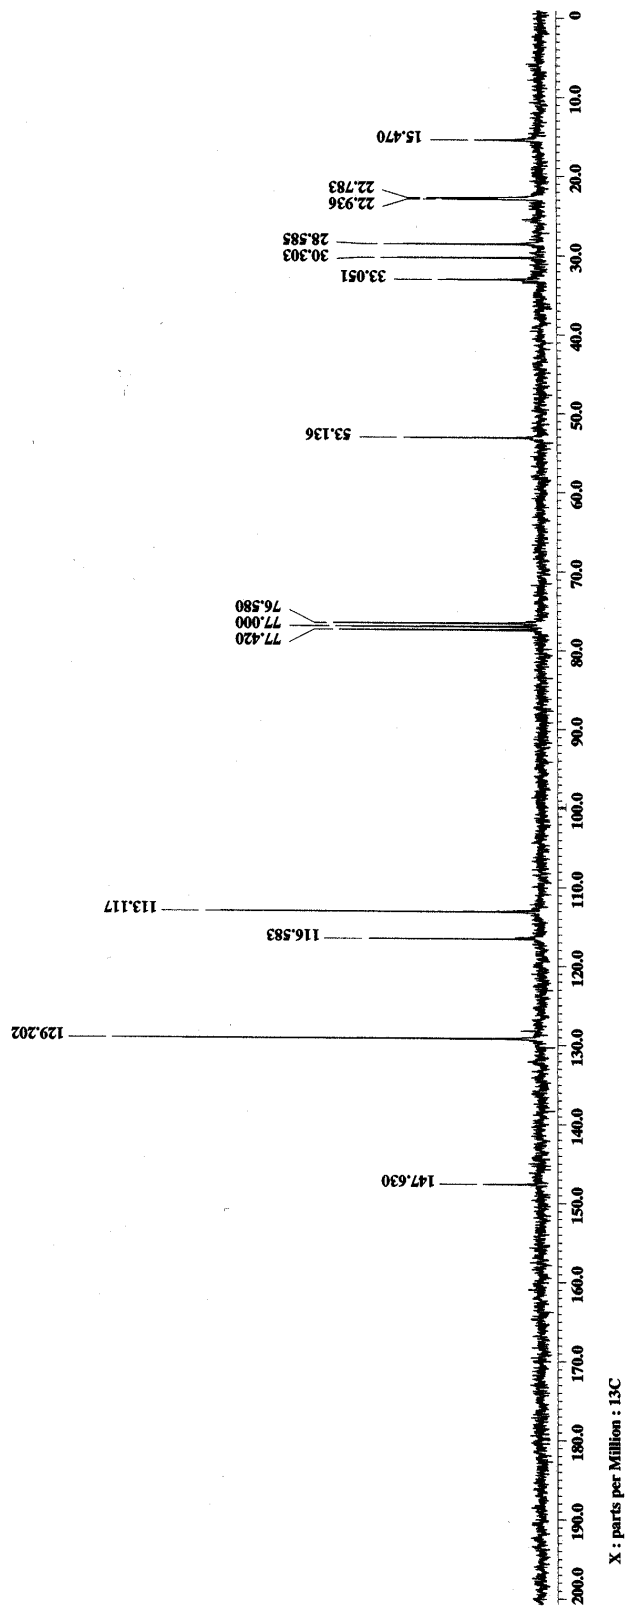

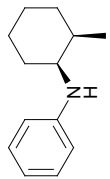

*cis*-6a  
(Table 2, entry 11)

129.201  
113.116  
116.581  
113.117

CH, CH3

33.057  
30.309  
28.591  
22.942  
22.782  
15.476

CH2

INSTITUTO DE QUIMICA, UNAM/EHS  
Dr. A. Cabrea/Laura R. P.  
Clave: Reac309  
Disolvente: CDCl3  
DEPT  
Echigo: 300 MHz, Teol (E)  
27-01-09  
No. de registre: 0286

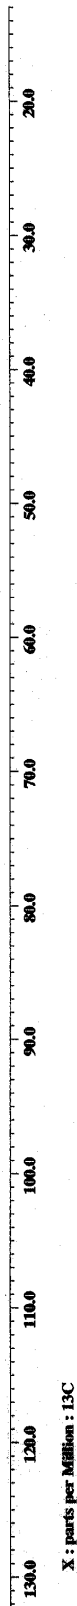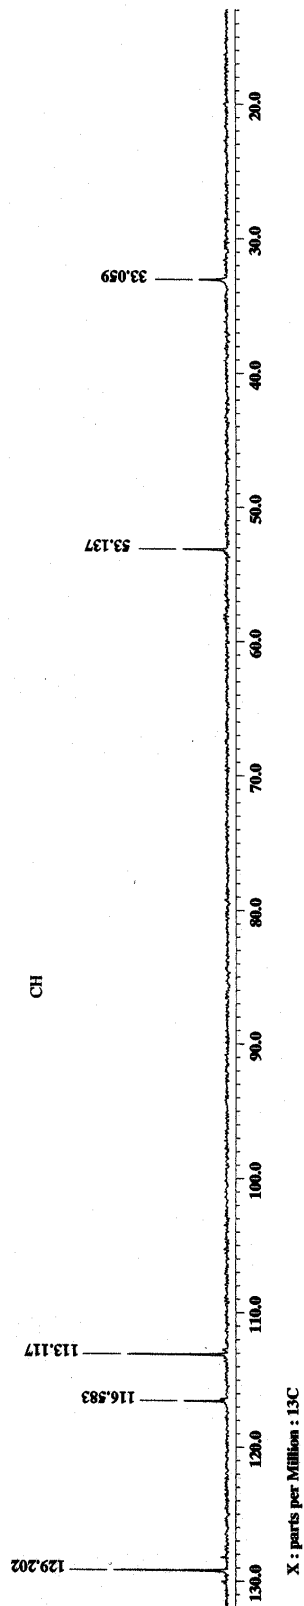

CH

[ TIC ]

Data : Dr-Dr-Cabrera-Armando-841

Date : 23-Oct-107 15:37

Sample: 2118 G reacc 309 AX505HA

Note :

Inlet : GC

Ion Mode : EI+

Ion Species : Normal Ion

TIC Range : m/z 5 to 650

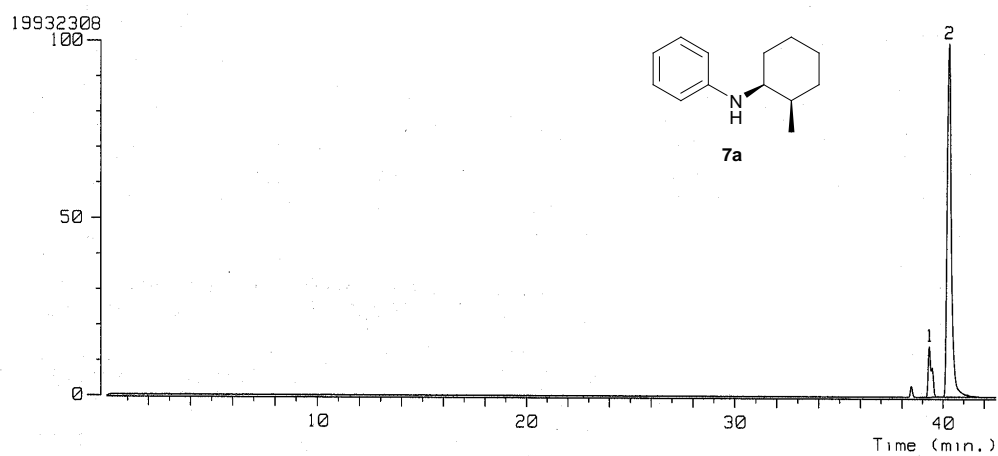

| No. | RT[min] | Area     | Area% | Height  | Height% | Width[sec] | INTEG |
|-----|---------|----------|-------|---------|---------|------------|-------|
| 1   | 39.34   | 3215.02  | 10.67 | 270.85  | 12.52   | 11.15      | BB    |
| 2   | 40.35   | 26924.89 | 89.33 | 1892.75 | 87.48   | 13.36      | BB    |

[ TIC ]

Data : Dr-Dr-Cabrera-Armando-841

Date : 23-Oct-107 15:37

Sample: 2118 G reacc 309 AX505HA

Note :

Inlet : GC

Ion Mode : EI+

Ion Species : Normal Ion [MF-Linear]

TIC Range : m/z 5 to 650

Output RT Range : 0.00 to 42.58 min

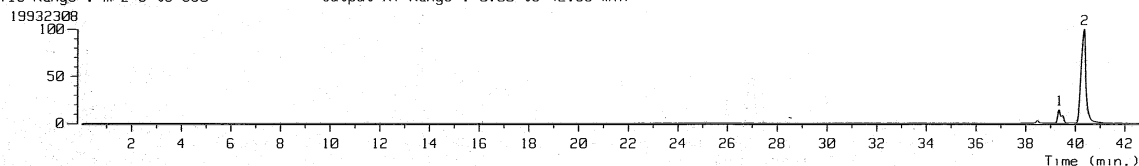

[ Mass Spectrum ]

RT : 39.34 min

Scan# : 2951-2938-2980

Temp : 0.0 deg.C

Ion Mode : EI+

Int. : 81.10

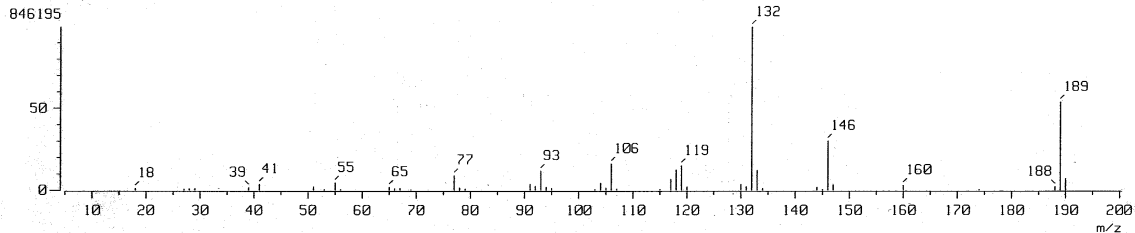

[ Mass Spectrum ]

RT : 40.35 min

Scan# : 3027-2998-3125

Temp : 0.0 deg.C

Ion Mode : EI+

Int. : 398.54

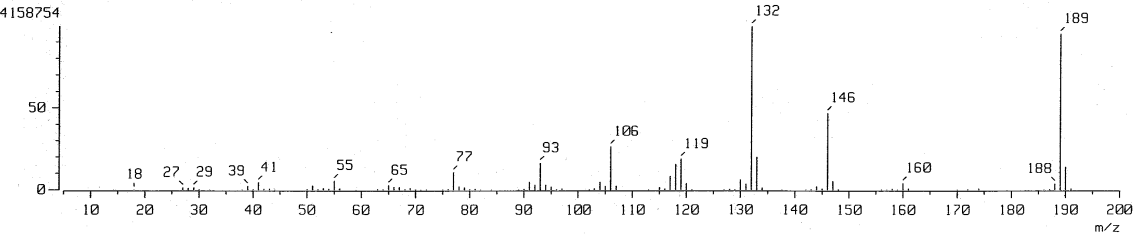

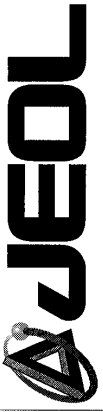

Reacc327F24-1H-4.jdf

```

Filename = Reacc327F24-1H-4.jdf
Author = Cabrera
Experiment = Single_pulse_exp
Solvent = CHLOROFORM-D
Creation_time = 14-DEC-2007 18:16:05
Revision_time = 19-DEC-2007 16:57:53
Current_time = 19-DEC-2007 16:59:30

Comment = Single Pulse Experiment
Data_format = 1D COMPLEX
Dim_size = 16384
Dim_title = 1H
Dim_units = [ppm]
Dimensions = X
Site = Eclipse+ 300
Spectrometer = DELTA_NMR

Field_strength = 7.0586013[T] (300 MHz)
X_acq_duration = 3.6339712[s]
X_domain = 1H
X_freq = 300.52965592[MHz]
X_offset = 5[ppm]
X_points = 16384
X_prescans = 0
X_resolution = 0.27518105[Hz]
X_sweep = 4.50856628[MHz]
Clipped = TRUE
Mod_return = 1
Scans = 32
Total_scans = 32

X_90_width = 9.5[us]
X_acq_time = 3.6339712[s]
X_angle = 45[deg]
X_pulse = 1.75[us]
Initial_wait = 3[s]
Phase_preset = 19
Relaxation_delay = 4[s]
Temp_get = 16.3[dc]
Unblank_time = 2[us]

```

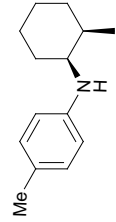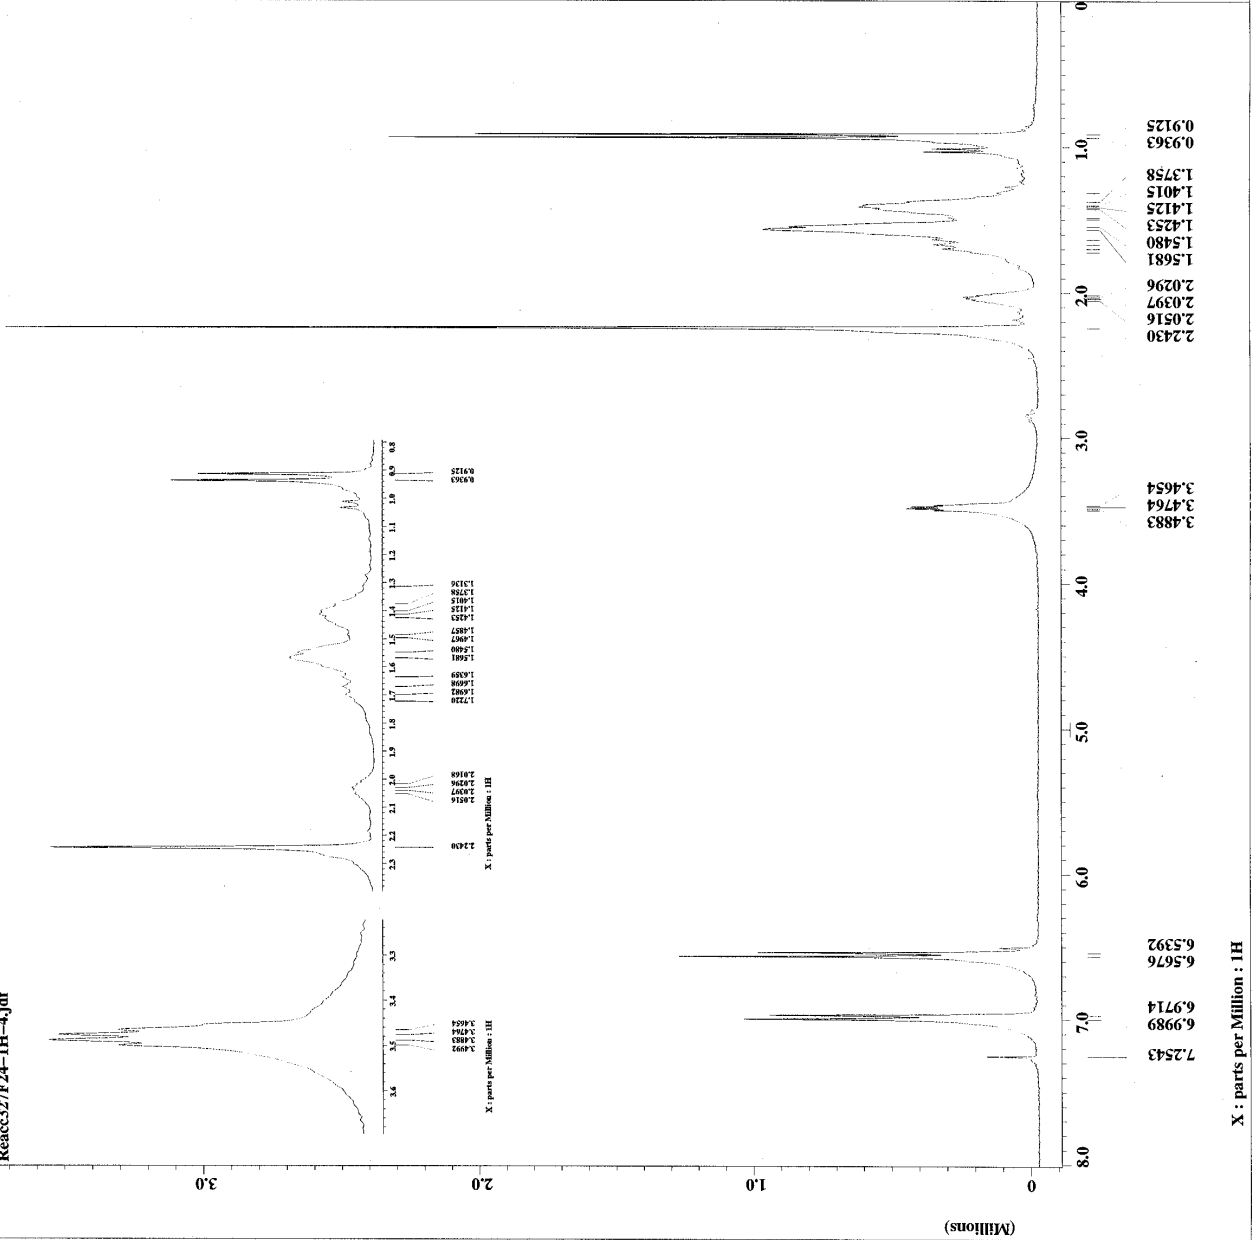

```

File name      = Reacc327F24-1C-2.jdf
Author        =
Experiment    =
Exp. date     =
Sample ID     = Laura_pulse_dec
Solvent       = CHLOROFORM-D
Creation time  = 15-DEC-2007 00:21:45
Revision time = 20-DEC-2007 08:55:59
Current time  = 20-DEC-2007 09:00:07

Comment       = Single Pulse with Bro
Data format   = 1D COMPLEX
Dir. size     = 32768
Dir. title    = 13C
Dir. units    = [ppm]
Dimensions    = x
Site          = Eclipse+ 300
Spectrometer = DELTA_NMR

Field strength = 7.0586013[T] (300 [MHz]
X_acq_duration = 1.7334272[s]
X_domain       = 13C
X_freq         = 75.56823426 [MHz]
X_offset       = 30 [ppm]
X_resolution   = 32768
X_points       = 4
X_sweep        = 0.57689184 [Hz]
X_resolution   = 18.90359168 [kHz]
Irr_domain    = 1H
Irr_sweep     = 18.90359168 [kHz]
Irr_freq      = 300.52965592 [MHz]
Irr_offset    = 5 [ppm]
Clipped       = TRUE
Mod_return    = 1
Scans         = 8000
Total_scans   = 8000

X_90_width    = 11.3 [us]
X_acq_time    = 1.7334272 [s]
X_angle       = 30 [deg]
X_pulse       = 3.76666667 [us]
Initial_wait  = 1 [s]
Phase_preset = 3 [us]
Recvr_gain    = 30
Relaxation_delay = 1 [s]
Temp_get      = 17.8 [dc]
Unblank_time  = 2 [us]
  
```

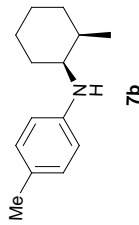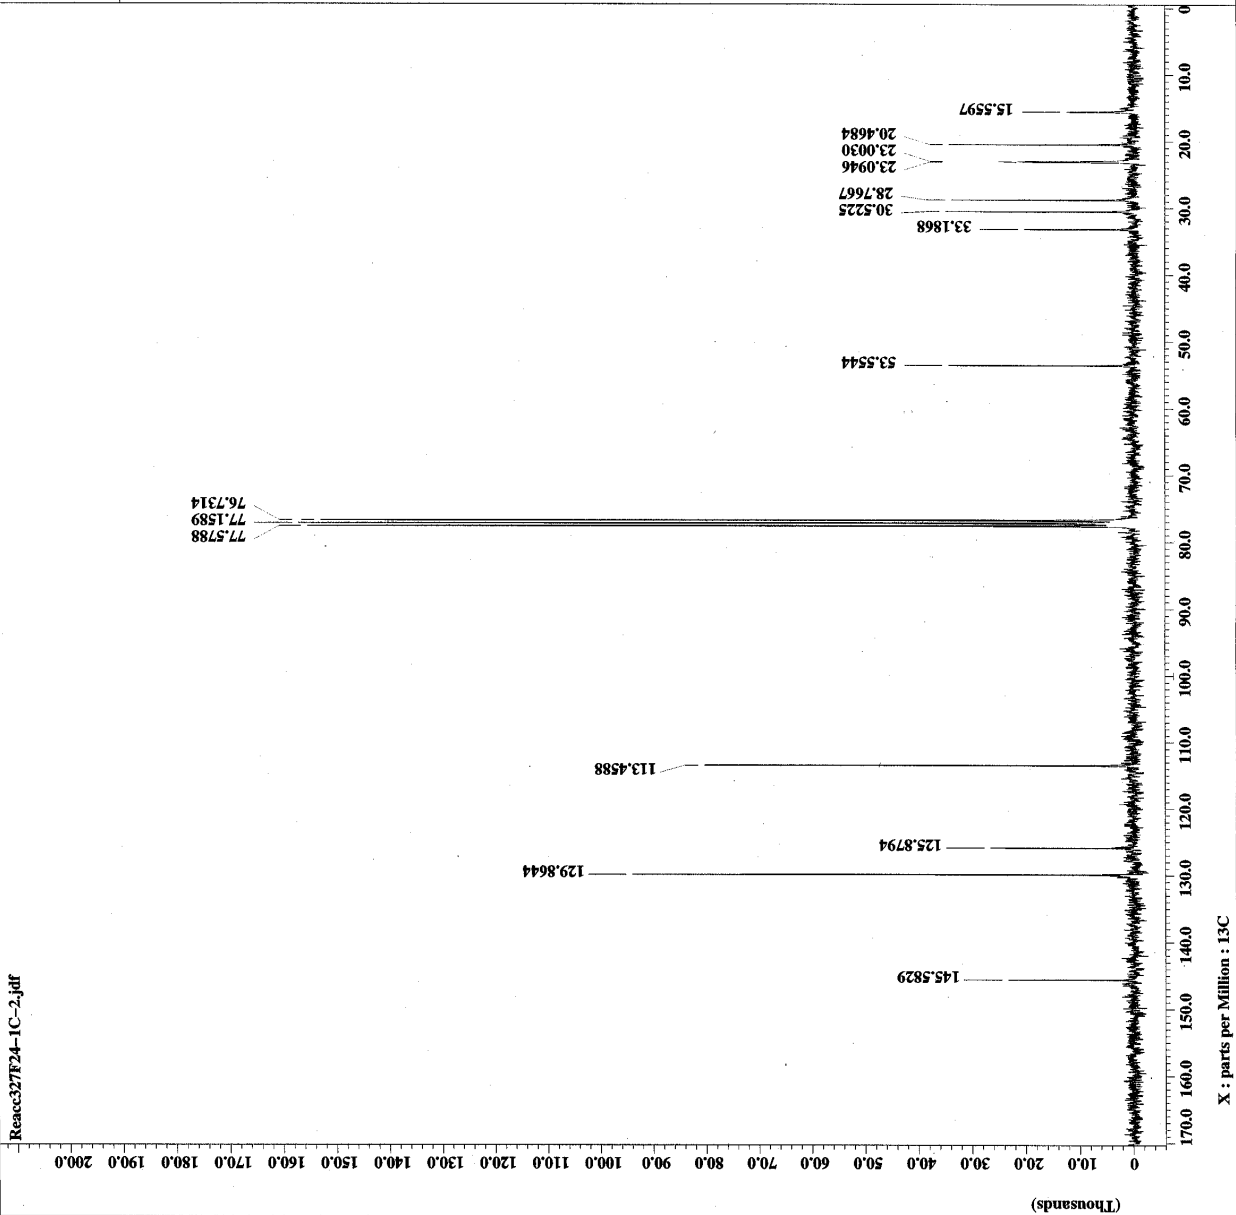

File: 1236-Reac327-2  
 Sample: Dr-Cabrera  
 Instrument: JEOL GCmate  
 Inlet: GC

Date Run: 06-02-2009 (Time Run: 08:50:34)

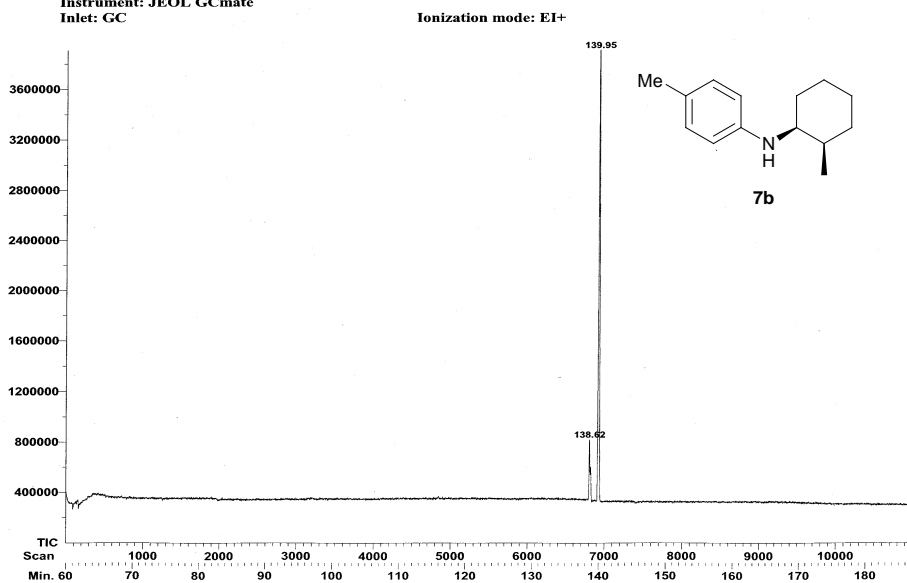

File: 1236-Reac327-2  
 Sample: Dr-Cabrera  
 Instrument: JEOL GCmate  
 Inlet: GC

Date Run: 06-02-2009 (Time Run: 08:50:34)

Ionization mode: EI+

Scan: 6805 R.T.: 138.62  
 Base: m/z 146; 5.1%FS TIC: 838064

#Ions: 19

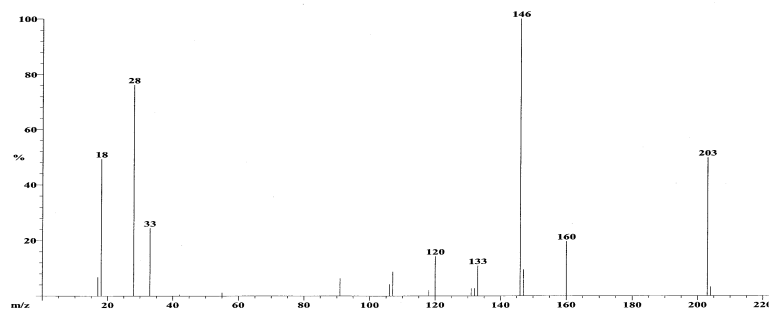

File: 1236-Reac327-2  
 Sample: Dr-Cabrera  
 Instrument: JEOL GCmate  
 Inlet: GC

Date Run: 06-02-2009 (Time Run: 08:50:34)

Ionization mode: EI+

Scan: 6921 R.T.: 139.95  
 Base: m/z 146; 27%FS TIC: 3925680

#Ions: 43

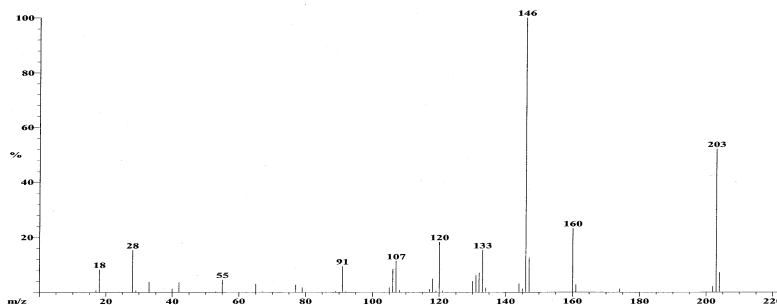

### Peak Table

| Peak Label | RIC | Scan Range | Baseline at | Total Area | Background | Peak Area |
|------------|-----|------------|-------------|------------|------------|-----------|
| 138.62     | TIC | 6793-6829  | 6784-6788   | 14388850   | 8469663    | 5919187   |
| 139.95     | TIC | 6905-6941  | 6895-6899   | 49880378   | 8273759    | 41606619  |

UNAM, INSTITUTO DE QUIMICA, apg  
 Dr. Armando Cabrera / Laura R. P.  
 Clave: Reacc. 507-Et  
 Disolvente: CDCl<sub>3</sub>

<sup>1</sup>H  
 Eclipse: 300 MHz Jeol (E)  
 10-12-08  
 No. Reg. 4116

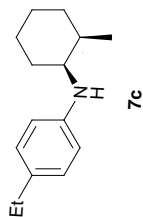

1.245  
 1.220  
 1.195  
 0.959  
 0.936

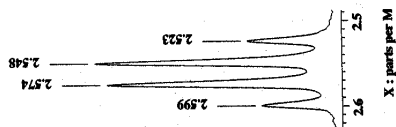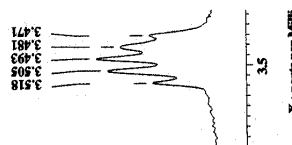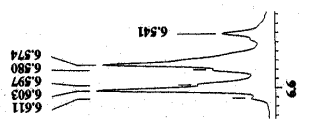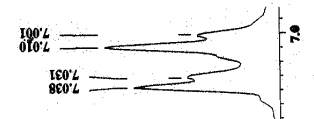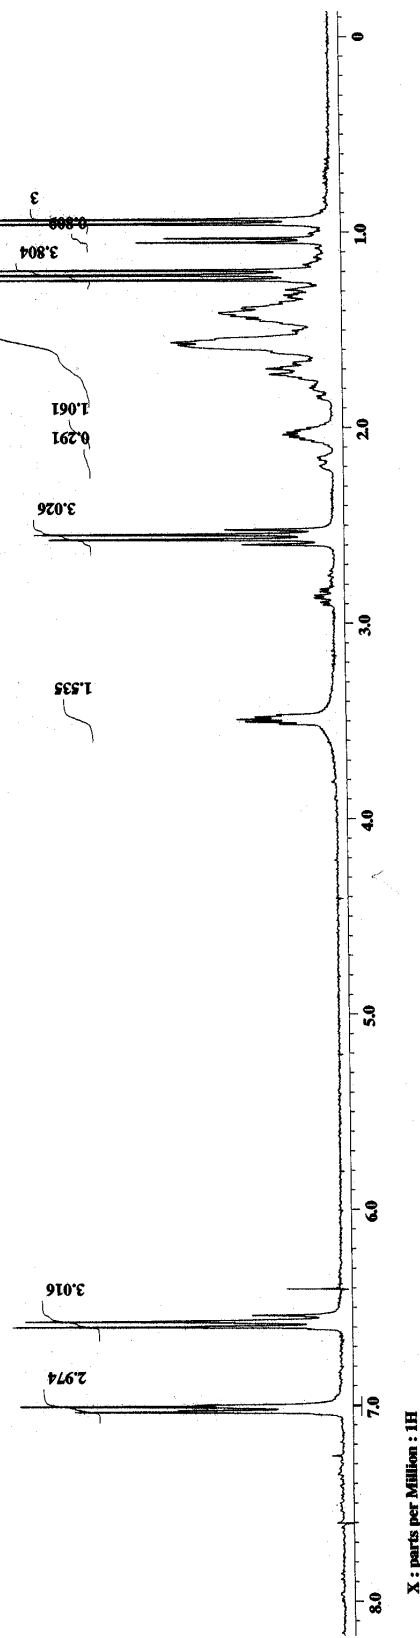

UNAM, INSTITUTO DE QUIMICA, apg

Dr. Armando Cabezas / Laura R. P.

Clave: Reacc. 507-B

Disolvente: CDCl<sub>3</sub>

13C

Eclipse: 900 MHz Isol (E)

10-12-08

No. Reg. 4116

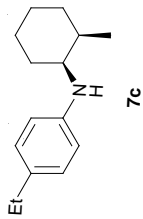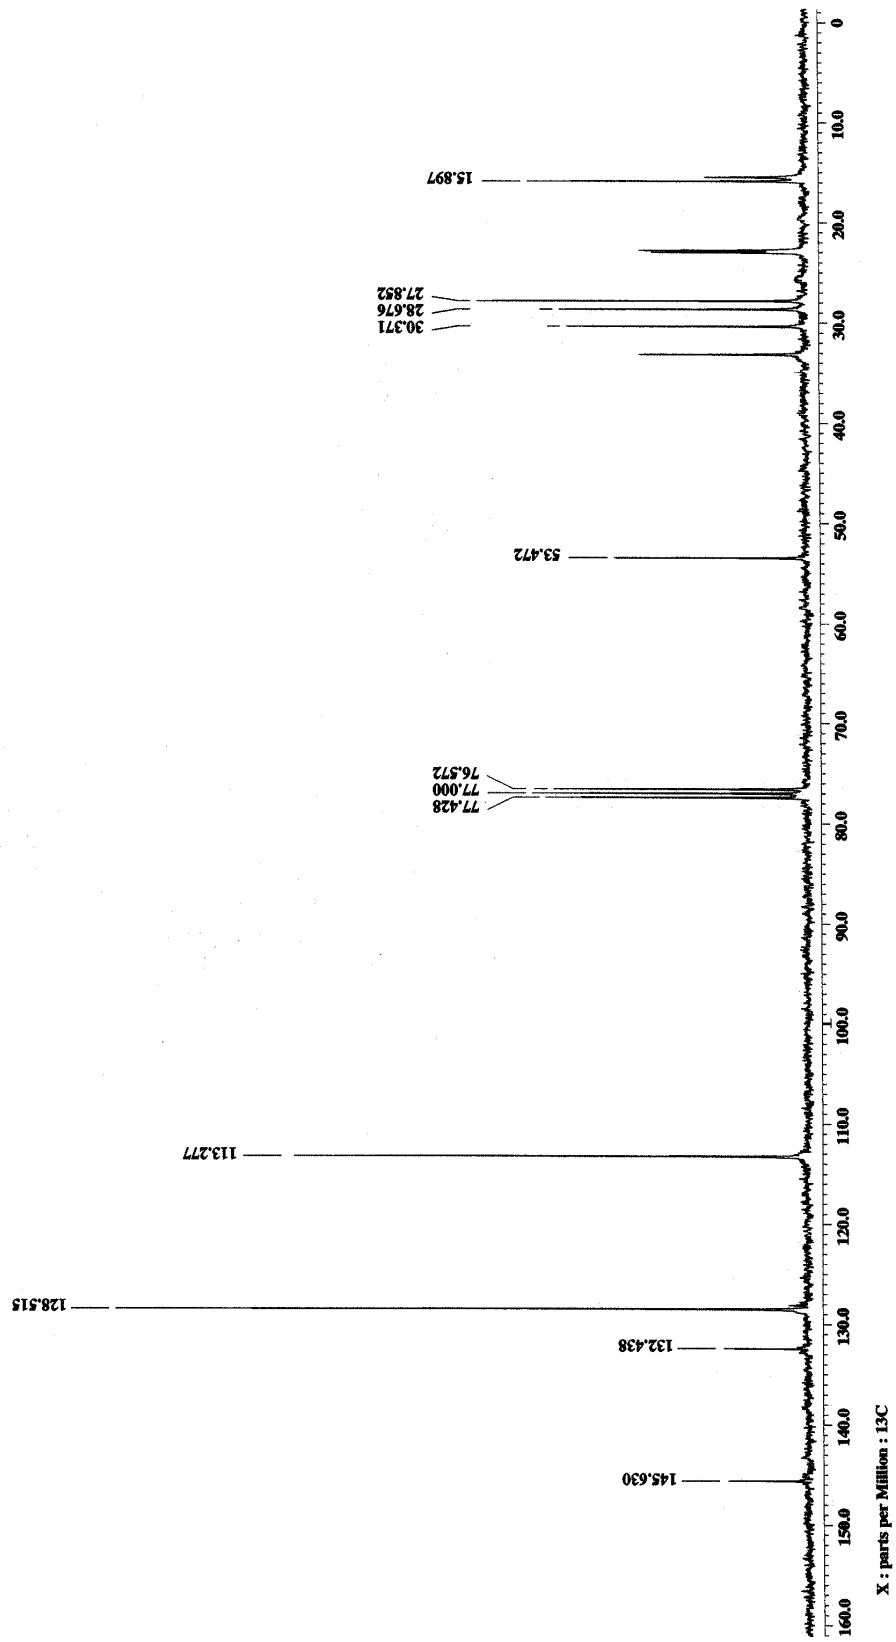



[ TIC ]

Data : Dr-Cabrera-Armando-515

Date : 02-Apr-120 09:44

Sample: 799 G Rx 131 AX505HA

Note :

Inlet : GC

Ion Mode : EI+

Ion Species : Normal Ion

TIC Range : m/z 5 to 650

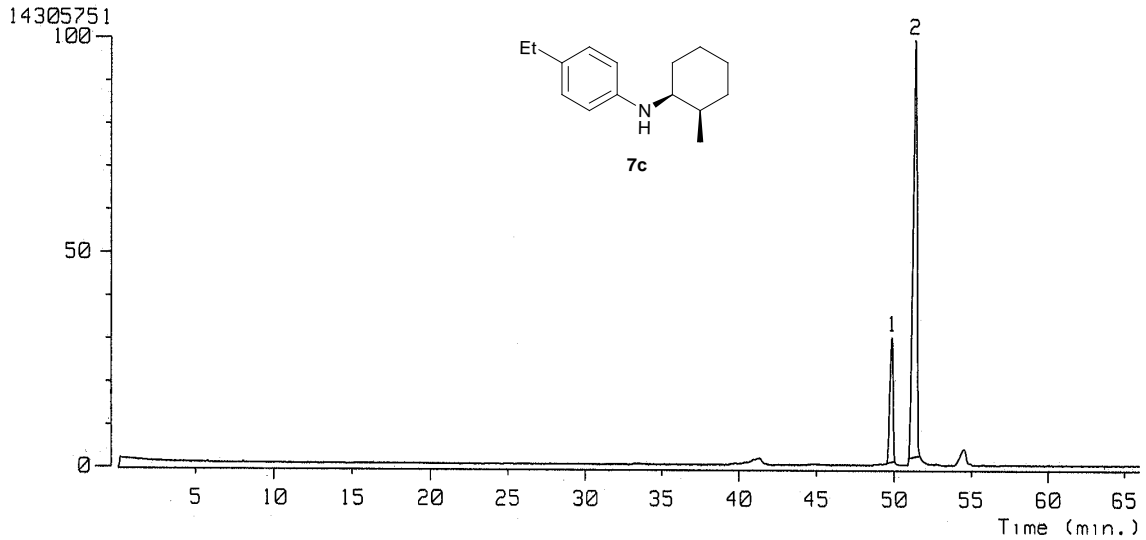

| No. | RT [min] | Area     | Area% | Height  | Height% | Width [sec] | INTEG |
|-----|----------|----------|-------|---------|---------|-------------|-------|
| 1   | 49.87    | 5331.06  | 19.06 | 396.18  | 23.05   | 12.64       | BV    |
| 2   | 51.44    | 22645.32 | 80.94 | 1322.93 | 76.95   | 16.07       | VB    |

[ TIC ]

Data : Dr-Cabrera-Armando-515

Date : 02-Apr-120 09:44

Sample: 799 G Rx 131 AX505HA

Note :

Inlet : GC

Ion Mode : EI+

Ion Species : Normal Ion [MF-Linear]

TIC Range : m/z 5 to 650

Output RT Range : 0.00 to 65.99 min

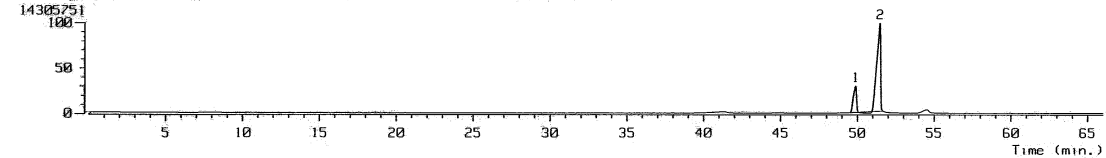

[ Mass Spectrum ]

RT : 49.87 min

Scan# : 3741-3716-3876

Temp : 0.0 deg.C

Ion Mode : EI+

Int. : 96.78

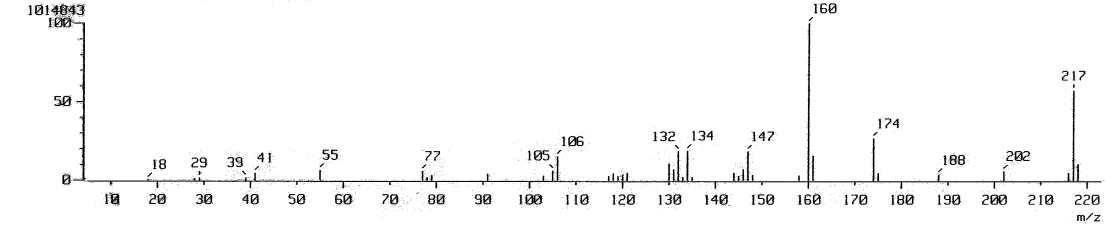

[ Mass Spectrum ]

RT : 51.44 min

Scan# : 3859-3716-3876

Temp : 0.0 deg.C

Ion Mode : EI+

Int. : 343.36

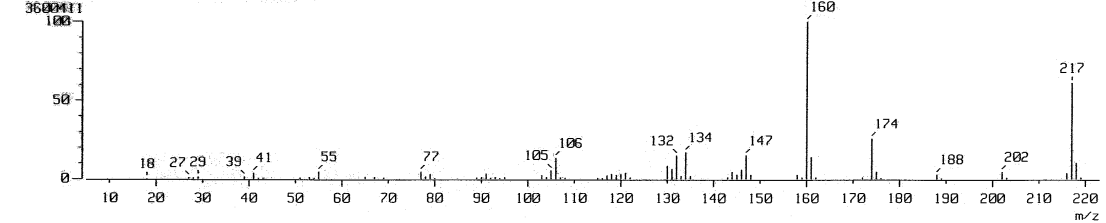

Reacc525F28-1H-6.jdf

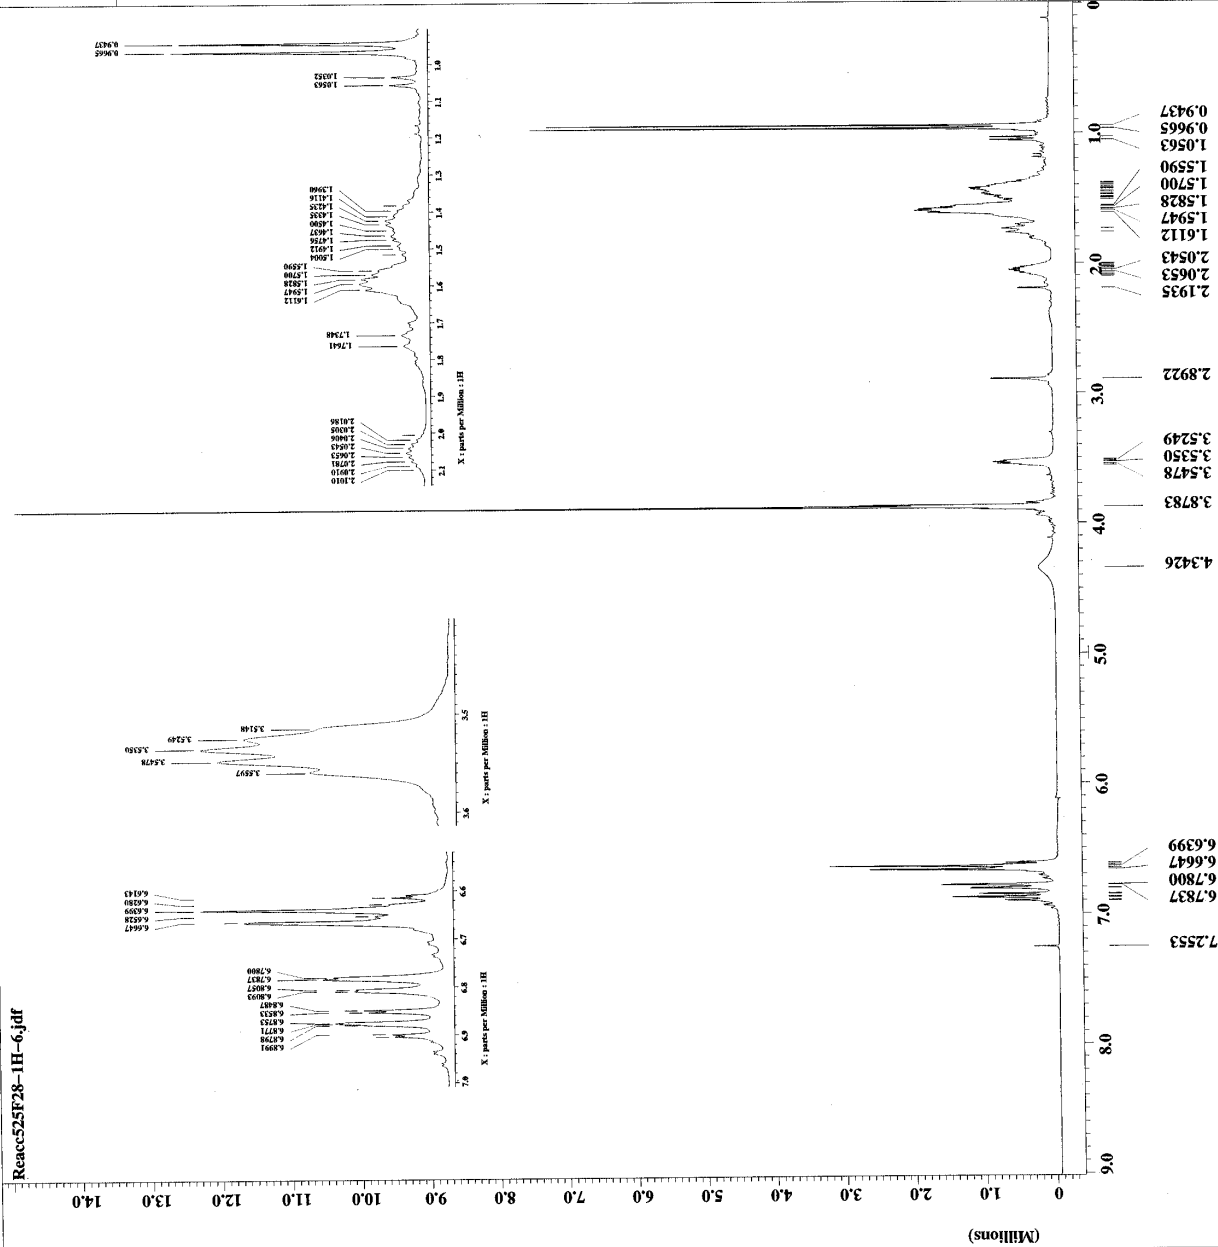

**JEOL**

```

Filename = Reacc525F28-1H-6.jdf
Author = Cabrera
Experiment = single_pulse.exp
Sample_id =
SOLVENT = CDCl3
Creation_time = 8-DEC-2008 00:57:24
Revision_time = 19-FEB-2009 09:19:13
Current_time = 19-FEB-2009 09:19:30

Comment = Single Pulse Experiment
Data_format = 1D COMPLEX
Dir_name = 16384
Dir_title = 1H
Dim_units = [ppm]
Dimensions = X
Site = Eclipse+ 300
Spectrometer = DELTA_NMR

Field_strength = 7.0586013[T] (300[MHZ]
X_acq_duration = 3.6339712[s]
X_domain = 1H
X_freq = 300.52965592[MHZ]
X_offset = 5[ppm]
X_points = 16384
X_prescans = 0
X_resolution = 0.27518105[Hz]
X_sweep = 4.50856628[MHZ]
Clipped = FALSE
Mod_return = 1
Total_scans = 3

X_90_width = 9.5[us]
X_acq_time = 3.6339712[s]
X_angle = 45[deg]
X_pulse = 4.75[us]
Initial_wait = 1[s]
Phase_preset = 3[us]
Recvr_gain = 16
Relaxation_delay = 1[s]
Temp_get = 18.9[dc]
Unblank_time = 2[us]

```

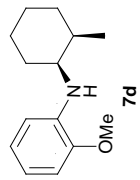

```

Filename = Reacc525F28-13C-2.jdf
Author = Cabrera
Experiment = single_pulse_dec
Sample_id = laura
Solvent = CDCl3
Creation_time = 8-DEC-2008 01:40:57
Revision_time = 19-FEB-2009 09:45:59
Current_time = 19-FEB-2009 09:47:20
Comment = Single Pulse with Bro
Data_format = 1D COMPLEX
Pulse_program = zgpg30
Pulse_sequence = 13C
Pulse_width = 32768
Pulse_delay = 13C
Pulse_offset = 13C
Pulse_phase = X
Pulse_modulation = ECLIPSE+ 300
Spectrometer = DELTA_NMR
Field_strength = 7.0586013[T] (300[MHZ]
Acq_duration = 1.7334272[s]
F1_domain = 13C
F2_domain = 13C
F1_freq = 75.56823426[MHZ]
F2_freq = 300.52965592[MHZ]
F1_offset = 32768
F2_offset = 4
F1_resolution = 0.57689184[Hz]
F2_resolution = 18.90359168[MHz]
Sweep_rate = 18
Irr_domain = 1H
Irr_freq = 300.52965592[MHZ]
Irr_offset = 51ppm
Clipped = FALSE
Mod_return = 1
Scans = 320
Total_scans = 930
X_90_width = 11.3[us]
X_90_time = 1.7334272[s]
X_acq_time = 30[sec]
X_pulse = 3.76666667[us]
Initial_wait = 1[s]
Phase_preset = 3[us]
Recvr_gain = 30
Relaxation_delay = 1[s]
Temp_set = 20.6[degC]
Unblank_time = 2[us]
  
```

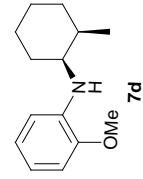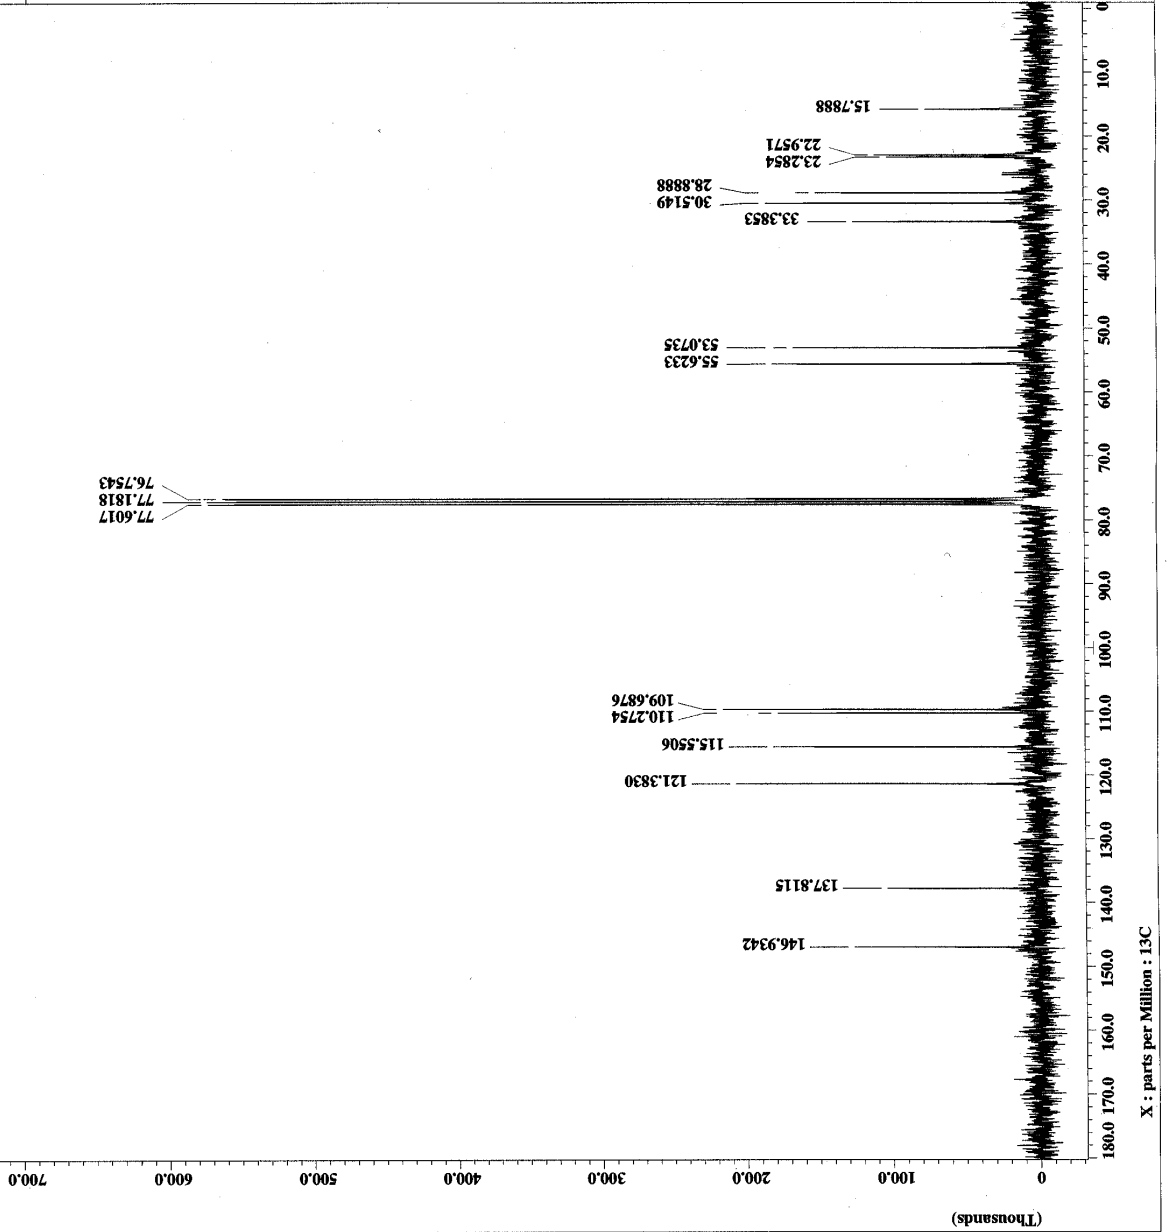

X : parts per Million : 13C

File: 1209-Reac525  
 Sample: Dr-Cabrera  
 Instrument: JEOL GCmate  
 Inlet: GC

Date Run: 05-28-2009 (Time Run: 15:26:08)

Ionization mode: EI+

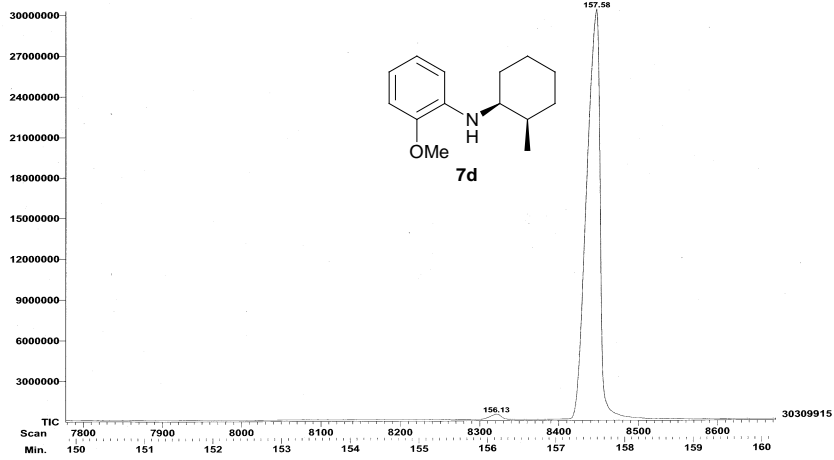

File: 1209-Reac525  
 Sample: Dr-Cabrera  
 Instrument: JEOL GCmate  
 Inlet: GC

Date Run: 05-28-2009 (Time Run: 15:26:08)

Ionization mode: EI+

Scan: 8321 R.T.: 156.13  
 Base: m/z 162; 3.5%FS TIC: 474176

#Ions: 16

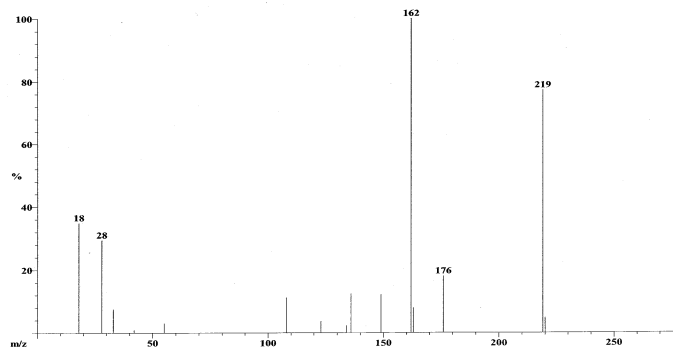

File: 1209-Reac525  
 Sample: Dr-Cabrera  
 Instrument: JEOL GCmate  
 Inlet: GC

Date Run: 05-28-2009 (Time Run: 15:26:08)

Ionization mode: EI+

Scan: 8447 R.T.: 157.58  
 Base: m/z 219; 99.6%FS TIC: 30437712

#Ions: 109

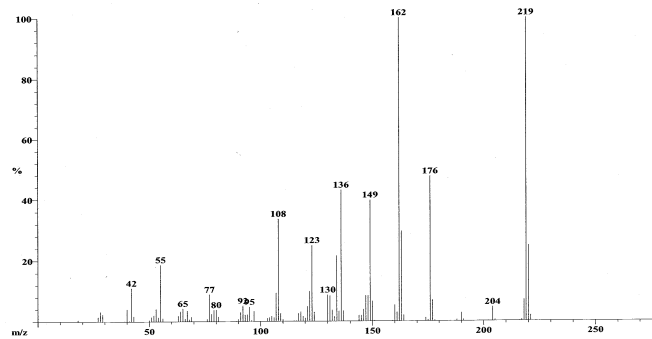

Peak Table

| Peak Label | RIC | Scan Range | Baseline at | Total Area | Background | Peak Area |
|------------|-----|------------|-------------|------------|------------|-----------|
| 156.13     | TIC | 8301-8337  | 8339-8343   | 6642961    | 2632589    | 4010372   |
| 157.58     | TIC | 8421-8457  | 8469-8473   | 397293413  | 12381400   | 384912013 |

INSTITUTO DE QUIMICA, UNAM / EHS

Dr. A. Cabrera/Laura R. P.

Clave: reacc341

disolvente: CDCl<sub>3</sub>

eclipse 300 MHz Jeol (E)

10-03-08

No. de registro: 0957

Hidrogeno-1

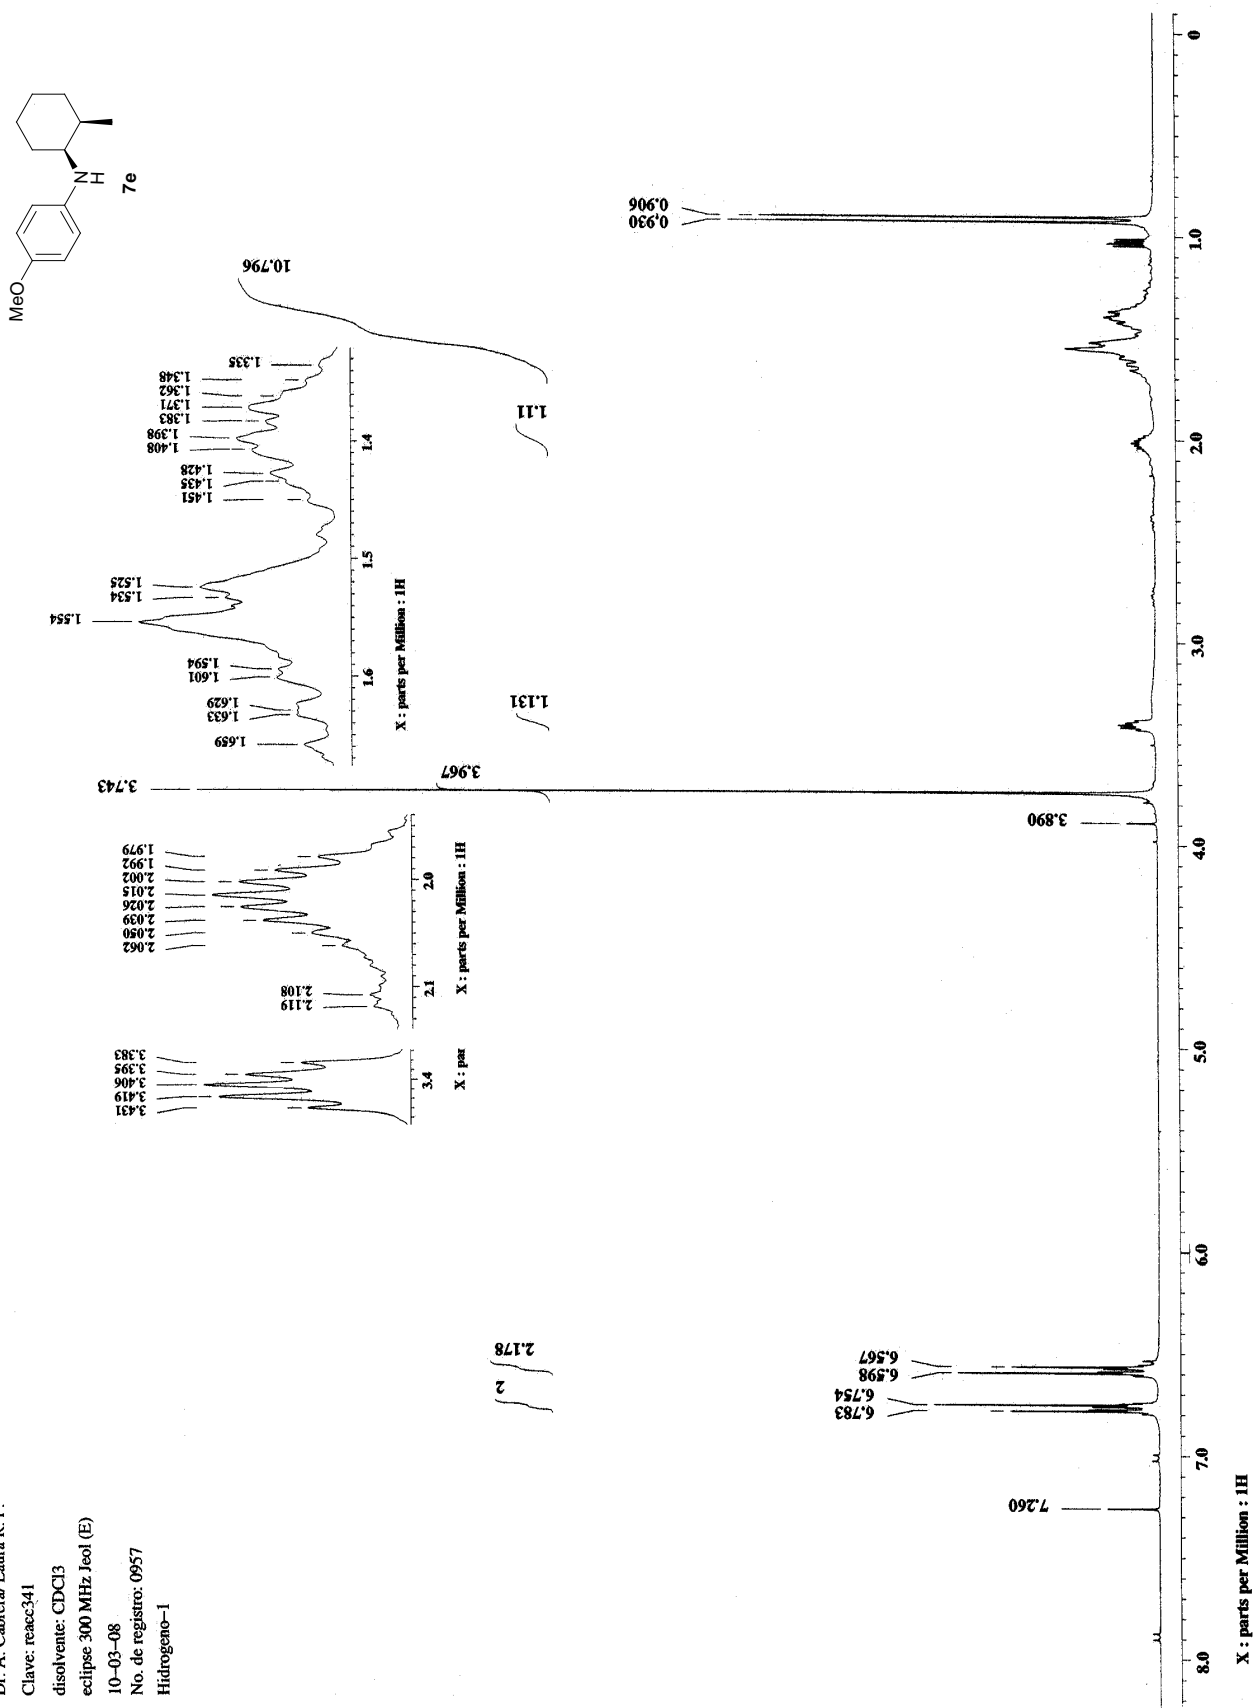

INSTITUTO DE QUIMICA, UNAM / EHS

Dr. A. Cabrera/ Laura R. P.

Clave: Reacc341

Disolvente: CDCl<sub>3</sub>

Carbono-13

Eclipse 300 MHz Jeol (E)

10-03-08

No. de registro: 0957

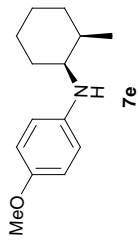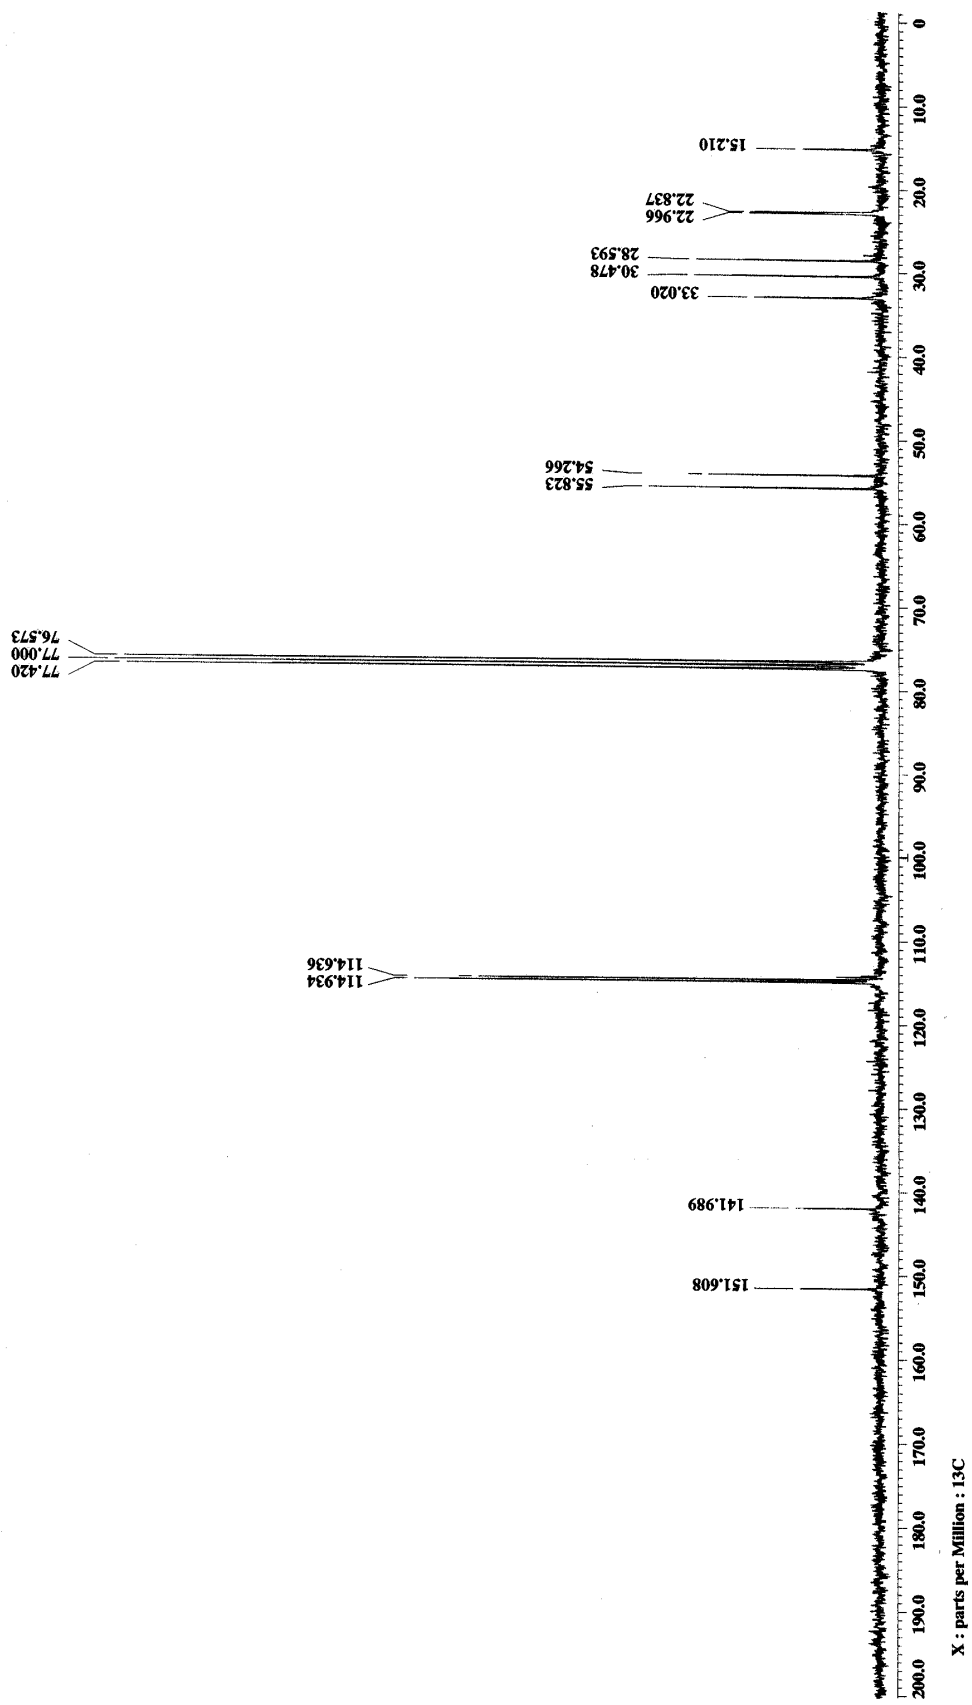

File: 1214-REACC341  
 Sample: Dr-Cabrera  
 Instrument: JEOL GCmate  
 Inlet: GC

Date Run: 06-01-2009 (Time Run: 11:53:06)

Ionization mode: EI+

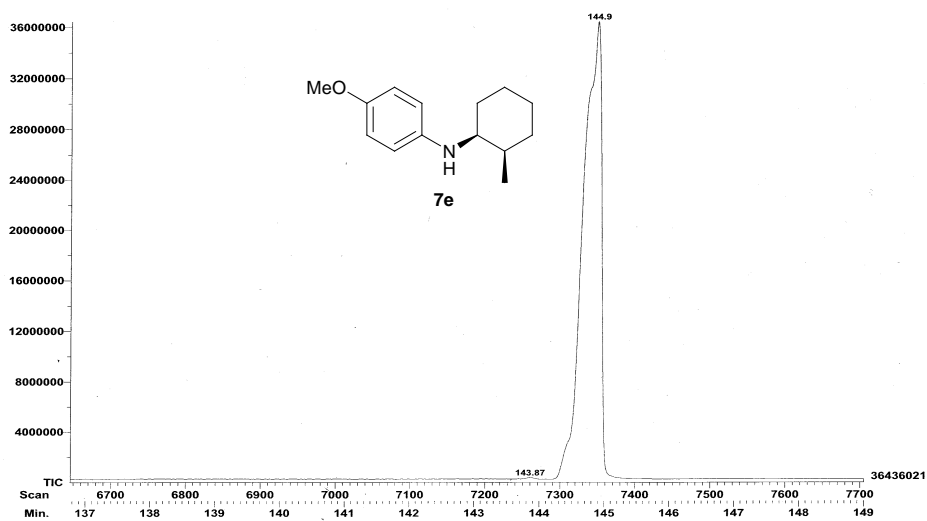

File: 1214-REACC341  
 Sample: Dr-Cabrera  
 Instrument: JEOL GCmate  
 Inlet: GC

Date Run: 06-01-2009 (Time Run: 11:53:06)

Ionization mode: EI+

Scan: 7260 R.T.: 143.87  
 Base: m/z 18; 3.3%FS TIC: 383712

#Ions: 6

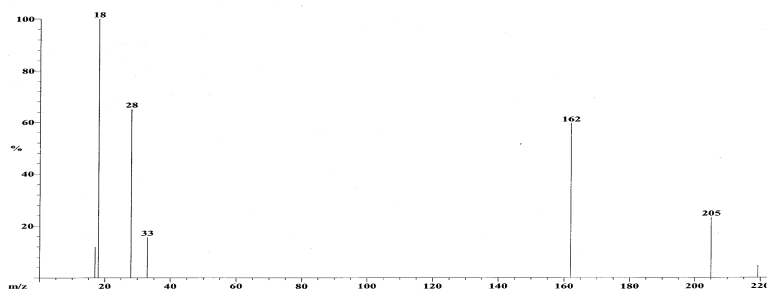

File: 1214-REACC341  
 Sample: Dr-Cabrera  
 Instrument: JEOL GCmate  
 Inlet: GC

Date Run: 06-01-2009 (Time Run: 11:53:06)

Ionization mode: EI+

Scan: 7350 R.T.: 144.9  
 Base: m/z 219; 99.6%FS TIC: 36824000

#Ions: 124

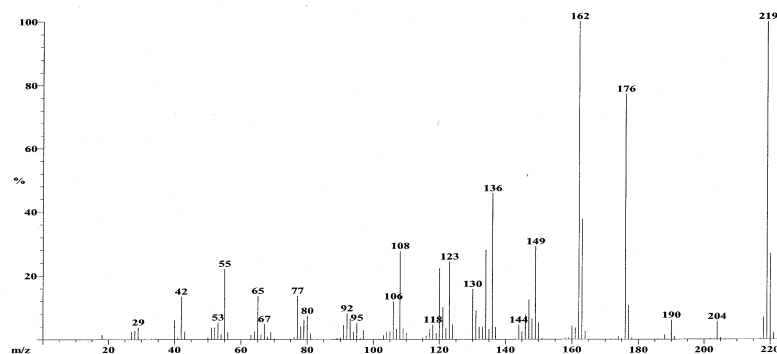

| Peak Label | RIC | Scan Range | Baseline at | Total Area | Background | Peak Area |
|------------|-----|------------|-------------|------------|------------|-----------|
| 143.87     | TIC | 7247-7283  | 7235-7239   | 7461277    | 6447096    | 1014181   |
| 144.9      | TIC | 7324-7360  | 7372-7376   | 637084535  | 10078603   | 627005932 |

INSTITUTO DE QUIMICA, UNAM/EHS  
 Dr. A. Cabrera/Laura R. P.  
 Clave: Reacc519F22  
 Disolvente: CDCl3  
 Hidrogeno-1  
 Eclipse 300 MHz Jeol (E)  
 30-01-09  
 No. de registro: 0343

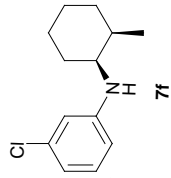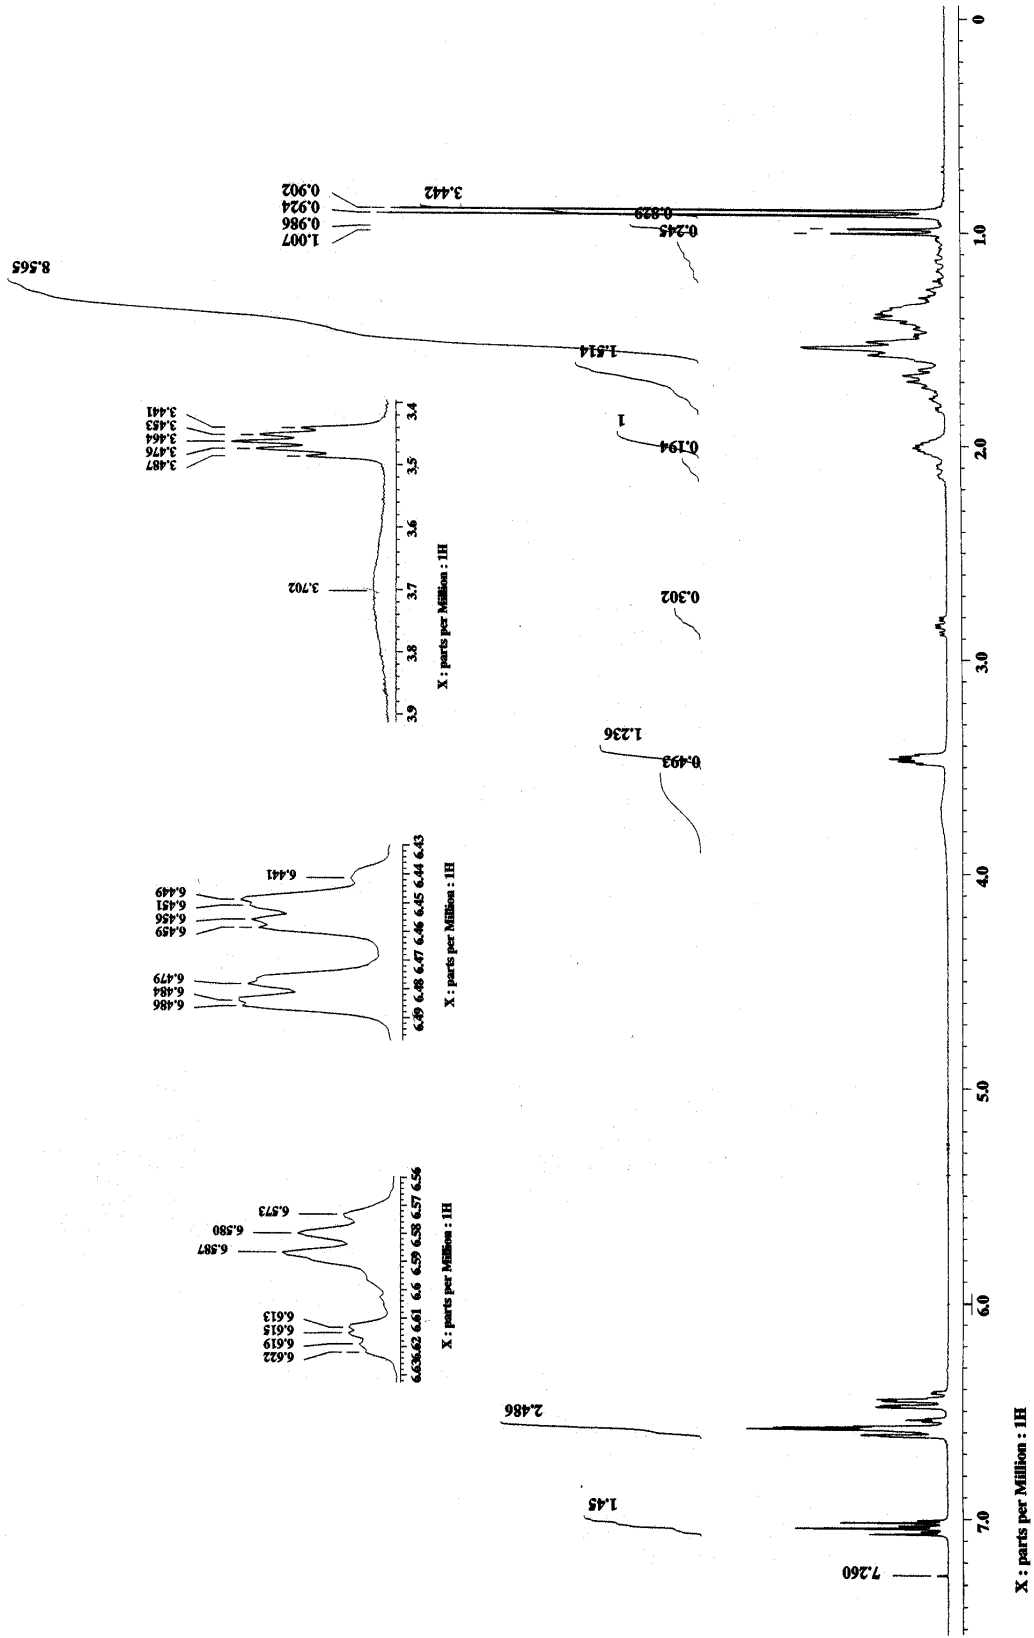



INSTITUTO DE QUIMICA, UNAM/EHS

Dr. A. Cabrera/Laura R. P.

Clave: Reacc519F22

Disolvente: CDCl<sub>3</sub>

Carbono-13

Eclipse 300 MHz Jeol (E)

30-01-09

No. de registro: 0343

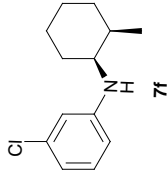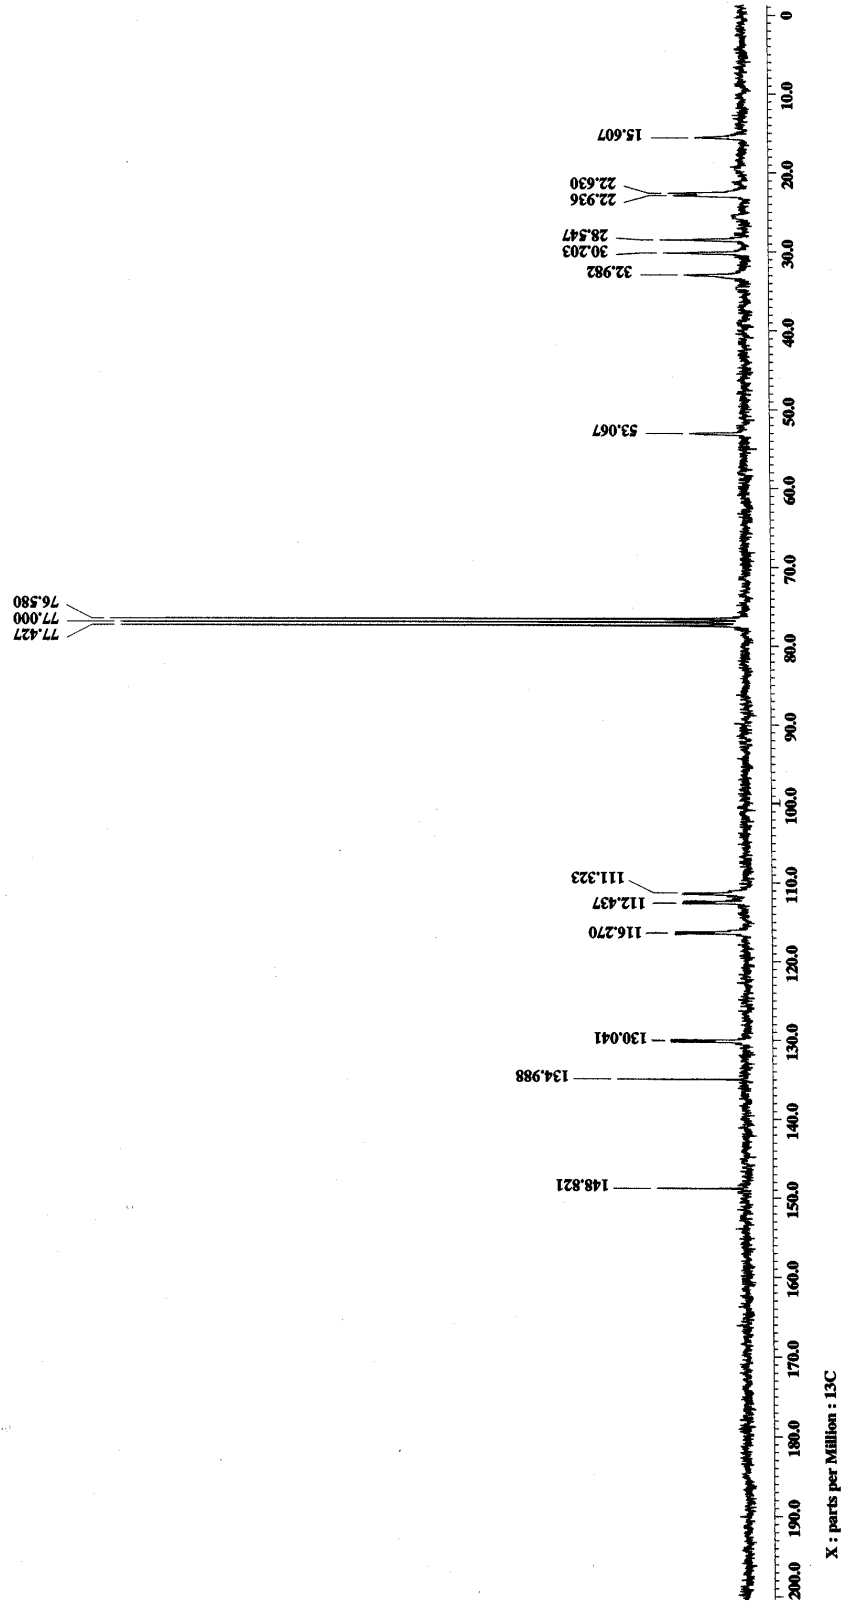

[ TIC ]

Data : Dr-Cabrera-Armando-944  
Sample: 219 G reacc 519 AX505HA

Date : 29-Jan-120 15:20

Note :

Inlet : GC

Ion Mode : EI+

Ion Species : Normal Ion

TIC Range : m/z 5 to 650

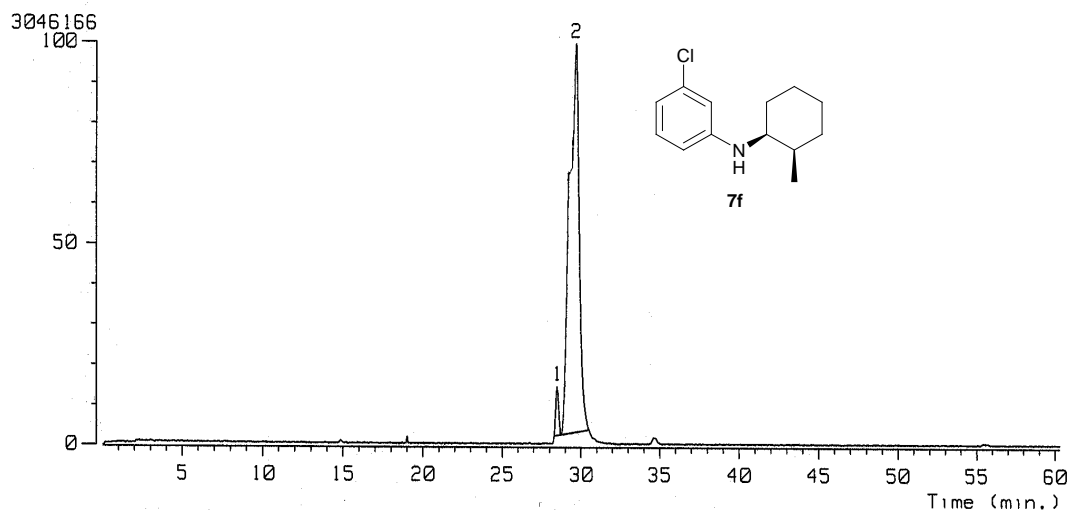

| No. | RT [min] | Area     | Area% | Height | Height% | Width [sec] | INTEG |
|-----|----------|----------|-------|--------|---------|-------------|-------|
| 1   | 28.48    | 443.20   | 3.40  | 35.05  | 11.12   | 11.87       | BV    |
| 2   | 29.72    | 12604.04 | 96.60 | 280.19 | 88.88   | 42.24       | VB    |

[ TIC ]

Data : Dr-Cabrera-Armando-944  
Sample: 219 G reacc 519 AX505HA

Date : 29-Jan-120 15:20

Note :

Inlet : GC

Ion Mode : EI+

Ion Species : Normal Ion [MF-Linear]

TIC Range : m/z 5 to 650

Output RT Range : 0.00 to 60.31 min

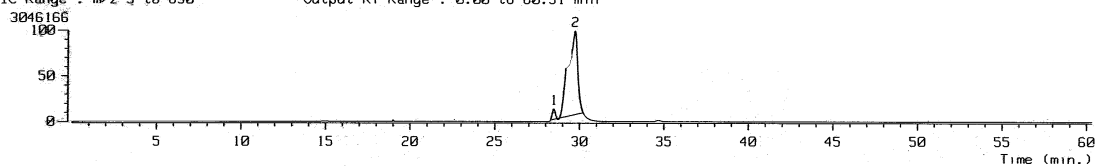

[ Mass Spectrum ]

RT : 28.48 min

Scan# : 2134-2120-2264

Temp : 0.0 deg.C

Ion Mode : EI+

Int. : 7.19

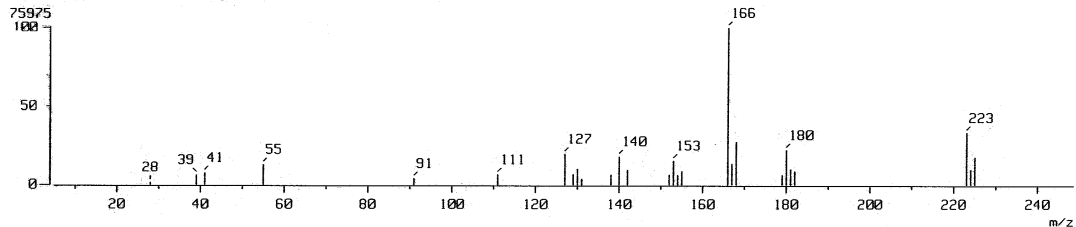

[ Mass Spectrum ]

RT : 29.72 min

Scan# : 2227-2120-2264

Temp : 0.0 deg.C

Ion Mode : EI+

Int. : 56.32

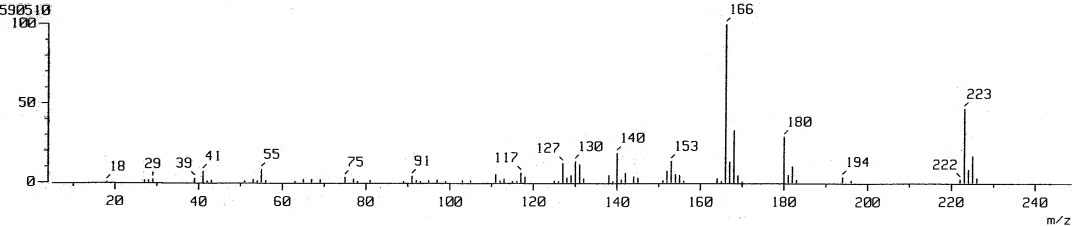

Reacc362-1H-6.jdf

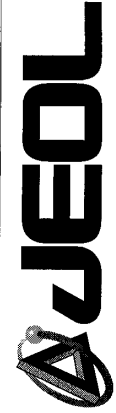

```

Filename = Reacc362-1H-6.jdf
Author = Cabrera
Experiment = single_pulse.exp
Sample_id = Laura
Solvent = CHLOROFORM-D
Creation_time = 11-FEB-2008 22:21:01
Revision_time = 19-DEC-2008 13:44:01
Current_time = 19-DEC-2008 13:45:08

Comment = Single Pulse Experiment
Data_format = 1D COMPLEX
Dir_size = 16384
Dir_title = 1H
Dim_units = [ppm]
Dimensions = X
Site = Eclipse+ 300
Spectrometer = DELTA_NMR

Field_strength = 7.0586013[T] (300[MHz]
X_acq_duration = 3.6339712[s]
X_domain = 1H
X_freq = 300.52965592[MHz]
X_offset = 5[ppm]
X_points = 16384
X_prescans = 0
X_resolution = 0.27518105[Hz]
X_sweep = 4.50856628[MHz]
Clipped = FALSE
Mod_return = 1
Scans = 32
Total_scans = 32

X_90_width = 9.5[us]
X_acq_time = 3.6339712[s]
X_angle = 45[deg]
X_pulse = 4.75[us]
Initial_wait = 1[s]
Phase_preset = 3[us]
Recvr_gain = 17
Relaxation_delay = 1[s]
Temp_get = 19.5[dC]
Unblank_time = 2[us]

```

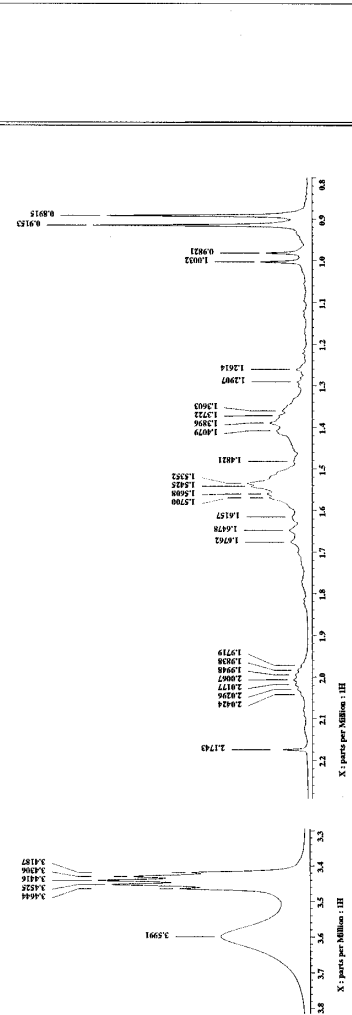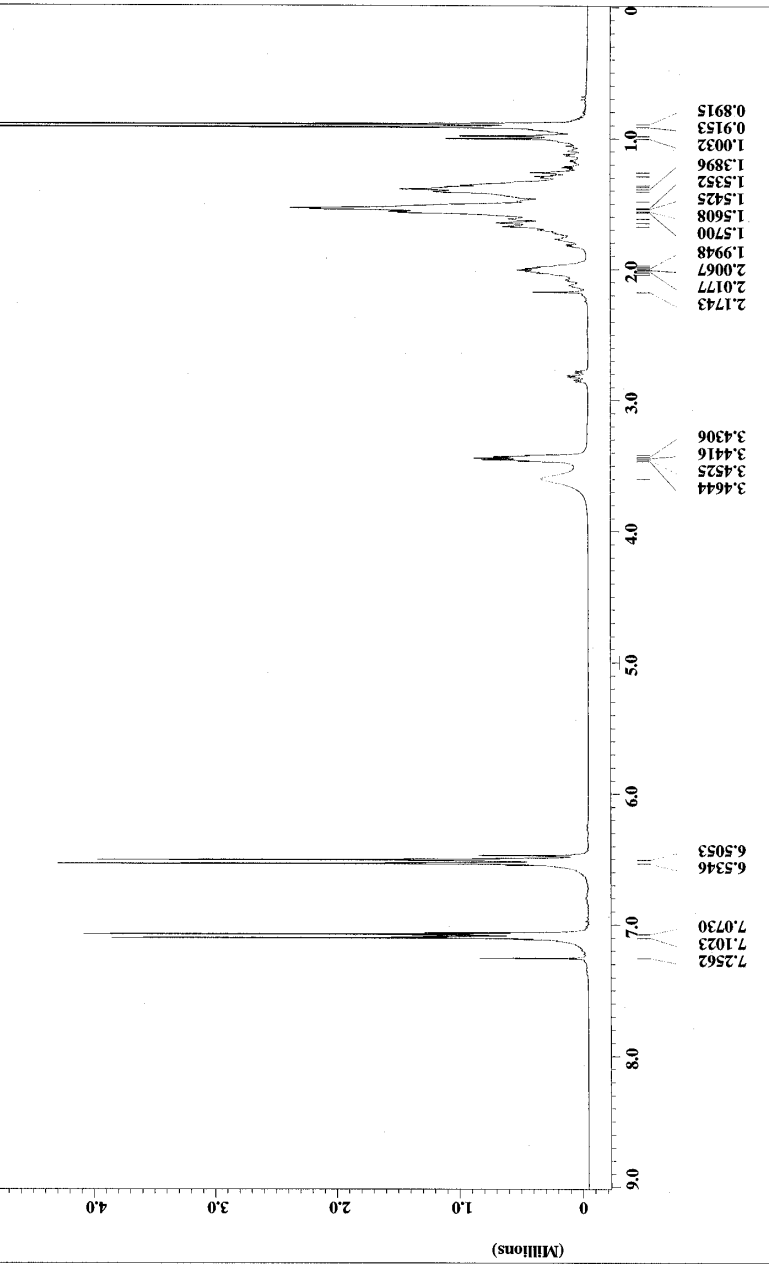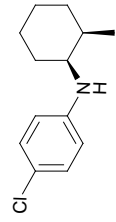

79

X: parts per Million : 1H

Reacc362-13C-4.jdf

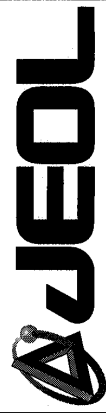

```

File name      = Reacc362-13C-4.jdf
Author        = Cabrera
Experiment    = single_pulse_dec
Sample ID     = Laura
Solvent       = CHLOROFORM-D
Creation time = 11-FEB-2008 23:22:45
Revision time = 19-DEC-2008 13:47:17
Current time  = 19-DEC-2008 13:48:11

Comment       = Single Pulse with Bro
Data format   = ID COMPLEX
Data size     = 32768
Dim title     = 13C
Dim units     = [ppm]
Dimensions    = X
Site          = Eclipse 300
Spectrometer  = DELTA_NMR

Field strength = 7.0586013 [T] (300 [MHz])
X_acq duration = 1.7334272 [s]
X_domain       = 75.6823426 [MHz]
X_freq         = 101 [ppm]
X_offset       = 32768
X_points       = 4
X_resolution   = 0.57689184 [Hz]
X_sweep        = 18.90359168 [MHz]
Irr_domain     = 1H
Irr_freq       = 300.52965592 [MHz]
Irr_offset     = 5 [ppm]
Clipped        = FALSE
Mod_return     = 1
Scans          = 1329
Total_scans    = 1329

X_90 width    = 11.3 [us]
X_acq time    = 1.7334272 [s]
X_angle       = 30 [deg]
X_pulse       = 3.76666667 [us]
Initial_wait  = 1 [s]
Phase_preset  = 3 [us]
Recvr_gain    = 30
Relaxation_delay = 1 [s]
Temp_get      = 21.2 [dC]
Unblank_time  = 2 [us]

```

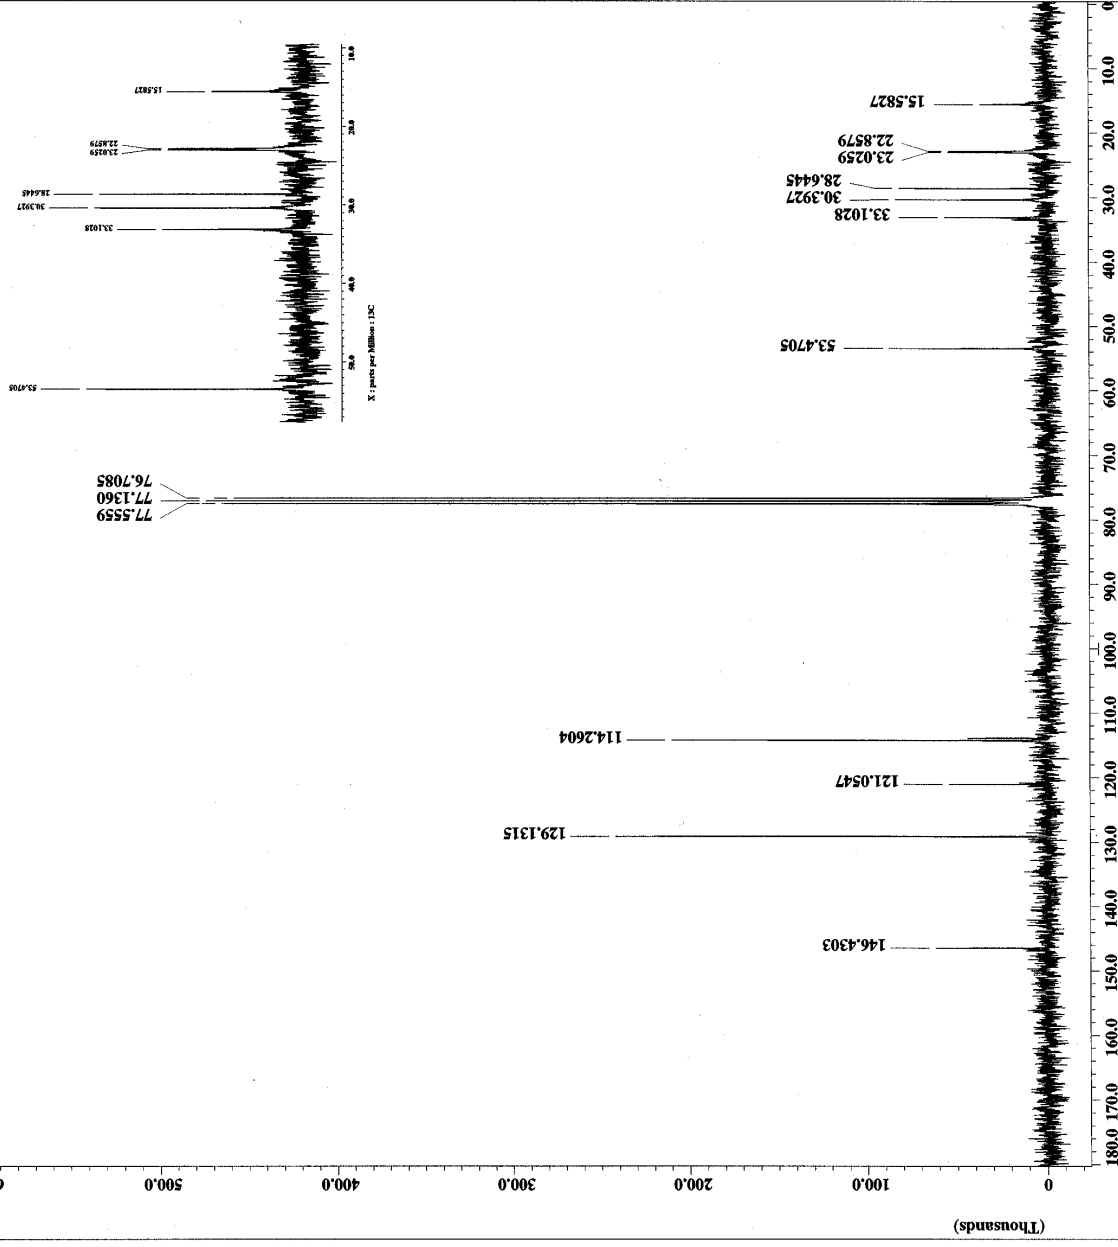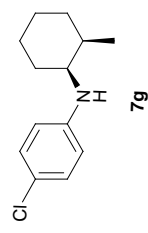

File: 1211-REACC362  
 Sample: Dr-Cabrera  
 Instrument: JEOL GCmate  
 Inlet: GC

Date Run: 05-28-2009 (Time Run: 19:16:44)

Ionization mode: EI+

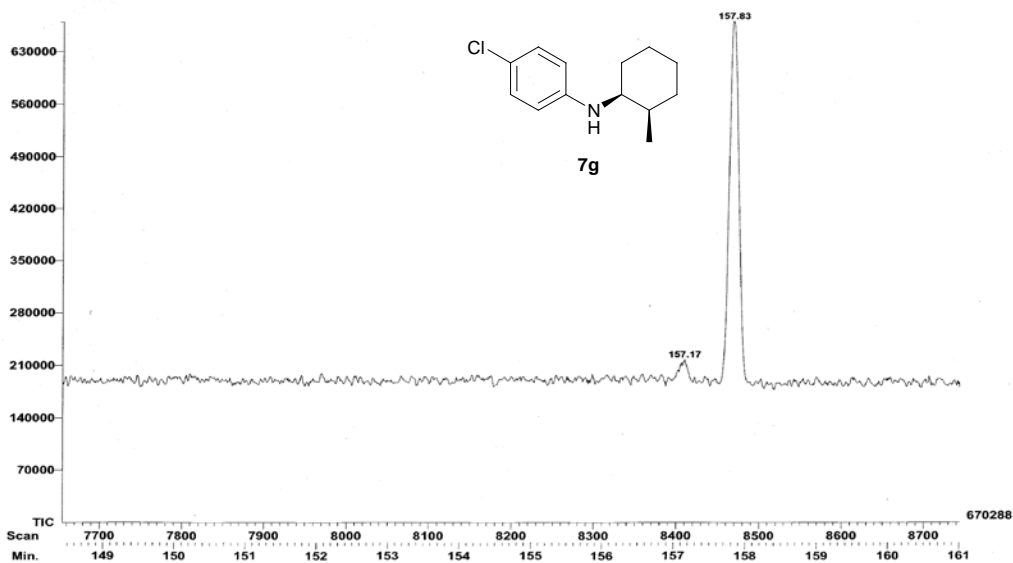

File: 1211-REACC362  
 Sample: Dr-Cabrera  
 Instrument: JEOL GCmate  
 Inlet: GC

Date Run: 05-28-2009 (Time Run: 19:16:44)

Ionization mode: EI+

Scan: 8410 R.T.: 157.17  
 Base: m/z 18; 2%FS TIC: 212576

#Ions: 6

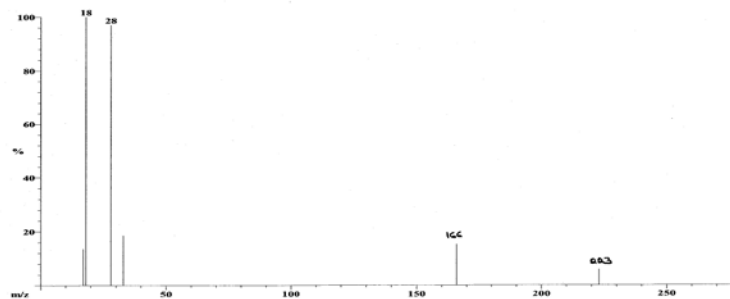

File: 1211-REACC362  
 Sample: Dr-Cabrera  
 Instrument: JEOL GCmate  
 Inlet: GC

Date Run: 05-28-2009 (Time Run: 19:16:44)

Ionization mode: EI+

Scan: 8468 R.T.: 157.83  
 Base: m/z 166; 4%FS TIC: 671136

#Ions: 18

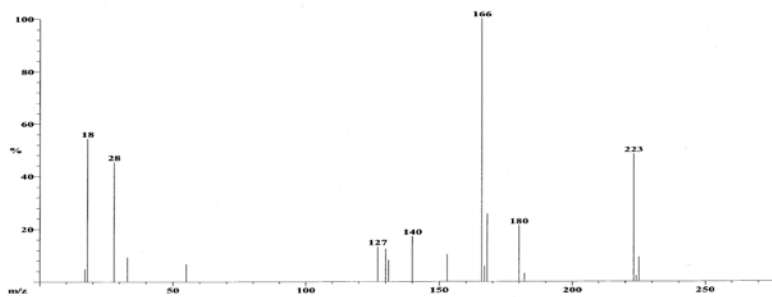

Peak Table

| Peak Label | RIC | Scan Range | Baseline at | Total Area | Background | Peak Area |
|------------|-----|------------|-------------|------------|------------|-----------|
| 157.17     | TIC | 8397-8423  | 8385-8389   | 3629883    | 3379220    | 250663    |
| 157.83     | TIC | 8455-8481  | 8490-8494   | 7812256    | 3305930    | 4506326   |

File Name = Reacc526F28-1H-4.jdf  
Author = Cabrera  
Experiment = single\_pulse.exp  
Sample\_id = Laura  
Solvent = CHLOROFORM-D  
Creation\_time = 9-DEC-2008 02:27:29  
Revision\_time = 20-FEB-2009 11:34:52  
Current\_time = 20-FEB-2009 11:36:25  
Comment = Single Pulse Experiment  
Data\_format = 1D COMPLEX  
Dim\_size = 16384  
Dim\_title = 1H  
Dim\_units = [ppm]  
Dimensions = X  
Site = Eclipse+ 300  
Spectrometer = DELTA\_NMR  
Field\_strength = 7.0586013 [T] (300 [MHZ])  
X\_domain = 1H  
X\_acq\_duration = 3.6339712 [s]  
X\_freq = 300.52965592 [MHZ]  
X\_offset = 7 [ppm]  
X\_points = 16384  
X\_prescans = 0  
X\_resolution = 0.27518105 [Hz]  
X\_sweep = 4.50856628 [kHz]  
C1\_type = FALSE  
Mod\_return = 1  
Scans = 32  
Total\_scans = 32  
X\_90\_width = 9.5 [us]  
X\_acq\_time = 3.6339712 [s]  
X\_angle = 45 [deg]  
X\_pulse = 4.75 [us]  
Initial\_wait = 1 [s]  
Phase\_preset = 3 [us]  
Recvr\_gain = 17  
Relaxation\_delay = 1 [s]  
Temp\_get = 18.9 [dC]  
Unblank\_time = 2 [us]

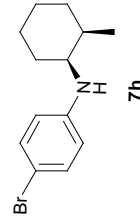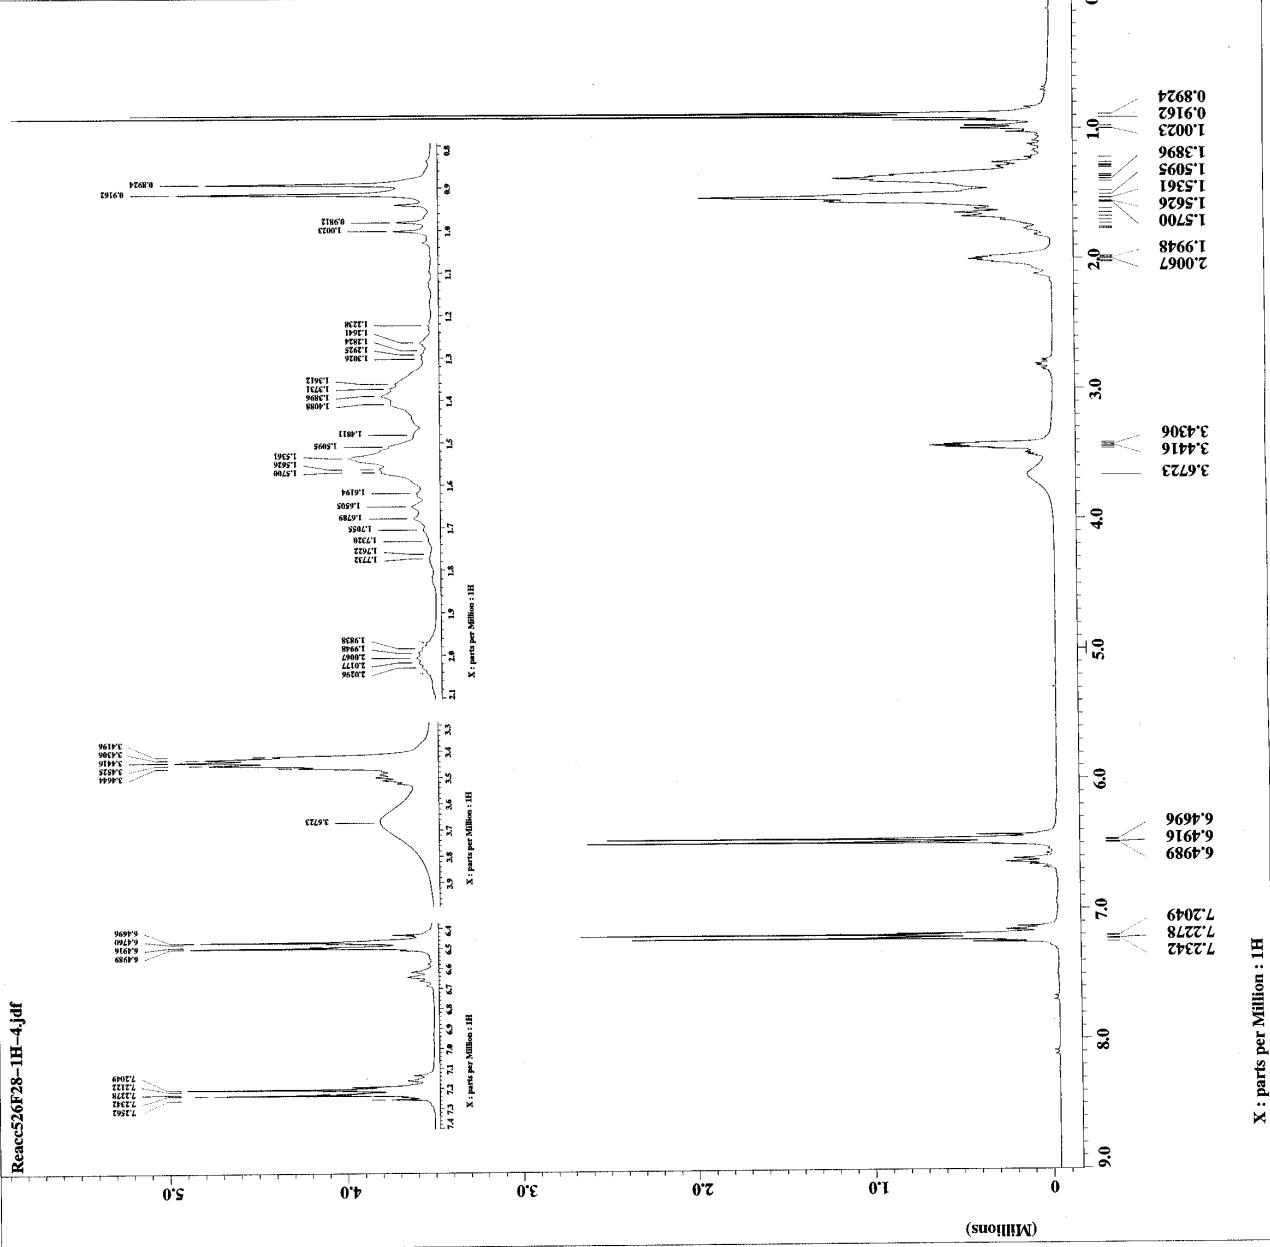

X : parts per Million : 1H

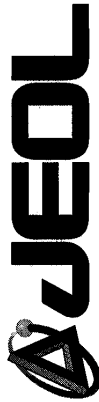

React526F28-13C-3.jdf  
Filename = React526F28-13C-3.jdf  
Author = Cabrera  
Experiment = single\_pulse\_dec  
Sample\_id = Laura  
Solvent = CHLOROFORM-D  
Creation\_Time = 9-DEC-2008 02:35:35  
Revision\_Time = 20-FEB-2009 10:41:54  
Current\_Time = 20-FEB-2009 11:19:36  
Comment = Single Pulse with Bro  
Data\_format = ID COMPLEX  
Data\_size = 32768  
Data\_title = 13C  
Data\_units = ppm  
Dimensions = 1  
Spectrometer = Eclipse+ 300  
Spectrometer = DELTA\_NMR  
Field\_strength = 7.05860131[F] (300 [MHz]  
X\_acq\_duration = 1.7334272[s]  
X\_domain = 13C  
X\_freq = 75.56823426[MHz]  
X\_offset = 100 [ppm]  
X\_points = 32768  
X\_prescans = 4  
X\_resolution = 0.57689184 [Hz]  
X\_sweep = 18.90359168 [kHz]  
Irr\_domain = 1H  
Irr\_freq = 300.52965592 [MHz]  
Irr\_offset = 5 [ppm]  
Clipped = FALSE  
Mod\_return = 1  
Scans = 150  
Total\_scans = 150  
X\_90\_width = 11.3 [us]  
X\_acq\_time = 1.7334272 [s]  
X\_angle = 30.734272 [s]  
X\_delay = 3.76696667 [us]  
X\_pulse\_wait = 1 [s]  
Initial\_wait = 3 [us]  
Phase\_preset = 30  
Recvr\_gain = 30  
Relaxation\_delay = 1 [s]  
Temp\_get = 20.9 [dC]  
Unblank\_time = 2 [us]

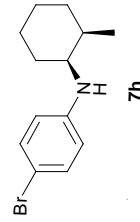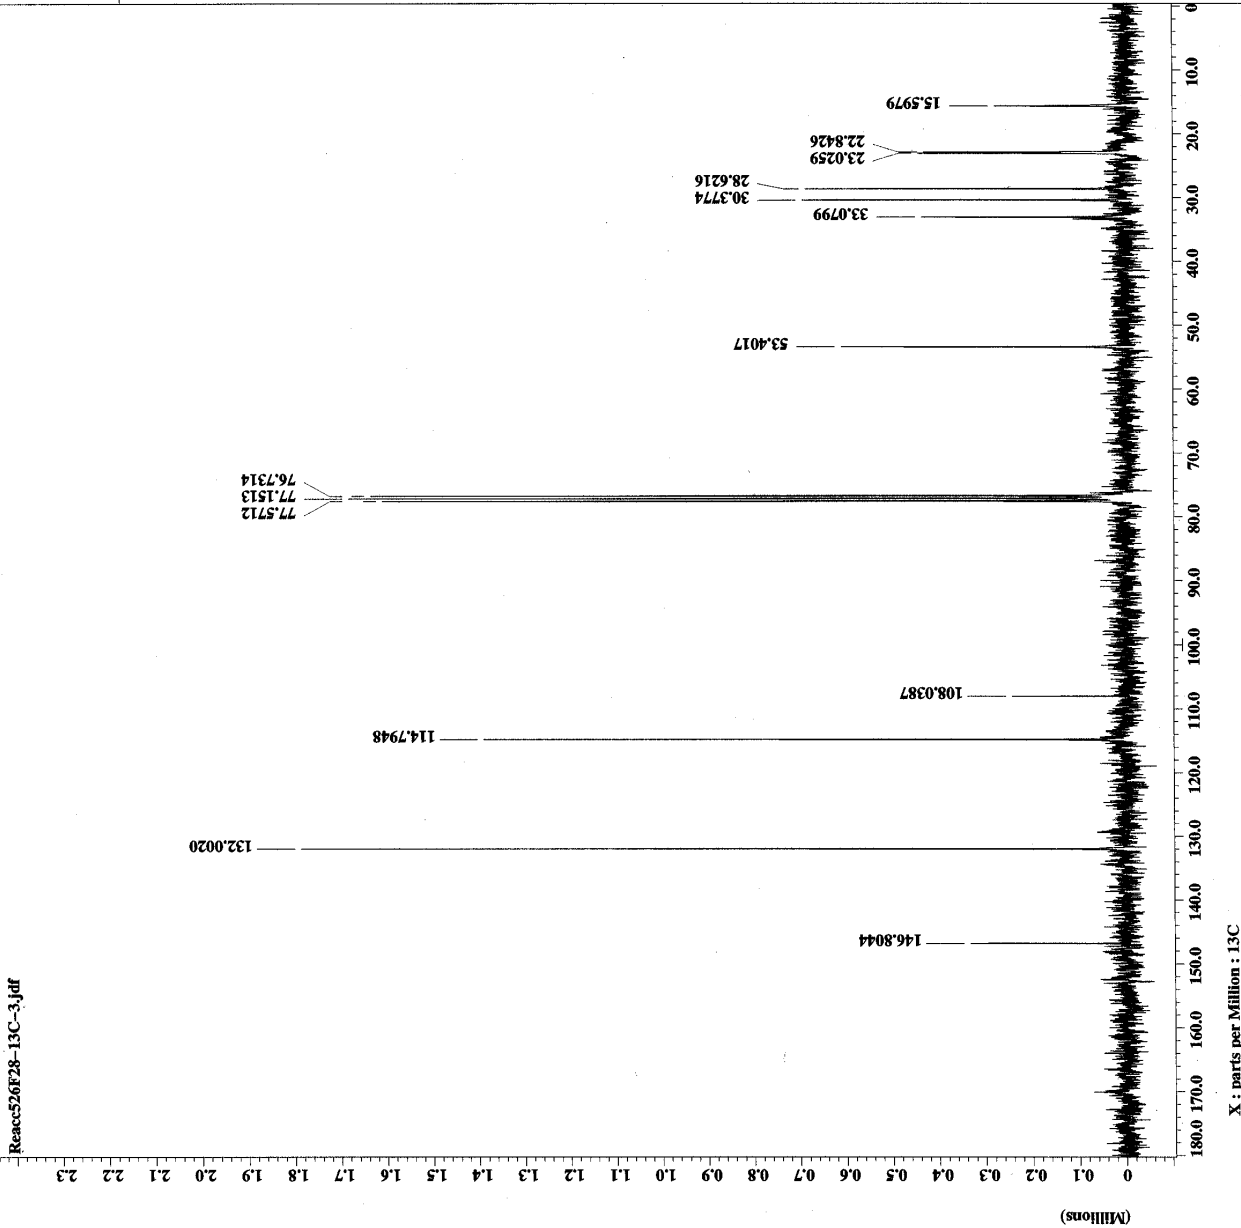

File: 1204-Reac526  
 Sample: Dr-Cabrera  
 Instrument: JEOL GCmate  
 Inlet: GC

Date Run: 05-27-2009 (Time Run: 14:07:47)

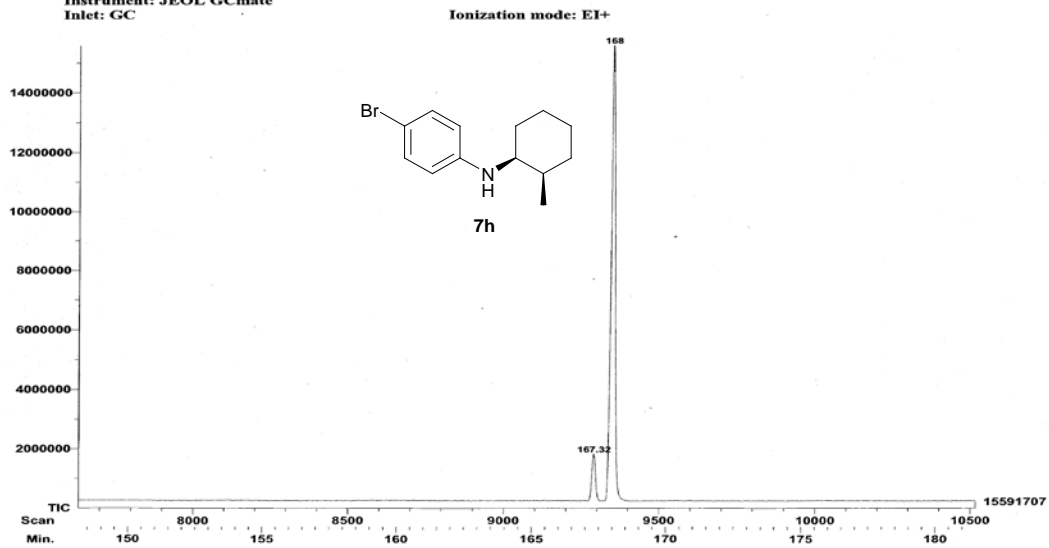

File: 1204-Reac526  
 Sample: Dr-Cabrera  
 Instrument: JEOL GCmate  
 Inlet: GC

Date Run: 05-27-2009 (Time Run: 14:07:47)

Scan: 9290 R.T.: 167.32  
 Base: m/z 212; 5.3%FS TIC: 1814032

#Ions: 41

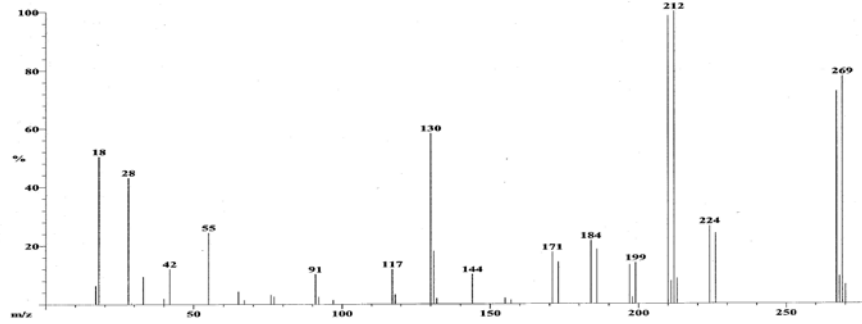

File: 1204-Reac526  
 Sample: Dr-Cabrera  
 Instrument: JEOL GCmate  
 Inlet: GC

Date Run: 05-27-2009 (Time Run: 14:07:47)

Scan: 9349 R.T.: 168  
 Base: m/z 210; 41%FS TIC: 15824944

#Ions: 103

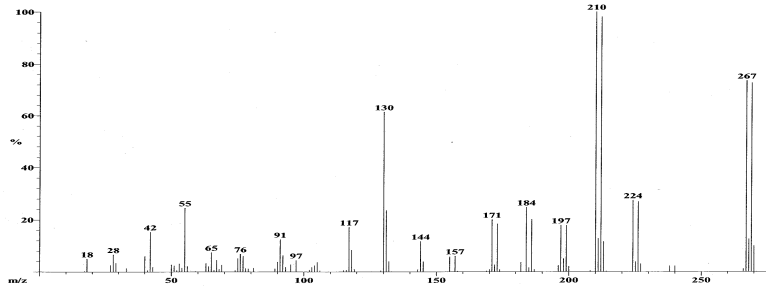

Peak Table

| Peak Label | RIC | Scan Range | Baseline at | Total Area | Background | Peak Area |
|------------|-----|------------|-------------|------------|------------|-----------|
| 157.17     | TIC | 8397-8423  | 8385-8389   | 3629883    | 3379220    | 250663    |
| 157.83     | TIC | 8455-8481  | 8490-8494   | 7812256    | 3305930    | 4506326   |



U.N.A.M. Instituto de Química ICH  
 Dr. A. Cabrera/Laura R. P  
 Clave:Reacc52F30  
 Disolvente:CDCl3  
 Experimento:IH  
 Varian Inova IH 500 MHz (G)  
 No. de registro 0834  
 20-05-09  
 Pulse Sequence: s2pu1

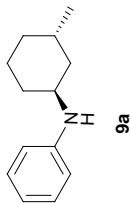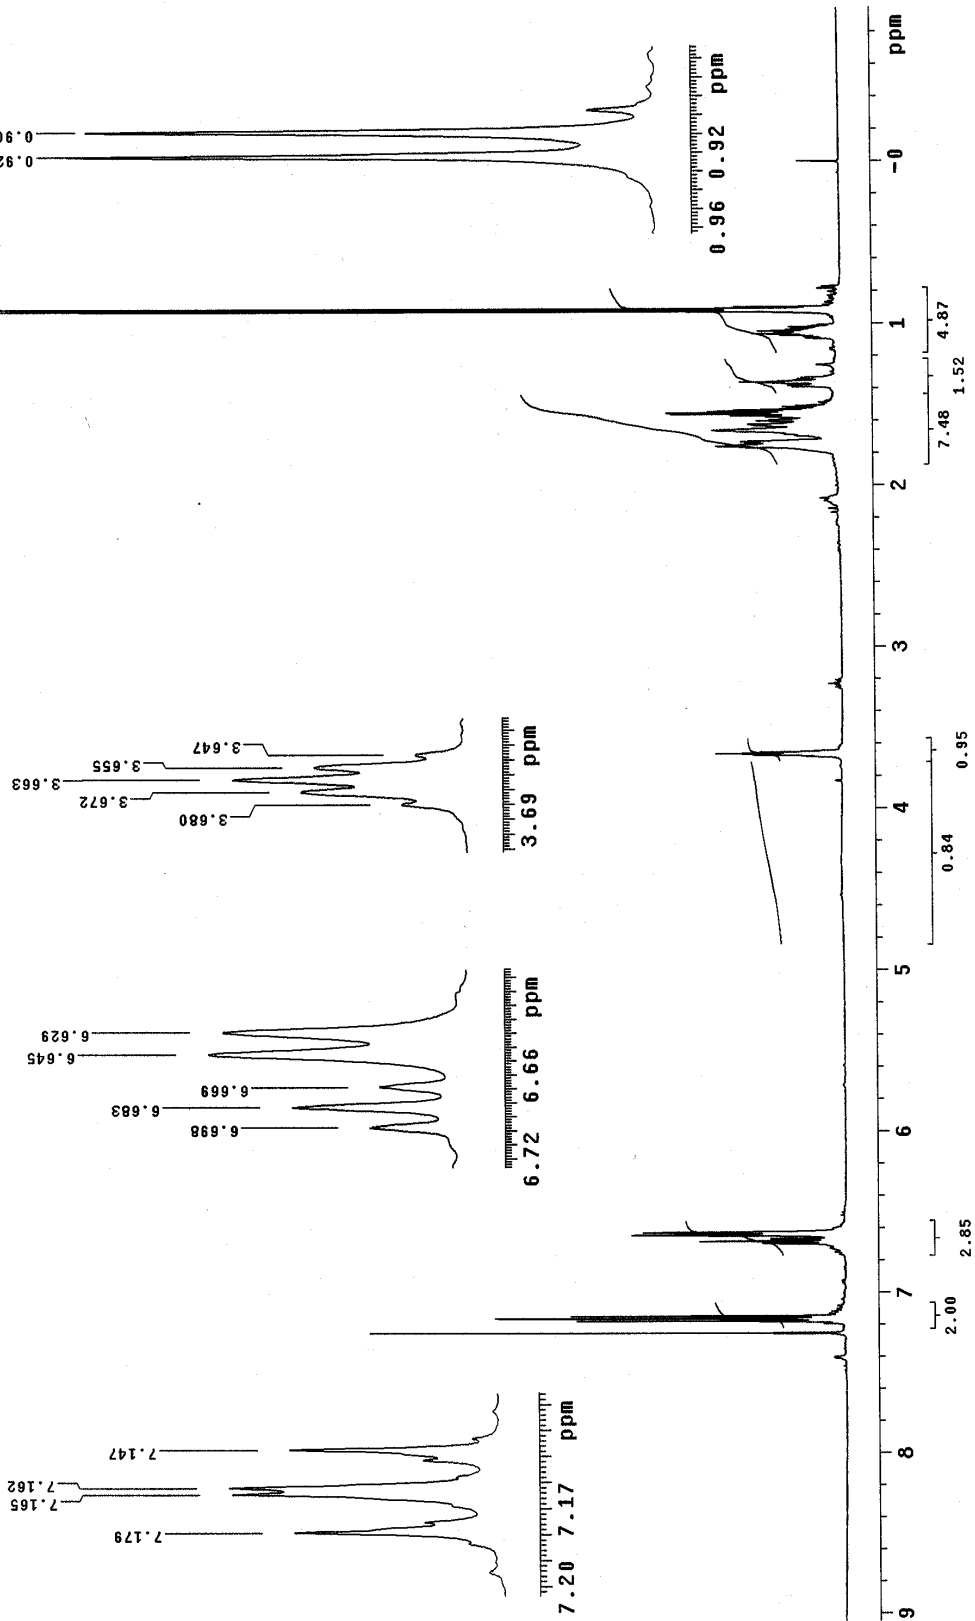

U.N.A.M. Instituto de Química ICH  
Dr. A. Cabera/Laura R. P.  
Clave: Peacc52f30  
Disolvente: CDCl3  
Experimento: 13C  
Varian Inova 125 MHz (G)  
No. de registro 0834  
20-03-09

File: Carbon

Pulse Sequence: s2pul

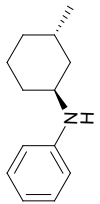

9a

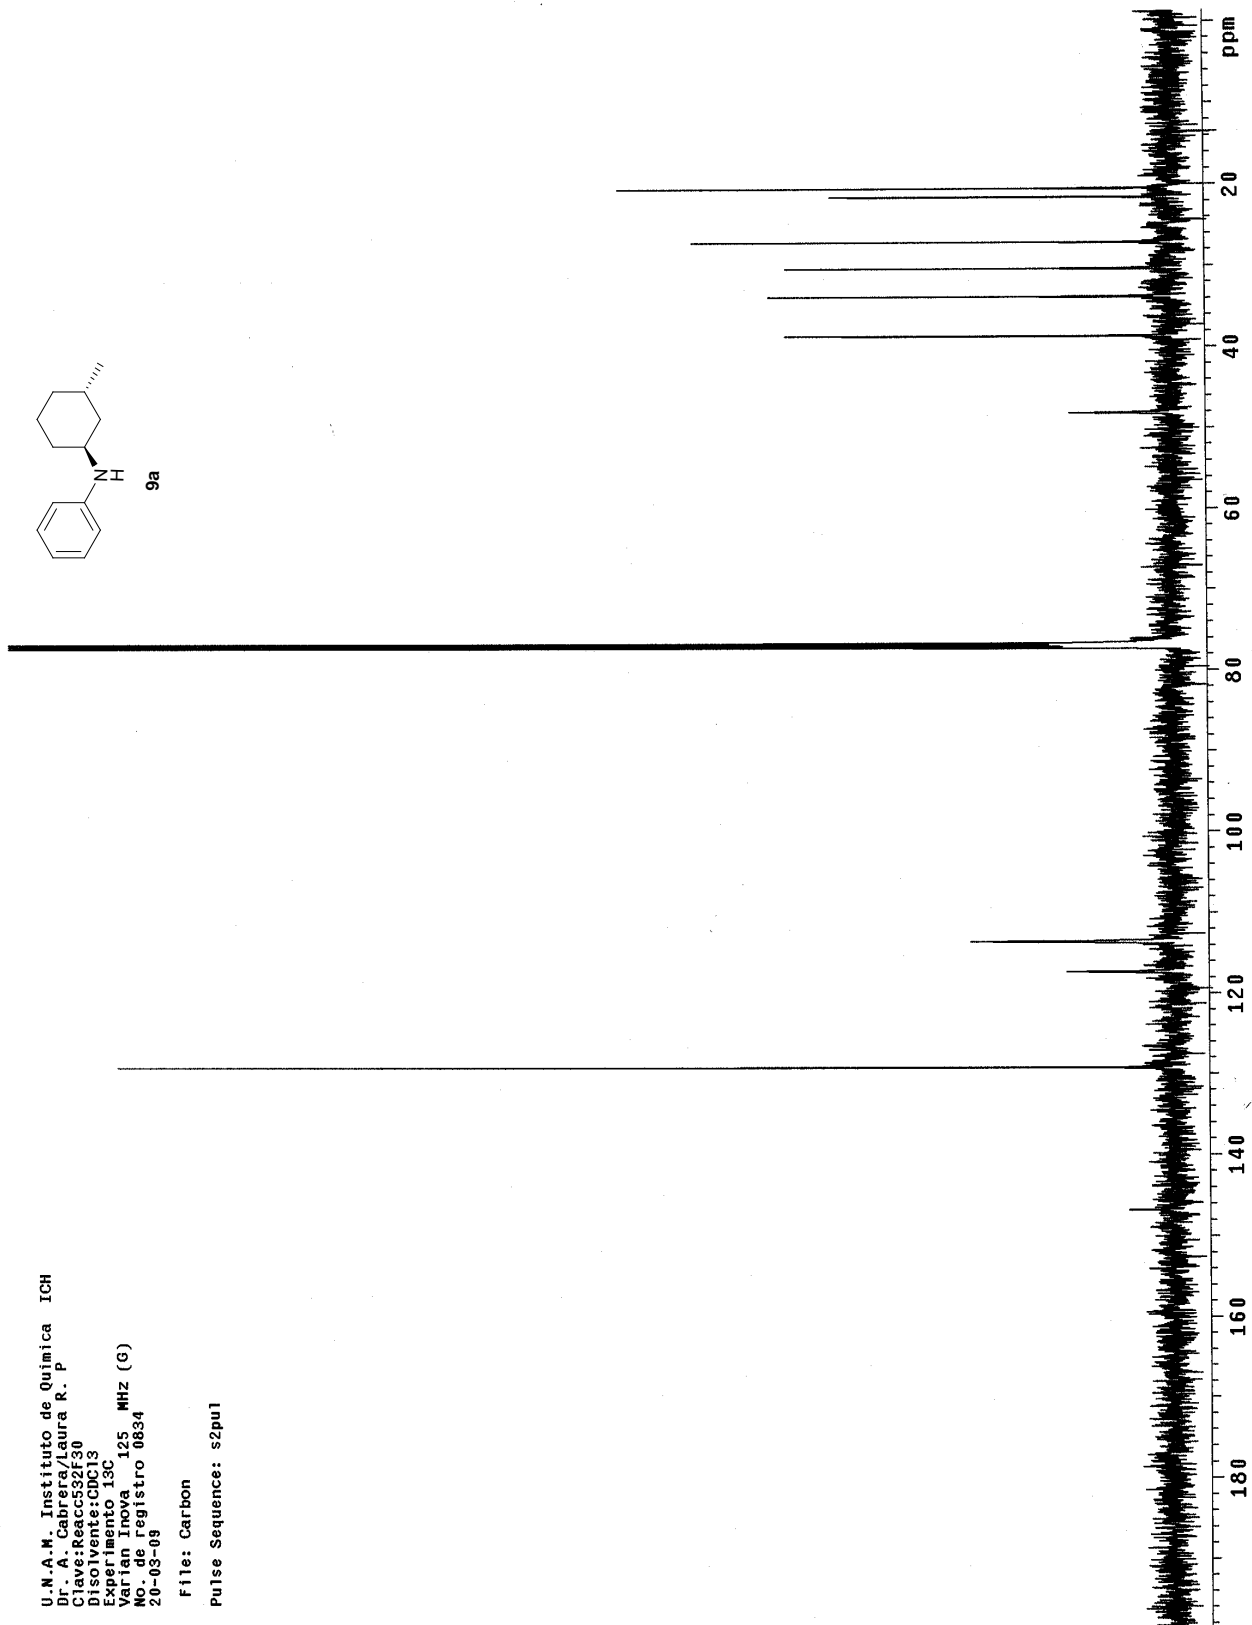

U.N.A.M. Instituto de Química ICH  
Dr. A. Cabreriz/Saura R. P  
Clave:Reacc552130  
Solvente:CDCl3  
Experimento:HSQC  
Variate:Proa 500 MHz (G)  
Número de Registro 0834  
20-03-09

Pulse Sequence: gHSQC

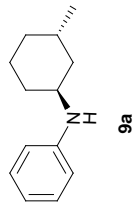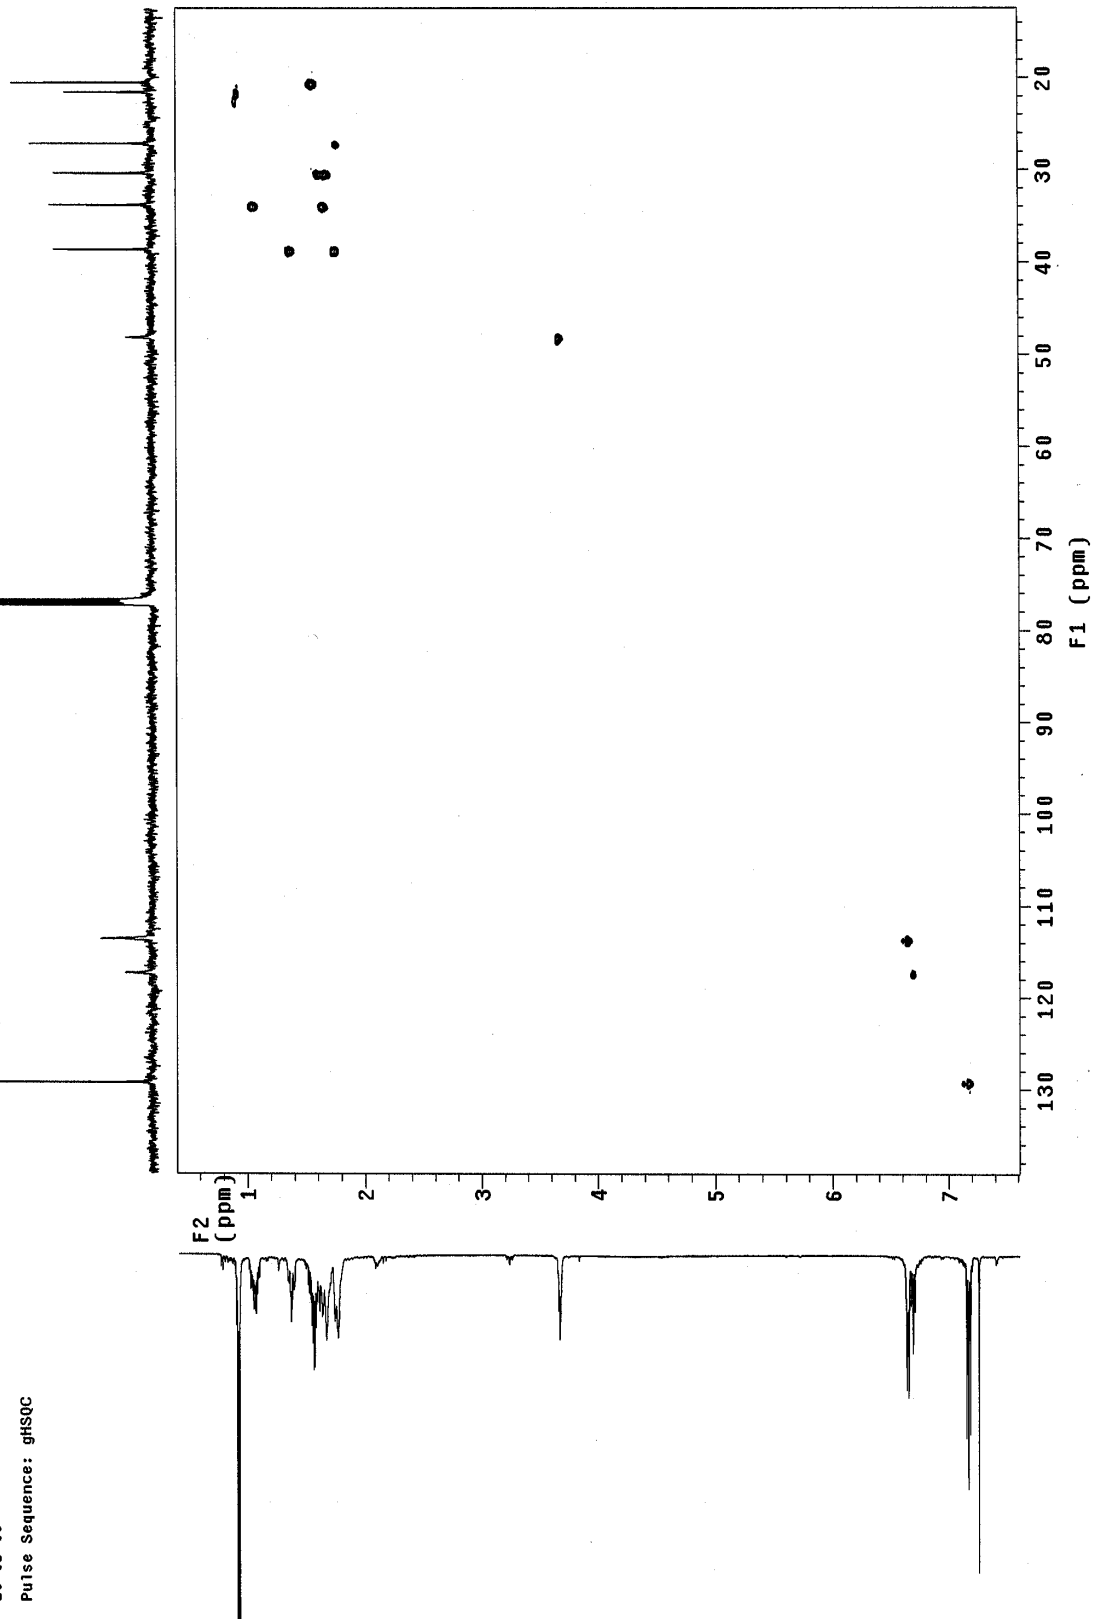

U.N.A.M. Instituto de Química ICH  
Dr. A. Cabrera/Laura R. P  
Clave:Reacc32f30  
Disolvente:CDCl3  
Experimento HSQC  
Marian Inoya\_500\_MHz (G)  
No. de Registro 0834  
20-05-03  
Pulse Sequence: gHSQC

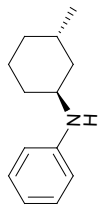

HSQC-Expansions

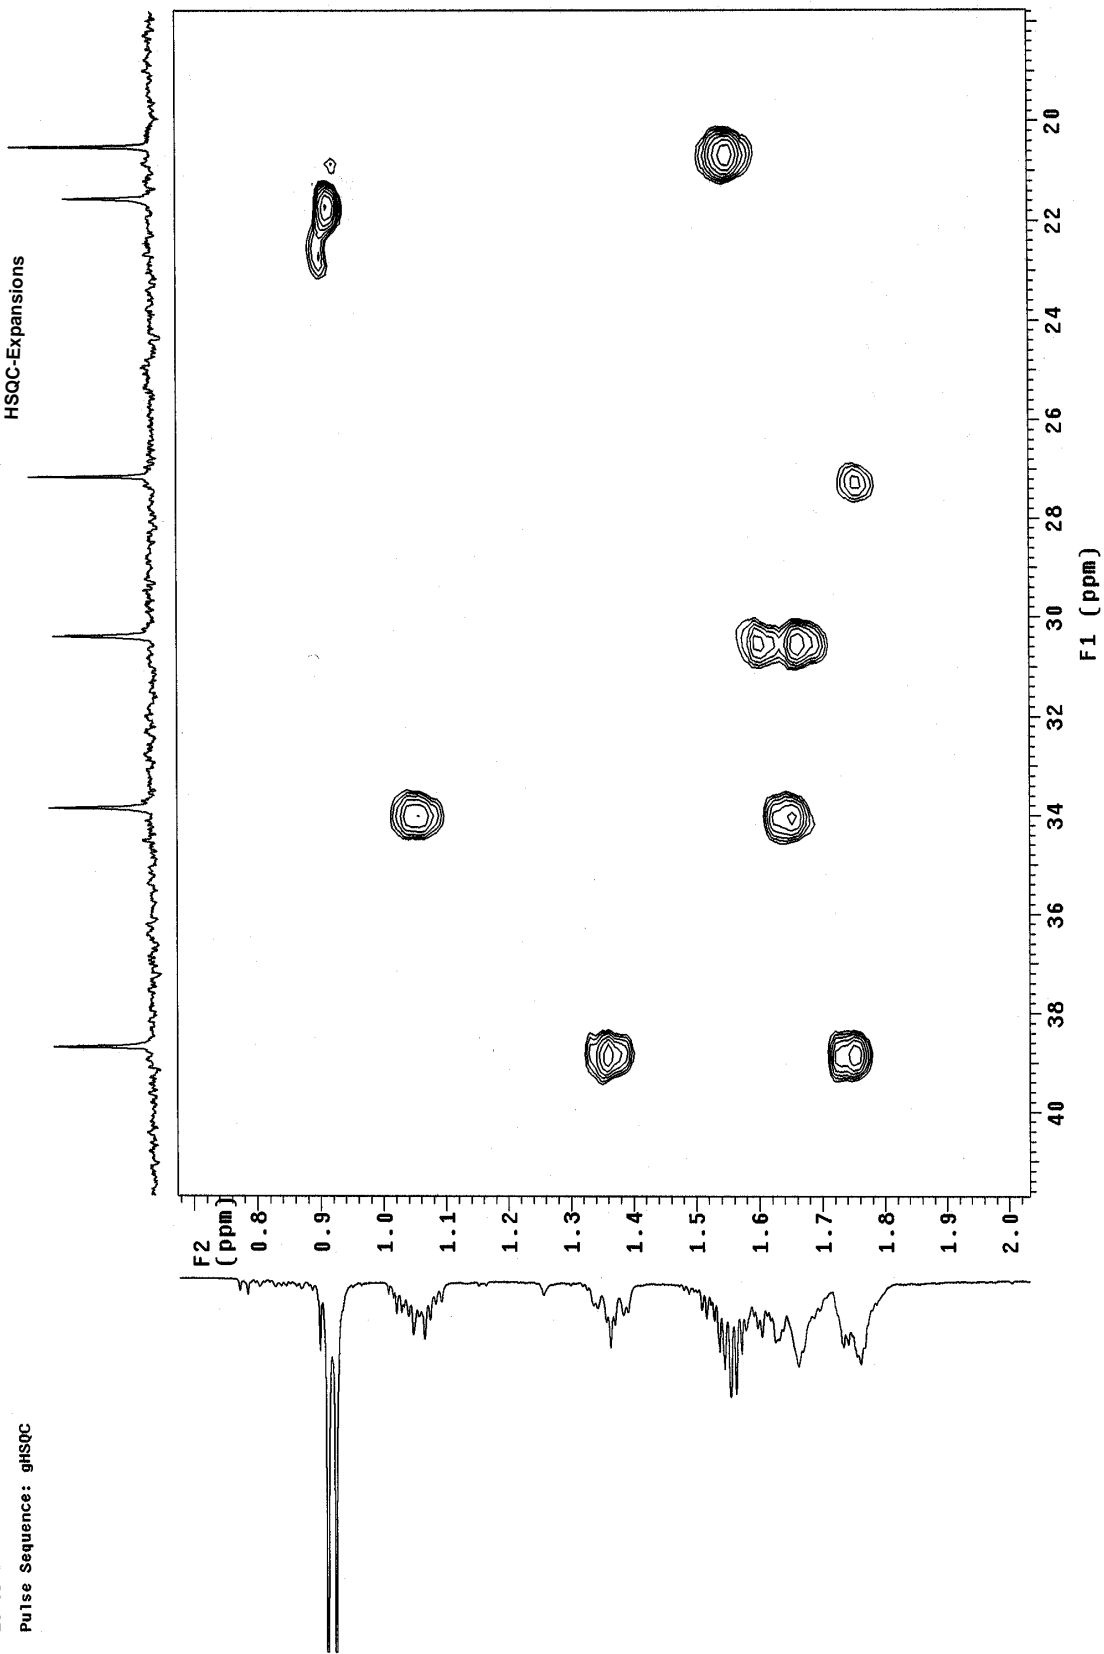

U.N.A.M. Instituto de Quimica ICH  
Dr. A. Cabrerizo/Laura R. P  
Clave: Reacc52/20  
Disolvente: CDCl3  
Experimento: NMR15  
Varian Proya 500 MHz (G)  
No. de registro 0834  
20-03-09

Pulse Sequence: noesy

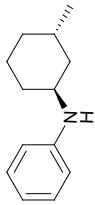

9a

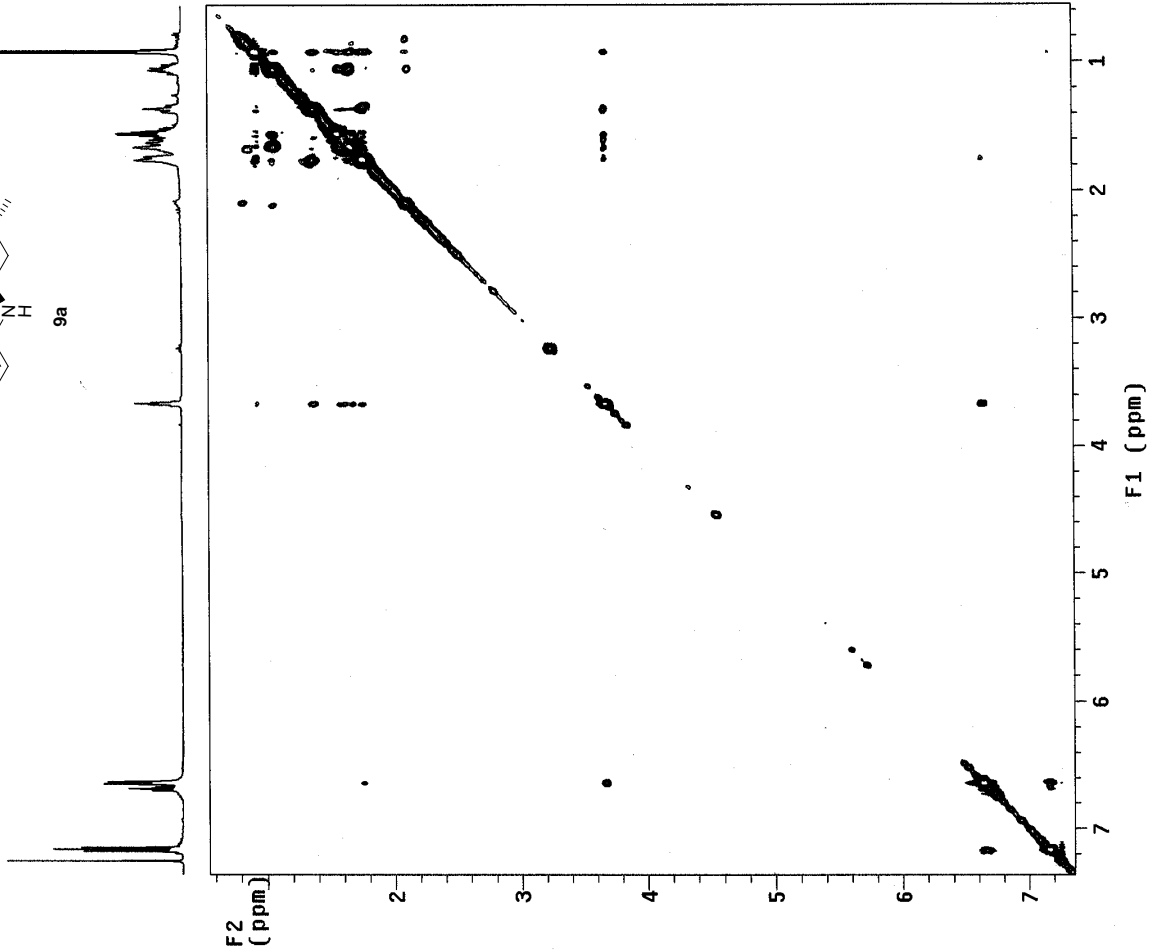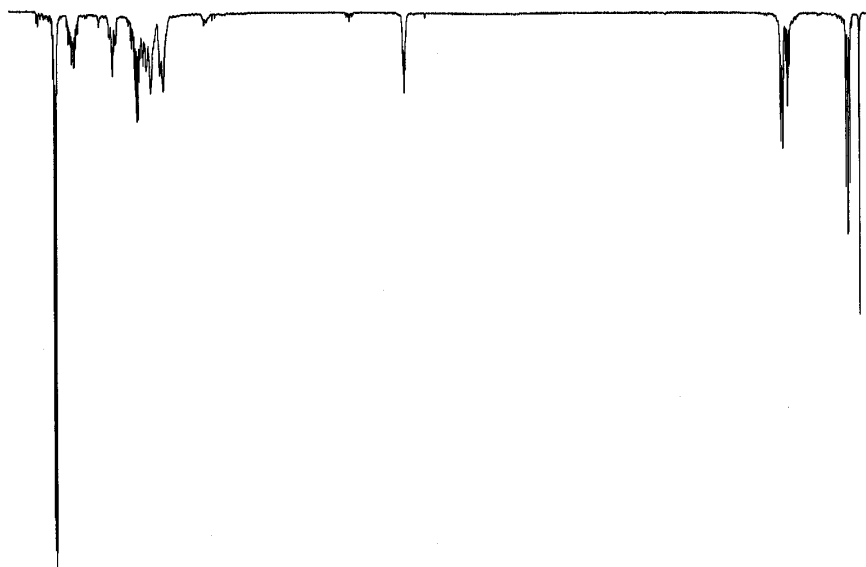

U.N.A.M. Instituto de Química ICH  
Dr. A. Cabrera/Laura R. P  
Clave:Reacc52F30  
Disolvente:CDCl3  
Experimento NOESY  
Varian Inova 500 MHz (G)  
No. de registro 0834  
20-03-09

Pulse Sequence: noesy

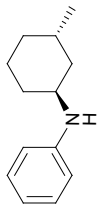

9a

NOESY-Expansions

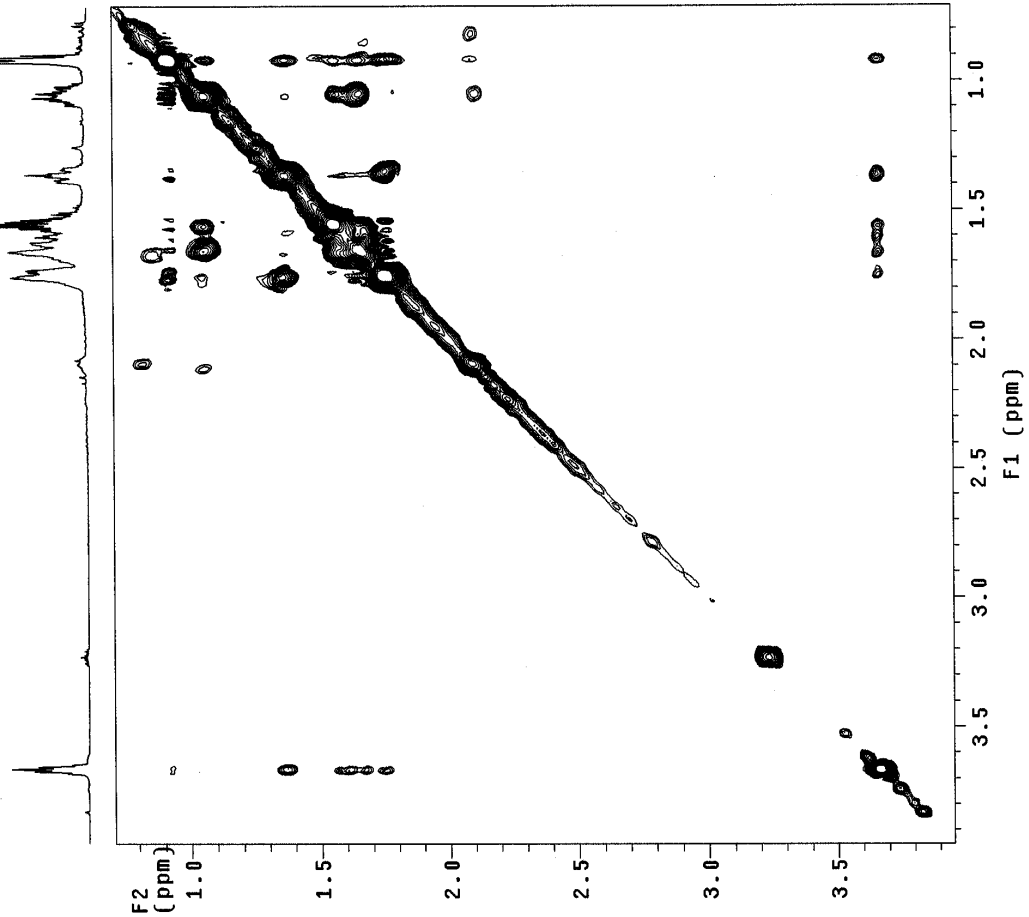

File: REACC 532  
 Sample: Dr-Cabrera  
 Instrument: JEOL GCmate  
 Inlet: GC

Date Run: 05-26-2009 (Time Run: 13:24:55)

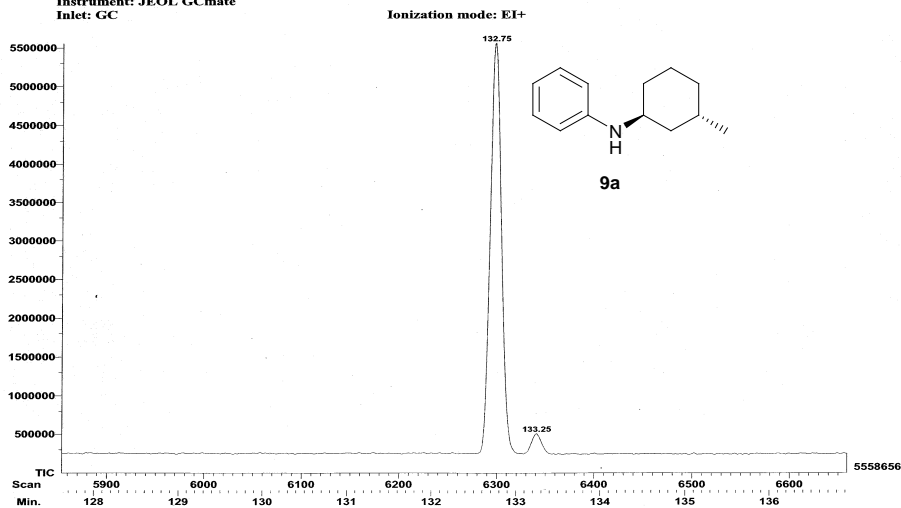

File: REACC 532  
 Sample: Dr-Cabrera  
 Instrument: JEOL GCmate  
 Inlet: GC

Date Run: 05-26-2009 (Time Run: 13:24:55)

Scan: 6298 R.T.: 132.75  
 Base: m/z 146; 25%FS TIC: 5622400

#Ions: 48

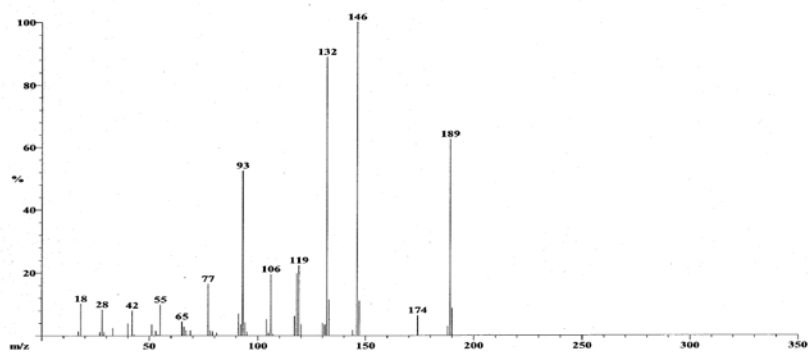

File: REACC 532  
 Sample: Dr-Cabrera  
 Instrument: JEOL GCmate  
 Inlet: GC

Date Run: 05-26-2009 (Time Run: 13:24:55)

Scan: 6341 R.T.: 133.25  
 Base: m/z 18; 2.7%FS TIC: 496576

#Ions: 12

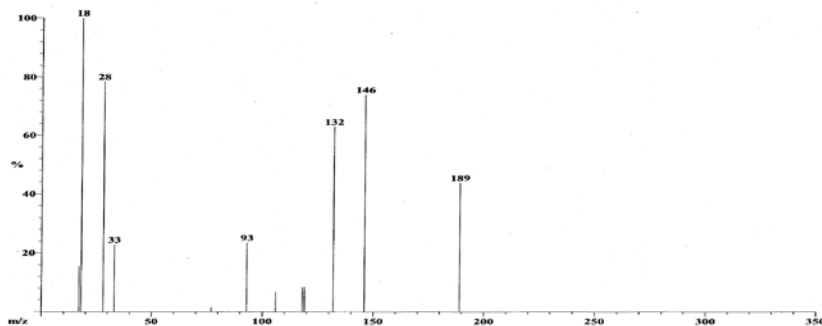

Peak Table

| Peak Label | RIC | Scan Range | Baseline at | Total Area | Background | Peak Area |
|------------|-----|------------|-------------|------------|------------|-----------|
| 132.75     | TIC | 6286-6310  | 6274-6278   | 51692778   | 4175630    | 47517148  |
| 133.25     | TIC | 6329-6353  | 6360-6364   | 6197332    | 4020182    | 2177150   |

UNAM, Instituto de Quimica. (H. Rios)  
 Dr-A-Cabrera/L-537F27  
 Clave: seacc-86  
 No. Registro: 86  
 Experimento: Hidrogeno  
 Disolvente: CDCl3  
 Variacion: 500MHZ (G)  
 Marzo-25-2008

File: std1h

Pulse Sequence: s2pu1

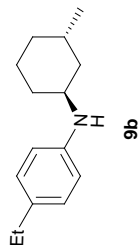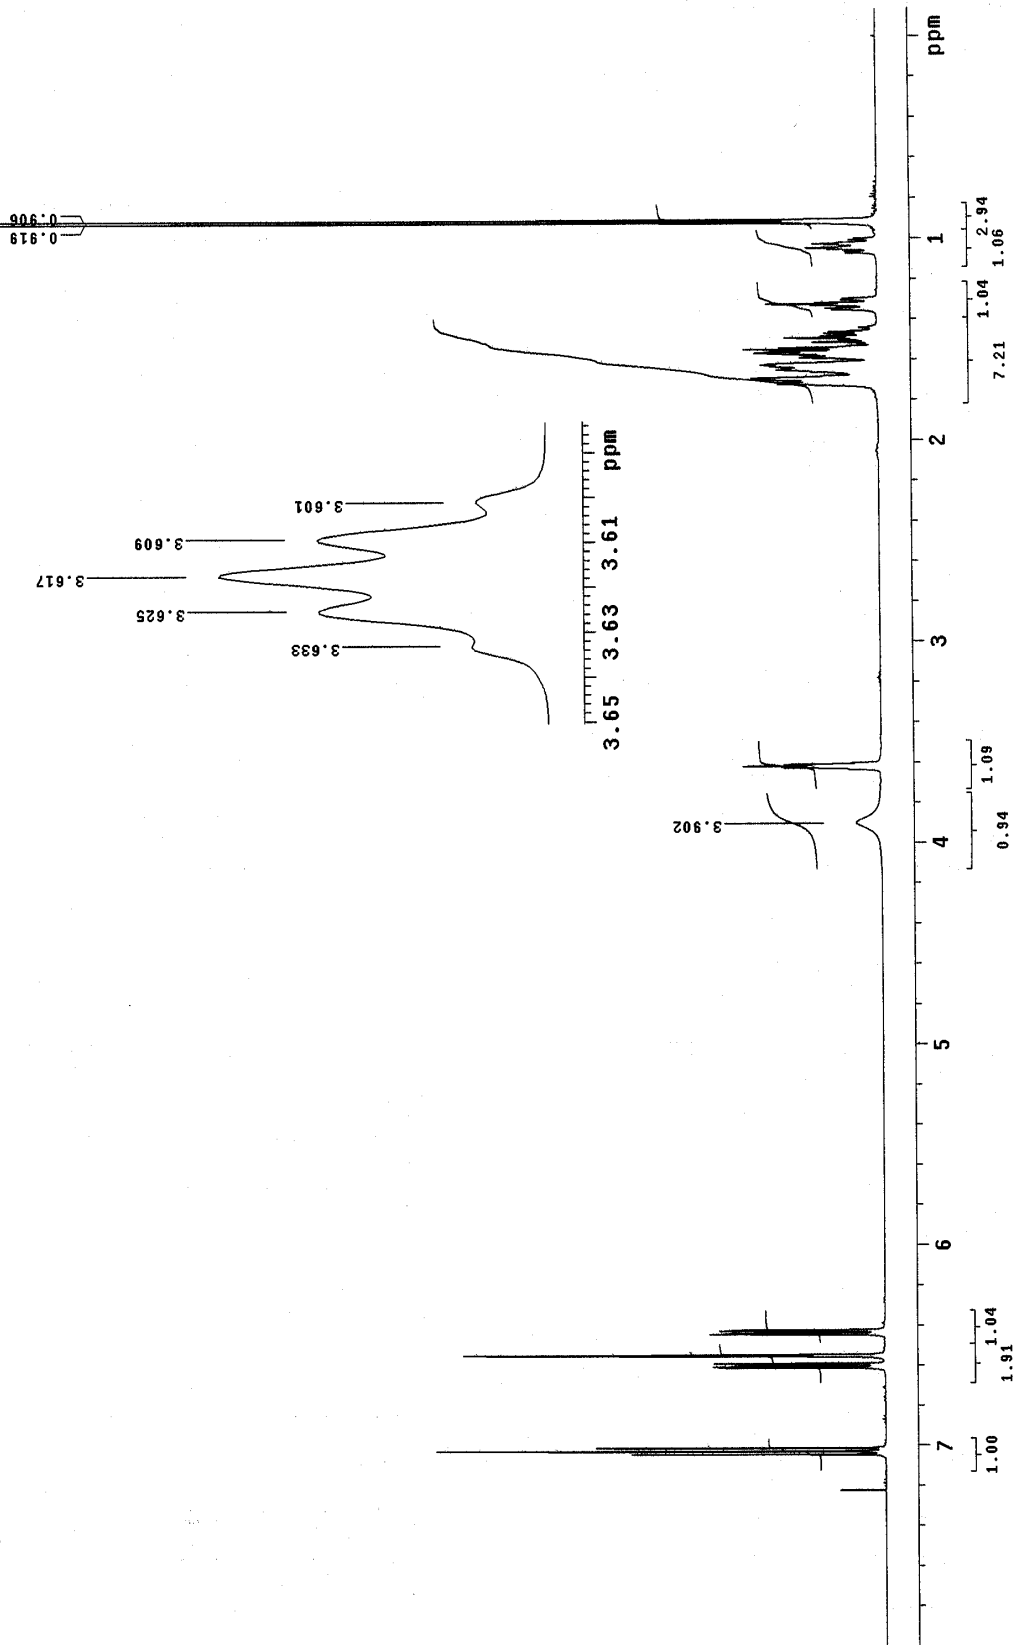



U.N.A.M. Instituto de Química ICH  
Dr. A. Cabrera/Laura RP  
Clave : Reacc 538F2627  
Disolvente: CDCl3  
Experimento : 13C  
Varian Inova 125 MHz  
No. de Registro 1039  
23-04-09

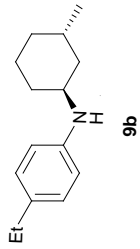

File: Carbon  
Pulse Sequence: s2pul

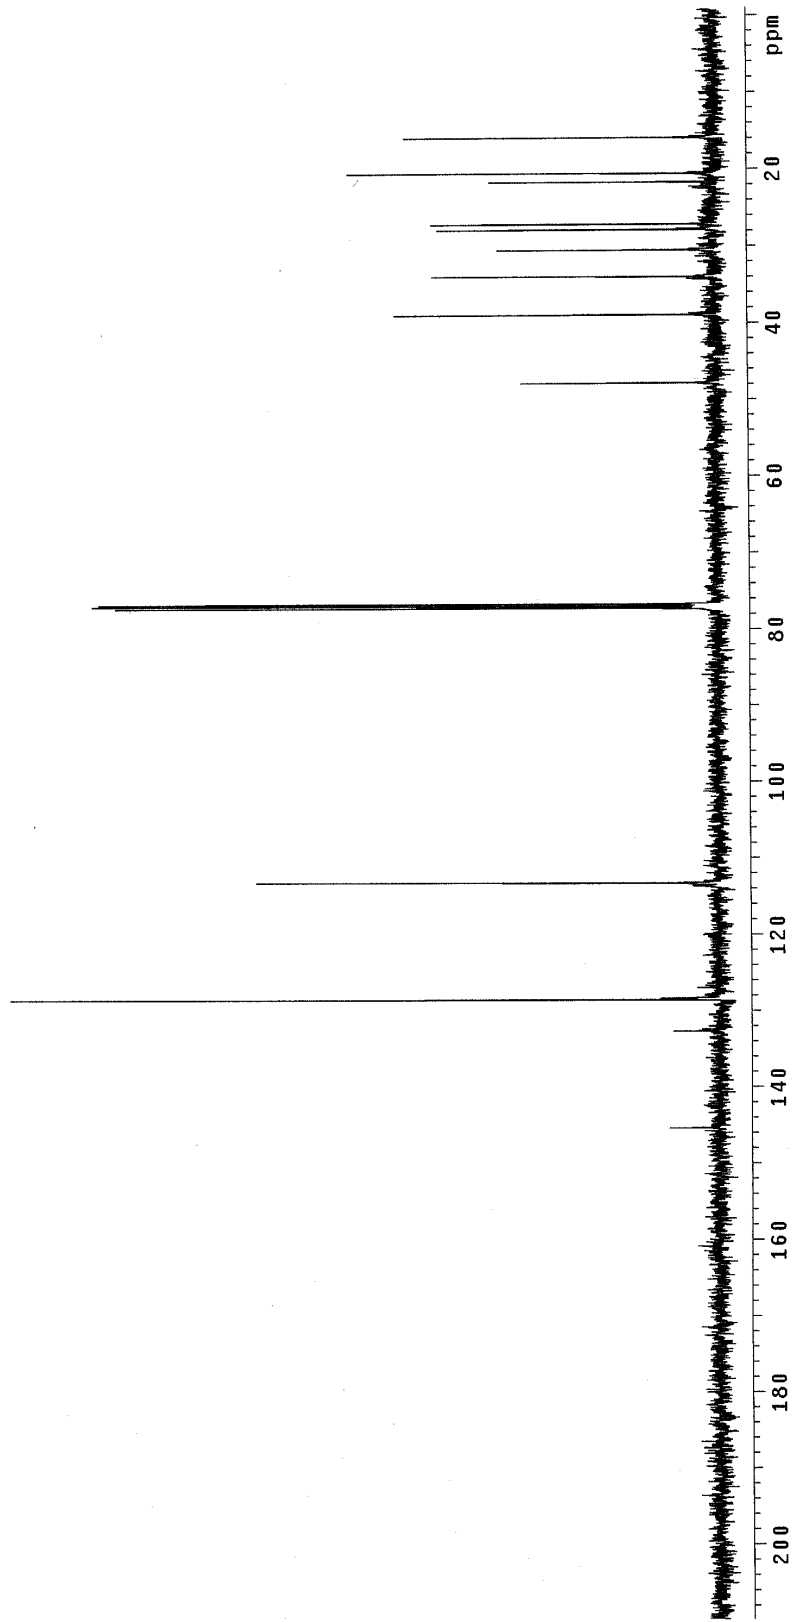

File: 1039-REACC538F  
 Sample: Dr-Cabrera  
 Instrument: JEOL GCmate  
 Inlet: GC

Date Run: 05-25-2009 (Time Run: 12:20:07)

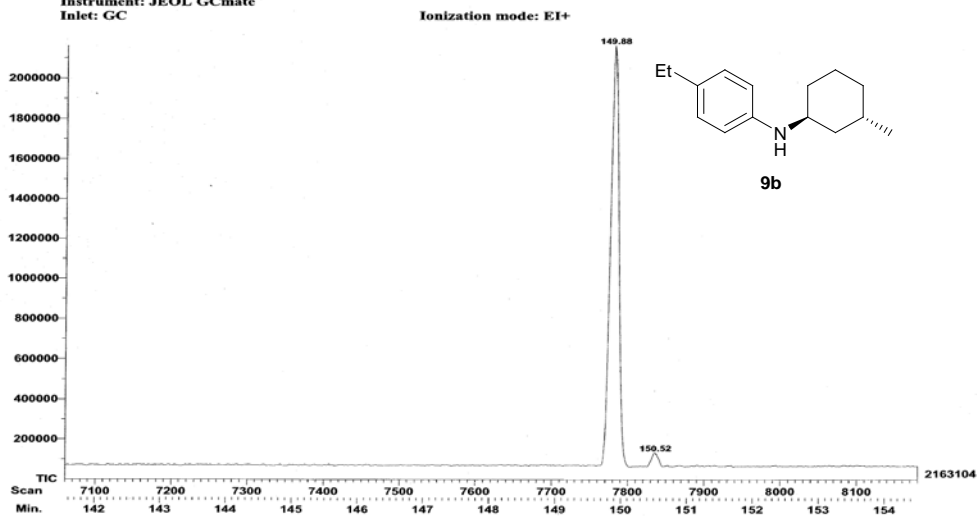

File: 1039-REACC538F  
 Sample: Dr-Cabrera  
 Instrument: JEOL GCmate  
 Inlet: GC

Date Run: 05-25-2009 (Time Run: 12:20:07)

Scan: 7780 R.T.: 149.88  
 Base: m/z 174; 9.8%FS TIC: 2192880

#Ions: 3

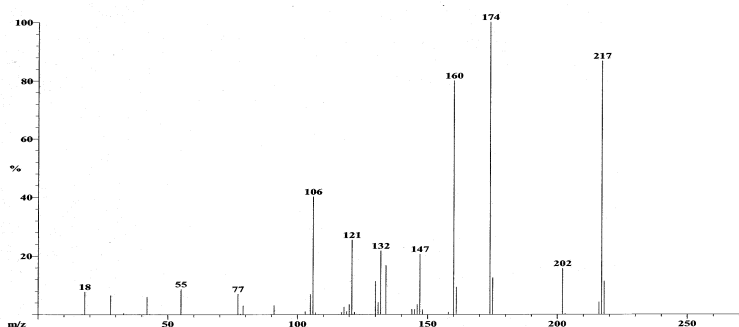

File: 1039-REACC538F  
 Sample: Dr-Cabrera  
 Instrument: JEOL GCmate  
 Inlet: GC

Date Run: 05-25-2009 (Time Run: 12:20:07)

Scan: 7836 R.T.: 150.52  
 Base: m/z 18; .9%FS TIC: 135792

#Ions: 7

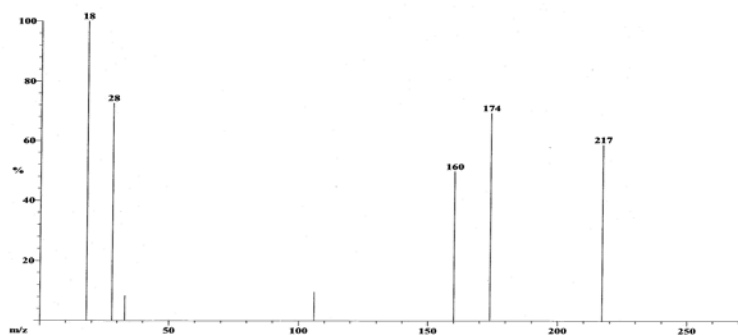

Peak Table

| Peak Label | RIC | Scan Range | Baseline at | Total Area | Background | Peak Area |
|------------|-----|------------|-------------|------------|------------|-----------|
| 149.88     | TIC | 7768-7792  | 7801-7805   | 19318740   | 1071222    | 18247518  |
| 150.52     | TIC | 7824-7848  | 7856-7860   | 1571026    | 1086492    | 484534    |

UNAM. Instituto de Quimica. (H. Rios)  
Dr-A-cabrera/Laura-R.P  
Clave: Reacc55F2526  
No. Registro: 906  
Experimento: Hidrogeno  
Disolvente: CDCl3  
VarianInova-500MHz (G)  
Marzo-25-2009

File: std1h

Pulse Sequence: s2pul

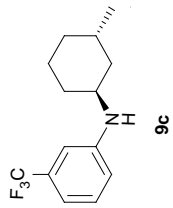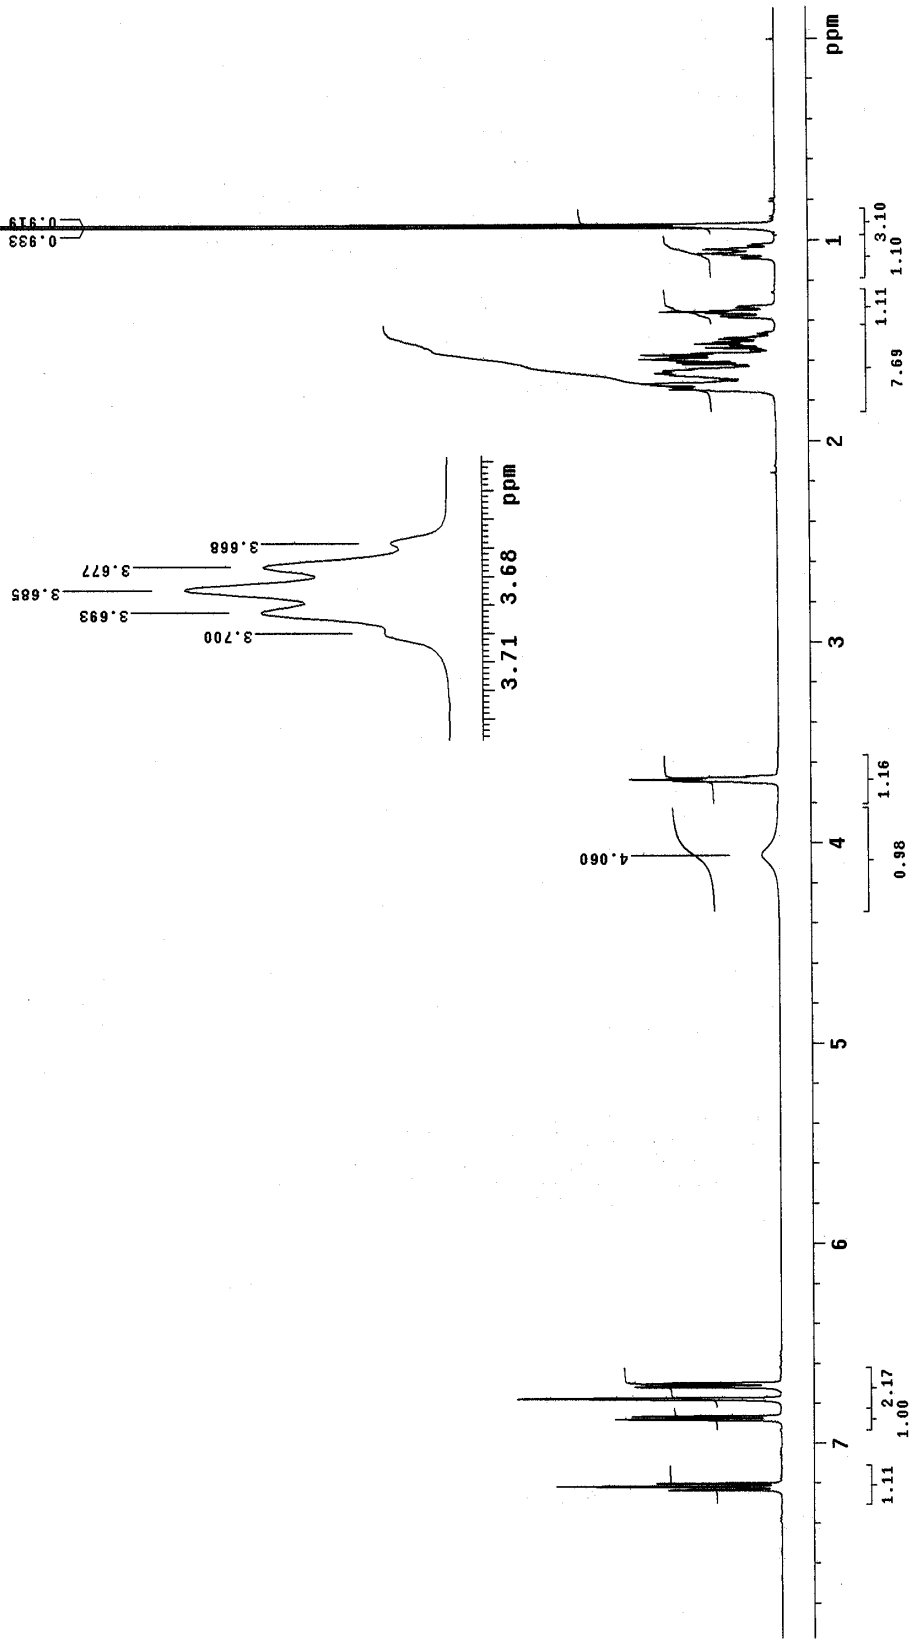

UNAM, Instituto de Química (H. Ríos)  
Dr-A-Cabrera/Laura-R.P  
Clave: Reacc535F2526  
No. registro: 906  
Expirante: C13  
Disolvente: CDCl3  
UnityInova-125.71MHz (G)  
Marzo-26-2009

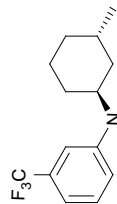

File: Carbon

Pulse Sequence: s2pul

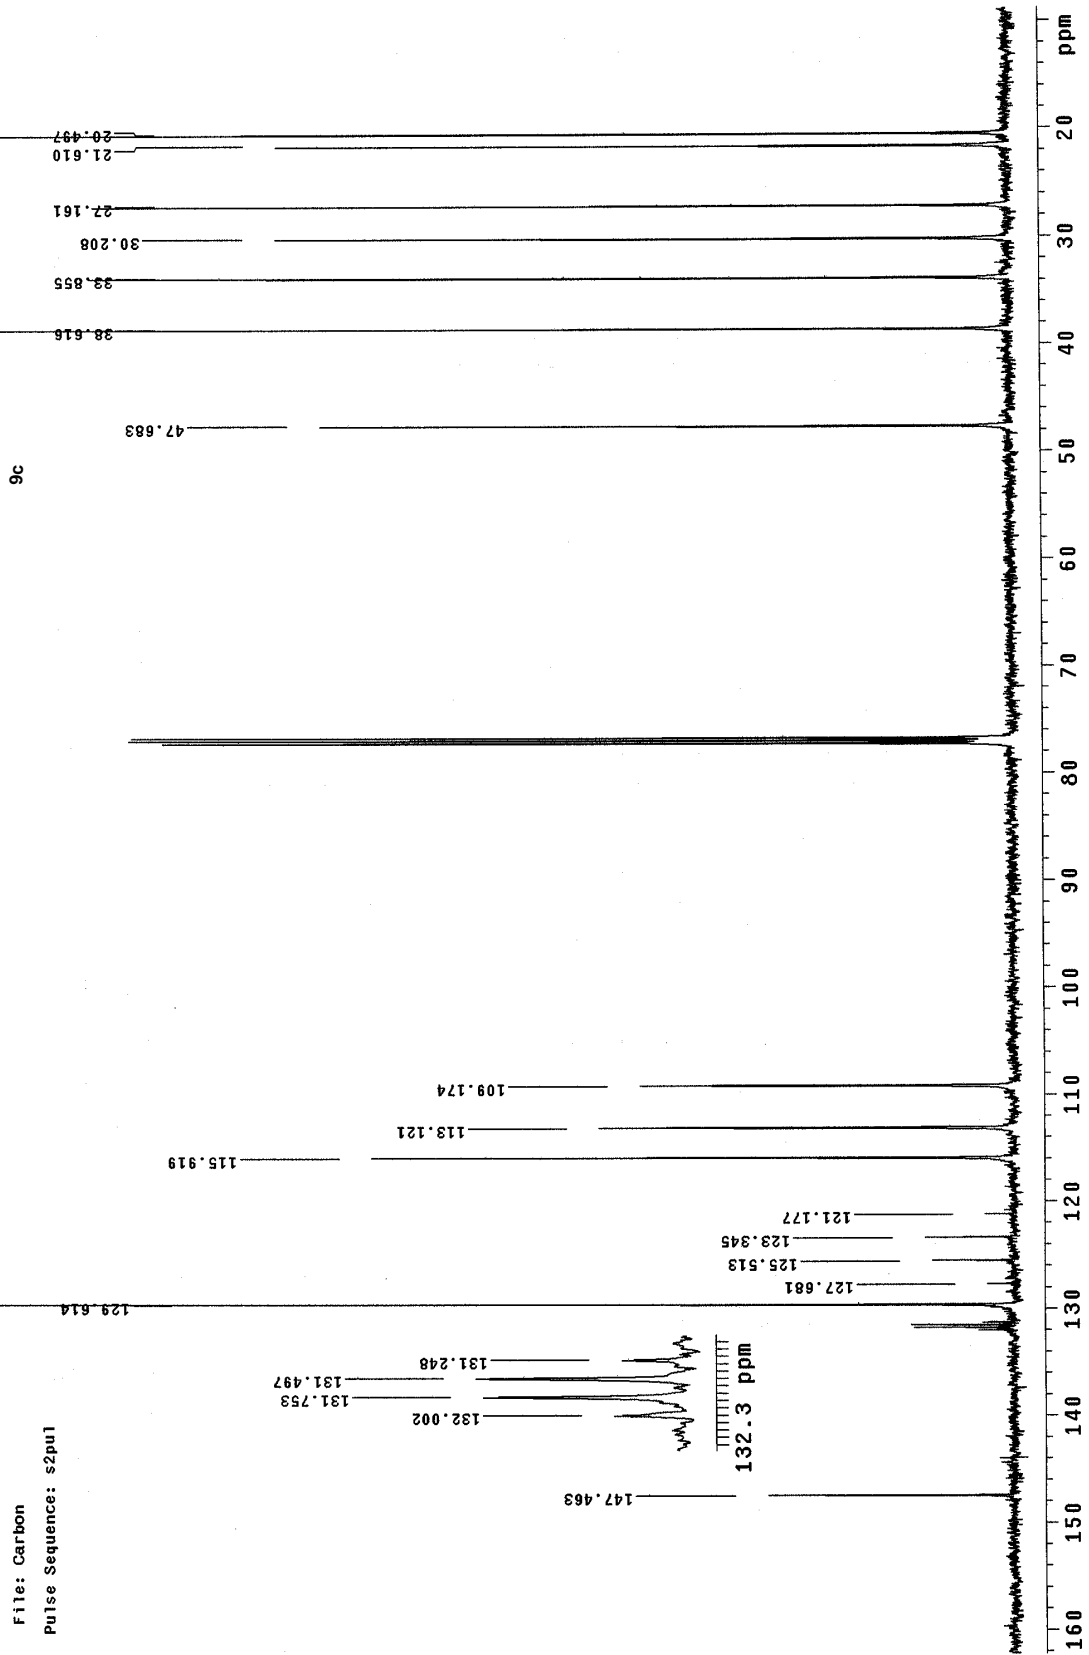

File: 1183-reac-535  
 Sample: Dr-Cabrera  
 Instrument: JEOL GCmate  
 Inlet: GC

Date Run: 05-25-2009 (Time Run: 19:05:23)

Ionization mode: EI+

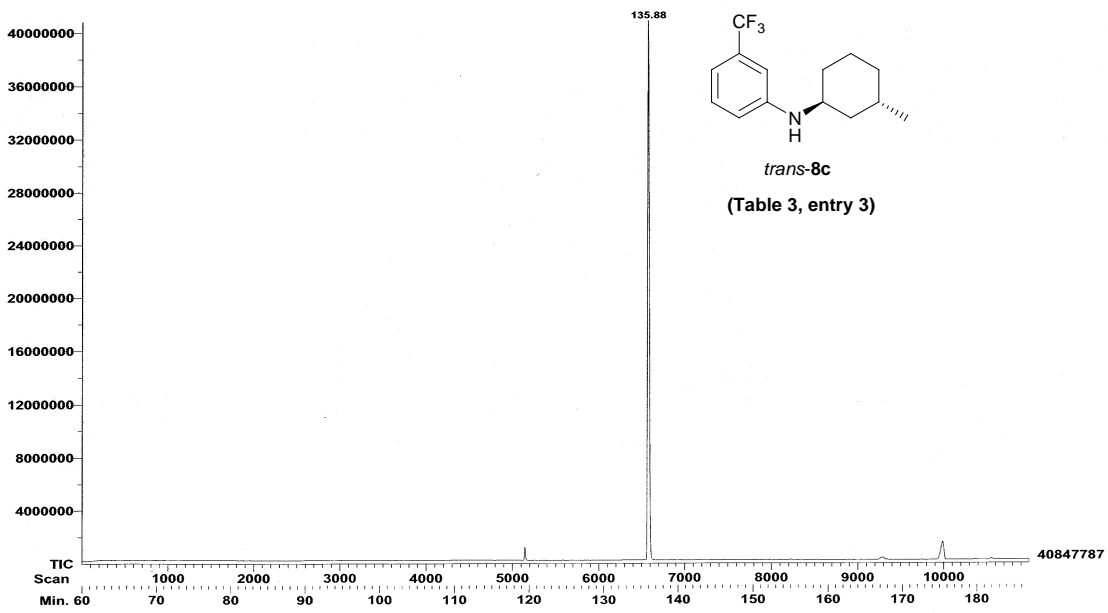

File: 1183-reac-535  
 Sample: Dr-Cabrera  
 Instrument: JEOL GCmate  
 Inlet: GC

Date Run: 05-25-2009 (Time Run: 19:05:23)

Ionization mode: EI+

Scan: 6569 R.T.: 135.88  
 Base: m/z 214; 99.6%FS TIC: 40759472

#Ions: 163

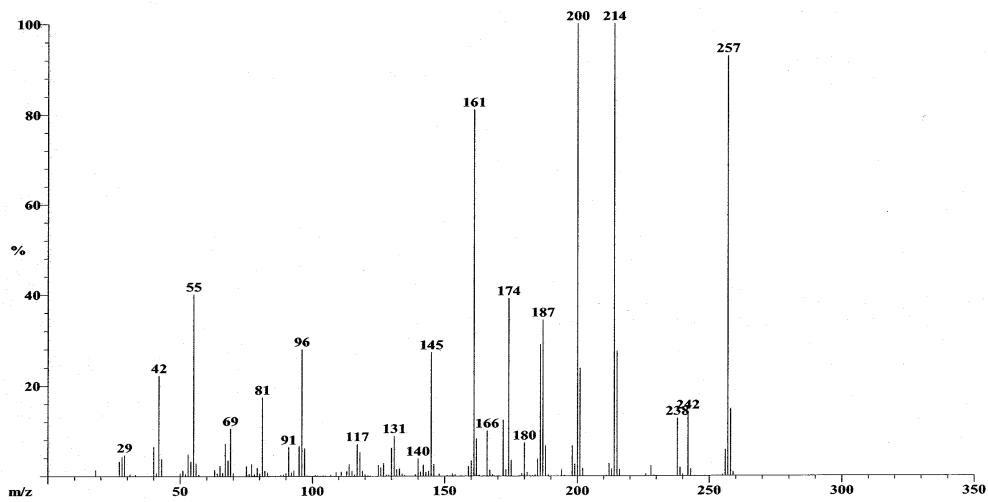

Peak Table

| Peak Label | RIC | Scan Range | Baseline at | Total Area | Background | Peak Area |
|------------|-----|------------|-------------|------------|------------|-----------|
| 135.88     | TIC | 6557-6581  | 6547-6551   | 478247767  | 4150451    | 474097316 |

UNAM, Instituto de Quimica. (H. Rios)  
Dr-A-Cabrera/LC97F27  
Citeve: Itacc-597F27  
Co. Registro: 866  
Experiments: Hidrogeno  
Disolvente: CDCl3  
Varianova-500MHZ (G)  
Marzo-25-2008

File: stdih

Pulse Sequence: s2pu1

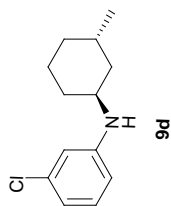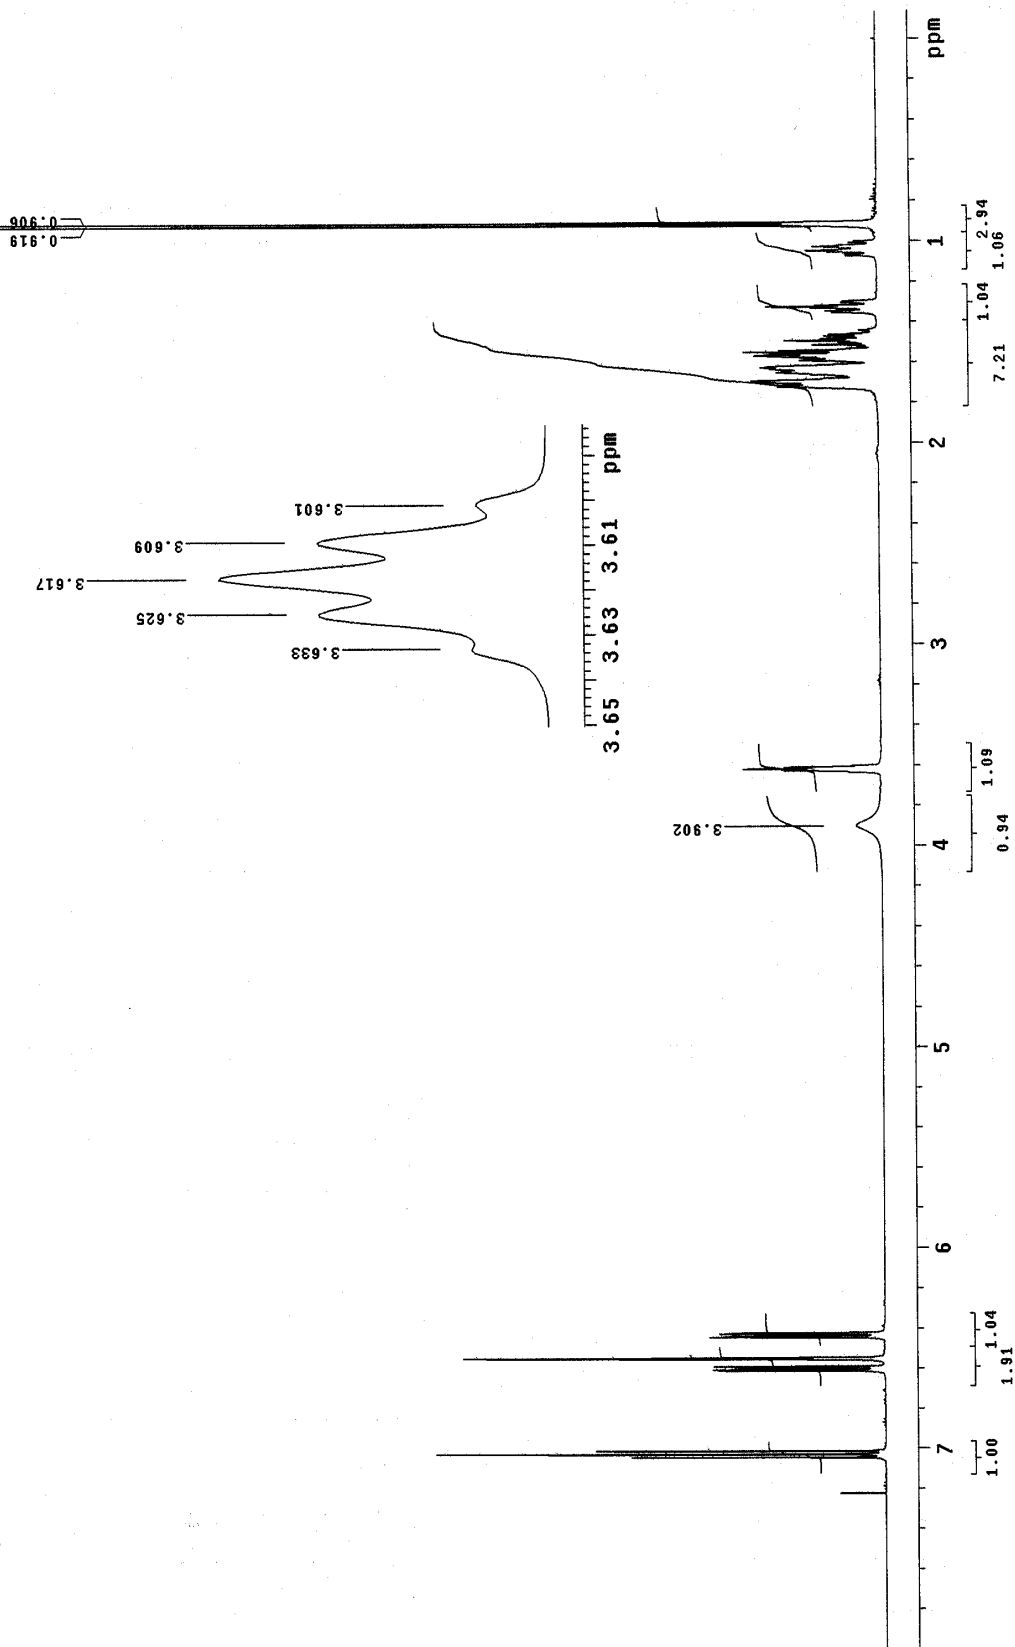

UNAM - Instituto de Quimica (H. Rios)  
Dr-A-Cabrera/Laura-R.P  
Clave: Reacc53727  
No. registro: 866  
Experimento: C13  
Disolvente: CDCl3  
UnityInova-125.71MHz (G)  
Marzo-25-2009

File: Carbon  
Pulse Sequence: s2pu1

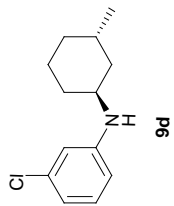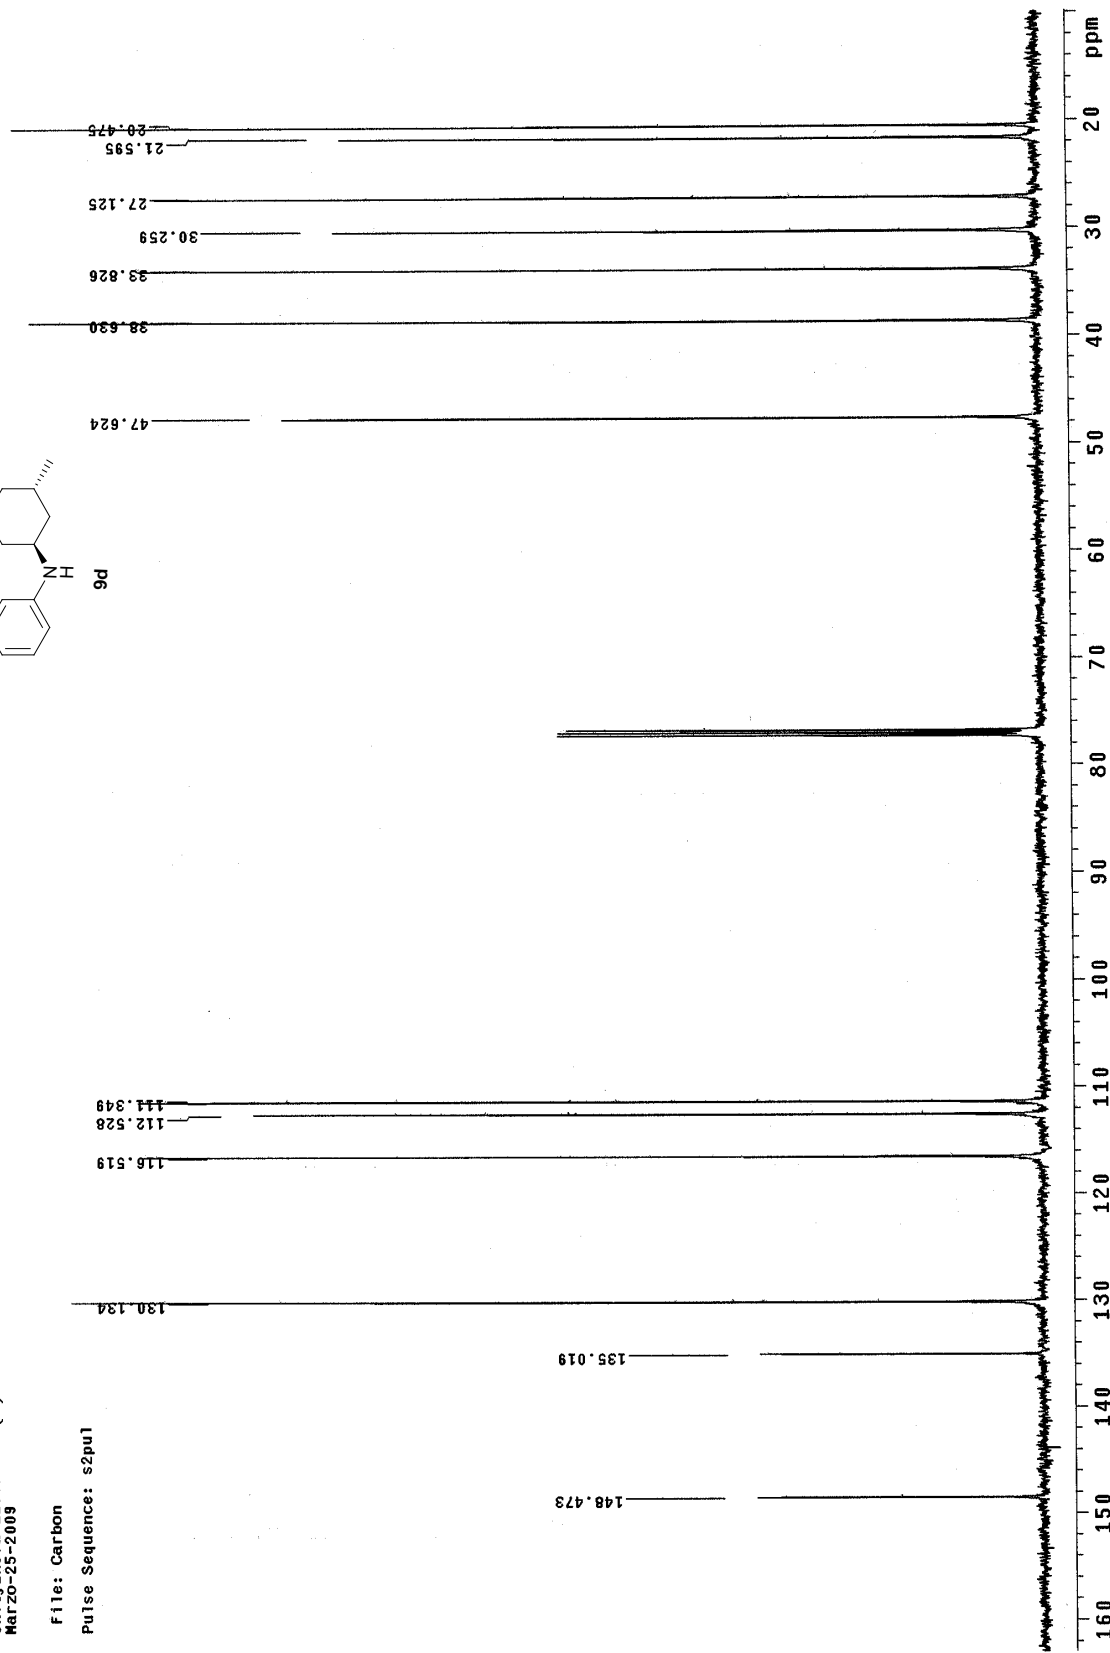

File: REACC-537  
Sample: Dr-Cabrera  
Instrument: JEOL GCmate  
Inlet: GC

Date Run: 05-26-2009 (Time Run: 09:02:42)

Ionization mode: EI+

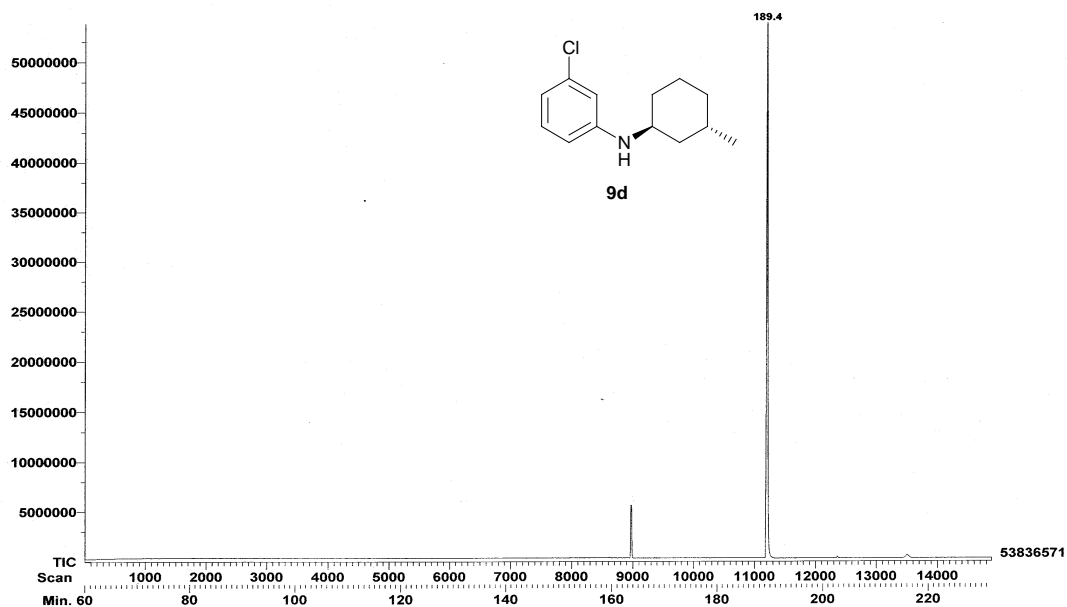

File: REACC-537  
Sample: Dr-Cabrera  
Instrument: JEOL GCmate  
Inlet: GC

Date Run: 05-26-2009 (Time Run: 09:02:42)

Ionization mode: EI+

Scan: 11201 R.T.: 189.4  
Base: m/z 223; 99.6%FS TIC: 53914192

#Ions: 153

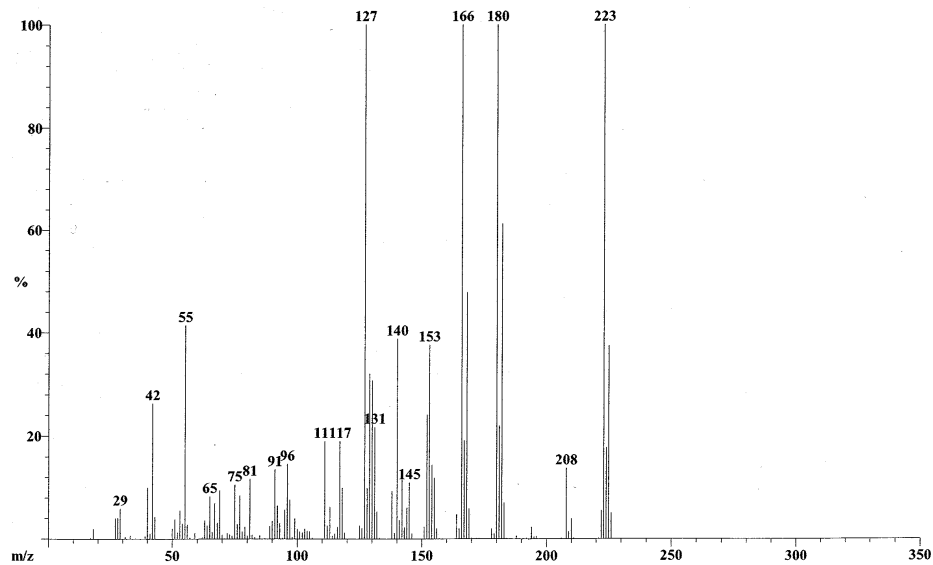



U.N.A.M. Instituto de Química ICH  
Dr. A. Cabrera  
Clave: Reacc700F31  
Disolvente: CDCl3  
Experimento: 13C  
Varian Inova 125 MHz (G)  
No. de registro 672  
10-04-12

File: 1H

Pulse Sequence: s2pu1

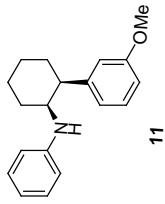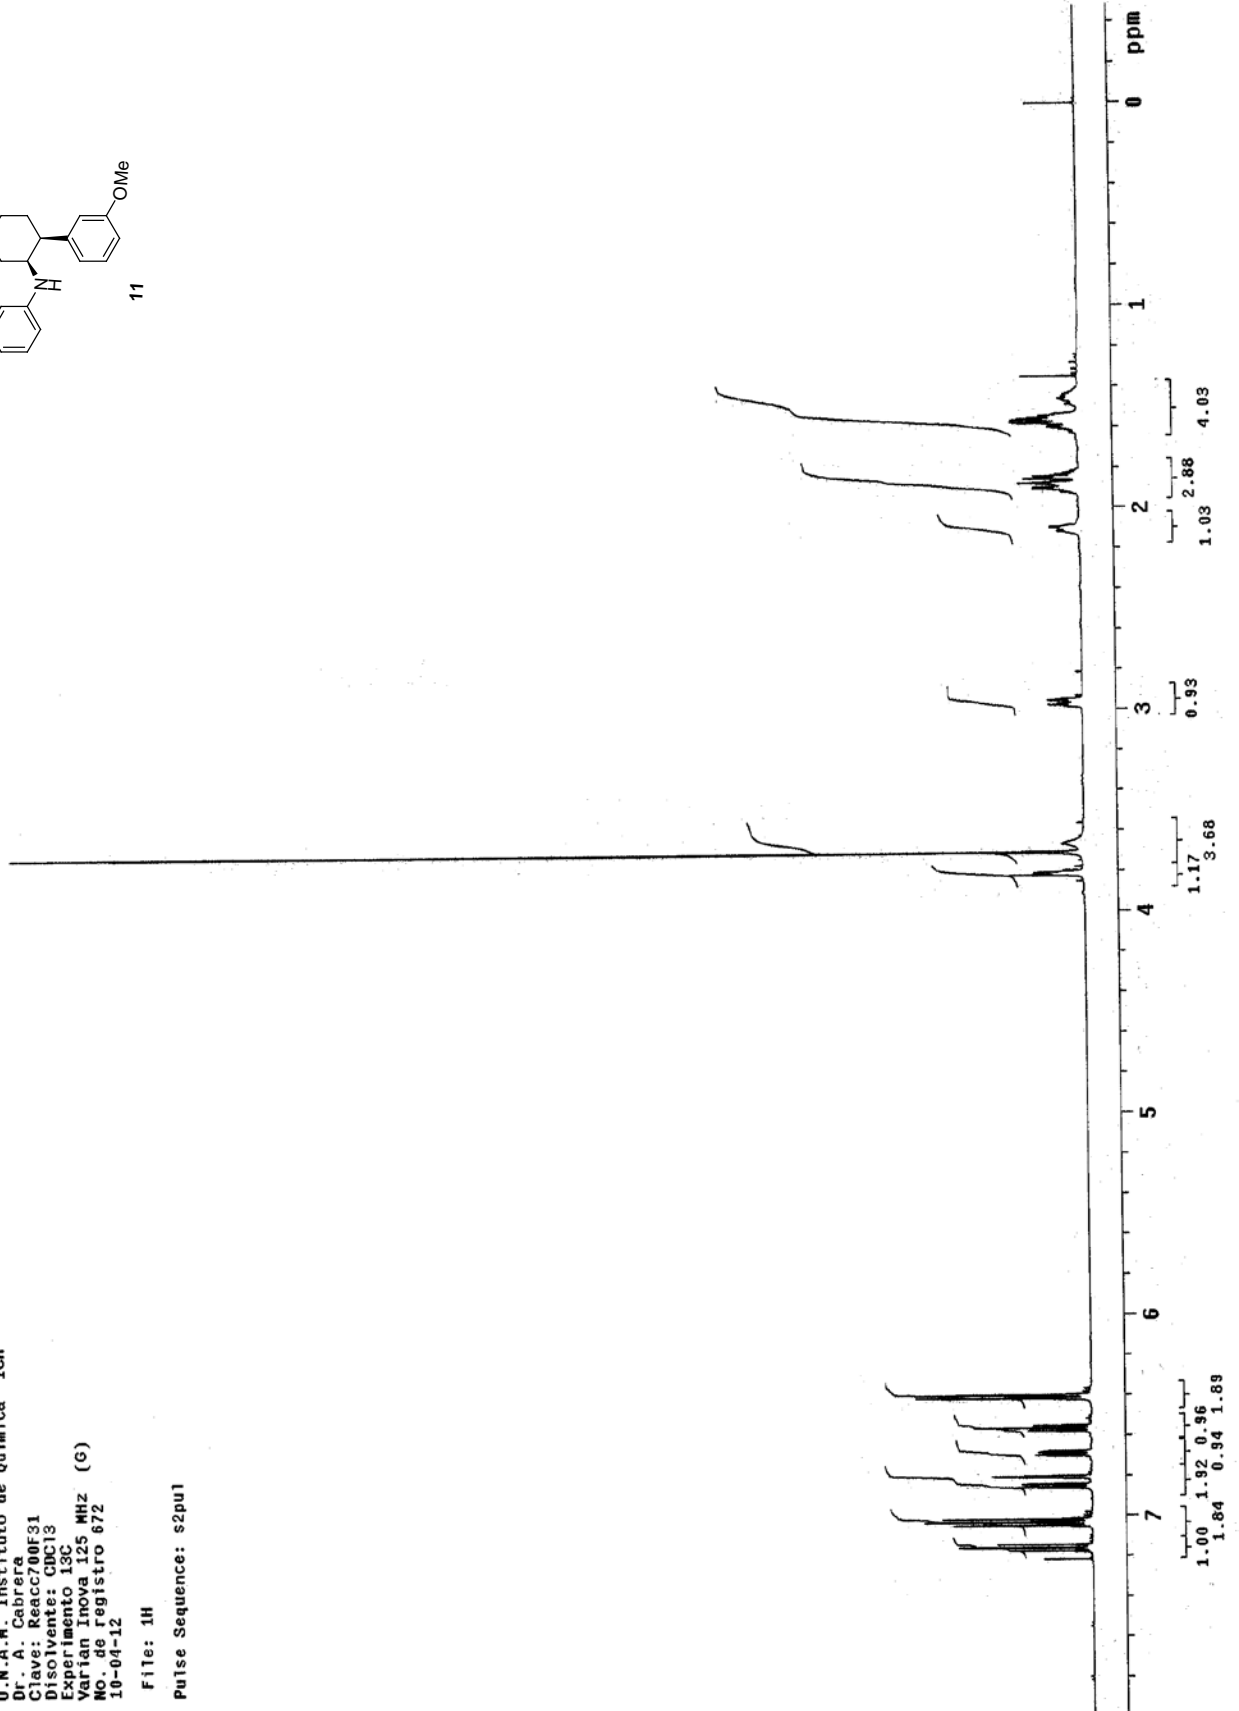

U.N.A.M. Instituto de Química ICH  
Dr. A. Cabrera  
Clave: Reacc700F31  
Disolvente: CDCl3  
Experimento: 13C  
Varian Inova 125 MHz (G)  
No. de registro 672  
10-04-12

File: 13C

Pulse Sequence: s2pu1

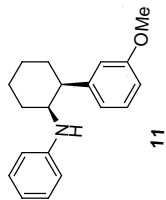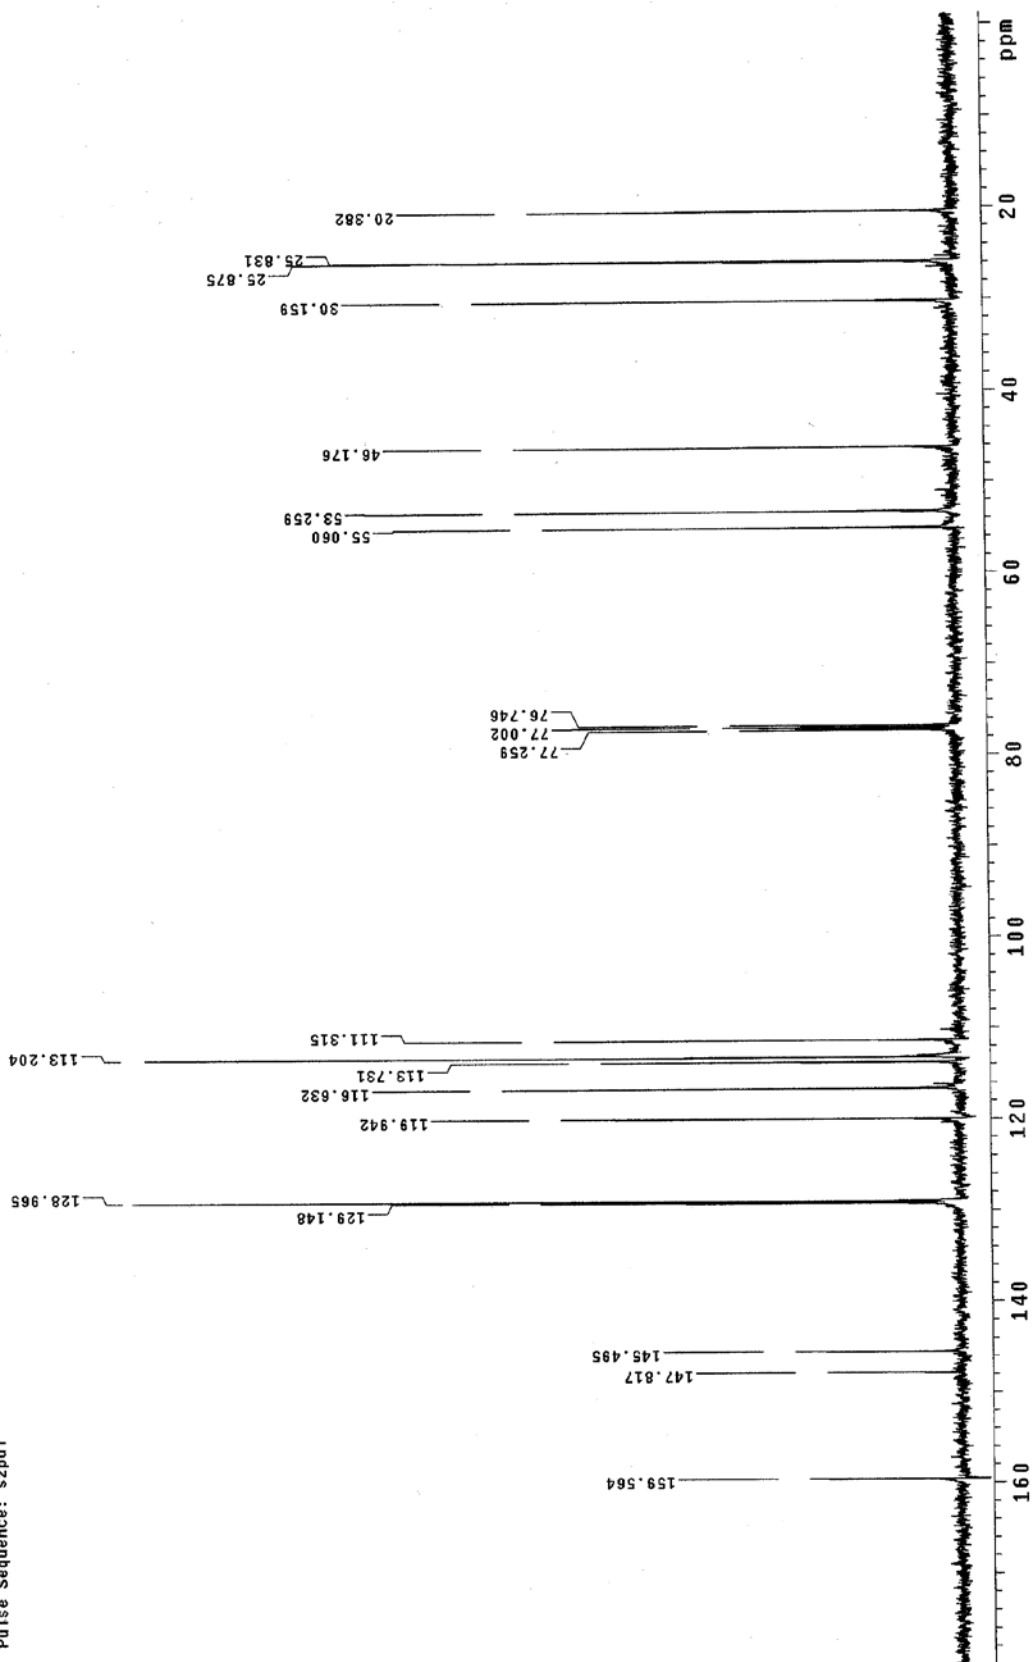

U.N.A.M. Instituto de Quimica ICH  
 D.A. Cabrera  
 Clave: Reacc700F31  
 Disolvente: CDCl3  
 Experimento: NQESY  
 Varian Inova 500 MHz (G)  
 No. de registro: 672  
 10-04-12

Pulse Sequence: noesy

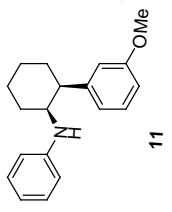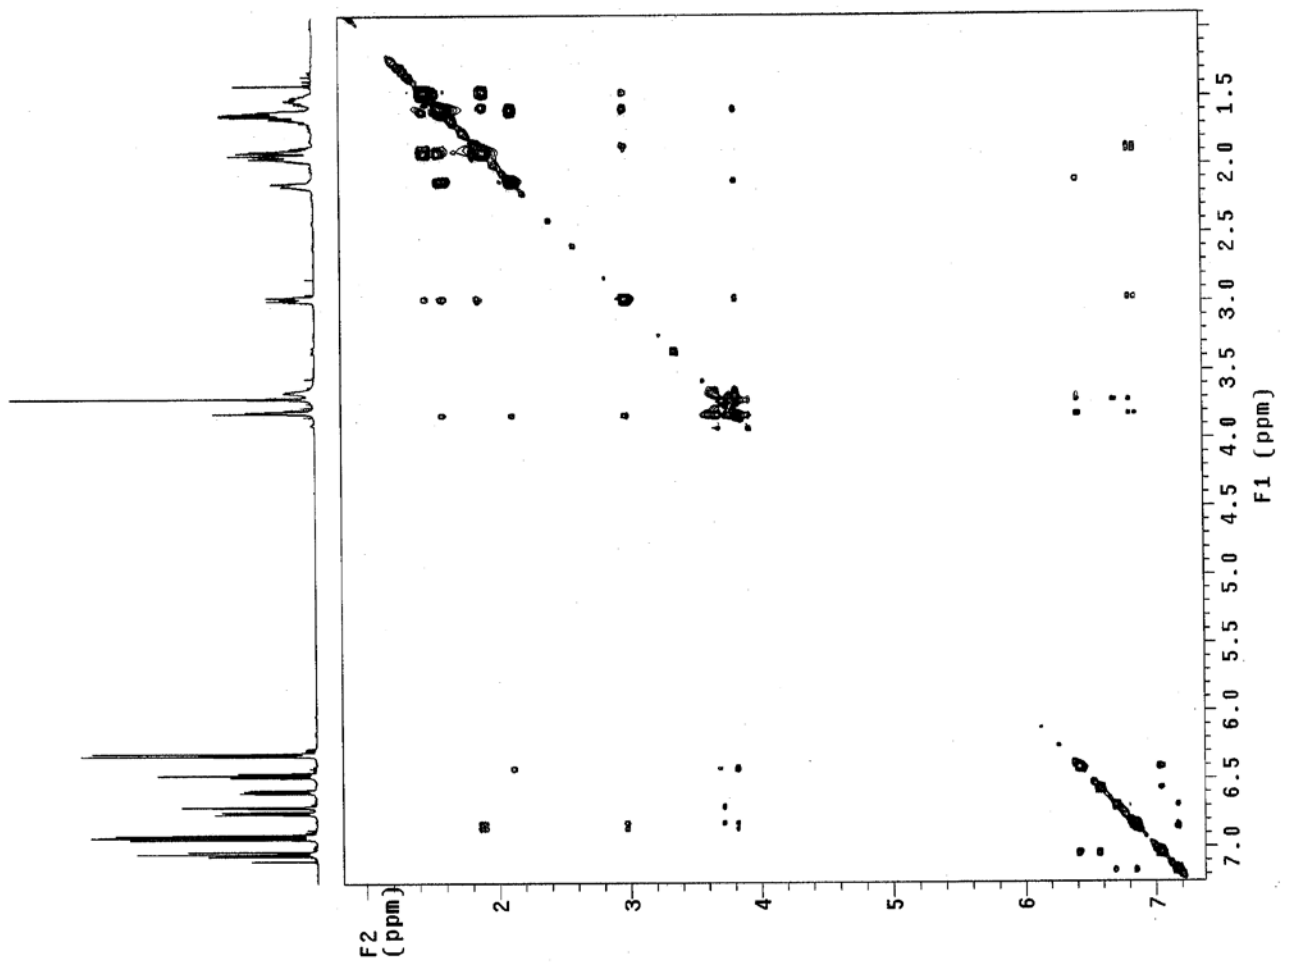

File: REACC -700F31-2  
 Sample: Dr Laura Rubio  
 Instrument: JEOL GCmate  
 Inlet: GC  
 Ionization mode: EI+  
 Date Run: 07-06-2012 (Time Run: 16:05:15)

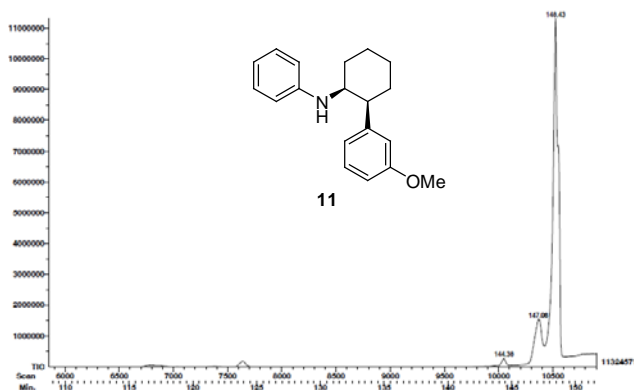

File: REACC -700F31-2  
 Sample: Dr Laura Rubio  
 Instrument: JEOL GCmate  
 Inlet: GC  
 Ionization mode: EI+  
 Date Run: 07-06-2012 (Time Run: 16:05:15)

Scan: 10366 R.T.: 147.08  
 Base: m/z 132; 11.3%FS TIC: 1557808

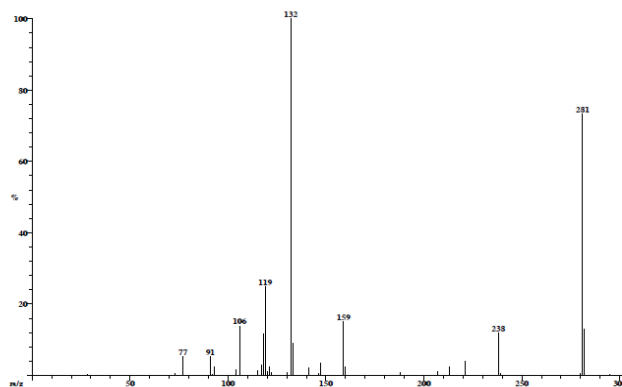

File: REACC -700F31-2  
 Sample: Dr Laura Rubio  
 Instrument: JEOL GCmate  
 Inlet: GC  
 Ionization mode: EI+  
 Date Run: 07-06-2012 (Time Run: 16:05:15)

Scan: 10525 R.T.: 148.43  
 Base: m/z 132; 35%FS TIC: 11463152

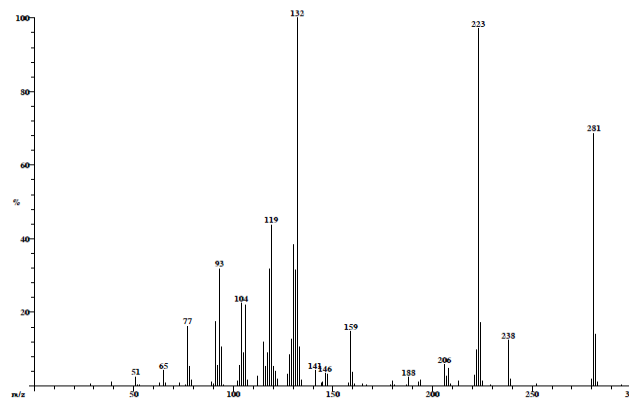

| Peak   | Compound Name | Peak   | RIC | Scan Range  | Baseline at  | Total Area | Background | Peak Area | Percentage |               |
|--------|---------------|--------|-----|-------------|--------------|------------|------------|-----------|------------|---------------|
| 147.88 |               | 147.88 | TIC | 10452-10465 | 10455        | 16561208   | 15102734   | 1458474   | 9.80298967 | Total Area    |
| 148.4  |               | 148.4  | TIC | 10518-10531 | 10518, 10532 | 1411140616 | 127721241  | 13419375  | 90.1970103 | 14877849      |
| 148.43 |               | 148.43 | TIC | 0-0         | 0            | 0          | 0          | 0         | 0          |               |
|        |               |        |     |             |              |            |            |           |            | Total Percent |
|        |               |        |     |             |              |            |            |           |            | 100           |

UNAM - Instituto de Química. (H. Ríos)  
Dr-A-Cabrera  
Clave: Reac547F26  
No. Registro: 908  
Experimento: RMN-1H  
Solvente: CDCl3  
Varian300MHz (G)  
26-Abr11-2012

File: std1h

Pulse Sequence: s2pu1

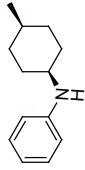

13

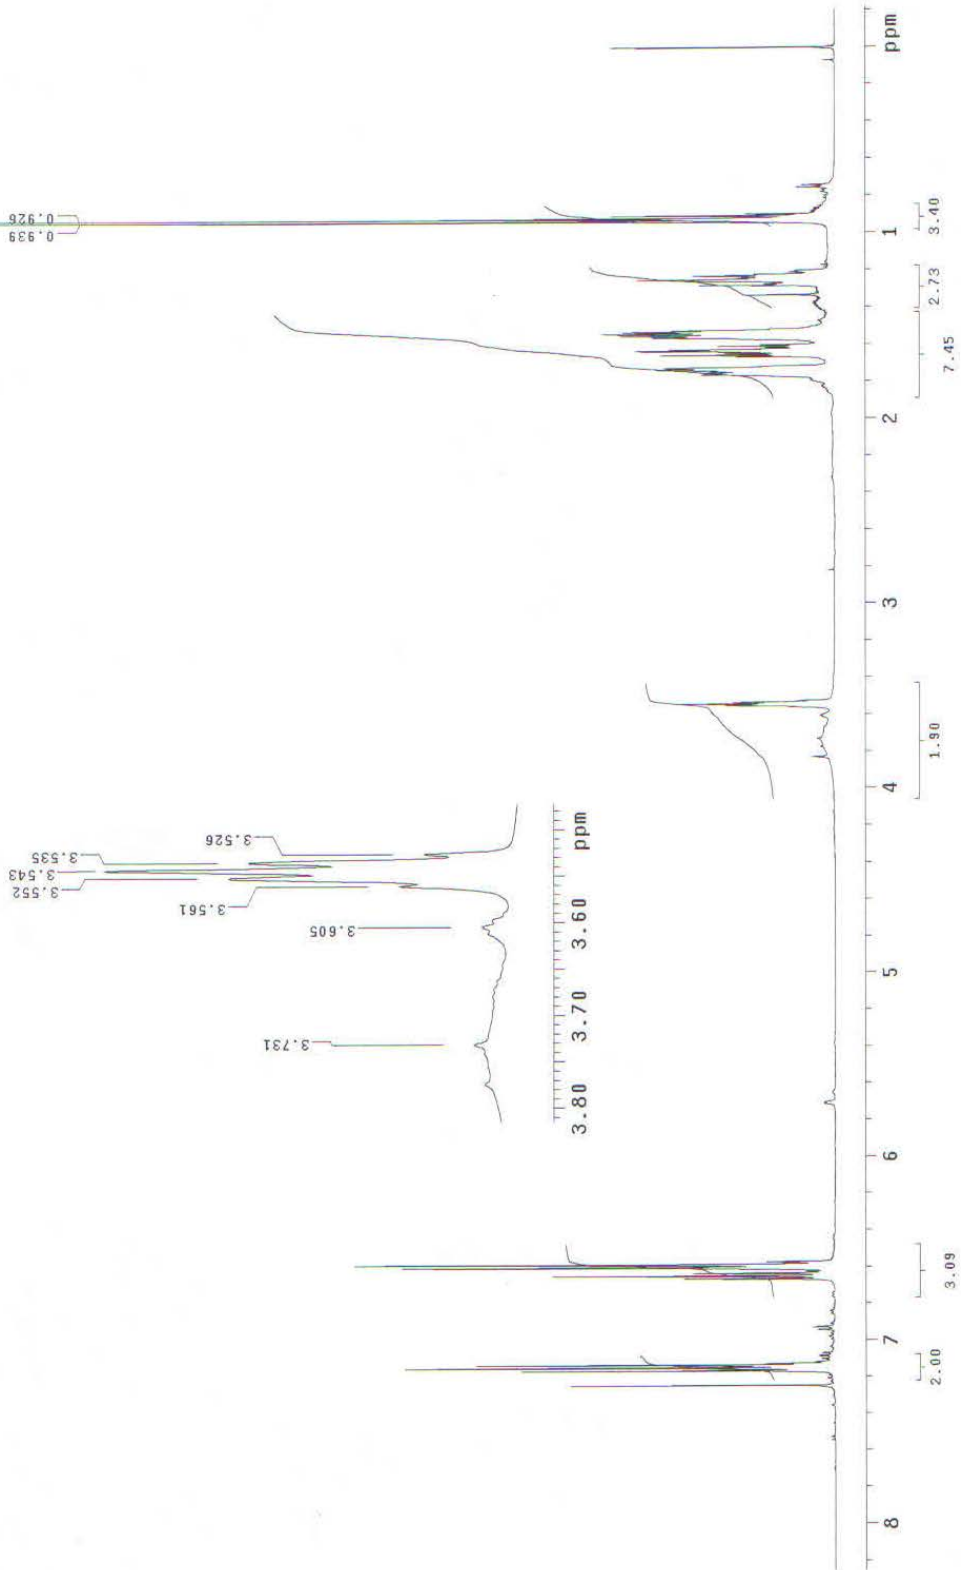

UNAM, Instituto de Química (H. Ríos)  
Dr-ACabrera  
Clave: Reac547F26  
No. registro: RM08  
Tipo muestra: RM08  
Disolvente: CDCl3  
Unidad/Inova-125.71MHz (G)  
26-Abr11-2012

File: Carbon

Pulse Sequence: s2pu1

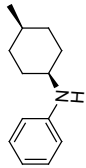

13

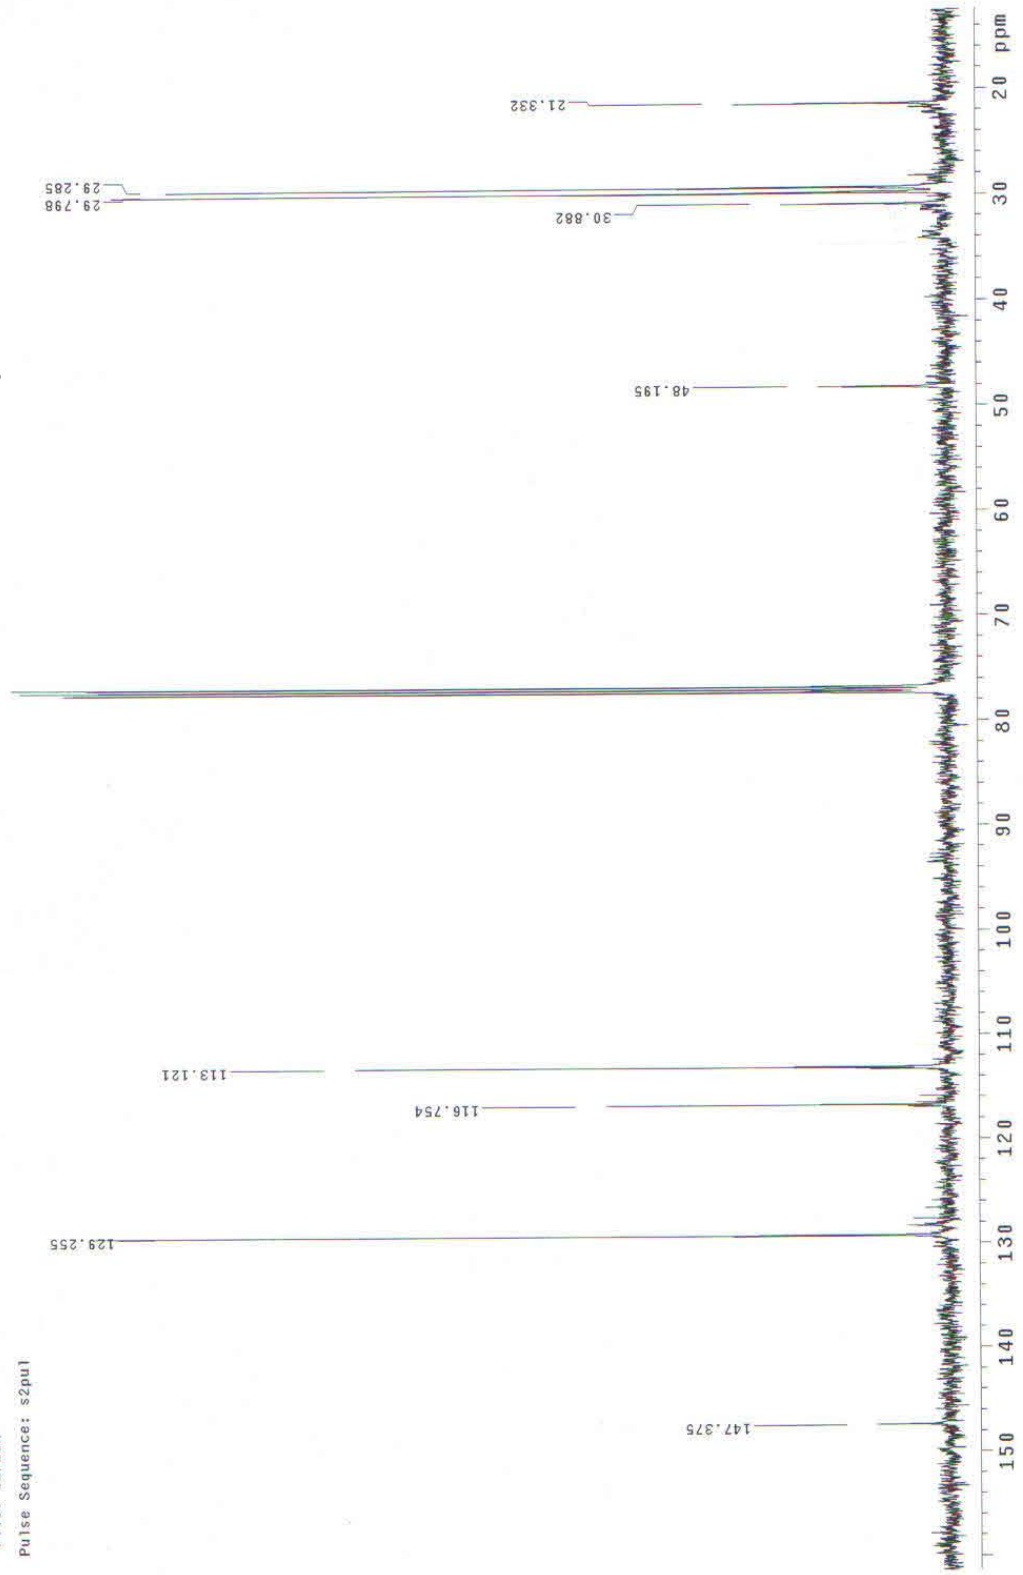

UNAM. Instituto de Química. (H. Ríos)  
 Dr-A-Cabrera  
 Clave: Reac547F26  
 No. Registro: 308  
 Experimento: MDE-Diff (Irrad. 3.54 ppm)  
 Solvente:  $CDCl_3$   
 Sarian300MHz (G)  
 28-Abr11-2012  
 Pulse Sequence: cyclenoe

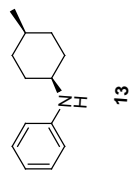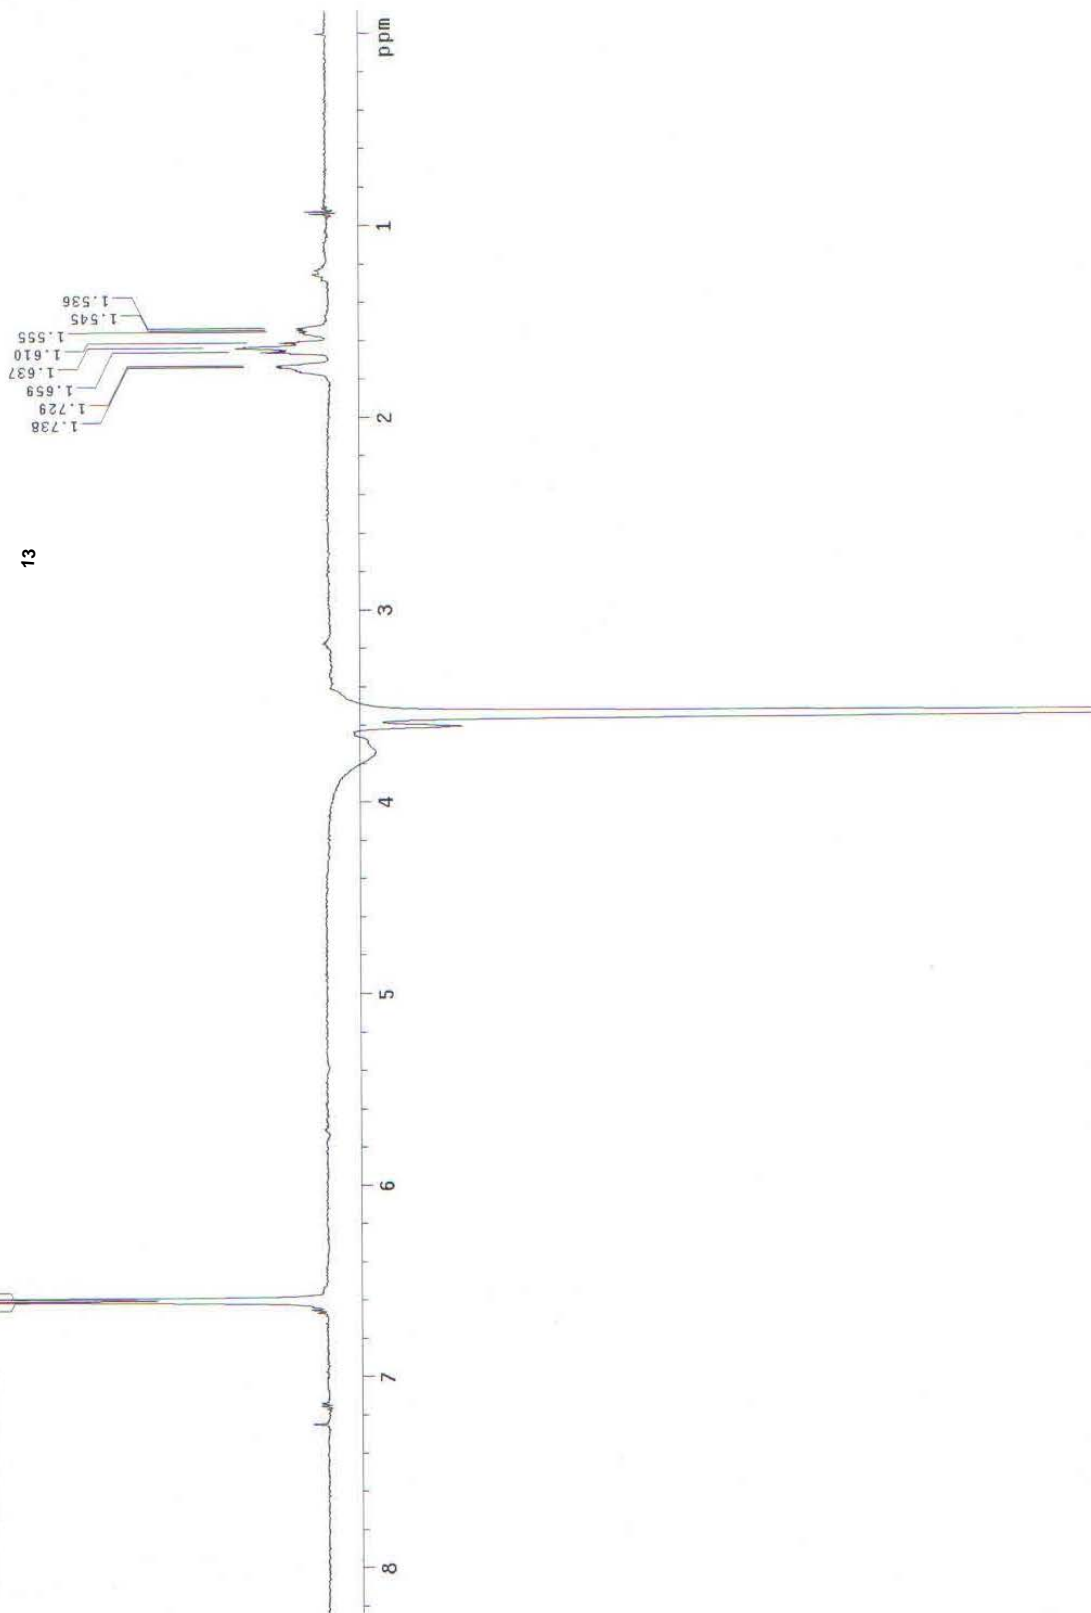

U.N.A.M. Instituto de Química ICH  
 Dr. A. Cabrera  
 Clave: Reac-725F12  
 Disolvente: CDCl3  
 Experiment: H  
 Varian Inova 500 MHz (G)  
 M. de Registro 1192  
 24-05-12

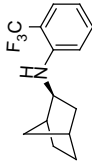

15

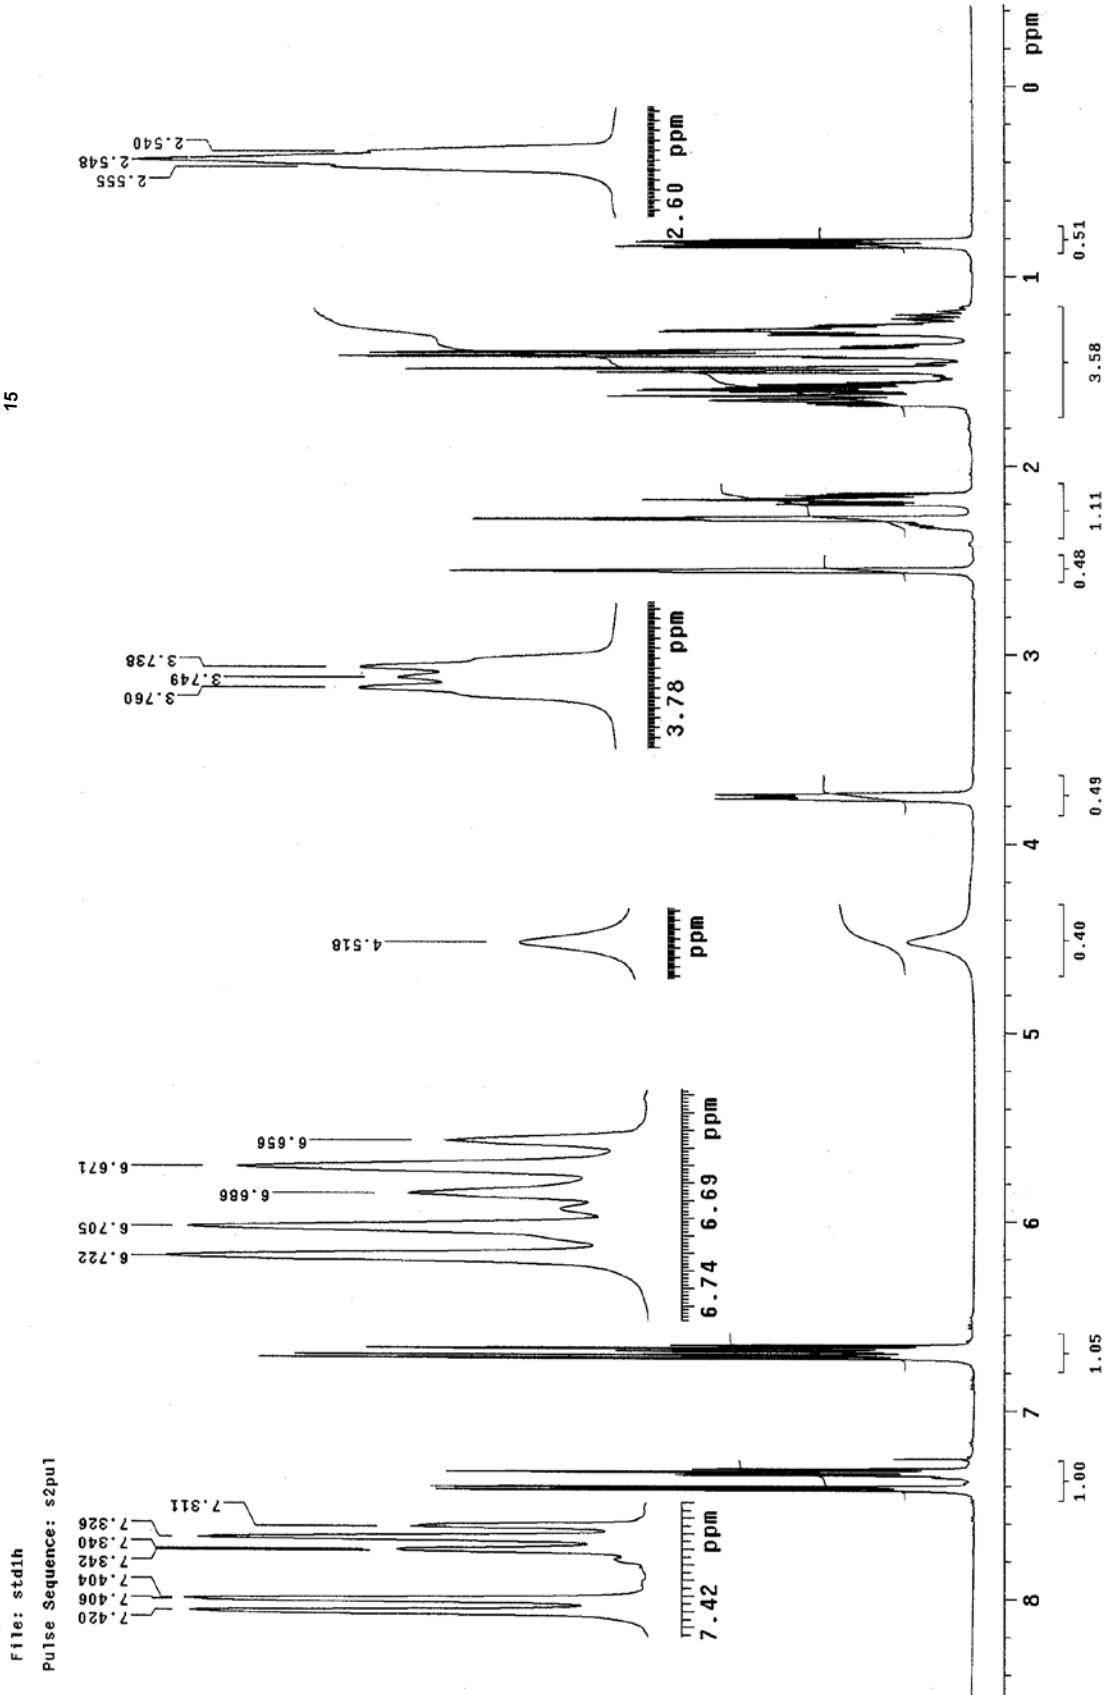



U.N.A.M. Instituto de Quimica ICH  
Dr. A. Cabrera  
Clave: Reacc 725F12  
Disolvente: CDCl3  
Experimento 13C  
Varian Inova 125 MHz (G)  
No. de registro 1192  
24-05-12

File: 13C

Pulse Sequence: s2pul

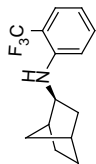

15

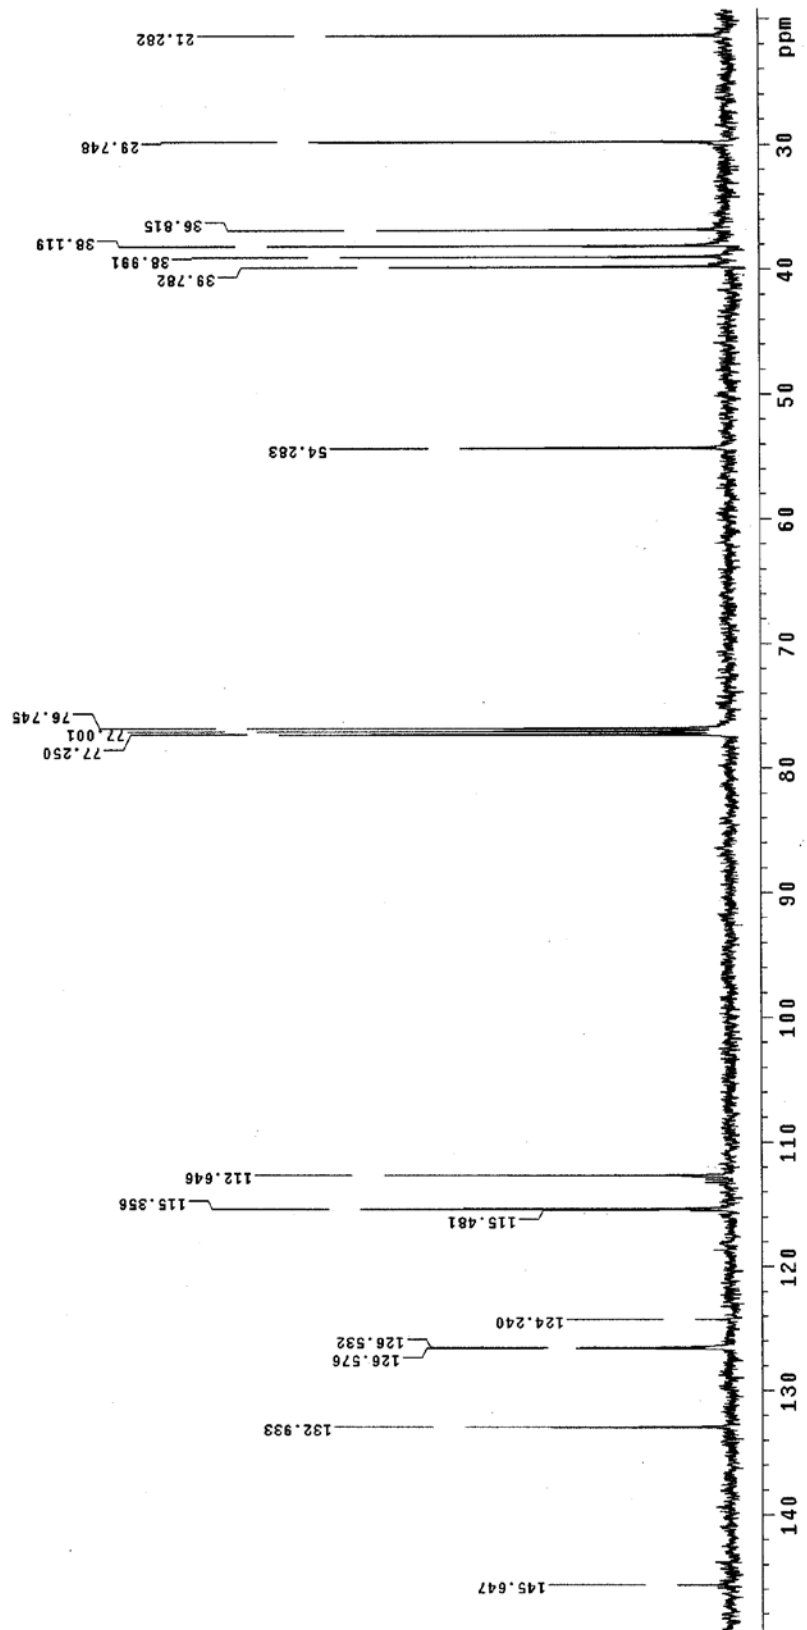

U.N.A.M. Instituto de Quimica ICH  
Dr. A. Cabrera  
Clave: Reacc 725F12  
Disolvente: CDCl3  
Experimento: NOESY  
Varian Inova 500 MHz (G)  
No. de registro 1192  
11-06-12

Pulse Sequence: noesy

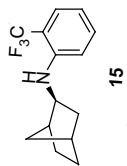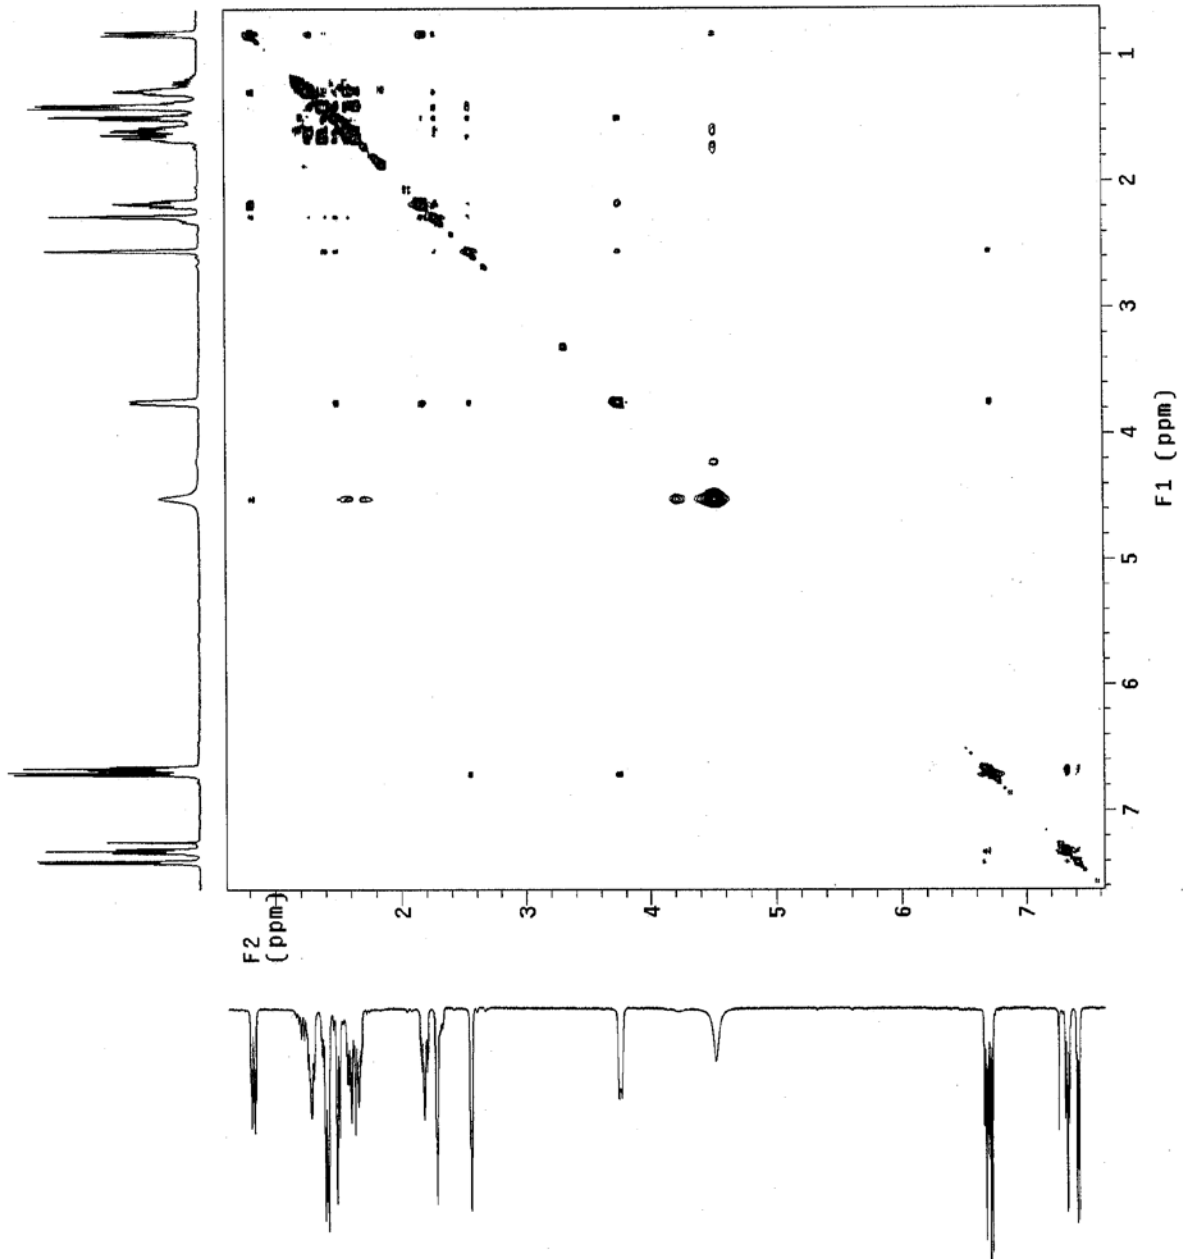

Data File C:\HPCHEM\1\DATA\COA00028.D  
Chiralpak IA Hex/iPrOH/ 99/1 flujo 0.5 mL/min

Sample Name: Reacc733F9Quiral

=====  
Injection Date : 01/06/12 8:38:50 PM  
Sample Name : Reacc725F9Quiral Vial : 1  
Acq. Operator : Erendira Garcia  
Method : C:\HPCHEM\1\METHODS\QUIRAL.M  
Last changed : 01/06/12 7:11:45 PM by Erendira Garcia  
(modified after loading)  
=====

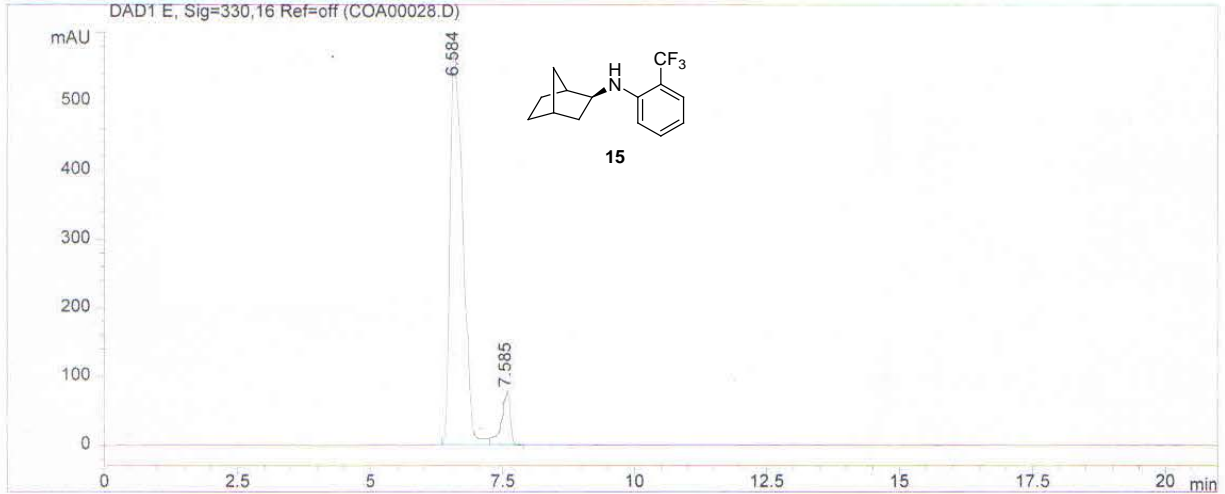

=====  
Area Percent Report  
=====

Sorted By : Signal  
Multiplier : 1.0000  
Dilution : 1.0000

Signal 1: DAD1 E, Sig=330,16 Ref=off  
Results obtained with enhanced integrator!

| Peak # | RetTime [min] | Type | Width [min] | Area [mAU*s] | Height [mAU] | Area %  |
|--------|---------------|------|-------------|--------------|--------------|---------|
| 1      | 6.584         | BV   | 0.2941      | 1.23782e4    | 568.26147    | 93.2883 |
| 2      | 7.585         | VP   | 0.1931      | 890.56598    | 76.88500     | 6.7117  |

Totals : 1.32688e4 645.14648

=====  
\*\*\* End of Report \*\*\*

ee = 86.57 ~ 87%
